1           **Mitochondrial architecture rearrangements produce**  
2           **asymmetrical nonadaptive mutational pressures that subvert**  
3           **the phylogenetic reconstruction in Isopoda**

4   Running title: Nonadaptive evolution and Isopoda mitogenomes

5   Dong Zhang<sup>1,2#</sup>, Hong Zou<sup>1#</sup>, Cong-Jie Hua<sup>1</sup>, Wen-Xiang Li<sup>1</sup>, Shahid Mahboob<sup>3,4</sup>, Khalid  
6   Abdullah Al-Ghanim<sup>3</sup>, Fahad Al-Misned<sup>3</sup>, Ivan Jakovlić<sup>5,\*</sup>, Gui-Tang Wang<sup>1,\*</sup>

7   <sup>1</sup> Key Laboratory of Aquaculture Disease Control, Ministry of Agriculture, and State Key  
8   Laboratory of Freshwater Ecology and Biotechnology, Institute of Hydrobiology, Chinese  
9   Academy of Sciences, Wuhan 430072, P. R. China

10   <sup>2</sup> University of Chinese Academy of Sciences, Beijing 100049, P. R. China

11   <sup>3</sup> Department of Zoology, College of Science, King Saud University, P.O. Box 2455,  
12   Riyadh-11451, Saudi Arabia.

13   <sup>4</sup> Department of Zoology, GC University, Faisalabad, Pakistan

14   <sup>5</sup> Bio-Transduction Lab, Wuhan 430075, P. R. China

15   # These authors contributed equally to this study.

16   \*Authors for Correspondence:

17   Gui-Tang Wang, Key Laboratory of Aquaculture Disease Control, Ministry of Agriculture and  
18   State Key Laboratory of Freshwater Ecology and Biotechnology, Institute of Hydrobiology,  
19   Chinese Academy of Sciences, Wuhan, 430072, China; Tel: +86-027 68780611, Email:  
20   [gtwang@ihb.ac.cn](mailto:gtwang@ihb.ac.cn)

21 Ivan Jakovlić, Bio-Transduction Lab, Wuhan 430075, China; Tel: +86-15927373207, Email:  
22 [ivanjakovlic@yahoo.com](mailto:ivanjakovlic@yahoo.com)

23

## 24 **Abstract**

25 The phylogeny of Isopoda, a speciose order of crustaceans, remains unresolved, with  
26 different datasets often producing starkly incongruent phylogenetic hypotheses. We  
27 hypothesised that extreme diversity in their life histories might be causing compositional  
28 heterogeneity/heterotachy in their mitochondrial genomes, and compromising the  
29 phylogenetic reconstruction. We tested the effects of different datasets (mitochondrial,  
30 nuclear, nucleotides, amino acids, concatenated genes, individual genes, gene orders),  
31 phylogenetic algorithms (assuming data homogeneity, heterogeneity, and heterotachy), and  
32 partitioning; and found that almost all of them produced unique topologies. As we also  
33 found that mitogenomes of Asellota and two Cymothoida families (Cymothoidae and  
34 Corallanidae) possess inversed base (GC) skew patterns in comparison to other isopods, we  
35 concluded that inverted skews cause long-branch attraction phylogenetic artefacts between  
36 these taxa. These asymmetrical skews are most likely driven by multiple independent  
37 inversions of origin of replication (i.e., nonadaptive mutational pressures). Although the  
38 PhyloBayes CAT-GTR algorithm managed to attenuate some of these artefacts (and  
39 outperform partitioning), mitochondrial data have limited applicability for reconstructing the  
40 phylogeny of Isopoda. Regardless of this, our analyses allowed us to propose solutions to  
41 some unresolved phylogenetic debates, and support Asellota are the most likely candidate  
42 for the basal isopod branch. As our findings show that architectural rearrangements can

43 produce major compositional biases even on short evolutionary timescales, the implications  
44 are that proving the suitability of data via composition skew analyses should be a  
45 prerequisite for every study that aims to use mitochondrial data for phylogenetic  
46 reconstruction, even among closely related taxa.

47

48 **Key words:** base composition skew; GC skew; mitochondrial phylogenomics; Cymothoidea;  
49 replication origin inversion; compositional heterogeneity

50

## 51 **Introduction**

52 Significant taxonomic and phylogenetic uncertainty permeates the entire order of Isopoda.  
53 The members of this highly speciose (>10,000) order of crustaceans (class Malacostraca)  
54 exhibit a remarkable diversity in their life histories (comprising both free-living and parasitic  
55 species) and occupy almost all habitats on the planet Earth (marine, freshwater and  
56 terrestrial), from deep sea vents to the Antarctica. The traditional morphology-based  
57 taxonomic classification and identification of isopods is further (aside from the speciosity)  
58 hampered by great intraspecific morphological variation, sexual dimorphism, sequential  
59 hermaphroditism, relatively flexible host preference, and global distribution of many species  
60 (Joca, Leray, Zigler, & Brusca, 2015; L. S. F. Lins, Ho, Wilson, & Lo, 2012; Luana S.F. Lins, Ho, &  
61 Lo, 2017; Rudy, Rendoš, Ľuptáčik, & Mock, 2018; Shen et al., 2017; Wetzer, 2002; George D.F.  
62 Wilson, 2008). However, molecular data also appear to be an unreliable tool for the task, as

63 different datasets (mitochondrial genes, mitochondrial genomes, nuclear genes, combined  
64 mitonuclear data) often produce very different topologies (Richard C. Brusca, 1981; Hata et  
65 al., 2017; Kilpert, Held, & Podsiadlowski, 2012; Luana S.F. Lins et al., 2017; Martin, Bruce, &  
66 Nowak, 2016; Poore & Bruce, 2012; Wetzer, 2002; G D F Wilson, 2009; Yu, An, Li, & Boyko,  
67 2018; Zou et al., 2018). As a result, even the identity of the basal isopod clade (defined as the  
68 sister-clade to all other isopod lineages (Krell & Cranston, 2004)) remains debated.  
69 Traditionally (morphology and single gene-based studies), Phreatoicidea was regarded as the  
70 basal clade (Kilpert et al., 2012; Wetzer, 2002; G D F Wilson, 2009), but some studies  
71 resolved Phreatoicidea+Aselotta at the base (Shen et al., 2017; G D F Wilson, 2009; George  
72 D.F. Wilson, 1999; Yu et al., 2018), one study found Limnoriidea (Luana S.F. Lins et al., 2017)  
73 at the base, whereas a few studies even resolved parasitic Cymothoidae and Corallanidae  
74 (suborder Cymothoida) at the base (Hua et al., 2018; L. S. F. Lins et al., 2012; Luana S.F. Lins  
75 et al., 2017; G D F Wilson, 2009; Zou et al., 2018). As the Cymothoida was traditionally  
76 regarded as the most derived isopod clade (Richard C. Brusca, 1981; Kilpert et al., 2012;  
77 Wetzer, 2002; G D F Wilson, 2009), these alternative hypotheses cannot be described as  
78 minor topological instability. The monophyly of suborder Cymothoida is generally supported  
79 by the morphological data, but rejected by the molecular data (Brandt & Poore, 2003; Hua et  
80 al., 2018; Kilpert et al., 2012; Luana S.F. Lins et al., 2017; Shen et al., 2017; G D F Wilson,  
81 2009; Yu et al., 2018; Zou et al., 2018). Among a number of other unresolved phylogenetic  
82 issues permeating this order are the monophyly of the suborder Oniscidea (supported by  
83 morphology, sometimes rejected by molecular data) and the existence of several 'rogue'  
84 species/taxa, such as *Ligia oceanica* (Ligiidae), *Eurydice pulchra*, and *Limnoria*

85 *quadripunctata* (Limnoriidae), whose positions in the isopod clade often vary among studies  
86 (Kilpert et al., 2012; Luana S.F. Lins et al., 2017; Schmidt, 2008; Shen et al., 2017; Wetzer,  
87 Pérez-Losada, & Bruce, 2013; G D F Wilson, 2009; Yu et al., 2018).

88 Historically, variation found within gene sequences was typically considered to  
89 accumulate under a neutral equilibrium model, so commonly used phylogenetic  
90 reconstruction algorithms assume homogeneity in mutational rates. As this paradigm began  
91 to change during the last few decades (Wolff, Ladoukakis, Enríquez, & Dowling, 2014), this  
92 was accompanied by a growing amount of evidence that compositional heterogeneity can  
93 compromise phylogenetic reconstruction in some taxa and that evolutionary models  
94 operating under that prerequisite may not be suitable for all phylogenetic studies (Cameron,  
95 2014; Hassanin, 2006; Kolaczkowski & Thornton, 2004; Lartillot, Brinkmann, & Philippe, 2007;  
96 Morgan et al., 2013; Phillips, McLenachan, Down, Gibb, & Penny, 2006; Sheffield, Song,  
97 Cameron, & Whiting, 2009; Zhong et al., 2011). However, the feud about the most suitable  
98 methodological approach to account for this heterogeneity remains unresolved, with most  
99 prominent contenders currently being the CAT models (Feuda et al., 2017), and partitioning  
100 schemes, i.e. different evolutionary models assigned to different character blocks, assuming  
101 homogeneity within each block (Whelan & Halanych, 2017). Although these two approaches  
102 account for rate heterogeneity across sites, they still assume that substitution rates for sites  
103 are constant across all included lineages. From the evolutionary perspective this is not a  
104 likely scenario, as substitution rates are likely to be both site- and lineage-specific (Crotty et  
105 al., 2017). Indeed, heterotachy, variations in lineage-specific evolutionary rates over time

106 (Lopez, Casane, & Philippe, 2002), is widespread in eukaryotes (Baele, Raes, Van De Peer, &  
107 Vansteelandt, 2006).

108 Mitochondrial genomes (mitogenomes) generally provide much higher phylogenetic  
109 resolution than traditionally used morphological and single gene-based molecular markers  
110 (Nie et al., 2018), so mitochondrial phylogenomics is increasingly used to tackle phylogenetic  
111 controversies (Bourguignon et al., 2018; Cameron, 2014; Der Sarkissian et al., 2015; Lan et al.,  
112 2017; Li et al., 2017). Although the resolution of this approach is still limited by a very small  
113 number of available mitogenomes in isopods, overview of published studies shows that they  
114 also failed to produce results congruent with other approaches, failed to resolve the rogue  
115 taxa issues, and taken as a whole generated more questions than answers (Hua et al., 2018;  
116 Kilpert et al., 2012; Luana S.F. Lins et al., 2017; Shen et al., 2017; Yu et al., 2018; Zou et al.,  
117 2018).

118 The evolutionary history of Isopoda abounds in independent (major) life history  
119 innovations, such as free-living to parasitic lifestyle (Hata et al., 2017; Jones, Miller, Grutter,  
120 & Cribb, 2008; Ketmaier, Joyce, Horton, & Mariani, 2008; Poore & Bruce, 2012), and radical  
121 habitat expansions (L. S. F. Lins et al., 2012), such as sea to freshwater, or even water to land  
122 (Broly, Deville, & Maillet, 2013; Hata et al., 2017; George D.F. Wilson, 2008). It has been  
123 proposed that the Cymothoida may have originated in deep seas, subsequently expanded to  
124 shallow seas, and then to brackish and freshwater (likely on several independent occasions)  
125 (Hata et al., 2017). Signals of adaptation to high altitude (Hassanin, Ropiquet, Couloux, &  
126 Cruaud, 2009; Mishmar et al., 2003; Scott et al., 2011), deep-sea environment (Almeida,  
127 Maldonado, Vasconcelos, & Antunes, 2015), and shifts in physiological demands

128 (Botero-Castro et al., 2018; Hassanin, 2006) have been identified in mitogenomes of a range  
129 of animals. It is therefore highly likely that radical adaptations to life in different  
130 environments, from the anoxic environment of deep sea-inhabiting isopod species (L. S. F.  
131 Lins et al., 2012) to terrestrial species, would produce strikingly different evolutionary  
132 pressures on genomes of species, and result in disparate evolutionary rates of mitochondrial  
133 genes, which are central to energy production via the oxidative phosphorylation (Gawryluk  
134 et al., 2016). In agreement with this hypothesis are uneven evolutionary rates (dN/dS)  
135 observed among isopod mitogenomes (Shen et al., 2017) and different mutational rates of  
136 protein-coding genes (PCGs) encoded on the majority (or plus) strand among different  
137 lineages of isopods (Lloyd et al., 2015). Conflicting phylogenetic signals among different  
138 mitochondrial regions have been reported in a number of metazoan groups, which indicates  
139 that different mitochondrial regions can accumulate substitutions in ways that are difficult to  
140 model, which can result in biased estimates of phylogeny (Meiklejohn et al., 2014). There is  
141 evidence that this compositional heterogeneity may be comparatively highly pronounced in  
142 mitogenomes of some arthropod taxa (Cameron, 2014; Hassanin, 2006; Liu, Li, Jakovlić, &  
143 Yuan, 2017). We therefore hypothesised that the aforementioned extreme life history  
144 diversity of isopods might cause pronounced compositional heterogeneity/heterotachy in  
145 their mitogenomes, and interfere with the reconstruction of the Isopoda phylogeny.  
146 Although limitations of mitochondrial (and molecular in general) data for inferring  
147 phylogenies have been widely discussed (Ballard & Whitlock, 2004; Edwards, Potter, Schmitt,  
148 Bragg, & Moritz, 2016; Grechko, 2013; Hassanin, Léger, & Deutsch, 2005; Rubinoff, Holland,  
149 & Savolainen, 2005; Talavera et al., 2011; Willis, 2017), a review of the existing literature

150 reveals that most previous studies of evolutionary history of Isopoda ignored those  
151 limitations, or attempted to ameliorate them by using such strategies combined datasets  
152 (mtDNA, nuclear DNA, morphology) (Luana S.F. Lins et al., 2017; G D F Wilson, 2009), amino  
153 acid sequences (Kilpert et al., 2012; Luana S.F. Lins et al., 2017), or applying different models  
154 to each codon position (Hata et al., 2017). However, none of those studies attempted to use  
155 algorithms designed specifically to account for compositional heterogeneity/tachy, nor  
156 studied this problem directly. To test the hypothesis that compositional heterogeneity  
157 interferes with phylogenetic reconstruction in Isopoda, we used a number of different  
158 datasets: mitochondrial DNA (single genes, genomes, nucleotides, amino acids, gene orders)  
159 and nuclear DNA (*18S*); and methodological approaches: dataset partitioning, maximum  
160 likelihood (ML), Bayesian inference (BI), parsimony, PhyloBayes (PB) CAT-GTR model  
161 (heterogeneous), and GHOST (heterotachous).

## 162 **Materials and Methods**

163 PhyloSuite (Zhang et al., 2018) was used to batch-download all selected mitogenomes from  
164 the GenBank, extract genomic features, translate genes into amino acid sequences,  
165 semi-automatically re-annotate ambiguously annotated tRNA genes with the help of the  
166 ARWEN (Laslett & Canbäck, 2008) output, automatically replace the GenBank taxonomy with  
167 the WoRMS database taxonomy, as the latter tends to be more up to date (Costello et al.,  
168 2013), generate comparative genome statistics tables, and conduct phylogenetic analyses  
169 (Flowchart mode) using a number of incorporated plug-in programs. Nucleotide and amino



170 acid sequences of protein-coding genes (PCGs) were aligned in batches (using codon and  
171 normal-alignment modes respectively) with '--auto' strategy, whereas rRNA genes (including  
172 the nuclear *18S*) were aligned using Q-INS-i algorithm, which takes secondary structure  
173 information into account, all implemented in MAFFT (Katoh & Standley, 2013; Katoh & Toh,  
174 2008). Gblocks (Castresana, 2000; Talavera & Castresana, 2007) was used to remove  
175 ambiguously aligned regions from the concatenated alignments with default parameter  
176 settings. PhyloSuite was used to concatenate the alignments (all provided in the File S4).  
177 Data partitioning schemes were inferred using PartitionFinder2 (Lanfear, Calcott, Ho, &  
178 Guindon, 2012), and selection of the most appropriate evolutionary models for each  
179 partition was computed according to the Bayesian information criterion scores and weights  
180 using ModelFinder (Kalyaanamoorthy, Minh, Wong, Von Haeseler, & Jermin, 2017).  
181 Chi-square ( $\chi^2$ ) test for the homogeneity of character composition of aligned sequences was  
182 performed using IQ-TREE 1.6.8 (Trifinopoulos, Nguyen, von Haeseler, & Minh, 2016).  
183 Standard (homogeneous models) phylogenetic analyses were conducted using two programs  
184 integrated into PhyloSuite: MrBayes 3.2.6 (Bayesian inference, BI) (Ronquist et al., 2012) and  
185 IQ-TREE (Maximum Likelihood, ML). PAUP\* 4.0 was used to conduct Parsimony analyses via  
186 heuristic searching (TBR branch swapping) and 500 random addition sequence replicates,  
187 and bootstrap branch support was calculated via heuristic searches on 1000 pseudo-replicate  
188 datasets (Swofford, 2002). The heterogeneous CAT-GTR model is implemented in  
189 PhyloBayes-MPI 1.7a (PB) (Lartillot et al., 2007), and the heterotachous GHOST model is  
190 implemented in IQ-TREE (Crotty et al., 2017). PhyloBayes was run on the beta version of the  
191 Cipres server (<https://cushion3.sdsc.edu/portal2/tools.action>) (Miller, Pfeiffer, & Schwartz,

192 2010), with default parameters (burnin = 500, invariable sites automatically removed from  
193 the alignment, two MCMC chains), and the analysis was stopped when the conditions  
194 considered to indicate a good run (PhyloBayes manual) were reached (maxdiff < 0.1 and  
195 minimum effective size > 300). The phylogenetic tree inferred from the gene-order (GO)  
196 dataset was reconstructed using MLGO (Hu, Lin, & Tang, 2014), with 1000 bootstrap  
197 replicates, and an input file generated by PhyloSuite. Phylograms and gene orders were  
198 visualized in iTOL (Letunic & Bork, 2007), and annotated using files generated by PhyloSuite.  
199 Skews were calculated and plotted using PhyloSuite and GraphDNA (Thomas, Horspool,  
200 Brown, Tcherepanov, & Upton, 2007).

## 201 **Results**

### 202 **Mitochondrial datasets**

203 As a majority of available isopod mitogenomes are incomplete, we were faced with the  
204 trade-off between the amount of data used in the analysis and the number of species used:  
205 after removing six (some incomplete and duplicates) of the 27 available isopod mitogenomes  
206 (Oct. 2018), the dataset comprised 8 complete and 13 partial sequences (Table 1). To  
207 attempt to resolve the debated issue of the basal Isopod clade with maximum resolution, we  
208 used a relatively large number of outgroups for phylogenetic analyses: a basal arthropod,  
209 *Limulus polyphemus* (Lavrov, Boore, & Brown, 2000), and a number of closely related  
210 non-isopod malacostracan taxa: three Decapoda, two Stomatopoda, two Amphipoda, one  
211 Mysida and one Euphausiacea species (Kilpert & Podsiadlowski, 2006; G D F Wilson, 2009).  
212 We conducted phylogenetic analyses using a number of different datasets: NUC - nucleotides

213 of concatenated 13 PCGs and two rRNA genes (*rrnL* and *rrnS*); AAs – concatenated amino  
214 acid sequences of 13 PCGs; 15 single-gene datasets (13 PCGs + 2 rRNAs); gene families  
215 (*nad+atp* and *cox+cytb*); and gene orders. We also tested the performance of data  
216 partitioning, by conducting the same analyses on both non-partitioned and partitioned  
217 datasets. The best partitioning scheme divided the NUC dataset by individual genes, with  
218 only *cox2/cox3*, *atp6/nad3*, and *rrnS/L* placed together in a same partition. Further details  
219 available in Supporting Information (File S1).

### 220 **Compositional heterogeneity tests**

221 Best-fit model for the non-partitioned NUC dataset was GTR+F+R6. In the partitioned dataset,  
222 three *nad* family genes (*nad1+2+4*) and *atp8* were assigned the TVM+I+G model, and *nad6*  
223 the HKY+I+G model, whereas all nine remaining genes were assigned the GTR+I+G model  
224 (File S1). In the  $\chi^2$  compositional homogeneity test of the non-partitioned NUC dataset,  
225 where a sequence was denoted ‘failed’ if its nucleotide composition significantly deviated  
226 from the average composition of the alignment, only an outgroup species *Penaeus vannamei*  
227 passed the test (30 sequences failed). However, only 11 species failed the test in the AAs  
228 dataset, indicating that the use of amino acids can attenuate compositional heterogeneity.

### 229 **Methodological approaches to infer phylogeny**

230 We tested the performance of two phylogenetic methods relying on standard homogenous  
231 models, maximum likelihood (ML) and Bayesian inference (BI), on non-partitioned and  
232 partitioned data, and non-standard heterogeneous (CAT-GTR) and heterotachous (GHOST)  
233 models on our datasets. The latter two models require the input data to be non-partitioned.

234 The CAT-GTR site mixture model implemented in Phylobayes-MPI 1.7a (Lartillot et al., 2007)  
235 allows for site-specific rates of mutation, which is considered to be a more realistic model of  
236 amino acid evolution, especially for large multi-gene alignments (Maddock et al., 2016).  
237 GHOST model is an edge-unlinked mixture model consisting of several site classes with  
238 separate sets of model parameters and edge lengths on the same tree topology, thus  
239 naturally accounting for heterotachous evolution (Crotty et al., 2017).

#### 240 **NUC dataset**

241 GHOST, BI and ML analyses (both partitioned and non-partitioned) of the NUC dataset  
242 produced highly congruent topologies (referred to as the ‘NUC-consensus’ topology  
243 henceforth). Statistical support values were very high in BI (Fig. 1; all inferred topologies  
244 available in the Supporting information: File S2), relatively high in GHOST, and intermediate  
245 in ML analyses (low to high). Decapoda were rendered paraphyletic by the Euphausiacea  
246 nested within the clade (not in the ML-partitioned tree), and Mysida+Amphipoda were  
247 resolved as the sister-clade to Isopoda. In the isopod clade, Cymothoidae+Corallanidae  
248 families (Cymothoida) formed the basal clade, followed by Asellota and Phreatoicoidea  
249 branches. The remaining isopods were divided into two sister-clades: Oniscidea and a  
250 ‘catch-all’ clade comprising Limnoriidea, Valvifera, Sphaeromatidea, *L. oceanica* (a ‘rogue’  
251 Oniscidea species), and the remaining three Cymothoida species (*Gyge ovalis*, *Bathynomus*  
252 sp. and *Eurydice pulchra*), which did not cluster together (Fig. 1). Parsimony analysis  
253 produced a slightly rearranged topology, but crucial features were identical:  
254 Mysida+Amphipoda were the sister-clade to Isopoda, and Cymothoidae+Corallanidae were  
255 basal isopods. Notable differences were: Asellota forming a sister-clade with *G. ovalis* + *L.*

256 *quadripunctata*, and Phreatoicidea at the base of the catch-all clade. The PB analysis  
257 produced a notably different overall topology, with all non-isopod lineages forming a  
258 sister-clade to the isopods (monophyletic Decapoda), but the topology of the isopod clade  
259 was relatively similar to the NUC-consensus, apart from the rogue *Gyge ovalis* (Fig. 2).

## 260 **Single-gene and concatenated gene family datasets**

261 As we hypothesised that the topological instability may be driven by conflicting signals  
262 produced by different genes (Meiklejohn et al., 2014), we conducted ML phylogenetic  
263 analyses on 15 single-gene datasets (13 PCGs + 2 rRNAs). Surprisingly, all these produced  
264 unique topologies (File S2). *Atp6* resolved Asellota+Cymothoidae+Corallanidae as the basal  
265 isopod clade; *atp8* (a very small gene) produced an almost nonsensical topology (defined as:  
266 in stark disagreement with any reasonable phylogenetic hypothesis); *nad1* resolved Asellota  
267 at the base; *nad2* produced a slightly rearranged NUC-consensus topology; *nad3* (also small,  
268 ≈350bp) a nonsensical topology; *nad4* produced a rearranged topology (compared to  
269 NUC-consensus), but Cymothoidae+Corralanidae were the basal isopod clade; *nad4L* (small  
270 gene) produced a highly rearranged isopod clade; despite its large size (≈1700bp); *nad5*  
271 produced a non-canonical isopod topology; *nad6* produced a nonsensical topology  
272 (paraphyletic Isopoda, rogue *G. ovalis*); *cox1* produced a highly rearranged topology,  
273 including both the non-isopod malacostraca and isopod clades, with  
274 Phreatoicidea+Cymothoidae+Corralanidae as the basal isopod clade, and non-canonical  
275 Valvifera position; *cox2* produced a slightly rearranged NUC-consensus topology; *cox3*  
276 produced a highly rearranged topology, with a unique Asellota+Corallanidae clade at the  
277 isopod base and *L. quadripunctata* nested within the Oniscidea; *cytb* produced basal

278 Phreatoicidea, and the remaining taxa divided into Oniscidea and 'catch all' sister-clades,  
279 where the rogue Cymothoidae+Corallanidae (along with Asellota) were on a long branch in  
280 the derived part of the clade; *rrnS* (or *12S*) topology was in some aspects similar to *cytb*, but  
281 with Phreatoicidea+Limnoriidea as the basal isopod clade; *rrnL* (or *16S*) produced an almost  
282 nonsensical topology, with paraphyletic Isopoda and rogue *G. ovalis*.

283 As some of the previous studies (see Introduction) used datasets combined of several  
284 genes, and as some of our optimal partitioning strategy analyses indicated that different  
285 gene families might evolve at somewhat congruent rates, we divided the PCG dataset into  
286 two concatenated gene families: *nad\_atp* (*nad1-6* and *atp6-8*) and *cox\_cytb* (*cox1-3* and  
287 *cytb*). ML analyses of both datasets also produced unique topologies. In comparison to  
288 NUC-consensus tree, *nad\_atp* dataset resolved Mysida as the sister-group to all other  
289 Malacostraca, and rearranged Phreatoicidea, Limnoriidea and *G. ovalis*. *Cox\_cytb* dataset  
290 produced somewhat rearranged non-isopod Malacostraca, a minor discrepancy in the  
291 position of *E. pulchra*, and slightly rearranged Oniscidea. Notably, none of the single-gene  
292 topologies corresponded to the two family topologies.

### 293 **AAs dataset: amino acids of 13 PCGs**

294 Amino acids produced topologies that differed from the NUC-consensus one, with instable  
295 topology of the non-isopod Malacostraca, including paraphyletic Eucarida  
296 (Decapoda+Euphausiacea) in five (BI/ML, non-partitioned/partitioned, and GHOST; Fig. 3)  
297 out of six (PB; Fig. 4) analyses. Sister-clade to Isopoda also varied: Mysida+Amphipoda in  
298 Parsimony and both BI analyses, and Mysida in the remaining four analyses. In the isopod  
299 clade, partitioning had a major effect on the BI analysis: non-partitioned dataset resolved

300 Cymothoidae+Corallanidae at the base, followed by Phreatoicidea+Asellota. Parsimony  
301 analysis produced a similar topology, but Phreatoicidea and *G. ovalis* + *L. quadripunctata*  
302 clades switched places. The partitioned BI dataset, as well the remaining five analyses, all  
303 resolved Phreatoicidea as the basal clade. In these, the sister-group to the remaining isopods  
304 (minus Phreatoicidea) was Asellota+Cymothoidae+Corallanidae in four analyses, and Asellota  
305 in PB. Five analyses (minus PB) produced a topology of the remainder of the isopod clade  
306 that was partially congruent with the NUC-consensus topology, but instead of it being  
307 divided into Oniscidea + all other taxa, here *G. ovalis*+*L. quadripunctata* were at the base  
308 (except in Parsimony: Phreatoicidea). Oniscidea (rendered paraphyletic by *L. oceanica*) clade  
309 topology was stable in all six, but the topology of the catch-all clade exhibited a number of  
310 permutations, none of which were identical to the NUC-consensus topology.

311 PB produced the only topology (Fig. 4) with monophyletic Oniscidea, with the rogue *L.*  
312 *oceanica* at the base of the clade. Also importantly, Cymothoidae+Corallanidae clade was  
313 placed on a long branch within the catch-all clade, together with *Eurydice pulchra* (all  
314 Cymothoidea). The suborder was still rendered paraphyletic by the positions of *Bathynomus*  
315 sp. and rogue (polytomy) *G. ovalis*.

### 316 **Gene order**

317 As gene orders are unlikely to exhibit homoplasy, it has been hypothesised that they may be  
318 able to resolve difficult (deep) phylogenies in some cases (Boore, 2006), so we tested this  
319 approach. As many tRNA genes were missing or we suspected that they may be  
320 misannotated, to test for the presence of false signals, we used two datasets: one excluding  
321 all tRNAs (PCGs+rRNAs) and one (PCGs+rRNAs+tRNAs) excluding only the missing and

322 ambiguously annotated tRNAs (such as tRNAL1 and 2). The two datasets produced  
323 incongruent topologies; different runs of the PCGs+rRNAs+tRNAs dataset produced identical  
324 topologies (Fig. 5), whereas different runs of PCGs+rRNAs did not (File S2:  
325 GO\_PCGs+rRNAs\_1 and 2). Both dataset produced a number of paraphyletic major clades  
326 and largely nonsensical topologies and largely low support values; for example, the more  
327 stable, PCGs+rRNAs+tRNAs, dataset produced paraphyletic Decapoda, Stomatopoda,  
328 Isopoda, Oniscidea and Cymothoidea.

### 329 **Nuclear marker-based phylogeny (18S)**

330 To view the evolutionary history of Isopoda from a non-mitochondrial perspective, we used  
331 the nuclear *18S* gene. This approach can also help us test whether the underlying reason for  
332 the conflicting phylogenetic signals between different studies might be mitochondrial  
333 introgression, which, recent evidence shows, is more widespread than previously thought  
334 (Edwards et al., 2016; Jakovlić, Wu, Treer, Šprem, & Gui, 2013; Mallet, Besansky, & Hahn,  
335 2016). Some of the species used for mitogenomic analyses were not available, but we made  
336 sure to include representatives of all major taxa in the mitogenomic dataset (File S3). To  
337 obtain a more comparable dataset, we sequenced the *18S* gene of three parasitic  
338 Cymothoidea/Corallanidae species from the mtDNA dataset: *Cymothoa indica* (Cymothoidea;  
339 GenBank accession number MK079664), *Ichthyoxenos japonensis* (Cymothoidea; MK542857),  
340 and *Tachaea chinensis* (Corallanidae; MK542858); and an additional Cymothoidea species,  
341 *Asotana magnifica* (MK542856). We conducted a phylogenetic analysis using 55  
342 malacostracan orthologues, with SYM+R4 selected as the best-fit model. Only one sequence  
343 (non-isopod: *Gammarus troglophilus*) failed the  $\chi^2$  compositional homogeneity test. Results



344 produced by this dataset were unstable, i.e. different runs and datasets (addition and  
345 removal of some taxa) would usually produce different topologies. However, some important  
346 features were rather constant among most analyses: Asellota at the base (Limnoriidea in  
347 Parsimony, but with very low support); highly derived Cymothoidea, rendered paraphyletic by  
348 the nested Limnoriidea (monophyletic in Parsimony); and Oniscidea rendered paraphyletic  
349 by the rogue Ligiidae clade (*Ligia* sp. and *Ligidium* sp.). ML and BI analyses produced  
350 relatively congruent topologies, with Isopoda rendered paraphyletic by the Amphipoda clade  
351 nested within the large Cymothoidea clade (File S2). As PB and Parsimony analyses produced  
352 monophyletic Isopoda, with Amphipoda as the sister-clade (Fig. 6), we can confidently reject  
353 this as a compositional heterogeneity artefact. Phreatoicoidea largely clustered with the rogue  
354 Ligiidae clade, but this was not supported by the PB analysis. Cymothoidea were  
355 monophyletic only in the Parsimony analysis, and divided into two clades in all topologies: a  
356 stable monophyletic clade comprising Dajidae and Bopyridae; and a large instable (exhibiting  
357 pervasive paraphyly) clade comprising Cirolanidae, Corallanidae and Cymothoidea families,  
358 and aforementioned ‘intruders’ (Limnoriidea and Amphipoda). Corallanidae and Cirolanidae  
359 were mostly paraphyletic (somewhat erratic behaviour of *Eurydice pulchra*), whereas  
360 Cymothoidea (monophyletic) were highly derived and exhibited disproportionately long  
361 branches.

## 362 Discussion

363 Most phylogenetic reconstruction algorithms assume homogeneity in nucleotide base  
364 compositions, but mitochondrial genomes of some groups of Arthropoda exhibit

365 non-constant equilibrium nucleotide frequencies across different lineages, or compositional  
366 heterogeneity, which can produce artificial clustering in phylogenetic analysis (Hassanin,  
367 2006; Lartillot et al., 2007; Morgan et al., 2013; Talavera et al., 2011). Having observed  
368 pervasive topological instability among previous attempts to resolve the phylogeny of  
369 Isopoda, we hypothesised that their remarkably different life histories may have produced  
370 asymmetrical adaptive evolutionary pressures on their (mito)genomes, which in turn  
371 resulted in compositional heterogeneity and heterotachy that interfere with the  
372 reconstruction of their evolutionary history.

373 We tested the performance of several methodologies commonly used to account for  
374 these compositional imbalances: the use of amino acid sequences (instead of nucleotide  
375 sequences), data partitioning, and phylogenetic algorithms designed for non-homogeneous  
376 data (heterogeneous CAT-GTR and heterotachous IQ-GHOST). We also tested commonly  
377 used algorithms (ML, BI and Parsimony), and a large number of different datasets. Apart  
378 from the heterotachous GHOST model, which tended to produce results identical to the  
379 common ML analysis, all other variables produced notable impacts on the topology, with  
380 unique topologies by far outnumbering identical topologies.

381 As regards the major unresolved issue of the isopod phylogeny, the sister-clade to all  
382 other isopods (basal clade) and the monophyly of Cymothoidea, mitochondrial nucleotides  
383 (NUC) quite consistently produced Cymothoidea and Corallanidae as the basal clade, first  
384 followed by Asellota, then by Phreatoicoidea, whereas other Cymothoidea tended to be  
385 scattered throughout the central 'catch-all' clade. AAs, however, largely resolved  
386 Phreatoicoidea as the basal isopod clade, with the remaining isopods split into two

387 sister-clades: 1) Asellota + Cymothoidae/Corallanidae and 2) all remaining taxa. The  
388 Parsimony method produced Cymothoidae+Corallanidae at the base, followed by Asellota +  
389 (*G. ovalis* + *L. quadripunctata*) using both datasets. PB analysis of AAs dataset produced a  
390 remarkably different topology, with Phreatoicidea at the base, followed by Asellota, but  
391 Cymothoidae+Corallanidae were relatively derived, and Cymothoida not so deeply  
392 paraphyletic. Nuclear (*18S* gene) topology was also strongly affected by the methodology,  
393 but consistently resolved Asellota as the basal isopod clade (Limnoriidea in Parsimony), and  
394 Cymothoida as paraphyletic (nested Limnoriidea, not in Parsimony), but highly derived. Even  
395 though it appears that we did not manage to reach a conclusion, as we failed to infer a stable  
396 topology, we did manage to identify another feature of isopod mitogenomes that may help  
397 us in this quest.

#### 398 **Strand compositional bias: AT and GC skews**

399 Organellar genomes often exhibit a phenomenon known as strand asymmetry, or strand  
400 compositional bias, where positive AT skew values indicate more A than T on the strand,  
401 positive GC skews indicate more G than C, and vice versa (Reyes, Gissi, Pesole, & Saccone,  
402 1998; Wei et al., 2010). A likely cause for this is hydrolytic deamination of bases on the  
403 leading strand when it is single stranded, i.e. during replication and transcription (Bernt,  
404 Braband, Schierwater, & Stadler, 2013; Fonseca, Harris, & Posada, 2014; Reyes et al., 1998).  
405 Whereas other crustacean taxa usually exhibit positive overall AT skews for genes located on  
406 the plus strand (or majority strand) and negative GC skews for genes on the minus strand  
407 (minority strand) (Hassanin, 2006; Wei et al., 2010), isopod mitogenomes usually exhibit  
408 negative overall AT skews and positive GC skews of the majority strand (Kilpert et al., 2012;

409 Kilpert & Podsiadlowski, 2006; Yu et al., 2018). This is believed to be a consequence of an  
410 inversion of the replication origin (RO), where the changed replication order of two  
411 mitochondrial DNA strands consequently resulted in an inversed strand asymmetry (Bernt et  
412 al., 2013; Hassanin et al., 2005; Kilpert et al., 2012; Kilpert & Podsiadlowski, 2006; Wei et al.,  
413 2010).

414 It is known from before that *Asellus aquaticus* (Asellota) possesses an inversed skew in  
415 comparison to other isopod taxa (Kilpert & Podsiadlowski, 2006), but we found that the  
416 three available Cymothoidae and Corallanidae species (*C. indica*, *T. chinensis* and *I.*  
417 *japonensis*) also exhibit inversed skew patterns (Fig. 7, Table 1). As regards other studied  
418 non-isopod Malacostraca, they exhibit GC skews very similar to the isopod outliers, from  
419 -0.014 in *Metacrangonyx repens* to -0.332 in *Typhlatya miravetensis*, and mixed AT skews  
420 (negative in Mysida and Amphipoda, and mixed positive and negative in Stomatopoda and  
421 Decapoda). As intra-genomic and inter-specific variations in base composition have a strong  
422 power to bias phylogenetic analyses (Romiguier & Roux, 2017), and skew-driven LBA  
423 phylogenetic artefacts have been reported in arthropods (Hassanin, 2006; Hassanin et al.,  
424 2005) and other metazoans (Sun, Li, Kong, & Yu, 2018), we suspect that inversed skews in  
425 some isopods may produce such artefacts among the branches exhibiting similar skews.

#### 426 **Collation of evolutionary hypotheses**

427 The inversed skew in *Asellus aquaticus* led Kilpert and Podsiadlowski (Kilpert & Podsiadlowski,  
428 2006) to speculate that this clearly suggests that this taxon branched off first in the isopod  
429 phylogeny, but a few years later Kilpert et al. (Kilpert et al., 2012) noticed that the basal  
430 position of Phreatoicidea causes a conflict in explaining the inversed isopod GC skew

431 (present in *Eophreaticoicus* sp.; Fig. 4 – red stars). Our NUC dataset would mostly support a  
432 modified version of the first scenario, the replication origin inversion occurred in isopods  
433 after Cymothoidae+Corallanidae and Asellota branched off from the main isopod lineage  
434 (Figs. 1 and 2 – red star signs), whereas our AAs analyses would mostly support a scenario  
435 where the RO inversion occurred only in the common ancestor of  
436 Asellota+(Cymothoidae+Corallanidae) clade (Fig. 3). However, there is no support for either  
437 of these scenarios from nuclear (*18S*) or morphological (G D F Wilson, 2009) data, which  
438 relatively consistently indicate that Asellota (*18S*) or Asellota+Phreatoicidea (morphology)  
439 are the basal clade. Parsimony analyses also complicate these scenarios by Asellota forming  
440 a sister-clade with *G. ovalis* and *L. quadripunctata*. Importantly, our PB (heterogeneous  
441 algorithm) analysis of the AAs dataset produced an mtDNA topology that exhibited notable  
442 similarity to the *18S* and morphology-based topologies, where Cymothoidae+Corallanidae  
443 clustered with *E. pulchra* (Cirolanidae) in the relatively derived part of the isopod clade. From  
444 that, we can conclude that a combination of AAs dataset (which is expected to be less  
445 affected by skews than nucleotides) and a heterogeneous CAT-GTR model was most  
446 successful in attenuating the phylogenetic artefacts caused by compositional biases. We can  
447 therefore reject the above scenarios, and conclude that inversed skews of Asellota and  
448 Cymothoidae+Corallanidae are non-synapomorphic. The inversed skew of highly derived  
449 Cymothoidae+Corallanidae produces an LBA artefact of them clustering at the base of the  
450 isopod clade, phylogenetically close to other taxa with similar (homoplastic) skew patterns  
451 (Asellota and non-isopod Malacostraca).

452           Having established this, now we can use these results to infer the most parsimonious  
453 hypothesis for the course of events in the evolutionary history of Isopoda. First, we can  
454 reject with confidence the basal position of Cymothoidae+Corallanidae as an artefact. This  
455 indicates that the basal isopod taxon is either Asellota (G D F Wilson, 2009), Phreatoicidea (R.  
456 C. Brusca & Wilson, 1991), or Asellota+Phreatoicidea sister-clade (Dreyer & Wägele, 2001;  
457 Kilpert et al., 2012; George D.F. Wilson, 1999). The latter two scenarios are less parsimonious,  
458 as they would require at least three independent RO inversions in the evolutionary history of  
459 Isopoda (in the ancestral isopod, in Asellota, and in Cymothoidae+Corallanidae), whereas the  
460 first scenario is more parsimonious, as it requires only two (in the ancestral isopod after the  
461 split of Asellota and in Cymothoidae+Corallanidae; Fig. 6 – red stars). Additionally, the *18S*  
462 dataset relatively consistently resolved Asellota as the basal branch (disregarding  
463 paraphyletic Isopoda and Parsimony analysis). Therefore, we can tentatively conclude that  
464 multiple evidence supports the original hypothesis of Kilpert and Podsiadlowski (Kilpert &  
465 Podsiadlowski, 2006): Asellota is the oldest isopod branch and RO inversion in isopods  
466 occurred after the Asellota branched off. This scenario implies either a homoplastic nature of  
467 the inverted skews in Asellota and Cymothoidae+Corallanidae, or an introgression event  
468 from Asellota. Although the latter scenario would directly explain the phylogenetic affinity  
469 between the two taxa, the fact that PB (and especially PB+AAs) analyses managed to  
470 attenuate this artefact is a strong indication that we can reject this hypothesis, and conclude  
471 that homoplastic skews in these taxa are driven by architectural rearrangements.

472           Although this resolves the issue of the deep paraphyly of Cymothoida, i.e., places the  
473 rogue Cymothoidae+Corallanidae clade back within the remaining Cymothoida, *18S* data still

474 resolve the Cymothoida as divided into two clades (Dajidae+Bopyridae and  
475 Cirolanidae+Corallanidae+Cymothoidae), and rendered paraphyletic by the nested  
476 Limnoriidea. However, as Limnoriidea were resolved as the basal isopod taxon in the *18S*  
477 Parsimony analysis, we suspect that this is an LBA between two 'rogue' taxa exhibiting  
478 elevated evolutionary rates, and thus erratic phylogenetic behaviour:  
479 Corallanidae+Cymothoidae and Limnoriidea. The monophyly of Corallanidae is unsupported  
480 by our *18S* analyses, so it will be needed to sequence further mitogenomic (to identify skews)  
481 and nuclear molecular data for these three families. This combination of skews and nuclear  
482 data would enable us to identify the exact point in evolutionary history where the RO  
483 inversion occurred in these taxa, and infer the most parsimonious topology and/or taxonomy,  
484 i.e., the one that supports a single RO inversion (or introgression event), as opposed to those  
485 that would require multiple events.

486 As regards other unresolved issues in the phylogeny of Isopoda, our analyses further  
487 corroborate the existence of several rogue taxa that exhibit somewhat erratic topological  
488 behaviour. The position of *Ligia oceanica* (nominally Oniscidea: Ligiidae), a recognized rogue  
489 taxon (Luana S.F. Lins et al., 2017; Shen et al., 2017; G D F Wilson, 2009; Yu et al., 2018), was  
490 mostly resolved at the base of the 'catch-all' clade in mtDNA analyses, but in the (putatively)  
491 most reliable mitochondrial topology AAs+PB, it was resolved as the basal Oniscidea species.  
492 Although this is in perfect agreement with morphological data, which resolve Ligiidae as the  
493 most primitive Oniscidea clade (Schmidt, 2008), we cannot claim that this issue is fully  
494 resolved, because the entire Ligiidae family exhibited rogue behaviour in the *18S* dataset as  
495 well. Three Cymothoida taxa in the mtDNA dataset that exhibit standard isopod skews,

496 *Bathynomus* sp., *E. pulchra* (both Cirolanidae) and *G. ovalis* (Bopyridae), also exhibited rather  
497 instable topological behaviour, and we did not find support for their monophyly using the  
498 mtDNA data. Although the Cirolanidae are believed to be ancient (Wetzer, 2002) and highly  
499 plesiomorphic within this suborder (Brandt & Poore, 2003), this is not supported by the *18S*  
500 dataset. A putatively relevant observation is that all three species exhibit unique, highly  
501 rearranged, gene orders (Fig. 8). As another rogue species, *L. quadripunctata* (Limnoriidea)  
502 (Luana S.F. Lins et al., 2017; G D F Wilson, 2009; Zou et al., 2018), also exhibits a highly  
503 rearranged gene order (Lloyd et al., 2015), and as there is evidence of a close positive  
504 correlation between the mitogenomic architectural instability and the mutation rate  
505 (Hassanin, 2006; Shao, Dowton, Murrell, & Barker, 2003; Xu, Jameson, Tang, & Higgs, 2006),  
506 we hypothesise that frequent genome rearrangements may have resulted in an accelerated  
507 mutational rate in these species. In agreement with this hypothesis, *E. pulchra* and *L.*  
508 *quadripunctata* exhibited the highest evolutionary rates of all studied isopod (and decapod)  
509 mitogenomes (Shen et al., 2017). However, as *L. quadripunctata* was resolved as the basal  
510 isopod clade in one study (mitogenomic AAs dataset + BI analysis;  
511 Cymothoidae+Corallanidae unavailable at the time) (Luana S.F. Lins et al., 2017), and  
512 Limnoriidea exhibited rather erratic behaviour in our *18S* dataset, we can safely argue that  
513 mitogenomic rearrangements are unsatisfactory explanation for some of the observed  
514 phenomena. Accelerated rates of substitution in some Arthropoda were previously explained  
515 by three main factors: genomic rearrangements, including duplication of the control region  
516 and gene translocation, parasitic lifestyle, and small body size (Hassanin, 2006). We therefore  
517 hypothesise that a proportion of these phylogenetic artefacts are driven by adaptive



518 evolution, which also produces compositional biases that are interfering with phylogenetic  
519 reconstruction by producing disproportionately long branches. Furthermore, inverted  
520 mitogenomic skews also do not explain the disproportionately long branch of Cymothoidae  
521 in the *18S* dataset. We hypothesise that frequent life-history innovations in Cymothoida  
522 (Hata et al., 2017; Luana S.F. Lins et al., 2017) may be producing accelerated substitution  
523 rates in some of these taxa. Therefore, we can tentatively conclude that mitochondrial  
524 evolution in isopods is a result of interplay between adaptive and nonadaptive evolutionary  
525 pressures, where non-adaptive outweigh the adaptive in some taxa, such as Cymothoidae  
526 and Corallanidae.

527       The topology of non-isopod Malacostraca was rather instable as well, with PB producing  
528 notably different topologies from other analyses. As non-isopod Malacostraca also exhibit  
529 notable variability in skews (Table 1), we conclude that compositional heterogeneity also  
530 interfered with phylogenetic reconstruction. The most relevant question for this study is that  
531 of the sister-group to Isopoda: Mysida+Amphipoda in most of our mtNUC analyses (except  
532 PB, a unique topology), BI+AAs, and all Parsimony topologies; Mysida in most AAs analyses  
533 (ML+GHOST+PB); and Amphipoda in the PB *18S* analysis (Amphipoda were nested within the  
534 Isopoda in ML and BI *18S* topologies). As Amphipoda are considered to be the most  
535 prominent contender for this position (G D F Wilson, 2009), this again indicates that a much  
536 smaller marker in combination with the CAT-GTR model may be producing more reliable  
537 results than complete mitogenomes.

538 **Methodological implications**

539 Our findings indicate that phylogenetic reconstruction using mitochondrial data in Isopoda is  
540 severely hampered by compositional biases. This corroborates an earlier observation that in  
541 isopods mitochondrial sequence data are prone to producing artefactual LBA relationships,  
542 and thus a poor tool for phylogenetic reconstruction in this taxon (Wetzer, 2002). Intriguingly,  
543 these did not affect only the nucleotide dataset, but also the amino acid dataset. Amino acid  
544 datasets should be less affected by nonadaptive compositional biases, as nonsynonymous  
545 mutations are likely to be affected by the purifying selection (as opposed to synonymous  
546 mutations). However, it has been shown that mitochondrial strand asymmetry (skews) can  
547 have very large effects on the composition of the encoded proteins (Botero-Castro et al.,  
548 2018; Min & Hickey, 2007). Some groups of residues share similar physico-chemical  
549 properties and can be conservatively exchanged without significant functional impacts  
550 (Botero-Castro et al., 2018), and some parts of protein chains may evolve under lesser  
551 functional constraints, so many non-synonymous mutations may not affect the protein  
552 functionally. Finally, as argued above, adaptive evolutionary pressures are also likely to affect  
553 the composition of proteins in isopods.

554 All individual genes produced unique topologies, which has important implications for  
555 the interpretation of previous results inferred using single-gene datasets. This phenomenon  
556 has been observed in isopods before on a much smaller scale (Wetzer, 2002), and it is in  
557 agreement with the proposed mosaic nature of (mitochondrial) genomes, where different  
558 loci often produce conflicting phylogenetic signals (Degnan & Rosenberg, 2009; Pollard, Iyer,  
559 Moses, & Eisen, 2006; Romiguier & Roux, 2017). It should be noted that some genes

560 produced less pronounced phylogenetic artefacts, notably *cytb* and *12S* (File S2), which  
561 indicates that these two genes might be evolving under a very strong purifying selection. The  
562 latter gene (*12S*) produced a topology that exhibited remarkable congruence with the  
563 nuclear *18S* topology, especially in placing Cymothoidae+Corallanidae in the derived part of  
564 the clade. Although this corroborates the observation that some genes produce less biased  
565 phylogenies than others (Romiguier, Ranwez, Delsuc, Galtier, & Douzery, 2013), the artefact  
566 of Asellota clustering within the derived Cymothoida clade shows that compositional biases  
567 affected this dataset as well, and that we can safely conclude that single-gene mitochondrial  
568 markers are not a suitable tool for this task. Similarly, gene orders produced topological  
569 instability, very low support, and almost nonsensical topologies, with paraphyletic Isopoda.  
570 As highly rearranged gene orders were at the base of the isopod clade, we hypothesise that  
571 the discontinuous evolution of mitogenomic architecture evolution (Zou et al., 2017)  
572 produces phylogenetic artefacts, such as LBA. This corroborates the hypothesis that gene  
573 orders are not a useful phylogenetic marker in lineages exhibiting destabilised mitogenomic  
574 architecture (Zhang et al., 2017; Zou et al., 2017).

575 All of the tested standard models (BI, ML and Parsimony) were very sensitive to  
576 compositional biases, and produced highly misleading artefacts. We also tested the  
577 performance of a new (experimental) GHOST heterotachous model (Crotty et al., 2017), but  
578 we found that it produces results almost identical to the common ML algorithm, so we  
579 conclude that on this dataset the model appears to be largely useless. Importantly, as  
580 regards the aforementioned unresolved feud about the most suitable methodological  
581 approach to account for compositional heterogeneity (Feuda et al., 2017; Whelan &

582 Halanych, 2017), our results indicate that (in isopods) the CAT-GTR model by far outperforms  
583 the partitioning (assigning different evolutionary models to different partitions). Although  
584 we discourage the use of mitochondrial data as a tool for phylogenetic reconstruction in  
585 isopods, there are other available methodological approaches designed to account for this  
586 problem (Hassanin, 2006; Richards, Brown, Barley, Chong, & Thomson, 2018; Sheffield et al.,  
587 2009; Yang, Li, Dang, & Bu, 2018), so future studies may attempt to test their performance.

588

## 589 **Conclusions**

590 With respect to our working hypothesis, we can accept the first part of it: asymmetrical  
591 mutational pressures generate compositional heterogeneity in isopod mitogenomes and  
592 interfere with phylogenetic reconstruction. However, we were mistaken in assuming that  
593 these mutational pressures are primarily adaptive, i.e., caused by their radically diverse life  
594 histories. Our results imply that mitochondrial evolution in isopods is a result of interplay  
595 between adaptive and non-adaptive evolutionary pressures, where non-adaptive outweigh  
596 the adaptive in some taxa (Cymothoidae and Corallanidae). This is in agreement with a  
597 recent observation that mitogenomes in isopods mutate at a rate independent of life history  
598 traits (Saclier et al., 2018), and contributes to our understanding of the interplay of adaptive  
599 and nonadaptive processes in shaping the mitochondrial genomes of Metazoa (Bernt et al.,  
600 2013; Smith, 2016). We can conclude that mitogenomic architectural instability (comprising  
601 RO inversions) generates strong compositional biases that render mitogenomic sequence  
602 data a very poor tool for phylogenetic reconstruction in Isopoda. The deeply contrasting

603 phylogenetic signals that we identified, not only between nuclear and mitochondrial  
604 datasets, but also among different mitogenomic datasets, have important implications both  
605 for the interpretation of past studies and for scientists who plan to study the phylogeny of  
606 these taxa in the future. Regardless of this, simply by rejecting the previous contradictory  
607 hypotheses inferred using mitochondrial data, we managed to at least partially resolve  
608 several contentious issues in the phylogeny of Isopoda. As regards the methodological  
609 approaches used here to account for compositional heterogeneity, we can conclude that  
610 none of the tools managed to fully resolve these biases, but CAT-GTR algorithm  
611 outperformed partitioning, and best results were achieved by combining it with the amino  
612 acids dataset. Although we discourage the use of mitochondrial data for this purpose, any  
613 future study that would aim to rely (even if partially) on mitogenomic data would have to  
614 first unambiguously prove that they used tools that successfully account for it. As mtDNA  
615 data have played a major role in our current understanding of the evolutionary history of life  
616 on Earth (Rubinoff et al., 2005), implications of this study are much broader than its original  
617 scope. As our findings show that architectural rearrangements can produce major  
618 compositional biases even on short evolutionary timescales, the implications of this study  
619 are that proving the suitability of data via GC and AT skew analyses should be a prerequisite  
620 for every study that aims to use mitochondrial data for phylogenetic reconstruction, even  
621 among closely related taxa. These findings should not discourage scientists from sequencing  
622 further isopod mitogenomes, as their architectural hypervariability still makes them a useful  
623 tool for unravelling the conundrums of evolution of mitochondrial architecture, and as

624 mitochondrial skews can be used as an additional phylogenetic tool to infer the most  
625 parsimonious phylogenetic hypotheses.

626

627

## 628 **Acknowledgements**

629 This work was supported by the Earmarked Fund for China Agriculture Research System  
630 (CARS-45-15); the National Natural Science Foundation of China (31872604, 31572658); and  
631 the Deanship of Scientific Research at King Saud University (RGP 1435-012). The funders had  
632 no role in the design of the study, collection, analysis and interpretation of data, and in  
633 writing the manuscript. The authors declare that they have no conflict of interest. The  
634 authors would like to express their sincere appreciation to Chen Rong (Bio-Transduction Lab)  
635 for helping us to conduct some of the wet lab experiments, and the Deanship of Scientific  
636 Research at King Saud University for funding this research.

## 637 **References**

- 638 Almeida, D., Maldonado, E., Vasconcelos, V., & Antunes, A. (2015). Adaptation of the  
639 mitochondrial genome in cephalopods: Enhancing proton translocation channels and  
640 the subunit interactions. *PLoS ONE*, *10*(8), 1–29. doi: 10.1371/journal.pone.0135405
- 641 Baele, G., Raes, J., Van De Peer, Y., & Vansteelandt, S. (2006). An improved statistical method  
642 for detecting heterotachy in nucleotide sequences. *Molecular Biology and Evolution*,  
643 *23*(7), 1397–1405. doi: 10.1093/molbev/msl006
- 644 Ballard, J. W. O., & Whitlock, M. C. (2004). The incomplete natural history of mitochondria.  
645 *Molecular Ecology*, *13*(4), 729–744. doi: 10.1046/j.1365-294X.2003.02063.x
- 646 Bernt, M., Braband, A., Schierwater, B., & Stadler, P. F. (2013). Genetic aspects of  
647 mitochondrial genome evolution. *Molecular Phylogenetics and Evolution*, *69*(2),  
648 328–338. doi: 10.1016/j.ympev.2012.10.020

- 649 Boore, J. L. (2006). The use of genome-level characters for phylogenetic reconstruction.  
650 *Trends in Ecology and Evolution*, 21(8), 439–446. doi: 10.1016/j.tree.2006.05.009
- 651 Botero-Castro, F., Tilak, M.-K., Justy, F., Catzeflis, F., Delsuc, F., & Douzery, E. J. P. (2018). In  
652 cold blood: compositional bias and positive selection drive the high evolutionary rate  
653 of vampire bats mitochondrial genomes. *Genome Biology and Evolution*. doi:  
654 10.1093/gbe/evy120
- 655 Bourguignon, T., Tang, Q., Ho, S. Y. W., Juna, F., Wang, Z., Arab, D. A., ... Lo, N. (2018).  
656 Transoceanic Dispersal and Plate Tectonics Shaped Global Cockroach Distributions:  
657 Evidence from Mitochondrial Phylogenomics. *Molecular Biology and Evolution*, 35(4),  
658 970–983.
- 659 Brandt, A., & Poore, G. C. B. (2003). Higher classification of the flabelliferan and related  
660 Isopoda based on a reappraisal of relationships. *Invertebrate Systematics*, 17(6),  
661 893–923. doi: 10.1071/ISO2032
- 662 Broly, P., Deville, P., & Maillet, S. (2013). The origin of terrestrial isopods (Crustacea: Isopoda:  
663 Oniscidea). *Evolutionary Ecology*, 27(3), 461–476.
- 664 Brusca, R. C., & Wilson, G. D. F. (1991). A phylogenetic analysis of the Isopoda with some  
665 classificatory recommendations. *Memoirs of the Queensland Museum*, 31, 143–204.  
666 Retrieved from <http://www.vliz.be/en/imis?module=ref&refid=140503>
- 667 Brusca, Richard C. (1981). A monograph on the Isopoda Cymothoidae (Crustacea) of the  
668 eastern Pacific. *Zoological Journal of the Linnean Society*, 73(2), 117–199. doi:  
669 10.1111/j.1096-3642.1981.tb01592.x
- 670 Cameron, S. L. (2014). Insect mitochondrial genomics: implications for evolution and  
671 phylogeny. *Annu Rev Entomol*, 59, 95–117. doi:  
672 10.1146/annurev-ento-011613-162007
- 673 Castresana, J. (2000). Selection of Conserved Blocks from Multiple Alignments for Their Use  
674 in Phylogenetic Analysis. *Molecular Biology and Evolution*, 17(4), 540–552. doi:  
675 10.1093/oxfordjournals.molbev.a026334
- 676 Costello, M. J., Bouchet, P., Boxshall, G., Fauchald, K., Gordon, D., Hoeksema, B. W., ...  
677 Appeltans, W. (2013). Global Coordination and Standardisation in Marine  
678 Biodiversity through the World Register of Marine Species (WoRMS) and Related  
679 Databases. *PLOS ONE*, 8(1), e51629. doi: 10.1371/journal.pone.0051629
- 680 Crotty, S. M., Minh, B. Q., Bean, N. G., Holland, B. R., Tuke, J., Jermiin, L. S., & Haeseler, A. von.  
681 (2017). GHOST: Recovering Historical Signal from Heterotachously-evolved Sequence  
682 Alignments. *BioRxiv*. doi: 10.1101/174789
- 683 Degnan, J. H., & Rosenberg, N. A. (2009). Gene tree discordance, phylogenetic inference and  
684 the multispecies coalescent. *Trends in Ecology & Evolution*, 24(6), 332–340. doi:  
685 10.1016/j.tree.2009.01.009
- 686 Der Sarkissian, C., Vilstrup, J. T., Schubert, M., Seguin-Orlando, A., Eme, D., Weinstock, J., ...  
687 Orlando, L. (2015). Mitochondrial genomes reveal the extinct Hippidion as an  
688 outgroup to all living equids. *Biology Letters*, 11(3), 20141058. doi:  
689 10.1098/rsbl.2014.1058

- 690 Dreyer, H., & Wägele, J.-W. (2001). Parasites of crustaceans (Isopoda: Bopyridae) evolved  
691 from fish parasites: Molecular and morphological evidence. *Zoology*, *103*(January  
692 2001), 157–178. doi: 0944-2006/01/103/03-04-157
- 693 Edwards, S. V., Potter, S., Schmitt, C. J., Bragg, J. G., & Moritz, C. (2016). Reticulation,  
694 divergence, and the phylogeography–phylogenetics continuum. *Proceedings of the  
695 National Academy of Sciences*, *113*(29), 8025–8032. doi: 10.1073/pnas.1601066113
- 696 Feuda, R., Dohrmann, M., Pett, W., Philippe, H., Rota-Stabelli, O., Lartillot, N., ... Pisani, D.  
697 (2017). Improved Modeling of Compositional Heterogeneity Supports Sponges as  
698 Sister to All Other Animals. *Current Biology*, *27*(24), p3864-3870.e4. doi:  
699 10.1016/j.cub.2017.11.008
- 700 Fonseca, M. M., Harris, D. J., & Posada, D. (2014). The Inversion of the Control Region in  
701 Three Mitogenomes Provides Further Evidence for an Asymmetric Model of  
702 Vertebrate mtDNA Replication. *PLOS ONE*, *9*(9), e106654. doi:  
703 10.1371/journal.pone.0106654
- 704 Gawryluk, R. M. R., Kamikawa, R., Stairs, C. W., Silberman, J. D., Brown, M. W., & Roger, A. J.  
705 (2016). The Earliest Stages of Mitochondrial Adaptation to Low Oxygen Revealed in a  
706 Novel Rhizarian. *Current Biology*, *26*(20), 2729–2738. doi:  
707 10.1016/j.CUB.2016.08.025
- 708 Grechko, V. V. (2013). The problems of molecular phylogenetics with the example of  
709 squamate reptiles: Mitochondrial DNA markers. *Molecular Biology*, *47*(1), 55–74. doi:  
710 10.1134/S0026893313010056
- 711 Hassanin, A. (2006). Phylogeny of Arthropoda inferred from mitochondrial sequences:  
712 Strategies for limiting the misleading effects of multiple changes in pattern and rates  
713 of substitution. *Molecular Phylogenetics and Evolution*, *38*(1), 100–116. doi:  
714 10.1016/j.ympev.2005.09.012
- 715 Hassanin, A., Léger, N., & Deutsch, J. (2005). Evidence for multiple reversals of asymmetric  
716 mutational constraints during the evolution of the mitochondrial genome of metazoa,  
717 and consequences for phylogenetic inferences. *Systematic Biology*, *54*(2), 277–298.  
718 doi: 10.1080/10635150590947843
- 719 Hassanin, A., Ropiquet, A., Couloux, A., & Cruaud, C. (2009). Evolution of the mitochondrial  
720 genome in mammals living at high altitude: New insights from a study of the tribe  
721 Caprini (Bovidae, Antilopinae). *Journal of Molecular Evolution*, *68*(4), 293–310. doi:  
722 10.1007/s00239-009-9208-7
- 723 Hata, H., Sogabe, A., Tada, S., Nishimoto, R., Nakano, R., Kohya, N., ... Kawanishi, R. (2017).  
724 Molecular phylogeny of obligate fish parasites of the family Cymothoidae (Isopoda,  
725 Crustacea): evolution of the attachment mode to host fish and the habitat shift from  
726 saline water to freshwater. *Marine Biology*, *164*(5). doi: 10.1007/s00227-017-3138-5
- 727 Hu, F., Lin, Y., & Tang, J. (2014). MLGO: phylogeny reconstruction and ancestral inference  
728 from gene-order data. *BMC Bioinformatics*, *15*(1), 354. doi:  
729 10.1186/s12859-014-0354-6
- 730 Hua, C. J., Li, W. X., Zhang, D., Zou, H., Li, M., Jakovlić, I., ... Wang, G. T. (2018). Basal position  
731 of two new complete mitochondrial genomes of parasitic Cymothoida (Crustacea:



- 732 Isopoda) challenges the monophyly of the suborder and phylogeny of the entire  
733 order. *Parasites & Vectors*, 11(1), 628. doi: 10.1186/s13071-018-3162-4
- 734 Jakovlić, I., Wu, Q.-J., Treer, T., Šprem, N., & Gui, J.-F. (2013). Introgression evidence and  
735 phylogenetic relationships among three (Para)Misgurnus species as revealed by  
736 mitochondrial and nuclear DNA markers. *Archives of Biological Sciences*, 65(4),  
737 1463–1467. doi: 10.2298/ABS1304463J
- 738 Joca, L. K., Leray, V. L., Zigler, K. S., & Brusca, R. C. (2015). A new host and reproduction at a  
739 small size for the “snapper-choking isopod” *Cymothoa excisa* (Isopoda:  
740 Cymothoidae). *Journal of Crustacean Biology*, 35(2), 292–294. doi:  
741 10.1163/1937240X-00002312
- 742 Jones, C. M., Miller, T. L., Grutter, A. S., & Cribb, T. H. (2008). Natatory-stage cymothoid  
743 isopods: Description, molecular identification and evolution of attachment.  
744 *International Journal for Parasitology*, 38(3–4), 477–491. doi:  
745 10.1016/j.ijpara.2007.07.013
- 746 Kalyaanamoorthy, S., Minh, B. Q., Wong, T. K. F., Von Haeseler, A., & Jermini, L. S. (2017).  
747 ModelFinder: Fast model selection for accurate phylogenetic estimates. *Nature*  
748 *Methods*, 14(6), 587–589. doi: 10.1038/nmeth.4285
- 749 Katoh, K., & Standley, D. M. (2013). MAFFT multiple sequence alignment software version 7:  
750 Improvements in performance and usability. *Molecular Biology and Evolution*, 30(4),  
751 772–780. doi: 10.1093/molbev/mst010
- 752 Katoh, K., & Toh, H. (2008). Improved accuracy of multiple ncRNA alignment by incorporating  
753 structural information into a MAFFT-based framework. *BMC Bioinformatics*, 9(1),  
754 212. doi: 10.1186/1471-2105-9-212
- 755 Ketmaier, V., Joyce, D. A., Horton, T., & Mariani, S. (2008). A molecular phylogenetic  
756 framework for the evolution of parasitic strategies in cymothoid isopods (Crustacea).  
757 *Journal of Zoological Systematics and Evolutionary Research*, 46(1), 19–23. doi:  
758 10.1111/j.1439-0469.2007.00423.x
- 759 Kilpert, F., Held, C., & Podsiadlowski, L. (2012). Multiple rearrangements in mitochondrial  
760 genomes of Isopoda and phylogenetic implications. *Molecular Phylogenetics and*  
761 *Evolution*, 64(1), 106–117. doi: 10.1016/j.ympev.2012.03.013
- 762 Kilpert, F., & Podsiadlowski, L. (2006). The complete mitochondrial genome of the common  
763 sea slater, *Ligia oceanica* (Crustacea, Isopoda) bears a novel gene order and unusual  
764 control region features. *BMC Genomics*, 7, 241. doi: 10.1186/1471-2164-7-241
- 765 Kolaczkowski, B., & Thornton, J. W. (2004). Performance of maximum parsimony and  
766 likelihood phylogenetics when evolution is heterogeneous. *Nature*, 431, 980.
- 767 Krell, F.-T., & Cranston, P. S. (2004). Which side of the tree is more basal? *Systematic*  
768 *Entomology*, 29, 279–281. doi: 10.1111/j.0307-6970.2004.00262.x
- 769 Lan, T., Gill, S., Bellemain, E., Bischof, R., Nawaz, M. A., & Lindqvist, C. (2017). Evolutionary  
770 history of enigmatic bears in the Tibetan Plateau-Himalaya region and the identity of  
771 the yeti. *Proceedings of the Royal Society B: Biological Sciences*, 284(1868),  
772 20171804. doi: 10.1098/rspb.2017.1804

- 773 Lanfear, R., Calcott, B., Ho, S. Y. W., & Guindon, S. (2012). PartitionFinder: Combined  
774 Selection of Partitioning Schemes and Substitution Models for Phylogenetic Analyses.  
775 *Molecular Biology and Evolution*, 29(6), 1695–1701. doi: 10.1093/molbev/mss020
- 776 Lartillot, N., Brinkmann, H., & Philippe, H. (2007). Suppression of long-branch attraction  
777 artefacts in the animal phylogeny using a site-heterogeneous model. *BMC*  
778 *Evolutionary Biology*, 7(Suppl 1), S4. doi: 10.1186/1471-2148-7-S1-S4
- 779 Laslett, D., & Canbäck, B. (2008). ARWEN: A program to detect tRNA genes in metazoan  
780 mitochondrial nucleotide sequences. *Bioinformatics*, 24(2), 172–175. doi:  
781 10.1093/bioinformatics/btm573
- 782 Lavrov, D. V, Boore, J. L., & Brown, W. M. (2000). The complete mitochondrial DNA sequence  
783 of the horseshoe crab *Limulus polyphemus*. *Molecular Biology and Evolution*, 17(5),  
784 813–824.
- 785 Letunic, I., & Bork, P. (2007). Interactive Tree Of Life (iTOL): An online tool for phylogenetic  
786 tree display and annotation. *Bioinformatics*, 23(1), 127–128. doi:  
787 10.1093/bioinformatics/btl529
- 788 Li, H., Leavengood, J. M., Chapman, E. G., Burkhardt, D., Song, F., Jiang, P., ... Cai, W. (2017).  
789 Mitochondrial phylogenomics of Hemiptera reveals adaptive innovations driving the  
790 diversification of true bugs. *Proceedings of the Royal Society B: Biological Sciences*,  
791 284(1862). doi: 10.1098/rspb.2017.1223
- 792 Lins, L. S. F., Ho, S. Y. W., Wilson, G. D. F., & Lo, N. (2012). Evidence for Permo-Triassic  
793 colonization of the deep sea by isopods. *Biology Letters*, 8(6), 979–982. doi:  
794 10.1098/rsbl.2012.0774
- 795 Lins, Luana S.F., Ho, S. Y. W., & Lo, N. (2017). An evolutionary timescale for terrestrial isopods  
796 and a lack of molecular support for the monophyly of Oniscidea (Crustacea: Isopoda).  
797 *Organisms Diversity and Evolution*, 17(4), 813–820. doi: 10.1007/s13127-017-0346-2
- 798 Liu, F.-F., Li, Y.-P., Jakovlić, I., & Yuan, X.-Q. (2017). Tandem duplication of two tRNA genes in  
799 the mitochondrial genome of *Tagiades vajuna* (Lepidoptera: HesperIIDae). *European*  
800 *Journal of Entomology*, 114(1), 407–415. doi: 10.14411/eje.2017.052
- 801 Lloyd, R. E., Streeter, S., Foster, P. G., Littlewood, D. T. J., Huntley, J., Beckham, G. T., ... Cragg,  
802 S. M. (2015). The complete mitochondrial genome of *Limnoria quadripunctata*  
803 Holthuis (Isopoda Limnoriidae). *Mitochondrial DNA*, 26(6), 825–826.
- 804 Lopez, P., Casane, D., & Philippe, H. (2002). Heterotachy, an important process of protein  
805 evolution. *Molecular Biology and Evolution*, 19(1), 1–7. doi:  
806 10.1093/oxfordjournals.molbev.a003973
- 807 Maddock, S. T., Briscoe, A. G., Wilkinson, M., Waeschenbach, A., San Mauro, D., Day, J. J., ...  
808 Gower, D. J. (2016). Next-generation mitogenomics: A comparison of approaches  
809 applied to caecilian amphibian phylogeny. *PLoS ONE*, 11(6), e0156757. doi:  
810 10.1371/journal.pone.0156757
- 811 Mallet, J., Besansky, N., & Hahn, M. W. (2016). How reticulated are species? *BioEssays*, 38(2),  
812 140–149. doi: 10.1002/bies.201500149
- 813 Martin, M. B., Bruce, N. L., & Nowak, B. F. (2016). Review of the fish-parasitic genus  
814 *Cymothoa* Fabricius, 1793 (Crustacea: Isopoda: Cymothoidae) from Australia.  
815 *Zootaxa*, 4119(1), 1–72. doi: 10.11646/zootaxa.4119.1.1

- 816 Meiklejohn, K. A., Danielson, M. J., Faircloth, B. C., Glenn, T. C., Braun, E. L., & Kimball, R. T.  
817 (2014). Incongruence among different mitochondrial regions: a case study using  
818 complete mitogenomes. *Molecular Phylogenetics and Evolution*, *78*, 314–323. doi:  
819 10.1016/j.ympev.2014.06.003
- 820 Miller, M. A., Pfeiffer, W., & Schwartz, T. (2010). Creating the CIPRES Science Gateway for  
821 inference of large phylogenetic trees. *2010 Gateway Computing Environments*  
822 *Workshop, GCE 2010*. doi: 10.1109/GCE.2010.5676129
- 823 Min, X. J., & Hickey, D. A. (2007). DNA asymmetric strand bias affects the amino acid  
824 composition of mitochondrial proteins. *DNA Research: An International Journal for*  
825 *Rapid Publication of Reports on Genes and Genomes*, *14*(5), 201–206. doi:  
826 10.1093/dnares/dsm019
- 827 Mishmar, D., Ruiz-Pesini, E., Golik, P., Macaulay, V., Clark, A. G., Hosseini, S., ... Wallace, D. C.  
828 (2003). Natural selection shaped regional mtDNA variation in humans. *Proceedings*  
829 *of the National Academy of Sciences*, *100*(1), 171–176. doi:  
830 10.1073/pnas.0136972100
- 831 Morgan, C. C., Foster, P. G., Webb, A. E., Pisani, D., Mclnerney, J. O., & O’Connell, M. J. (2013).  
832 Heterogeneous models place the root of the placental mammal phylogeny.  
833 *Molecular Biology and Evolution*, *30*(9), 2145–2156. doi: 10.1093/molbev/mst117
- 834 Nie, R. E., Breeschoten, T., Timmermans, M. J. T. N., Nadein, K., Xue, H. J., Bai, M., ... Vogler, A.  
835 P. (2018). The phylogeny of Galerucinae (Coleoptera: Chrysomelidae) and the  
836 performance of mitochondrial genomes in phylogenetic inference compared to  
837 nuclear rRNA genes. *Cladistics*, *34*(2), 113–130. doi: 10.1111/cla.12196
- 838 Phillips, M., McLenachan, P., Down, C., Gibb, G., & Penny, D. (2006). Combined mitochondrial  
839 and nuclear DNA sequences resolve the interrelations of the major Australasian  
840 marsupial radiations. *Systematic Biology*, *55*(1), 122–137. doi:  
841 10.1080/10635150500481614
- 842 Pollard, D. A., Iyer, V. N., Moses, A. M., & Eisen, M. B. (2006). Widespread discordance of  
843 gene trees with species tree in *Drosophila*: evidence for incomplete lineage sorting.  
844 *PLoS Genetics*, *2*(10), e173. doi: 10.1371/journal.pgen.0020173
- 845 Poore, G. C. B., & Bruce, N. L. (2012). Global Diversity of Marine Isopods (Except Asellota and  
846 Crustacean Symbionts). *PLoS ONE*, *7*(8), e43529. doi: 10.1371/journal.pone.0043529
- 847 Reyes, A., Gissi, C., Pesole, G., & Saccone, C. (1998). Asymmetrical directional mutation  
848 pressure in the mitochondrial genome of mammals. *Molecular Biology and Evolution*,  
849 *15*(8), 957–966. doi: 10.1093/oxfordjournals.molbev.a026011
- 850 Richards, E. J., Brown, J. M., Barley, A. J., Chong, R. A., & Thomson, R. C. (2018). Variation  
851 across mitochondrial gene trees provides evidence for systematic error: How much  
852 gene tree variation is biological? *Systematic Biology*. doi: 10.1093/sysbio/syy013
- 853 Romiguier, J., Ranwez, V., Delsuc, F., Galtier, N., & Douzery, E. J. P. (2013). Less Is More in  
854 Mammalian Phylogenomics: AT-Rich Genes Minimize Tree Conflicts and Unravel the  
855 Root of Placental Mammals. *Molecular Biology and Evolution*, *30*(9), 2134–2144. doi:  
856 10.1093/molbev/mst116
- 857 Romiguier, J., & Roux, C. (2017). Analytical Biases Associated with GC-Content in Molecular  
858 Evolution. *Frontiers in Genetics*, *8*. doi: 10.3389/fgene.2017.00016

- 859 Ronquist, F., Teslenko, M., Van Der Mark, P., Ayres, D. L., Darling, A., Höhna, S., ...  
860 Huelsenbeck, J. P. (2012). Mrbayes 3.2: Efficient bayesian phylogenetic inference and  
861 model choice across a large model space. *Systematic Biology*, 61(3), 539–542. doi:  
862 10.1093/sysbio/sys029
- 863 Rubinoff, D., Holland, B. S., & Savolainen, V. (2005). Between Two Extremes: Mitochondrial  
864 DNA is neither the Panacea nor the Nemesis of Phylogenetic and Taxonomic  
865 Inference. *Systematic Biology*, 54(6), 952–961. doi: 10.1080/10635150500234674
- 866 Rudy, J., Rendoš, M., Luptáčík, P., & Mock, A. (2018). Terrestrial isopods associated with  
867 shallow underground of forested scree slopes in the Western Carpathians (Slovakia).  
868 *ZooKeys*, 801, 323–335. doi: 10.3897/zookeys.801.24113
- 869 Saclier, N., François, C. M., Konecny-Dupré, L., Lartillot, N., Guéguen, L., Duret, L., ... Lefébure,  
870 T. (2018). Life history traits impact the nuclear rate of substitution but not the  
871 mitochondrial rate in isopods. *Molecular Biology and Evolution*, msy184–msy184.
- 872 Schmidt, C. (2008). Phylogeny of the terrestrial Isopoda (Oniscidea): a review. *Arthropod*  
873 *Systematics & Phylogeny*, 66(2), 191–226.
- 874 Scott, G. R., Schulte, P. M., Egginton, S., Scott, A. L. M., Richards, J. G., & Milsom, W. K. (2011).  
875 Molecular Evolution of Cytochrome c Oxidase Underlies High-Altitude Adaptation in  
876 the Bar-Headed Goose. *Molecular Biology and Evolution*, 28(1), 351–363. doi:  
877 10.1093/molbev/msq205
- 878 Shao, R., Downton, M., Murrell, A., & Barker, S. C. (2003). Rates of Gene Rearrangement and  
879 Nucleotide Substitution Are Correlated in the Mitochondrial Genomes of Insects.  
880 *Molecular Biology and Evolution*, 20(10), 1612–1619. doi: 10.1093/molbev/msg176
- 881 Sheffield, N. C., Song, H., Cameron, S. L., & Whiting, M. F. (2009). Nonstationary evolution  
882 and compositional heterogeneity in beetle mitochondrial phylogenomics. *Systematic*  
883 *Biology*, 58(4), 381–394. doi: 10.1093/sysbio/syp037
- 884 Shen, Y., Kou, Q., Zhong, Z., Li, X., He, L., He, S., & Gan, X. (2017). The first complete  
885 mitogenome of the South China deep-sea giant isopod *Bathynomus* sp. (Crustacea:  
886 Isopoda: Cirolanidae) allows insights into the early mitogenomic evolution of isopods.  
887 *Ecology and Evolution*, 7(6), 1869–1881. doi: 10.1002/ece3.2737
- 888 Smith, D. R. (2016). The mutational hazard hypothesis of organelle genome evolution: 10  
889 years on. *Molecular Ecology*, 25, 3769–3755. doi: 10.1111/mec.13742
- 890 Sun, S., Li, Q., Kong, L., & Yu, H. (2018). Multiple reversals of strand asymmetry in molluscs  
891 mitochondrial genomes, and consequences for phylogenetic inferences. *Molecular*  
892 *Phylogenetics and Evolution*, 118, 222–231. doi: 10.1016/J.YMPEV.2017.10.009
- 893 Swofford, D. L. (2002). PAUP. Phylogenetic analysis using parsimony (and other methods)  
894 (Version 4.0). Sunderland, MA, USA: Sinauer Associates.
- 895 Talavera, G., & Castresana, J. (2007). Improvement of phylogenies after removing divergent  
896 and ambiguously aligned blocks from protein sequence alignments. *Systematic*  
897 *Biology*, 56(4), 564–577. doi: 10.1080/10635150701472164
- 898 Talavera, G., Vila, R., Igea, J., Castresana, J., Nakano, H., Poustka, A., ... Manuel, M. (2011).  
899 What is the phylogenetic signal limit from mitogenomes? The reconciliation between  
900 mitochondrial and nuclear data in the Insecta class phylogeny. *BMC Evolutionary*  
901 *Biology*, 11(1), 315. doi: 10.1186/1471-2148-11-315

- 902 Thomas, J. M., Horspool, D., Brown, G., Tcherepanov, V., & Upton, C. (2007). GraphDNA: a  
903 Java program for graphical display of DNA composition analyses. *BMC Bioinformatics*,  
904 8, 21. doi: 10.1186/1471-2105-8-21
- 905 Trifinopoulos, J., Nguyen, L. T., von Haeseler, A., & Minh, B. Q. (2016). W-IQ-TREE: a fast  
906 online phylogenetic tool for maximum likelihood analysis. *Nucleic Acids Research*,  
907 44(W1), W232–W235. doi: 10.1093/nar/gkw256
- 908 Wei, S. J., Shi, M., Chen, X. X., Sharkey, M. J., van Achterberg, C., Ye, G. Y., & He, J. H. (2010).  
909 New views on strand asymmetry in insect mitochondrial genomes. *PLoS ONE*, 5(9),  
910 1–10. doi: 10.1371/journal.pone.0012708
- 911 Wetzer, R. (2002). Mitochondrial genes and isopod phylogeny (Peracarida: Isopoda). *Journal*  
912 *of Crustacean Biology*, 22(1), 1–14. doi: 10.2307/1549602
- 913 Wetzer, R., Pérez-Losada, M., & Bruce, N. (2013). Phylogenetic relationships of the family  
914 Sphaeromatidae Latreille, 1825 (Crustacea: Peracarida: Isopoda) within  
915 Sphaeromatidea based on 18S-rDNA molecular data. *Zootaxa*, 3599(2), 161–177.
- 916 Whelan, N. V., & Halanych, K. M. (2017). Who let the CAT out of the bag? Accurately dealing  
917 with substitutional heterogeneity in phylogenomic analyses. *Systematic Biology*,  
918 66(2), 232–255. doi: 10.1093/sysbio/syw084
- 919 Willis, S. C. (2017). One species or four? Yes!...and, no. Or, arbitrary assignment of lineages to  
920 species obscures the diversification processes of Neotropical fishes. *PLoS ONE*, 12(2),  
921 e0172349. doi: 10.1371/journal.pone.0172349
- 922 Wilson, G D F. (2009). The phylogenetic position of the Isopoda in the Peracarida (Crustacea:  
923 Malacostraca). *Arthropod Systematics & Phylogeny*, 67(2), 159–198.
- 924 Wilson, George D.F. (1999). Some of the deep-sea fauna is ancient. *Crustaceana*, 72(8),  
925 1019–1030. doi: 10.1163/156854099503915
- 926 Wilson, George D.F. (2008). Global diversity of Isopod crustaceans (Crustacea; Isopoda) in  
927 freshwater. *Hydrobiologia*, Vol. 595, pp. 231–240. doi: 10.1007/s10750-007-9019-z
- 928 Wolff, J. N., Ladoukakis, E. D., Enríquez, J. A., & Dowling, D. K. (2014). Mitonuclear  
929 interactions: evolutionary consequences over multiple biological scales.  
930 *Philosophical Transactions of the Royal Society B: Biological Sciences*, 369(1646).
- 931 Xu, W., Jameson, D., Tang, B., & Higgs, P. G. (2006). The relationship between the rate of  
932 molecular evolution and the rate of genome rearrangement in animal mitochondrial  
933 genomes. *Journal of Molecular Evolution*, 63(3), 375–392. doi:  
934 10.1007/s00239-005-0246-5
- 935 Yang, H., Li, T., Dang, K., & Bu, W. (2018). Compositional and mutational rate heterogeneity in  
936 mitochondrial genomes and its effect on the phylogenetic inferences of  
937 Cimicomorpha (Hemiptera: Heteroptera). *BMC Genomics*, 19(1), 264. doi:  
938 10.1186/s12864-018-4650-9
- 939 Yu, J., An, J., Li, Y., & Boyko, C. B. (2018). The first complete mitochondrial genome of a  
940 parasitic isopod supports Epicaridea Latreille, 1825 as a suborder and reveals the less  
941 conservative genome of isopods. *Systematic Parasitology*. doi:  
942 10.1007/s11230-018-9792-2
- 943 Zhang, D., Gao, F., Li, W. X., Jakovlić, I., Zou, H., Zhang, J., & Wang, G. T. (2018). PhyloSuite: an  
944 integrated and scalable desktop platform for streamlined molecular sequence data

- 945 management and evolutionary phylogenetics studies. *BioRxiv*, 489088. doi:  
946 10.1101/489088
- 947 Zhang, D., Zou, H., Wu, S. G., Li, M., Jakovlić, I., Zhang, J., ... Li, W. X. (2017). Sequencing of the  
948 complete mitochondrial genome of a fish-parasitic flatworm *Paratetraonchoides*  
949 *inermis* (Platyhelminthes: Monogenea): tRNA gene arrangement reshuffling and  
950 implications for phylogeny. *Parasites & Vectors*, 10(1), 462. doi:  
951 10.1186/s13071-017-2404-1
- 952 Zhong, B., Deusch, O., Goremykin, V. V, Penny, D., Biggs, P. J., Atherton, R. A., ... Lockhart, P. J.  
953 (2011). Systematic Error in Seed Plant Phylogenomics. *Genome Biology and Evolution*,  
954 3, 1340–1348. doi: 10.1093/gbe/evr105
- 955 Zou, H., Jakovlić, I., Chen, R., Zhang, D., Zhang, J., Li, W.-X., & Wang, G.-T. (2017). The  
956 complete mitochondrial genome of parasitic nematode *Camallanus cotti*: extreme  
957 discontinuity in the rate of mitogenomic architecture evolution within the  
958 Chromadorea class. *BMC Genomics*, 18(1), 840. doi: 10.1186/s12864-017-4237-x
- 959 Zou, H., Jakovlić, I., Zhang, D., Chen, R., Mahboob, S., Al-Ghanim, K. A., ... Wang, G. (2018).  
960 The complete mitochondrial genome of *Cymothoa indica* has a highly rearranged  
961 gene order and clusters at the very base of the Isopoda clade. *PLOS ONE*, 13(9),  
962 e0203089. doi: 10.1371/journal.pone.0203089
- 963

## 964 **Data Accessibility**

965 DNA sequences: Genbank accessions MK079664, MK542856, MK542857 and MK542858. The remaining data are included within the article and its  
966 supplementary files

## 967 **Author Contributions**

968 IJ, DZ, HZ, and GTW designed research. DZ, HZ, CJH, WXL, KAAG, FAM, and SM performed research. DZ contributed analytical tools; IJ, DZ, HZ, CJH, WXL,  
969 KAAG, FAM, SM and GTW analyzed data. IJ and DZ wrote the paper, and all authors revised it critically for important intellectual content.

970

## 971 **Figures**

972 Figure 1. Mitochondrial phylogenomics of Isopoda (suborder information shown) reconstructed using partitioned nucleotide sequences of PCGs and rRNAs  
973 (NUC dataset) and BI algorithm. A set of nine non-isopod Malacostraca species and *Limulus polyphemus* were used as outgroups (order information shown).  
974 The scale bar corresponds to the estimated number of substitutions per site. Bayesian posterior support values are shown next to corresponding nodes.  
975 Star sign indicates a putative origin of replication inversion scenario implied by the topology (see Discussion).

976

977 Figure 2. A phylogram reconstructed using nonpartitioned NUC dataset and an algorithm designed to address compositional heterogeneity: CAT-GTR (PB).  
978 Posterior Bayesian support values are shown. See Figure 1 for other details.

979

980 Figure 3. A phylogram reconstructed using amino acid dataset (AAs; 13 PCGs) in combination with data partitioning strategy and BI algorithm. See Figure 1  
981 for other details.

982

983 Figure 4. A phylogram reconstructed using AAs dataset and CAT-GTR algorithm designed for heterogeneous datasets (PB). See Figure 1 for other details.

984

985 Figure 5. A phylogram reconstructed using mitochondrial gene orders (PCGs+rRNAs+tRNAs). Bootstrap support values are shown next to corresponding  
986 nodes. See Figure 1 for other details.  
987  
988 Figure 6. A phylogram inferred using the nuclear *18S* gene and CAT-GTR algorithm (PB). See Figure 1 for other details.  
989  
990 Figure 7. Cumulative GC skews of the majority strands of a selected subset of mitogenomes used for phylogenetic analyses.  
991  
992 Figure 8. Gene orders in the mitogenomes of Isopoda (and selected Malacostraca).  
993  
994  
995



- 996 **Supporting Information**
- 997
- 998 File S1: best partitioning scheme and model selection
- 999
- 1000 File S2: Phylograms produced by all analyses.
- 1001
- 1002 File S3: The 18S dataset with taxonomy details.
- 1003
- 1004 File S4: Alignments used in this study.
- 1005

1006 **Tables**

1007 Table 1. Taxonomy, length (bp), base composition (%) and skews of mitogenomes used in the analysis. P column indicates whether a species is parasitic. H indicates  
 1008 the habitat: F - freshwater, M - marine, T - terrestrial, and I - intertidal.

1009

| Species                        | Suborder       | Family         | Acc. no.  | Length | A+T  | A  | C    | AT skew | GC skew | P | H    |
|--------------------------------|----------------|----------------|-----------|--------|------|----|------|---------|---------|---|------|
| <b>Isopoda</b>                 |                |                |           |        |      |    |      |         |         |   |      |
| <i>Asellus aquaticus</i>       | Asellota       | Asellidae      | GU130252  | 13639  | 61.9 | 31 | 21.3 | 0.002   | -0.122  |   | F    |
| <i>Cymothoa indica</i>         | Cymothoidea    | Cymothoidae    | MH396438  | 14475  | 63.8 | 36 | 26.1 | 0.129   | -0.442  | √ | M    |
| <i>Ichthyoxenos japonensis</i> | Cymothoidea    | Cymothoidae    | MF419233  | 15440  | 72.7 | 37 | 18.7 | 0.026   | -0.375  | √ | F    |
| <i>Tachaea chinensis</i>       | Cymothoidea    | Corallanidae   | MF419232  | 14616  | 72.8 | 38 | 18.5 | 0.055   | -0.354  | √ | F    |
| <i>Eurydice pulchra</i>        | Cymothoidea    | Cirolanidae    | GU130253  | 13055  | 55.9 | 27 | 17.7 | -0.052  | 0.198   |   | M, I |
| <i>Bathynomus</i> sp.          | Cymothoidea    | Cirolanidae    | KU057374  | 14965  | 58.7 | 27 | 17   | -0.093  | 0.175   |   | M    |
| <i>Gyge ovalis</i>             | Cymothoidea    | Bopyridae      | NC_037467 | 14268  | 59.6 | 27 | 17.8 | -0.093  | 0.118   | √ | M    |
| <i>Eophreatoicus</i> sp.       | Phreatoicoidea | Amphisopidae   | NC_013976 | 14994  | 69.6 | 31 | 11.4 | -0.104  | 0.25    |   | F    |
| <i>Sphaeroma serratum</i>      | Sphaeromatidea | Sphaeromatidae | GU130256  | 13467  | 54.4 | 25 | 17.8 | -0.069  | 0.219   |   | M    |
| <i>Limnoria quadripunctata</i> | Limnoriidea    | Limnoriidae    | NC_024054 | 16515  | 66.3 | 30 | 13.6 | -0.104  | 0.188   |   | M    |

|                                 |           |                 |           |       |      |    |      |        |       |         |
|---------------------------------|-----------|-----------------|-----------|-------|------|----|------|--------|-------|---------|
| <i>Idotea balthica</i>          | Valvifera | Idoteidae       | DQ442915  | 14247 | 61   | 28 | 16.3 | -0.076 | 0.163 | M       |
| <i>Glyptonotus antarcticus</i>  | Valvifera | Chaetiliidae    | GU130254  | 13809 | 65.4 | 32 | 16.6 | -0.033 | 0.038 | M       |
| <i>Trachelipus rathkii</i>      | Oniscidea | Trachelipodidae | MF187612  | 14080 | 67.3 | 33 | 13.3 | -0.029 | 0.184 | T       |
| <i>Porcellio dilatatus</i>      | Oniscidea | Porcellionidae  | KX289582  | 14103 | 65.6 | 31 | 13.4 | -0.067 | 0.224 | T       |
| <i>Cylisticus convexus</i>      | Oniscidea | Cylisticidae    | KR013002  | 14154 | 67.8 | 33 | 12.9 | -0.035 | 0.194 | T       |
| <i>Porcellionides pruinosus</i> | Oniscidea | Porcellionidae  | KX289584  | 14078 | 60.5 | 28 | 14.9 | -0.09  | 0.248 | T       |
| <i>Armadillidium album</i>      | Oniscidea | Armadillidiidae | KX289585  | 13812 | 69.7 | 33 | 12.5 | -0.045 | 0.172 | T       |
| <i>Armadillidium nasatum</i>    | Oniscidea | Armadillidiidae | MF187611  | 13943 | 68.1 | 33 | 13.4 | -0.043 | 0.16  | T       |
| <i>Armadillidium vulgare</i>    | Oniscidea | Armadillidiidae | MF187614  | 13932 | 71.5 | 34 | 11.8 | -0.043 | 0.174 | T       |
| <i>Armadillidium vulgare</i>    | Oniscidea | Armadillidiidae | MF187613  | 13955 | 71.3 | 34 | 11.8 | -0.039 | 0.179 | T       |
| <i>Ligia oceanica</i>           | Oniscidea | Ligiidae        | NC_008412 | 15289 | 60.9 | 29 | 17   | -0.041 | 0.134 | M, I, T |

| Species                                                 | Order    | Suborder         | Acc. no.  | Length | A+T  | A  | C    | AT skew | GC skew |
|---------------------------------------------------------|----------|------------------|-----------|--------|------|----|------|---------|---------|
| <b>Non-isopod Malacostraca and <i>L. polyphemus</i></b> |          |                  |           |        |      |    |      |         |         |
| <i>Atergatis floridus</i>                               | Decapoda | Pleocyemata      | NC_037201 | 16180  | 69.3 | 33 | 20.3 | -0.036  | -0.319  |
| <i>Penaeus vannamei</i>                                 | Decapoda | Dendrobranchiata | NC_009626 | 15990  | 67.7 | 33 | 19.2 | -0.026  | -0.192  |
| <i>Typhlatya miravetensis</i>                           | Decapoda | Pleocyemata      | NC_036335 | 15865  | 66.2 | 36 | 22.5 | 0.076   | -0.332  |

|                                |              |              |           |       |      |    |      |        |        |
|--------------------------------|--------------|--------------|-----------|-------|------|----|------|--------|--------|
| <i>Squilla mantis</i>          | Stomatopoda  | Unipeltata   | NC_006081 | 15994 | 70.2 | 35 | 16.8 | -0.001 | -0.13  |
| <i>Lysiosquillina maculata</i> | Stomatopoda  | Unipeltata   | NC_007443 | 16325 | 63.9 | 33 | 21.4 | 0.026  | -0.185 |
| <i>Metacrangonyx repens</i>    | Amphipoda    | Senticaudata | NC_019653 | 14355 | 76.9 | 38 | 11.7 | -0.025 | -0.014 |
| <i>Neomysis japonica</i>       | Mysida       | NA           | NC_027510 | 17652 | 74.5 | 37 | 13.8 | -0.021 | -0.085 |
| <i>Eulimnogammarus cyaneus</i> | Amphipoda    | Senticaudata | NC_033360 | 14370 | 67.6 | 33 | 20.3 | -0.019 | -0.251 |
| <i>Euphausia pacifica</i>      | Euphausiacea | NA           | NC_016184 | 16898 | 72   | 36 | 16   | 0.004  | -0.145 |
| <i>Limulus polyphemus</i>      | Xiphosurida  | NA           | NC_003057 | 14985 | 67.6 | 38 | 22.7 | 0.111  | -0.399 |

---

1010

bioRxiv preprint doi: <https://doi.org/10.1101/307960>; this version posted April 13, 2019. The copyright holder for this preprint (which was not certified by peer review) is the author/funder, who has granted bioRxiv a license to display the preprint in perpetuity. It is made available under aCC-BY-NC-ND 4.0 International license.

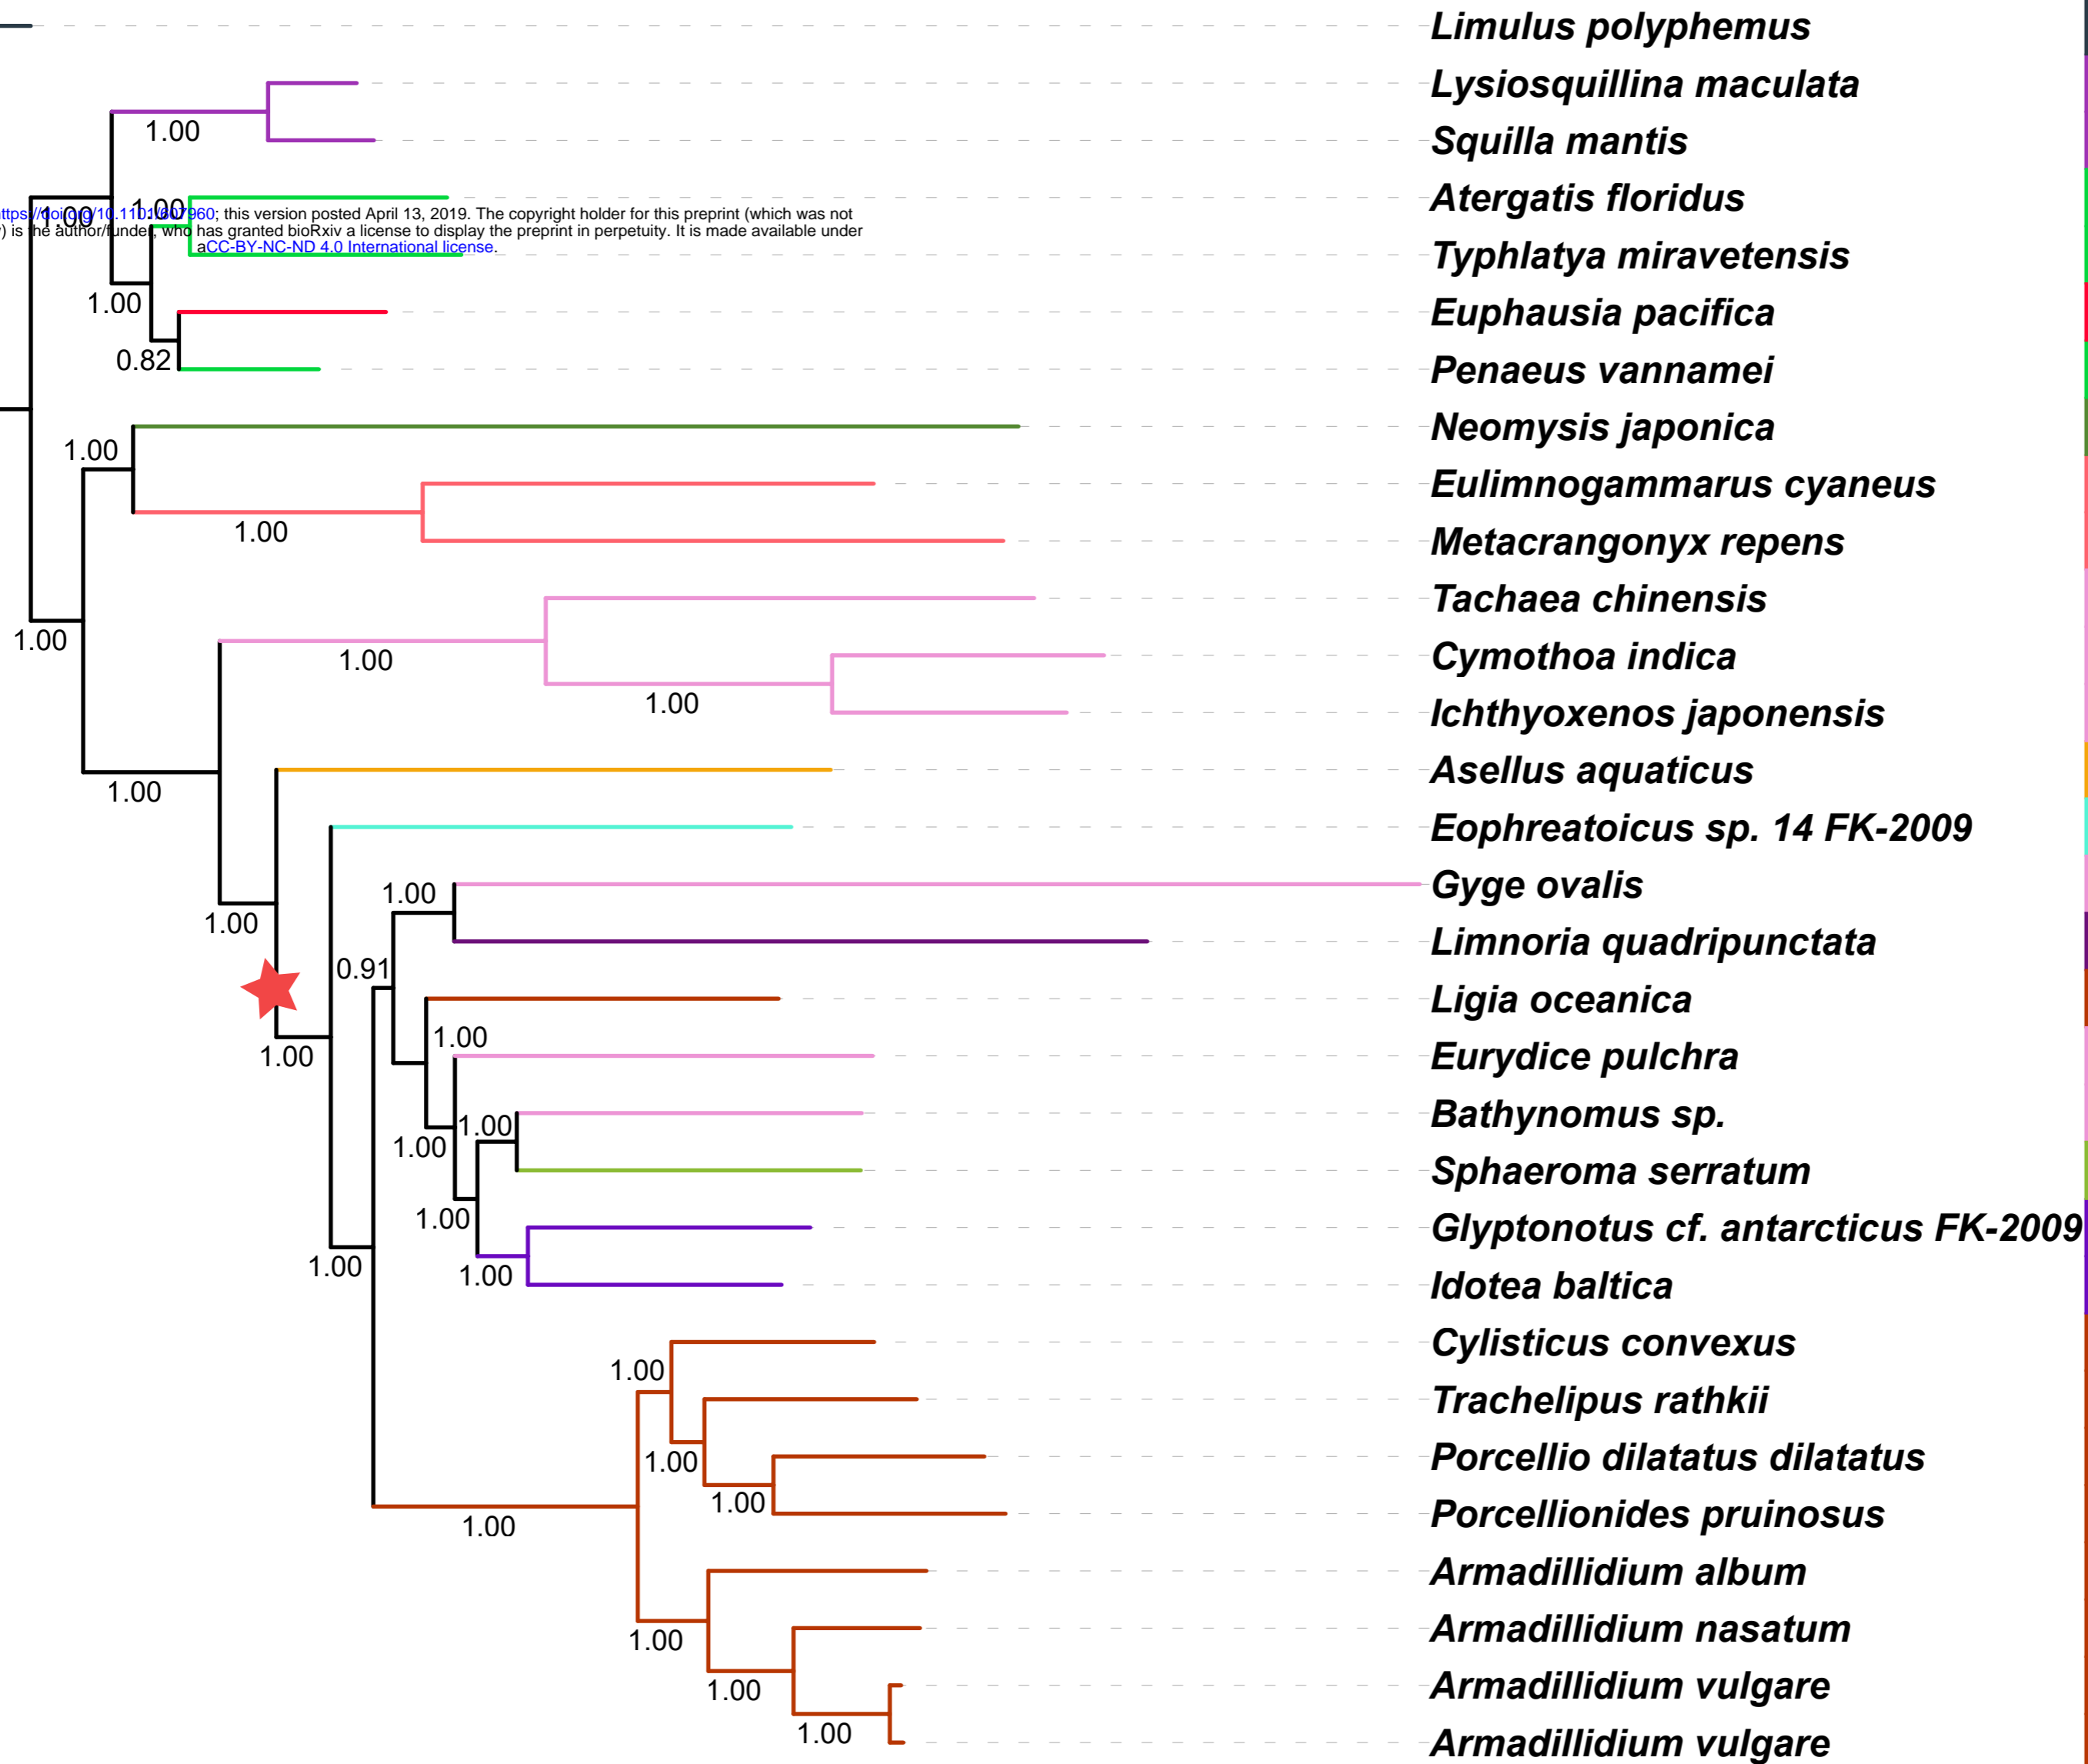

- Xiphosurida
- Stomatopoda
- Decapoda
- Euphausiacea
- Decapoda
- Mysida
- Amphipoda
- Cymothoidea
- Asellota
- Phreatoicidea
- Cymothoidea
- Limnoriidea
- Oniscidea
- Cymothoidea
- Sphaeromatidea
- Valvifera
- Oniscidea

1

bioRxiv preprint doi: <https://doi.org/10.1101/607960>; this version posted April 13, 2019. The copyright holder for this preprint (which was not certified by peer review) is the author/funder, who has granted bioRxiv a license to display the preprint in perpetuity. It is made available under aCC-BY-NC-ND 4.0 International license.

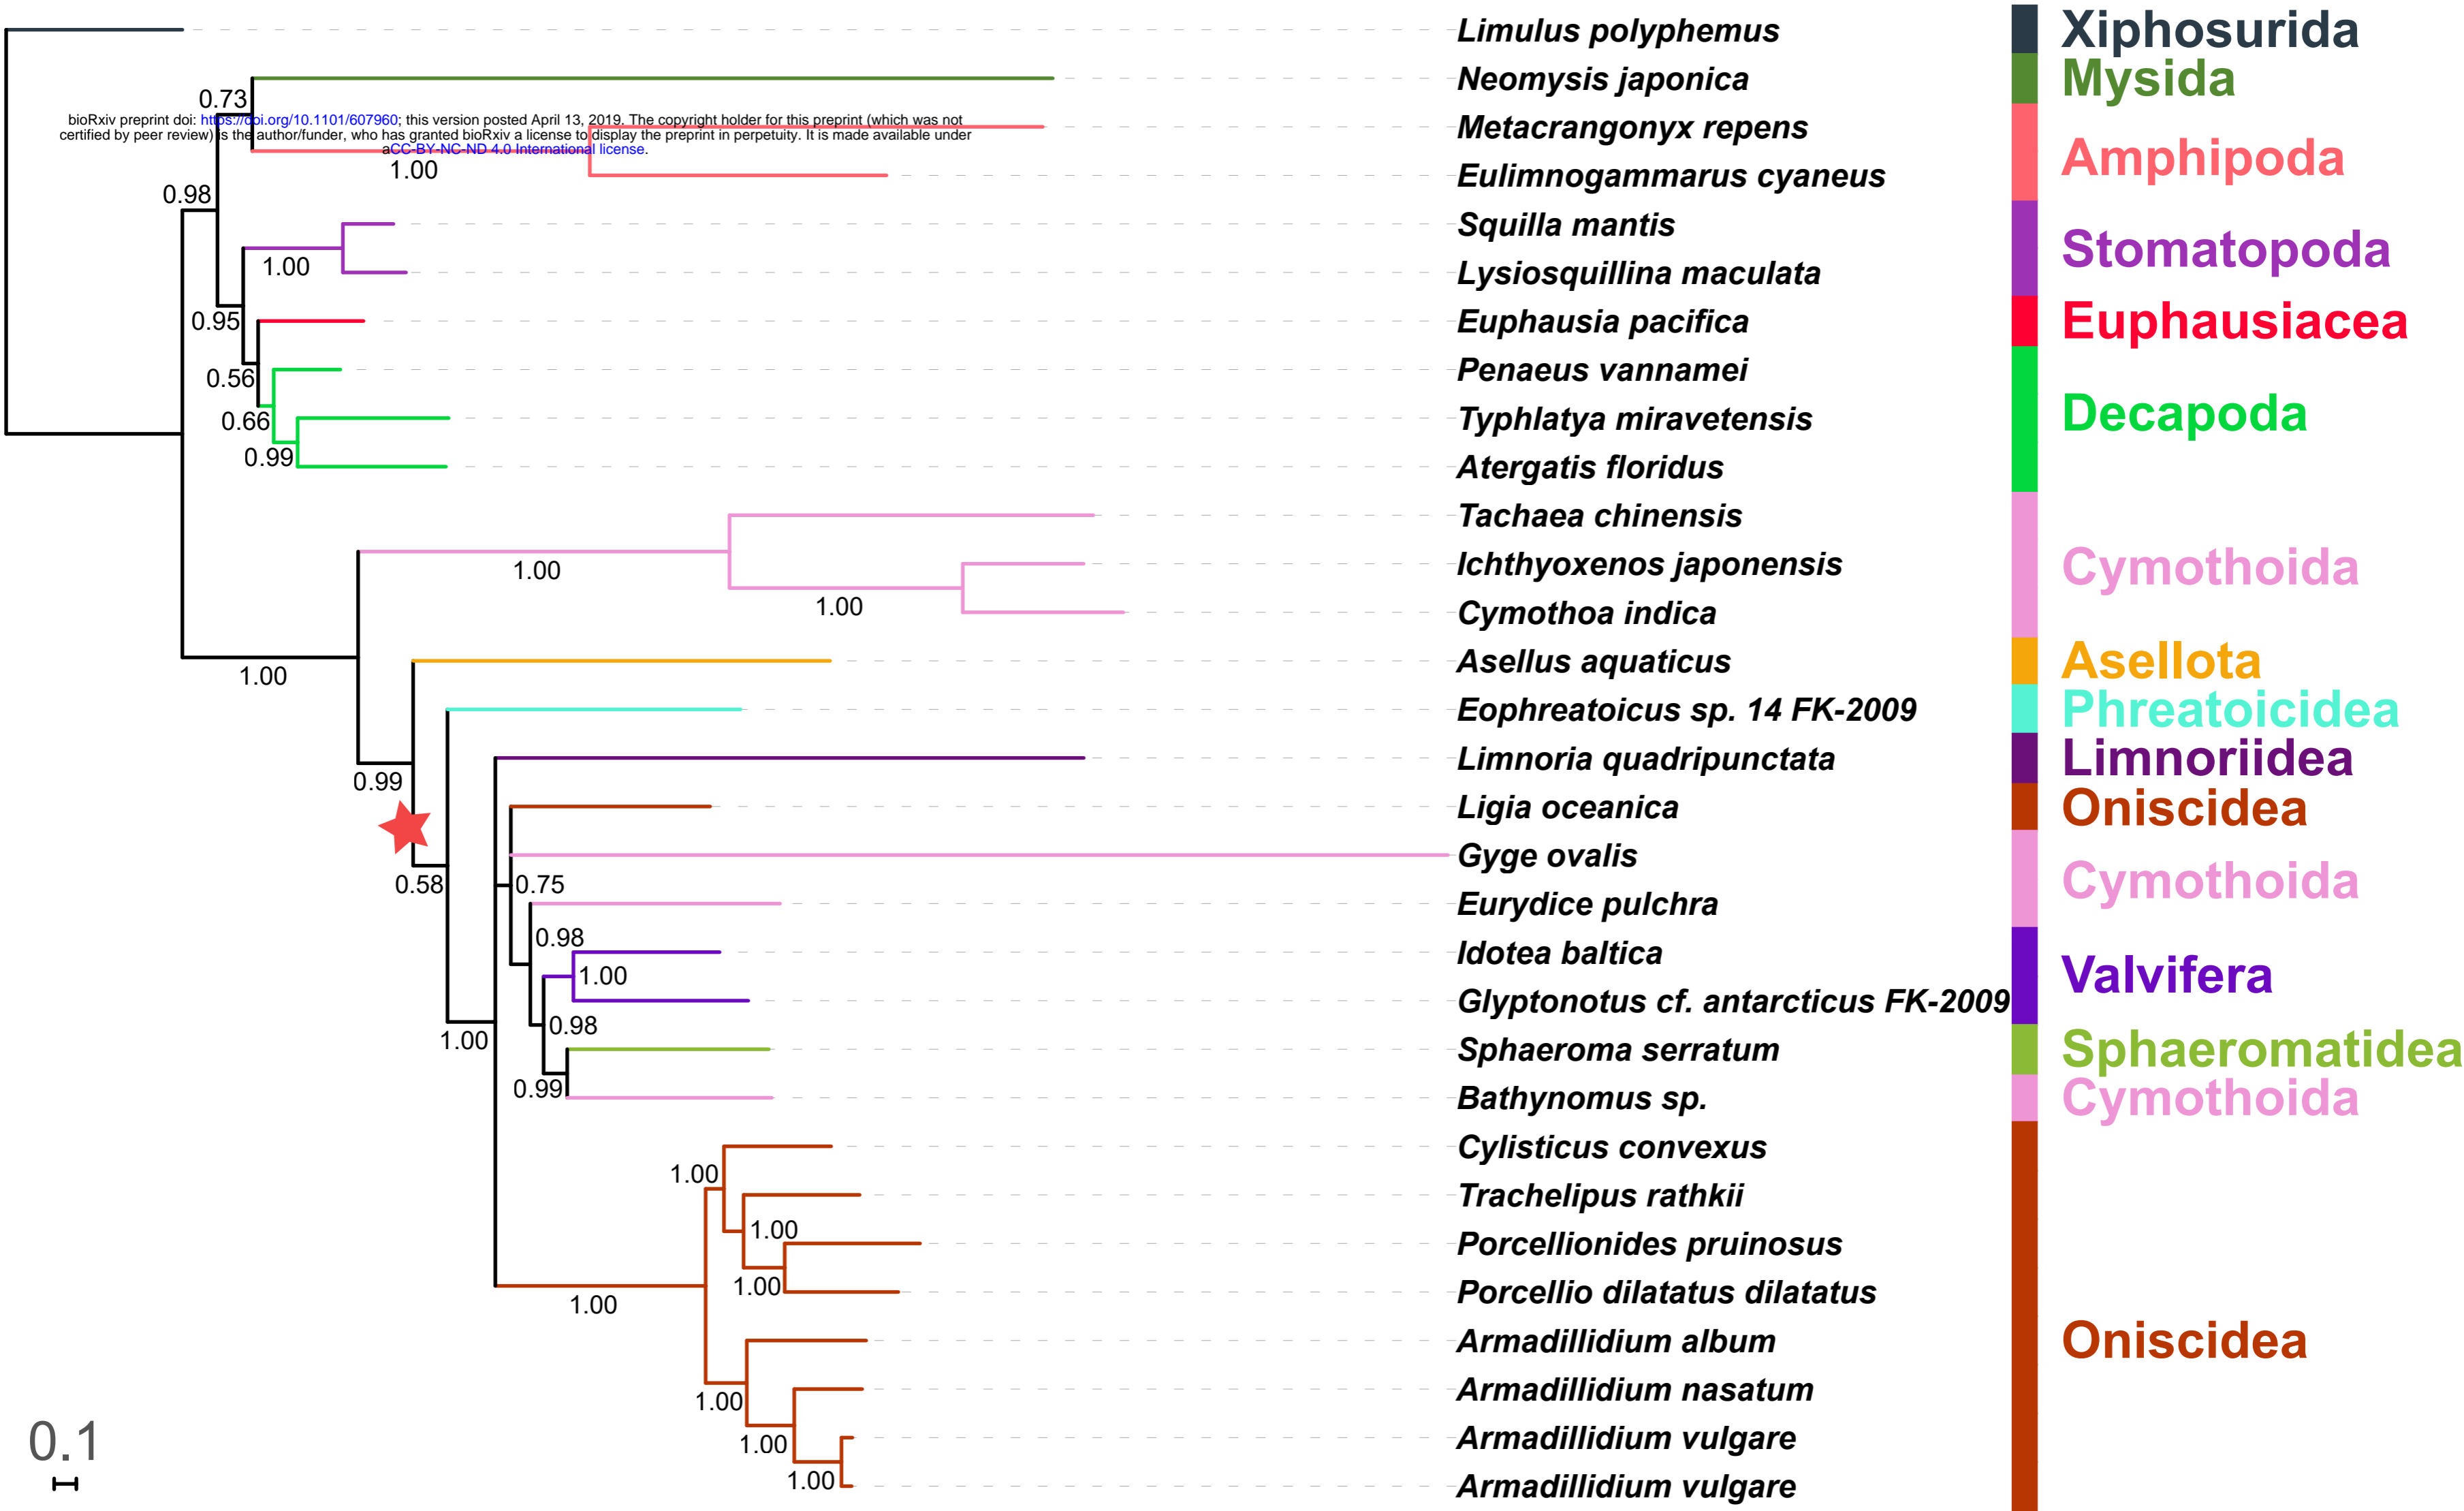

- Limulus polyphemus*
- Neomysis japonica*
- Metacrangonyx repens*
- Eulimnogammarus cyaneus*
- Squilla mantis*
- Lysiosquillina maculata*
- Euphausia pacifica*
- Penaeus vannamei*
- Typhlatya miravetensis*
- Atergatis floridus*
- Tachaea chinensis*
- Ichthyoxenos japonensis*
- Cymothoa indica*
- Asellus aquaticus*
- Eophreatoicus sp. 14 FK-2009*
- Limnoria quadripunctata*
- Ligia oceanica*
- Gyge ovalis*
- Eurydice pulchra*
- Idotea baltica*
- Glyptonotus cf. antarcticus FK-2009*
- Sphaeroma serratum*
- Bathynomus sp.*
- Cylisticus convexus*
- Trachelipus rathkii*
- Porcellionides pruinosus*
- Porcellio dilatatus dilatatus*
- Armadillidium album*
- Armadillidium nasatum*
- Armadillidium vulgare*
- Armadillidium vulgare*

- Xiphosurida
- Mysida
- Amphipoda
- Stomatopoda
- Euphausiacea
- Decapoda
- Cymothoida
- Asellota
- Phreatoicidea
- Limnoriidea
- Oniscidea
- Cymothoida
- Valvifera
- Sphaeromatidea
- Cymothoida

Oniscidea

0.1  
H

bioRxiv preprint doi: <https://doi.org/10.1101/607960>; this version posted April 13, 2019. The copyright holder for this preprint (which was not certified by peer review) is the author/funder, who has granted bioRxiv a license to display the preprint in perpetuity. It is made available under aCC-BY-NC-ND 4.0 International license.

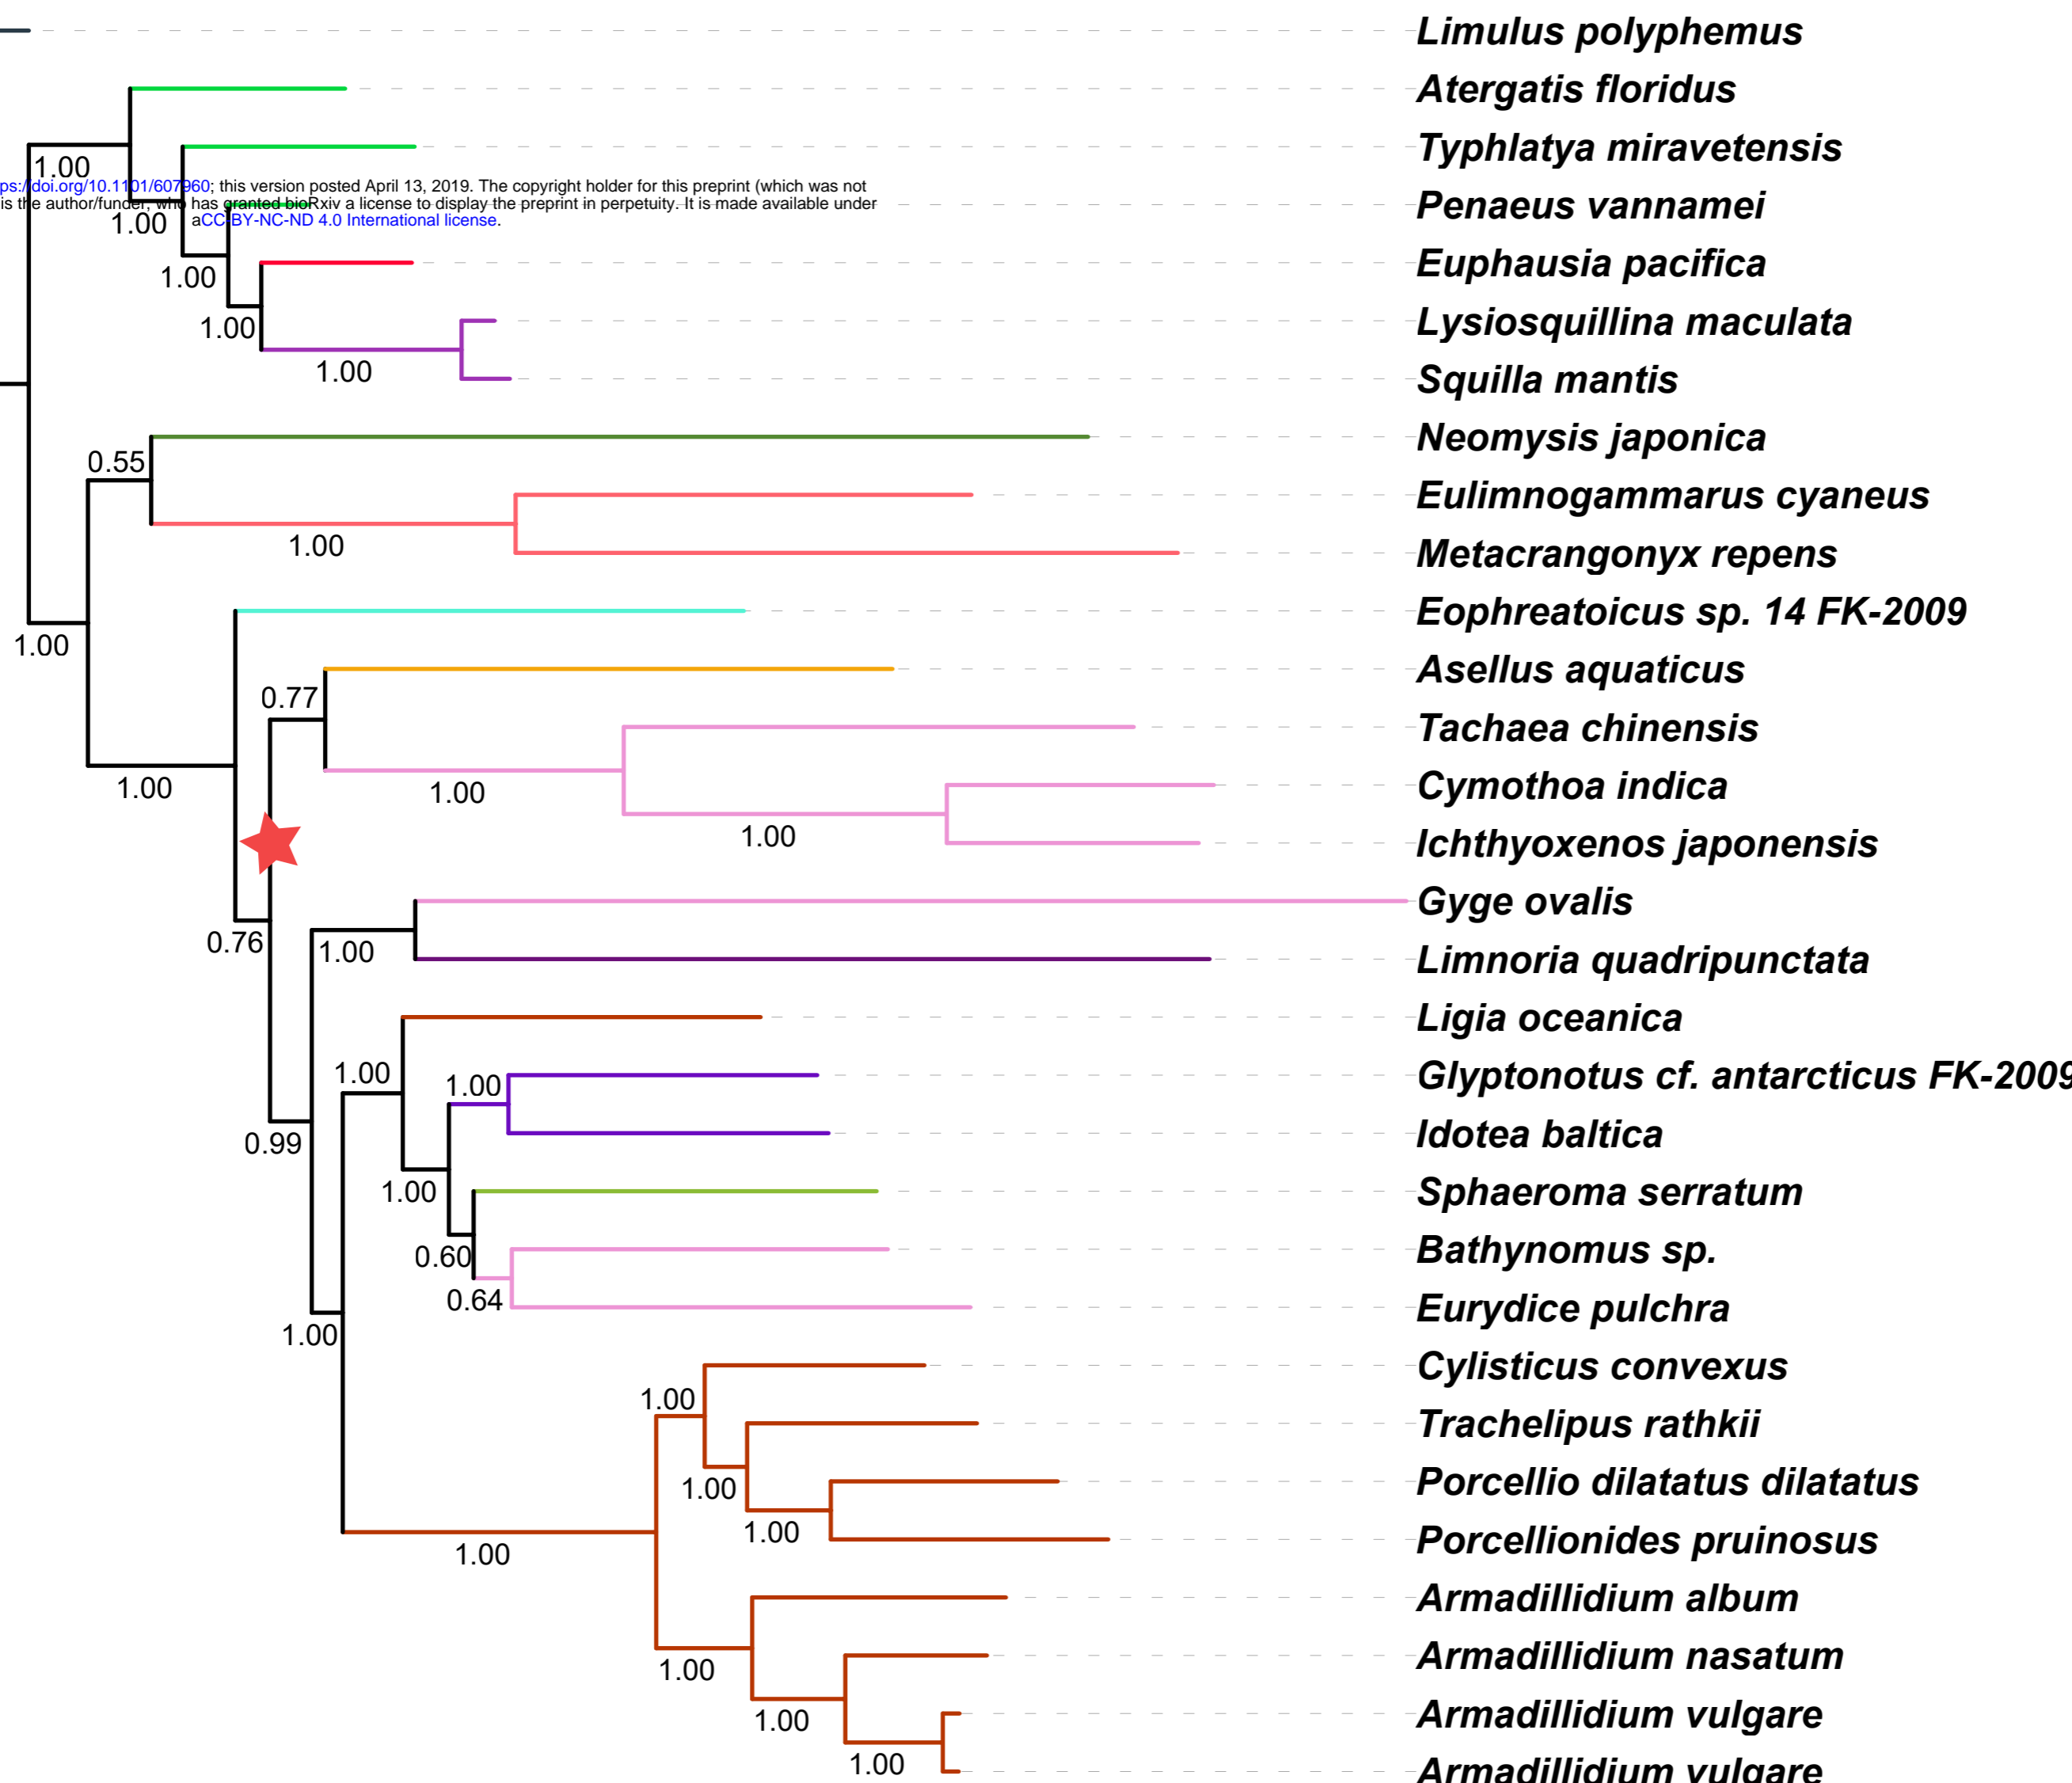

- Limulus polyphemus*
- Atergatis floridus*
- Typhlatya miravetensis*
- Penaeus vannamei*
- Euphausia pacifica*
- Lysiosquillina maculata*
- Squilla mantis*
- Neomysis japonica*
- Eulimnogammarus cyaneus*
- Metacrangonyx repens*
- Eophreatoicus sp. 14 FK-2009*
- Asellus aquaticus*
- Tachaea chinensis*
- Cymothoa indica*
- Ichthyoxenos japonensis*
- Gyge ovalis*
- Limnoria quadripunctata*
- Ligia oceanica*
- Glyptonotus cf. antarcticus FK-2009*
- Idotea baltica*
- Sphaeroma serratum*
- Bathynomus sp.*
- Eurydice pulchra*
- Cylisticus convexus*
- Trachelipus rathkii*
- Porcellio dilatatus dilatatus*
- Porcellionides pruinosus*
- Armadillidium album*
- Armadillidium nasatum*
- Armadillidium vulgare*
- Armadillidium vulgare*

- Xiphosurida**
- Decapoda**
- Euphausiacea**
- Stomatopoda**
- Mysida**
- Amphipoda**
- Phreatoicidea**
- Asellota**
- Cymothoidea**
- Limnoriidea**
- Oniscidea**
- Valvifera**
- Sphaeromatidea**
- Cymothoidea**
- Oniscidea**

0.1

bioRxiv preprint doi: <https://doi.org/10.1101/607960>; this version posted April 13, 2019. The copyright holder for this preprint (which was not certified by peer review) is the author/funder, who has granted bioRxiv a license to display the preprint in perpetuity. It is made available under aCC-BY-NC-ND 4.0 International license.

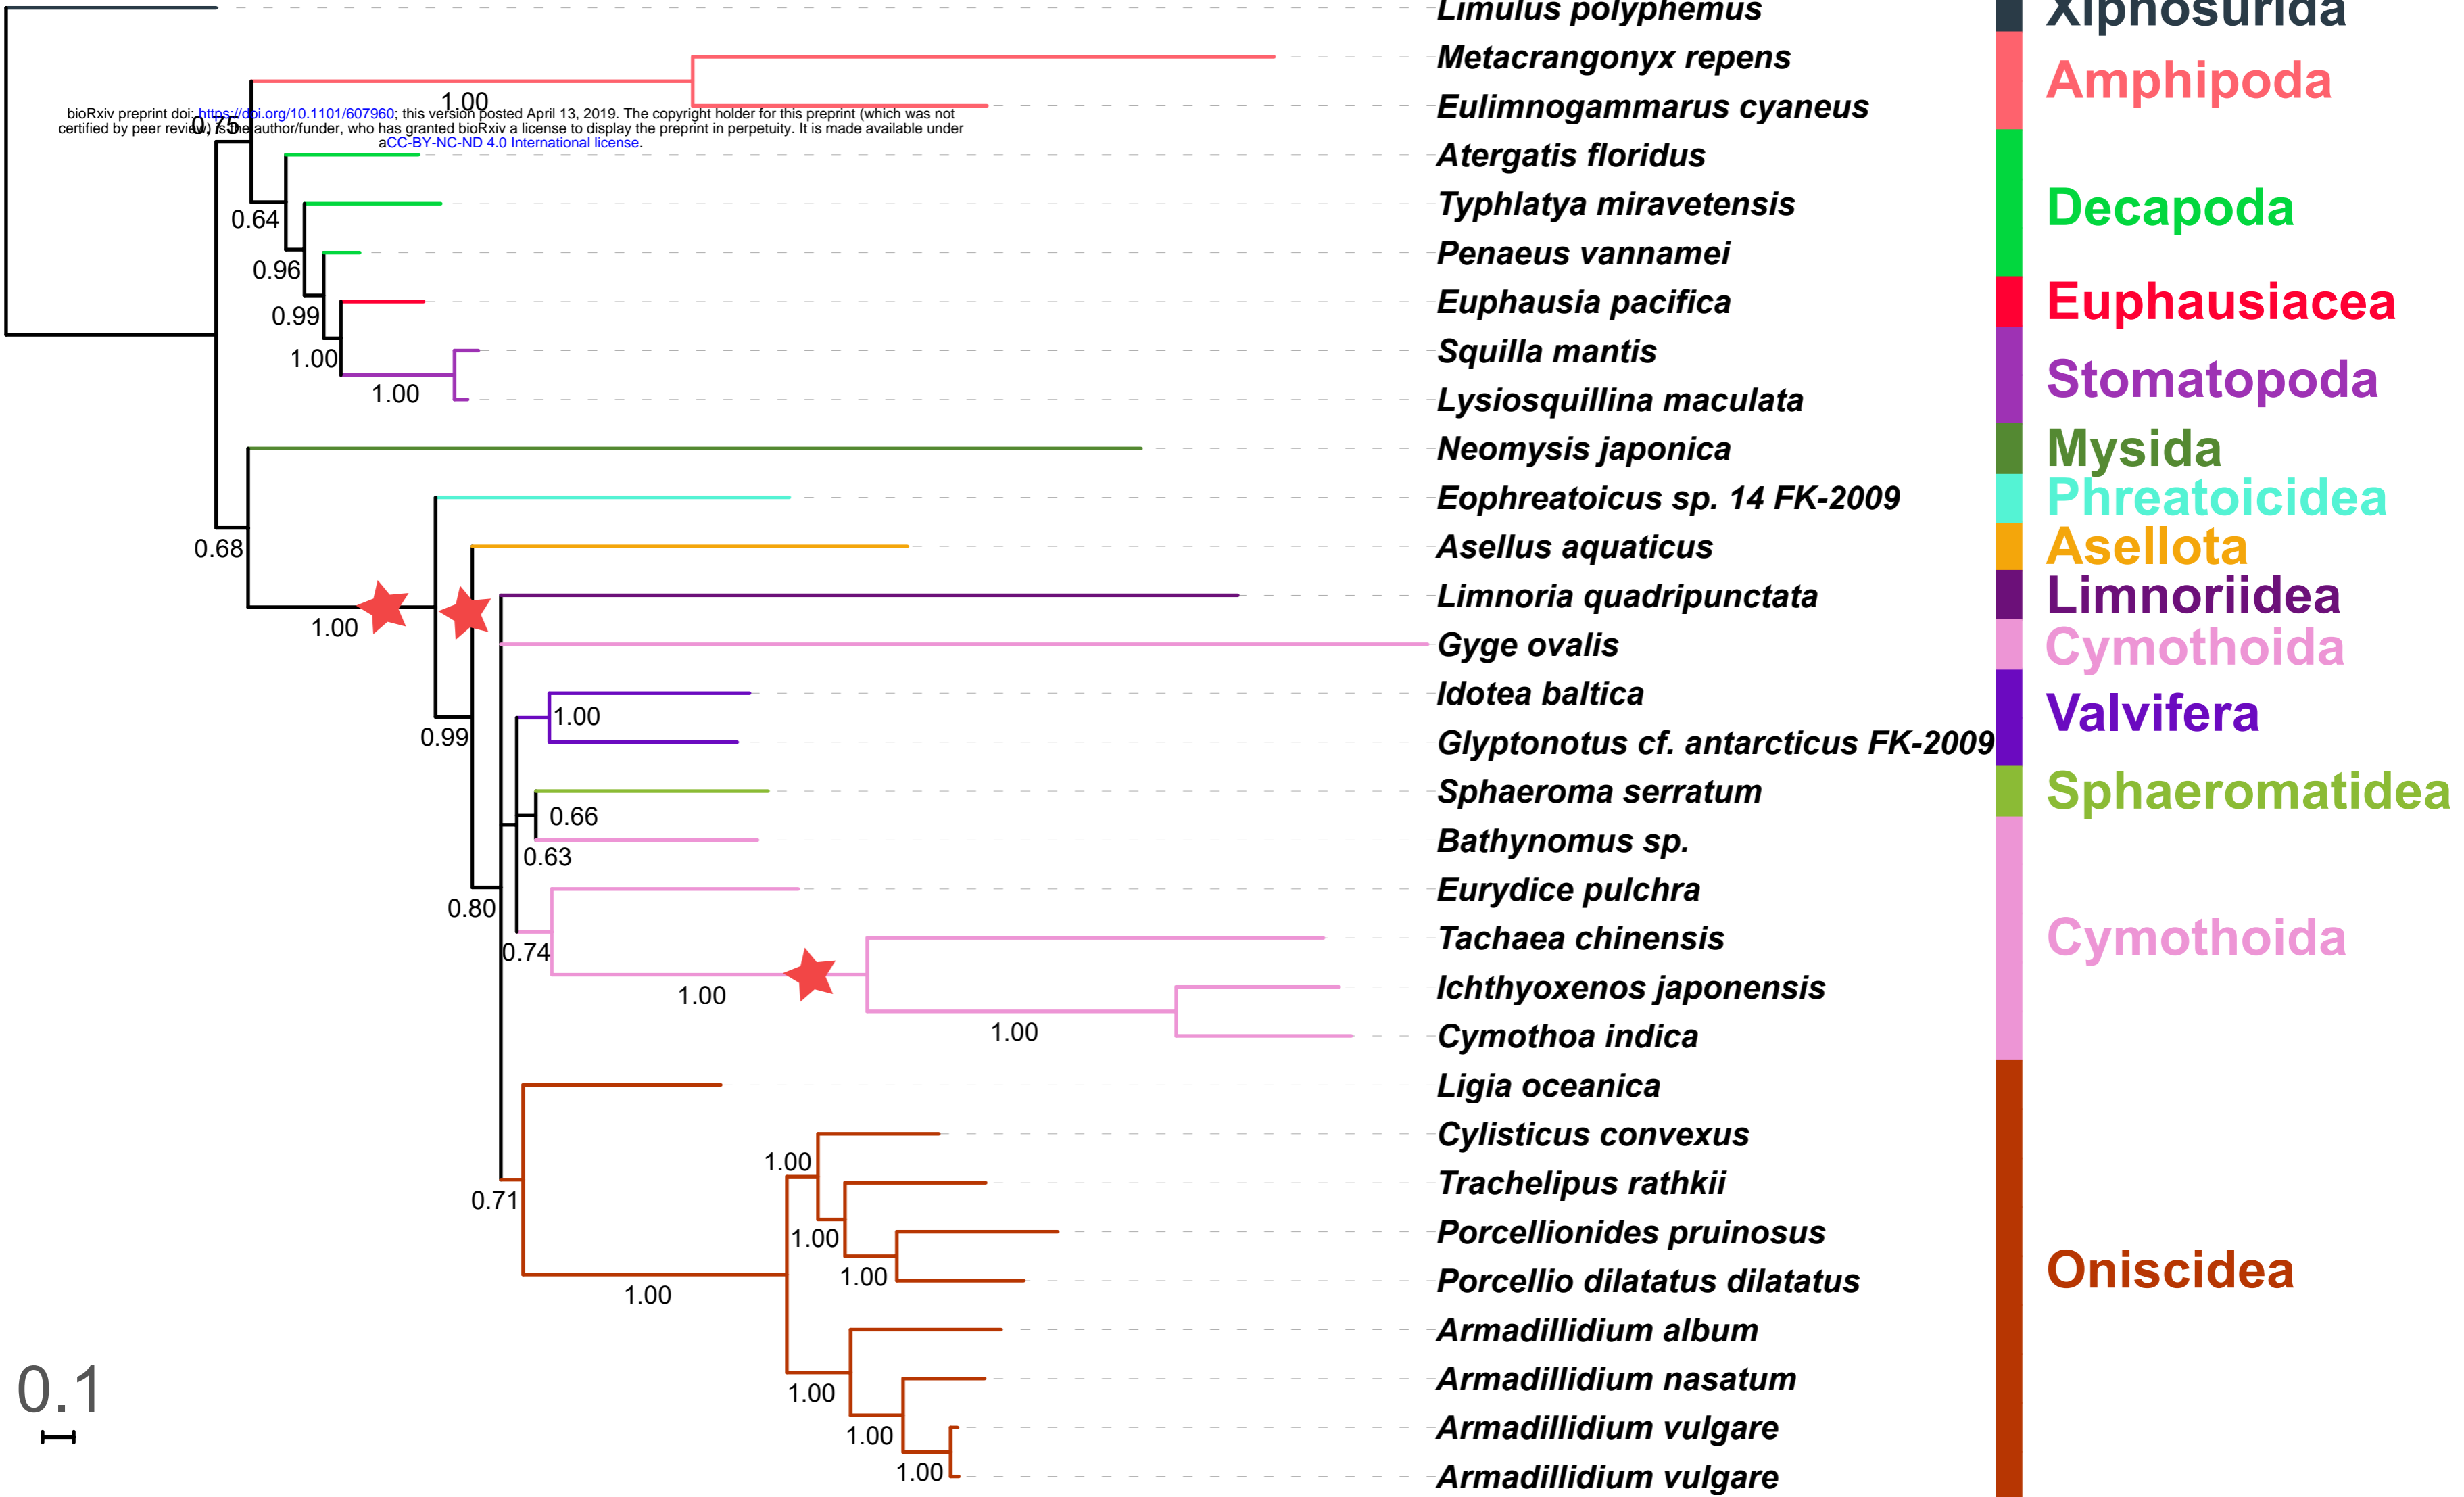



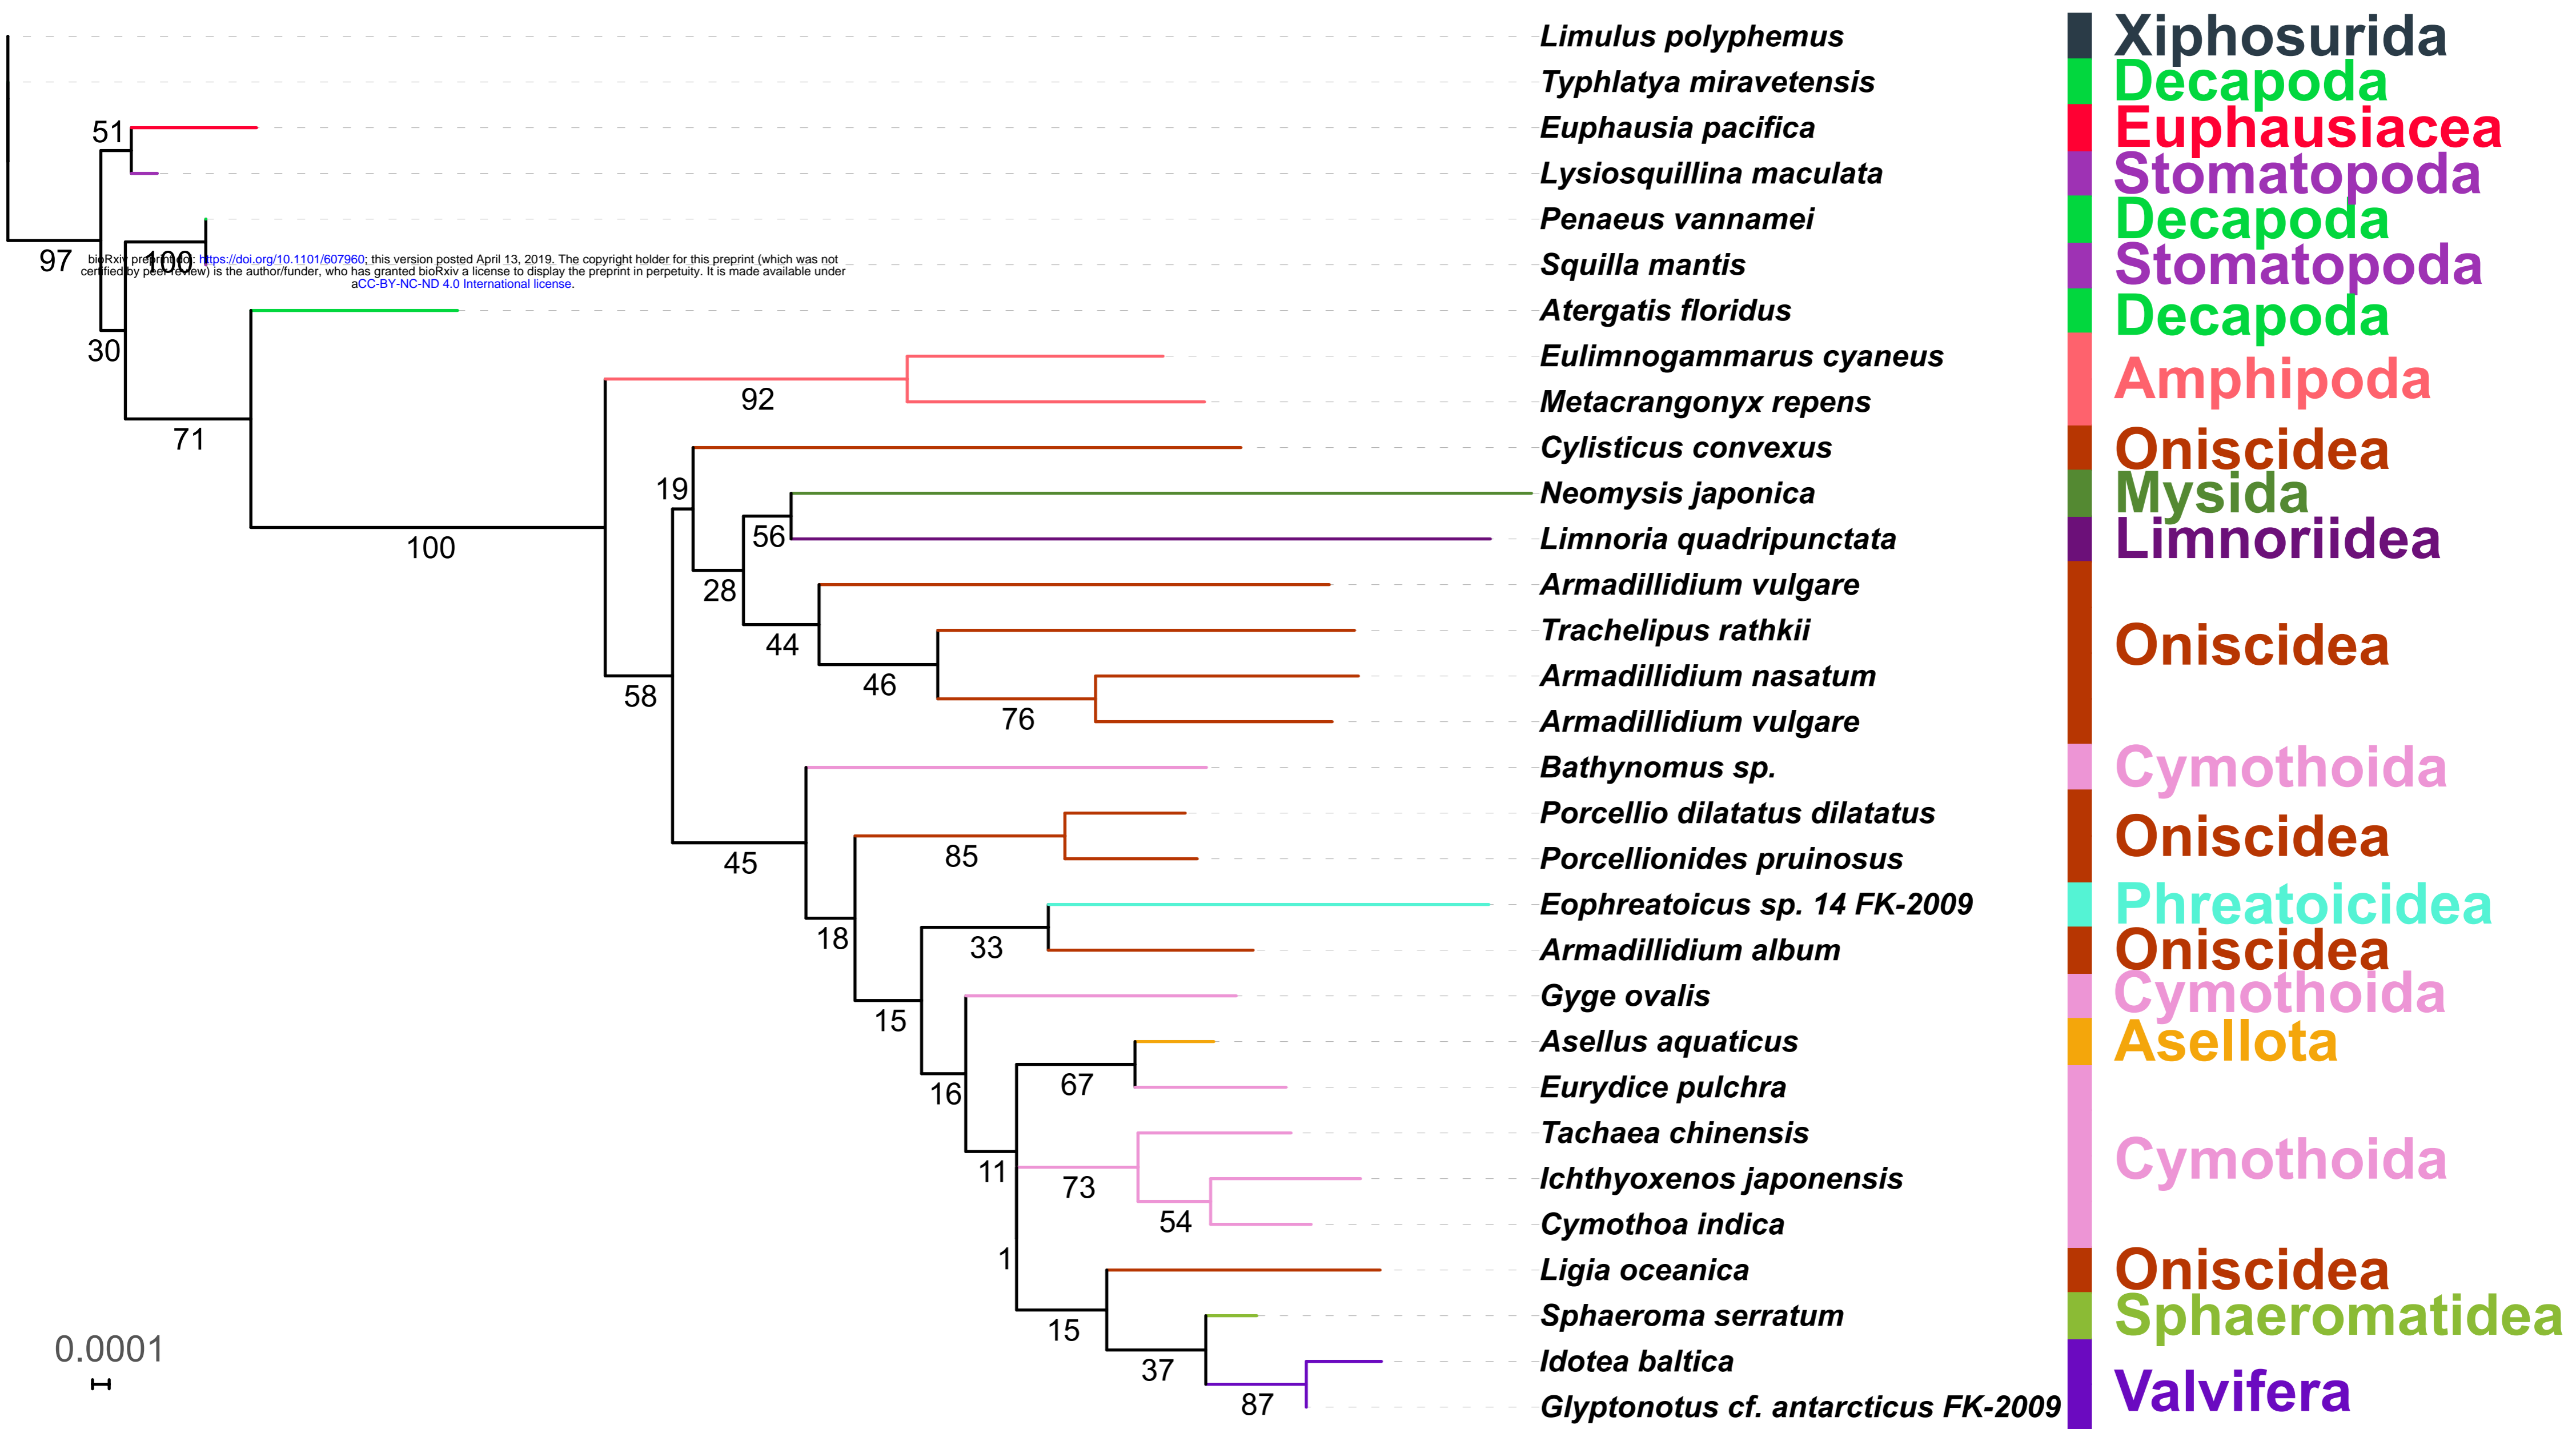

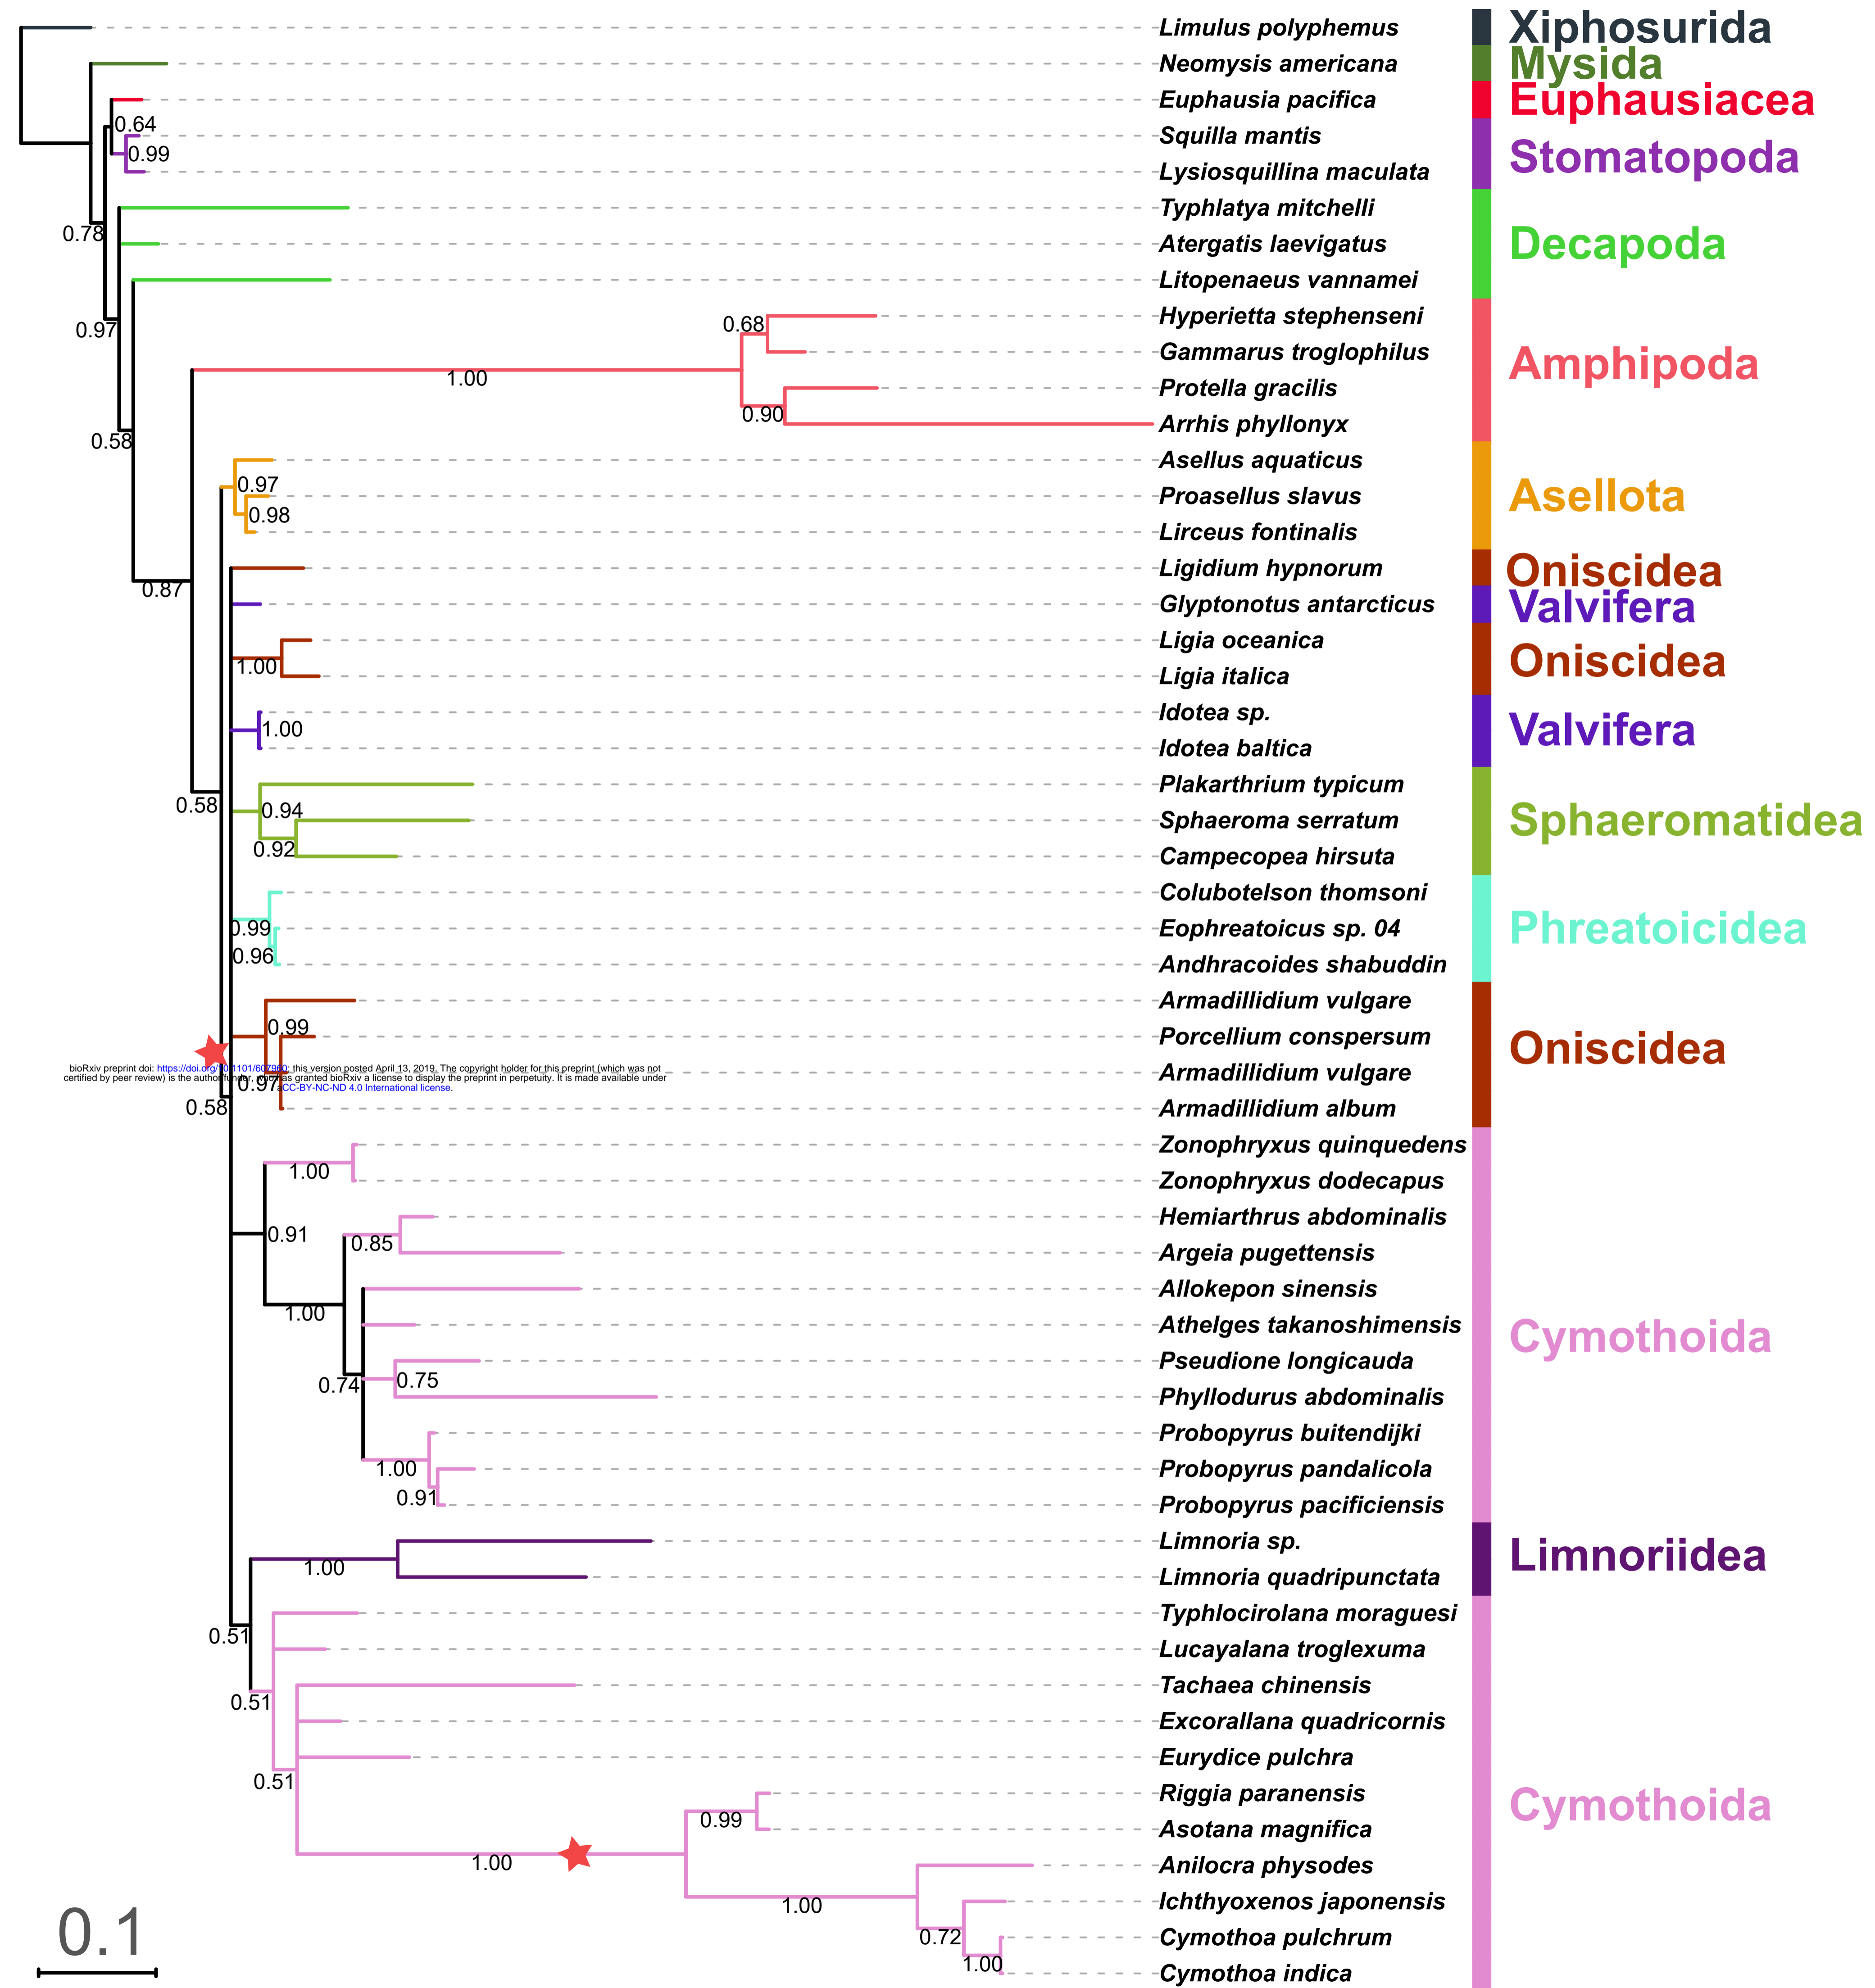

# GC Skew

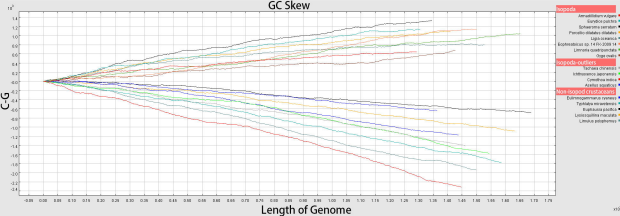

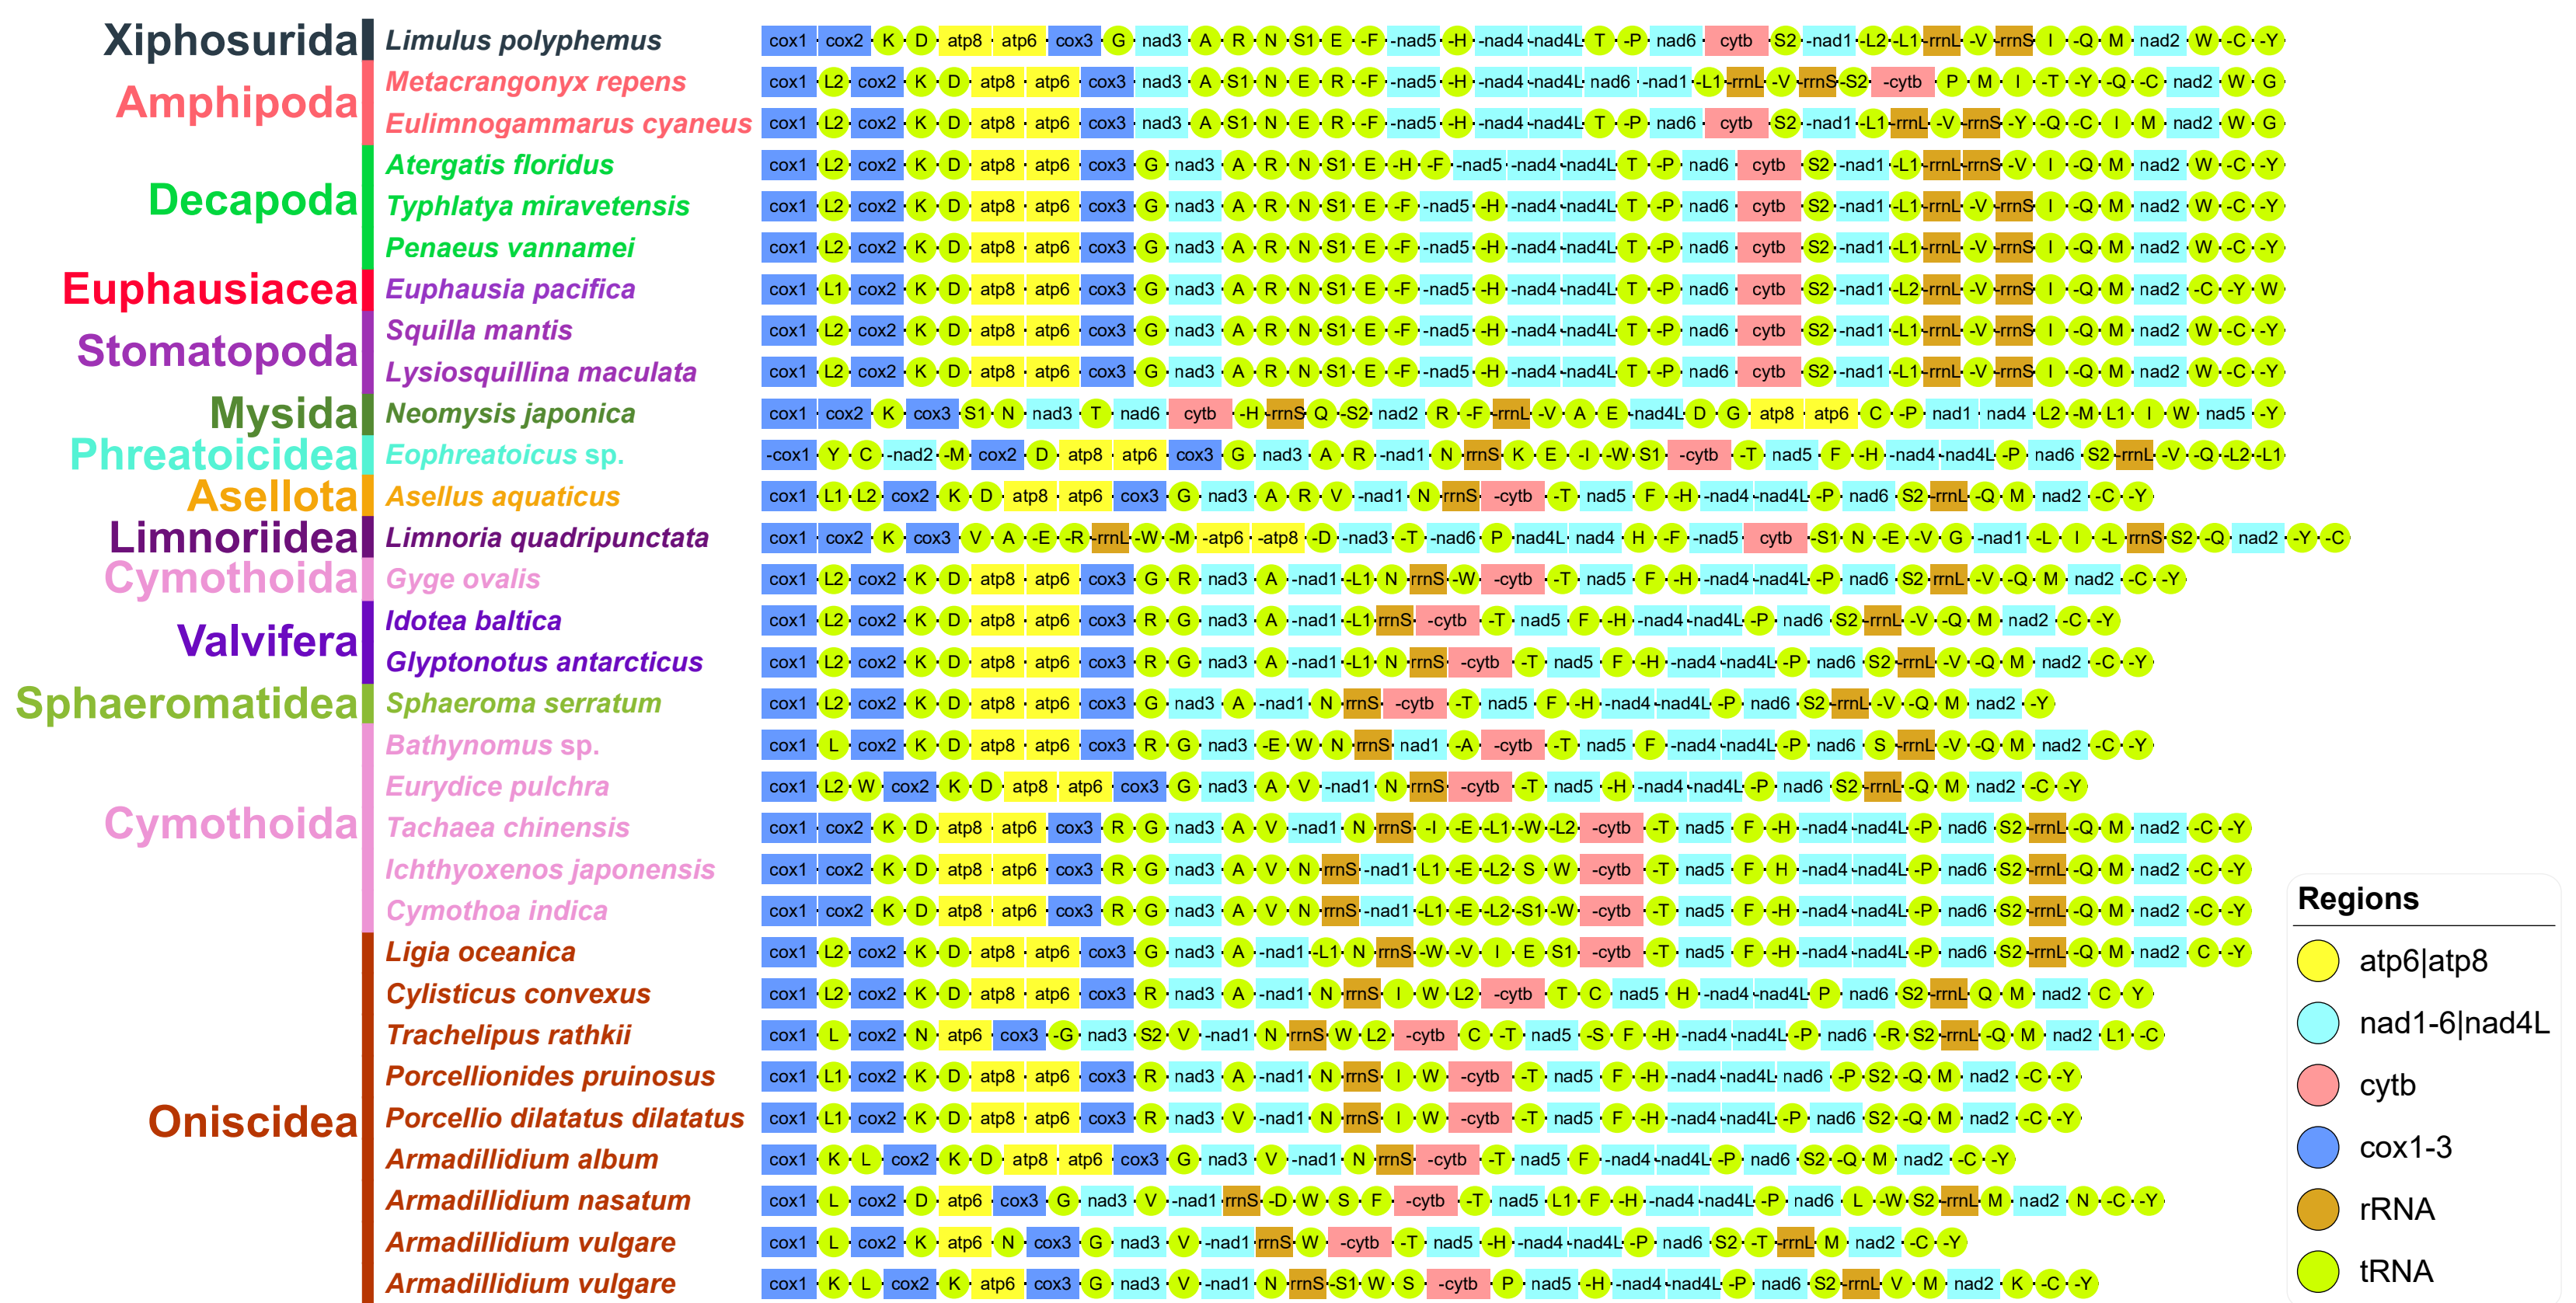

Source: http://biorxiv.org/content/10.1101/607960v1.full.pdf
