# Supplementary material for: Mitochondrial architecture rearrangements produce asymmetrical nonadaptive mutational pressures that subvert the phylogenetic reconstruction in Isopoda
Source: bioRxiv or medRxiv preprint supplement (doi:10.1101/607960), 2019-04-13

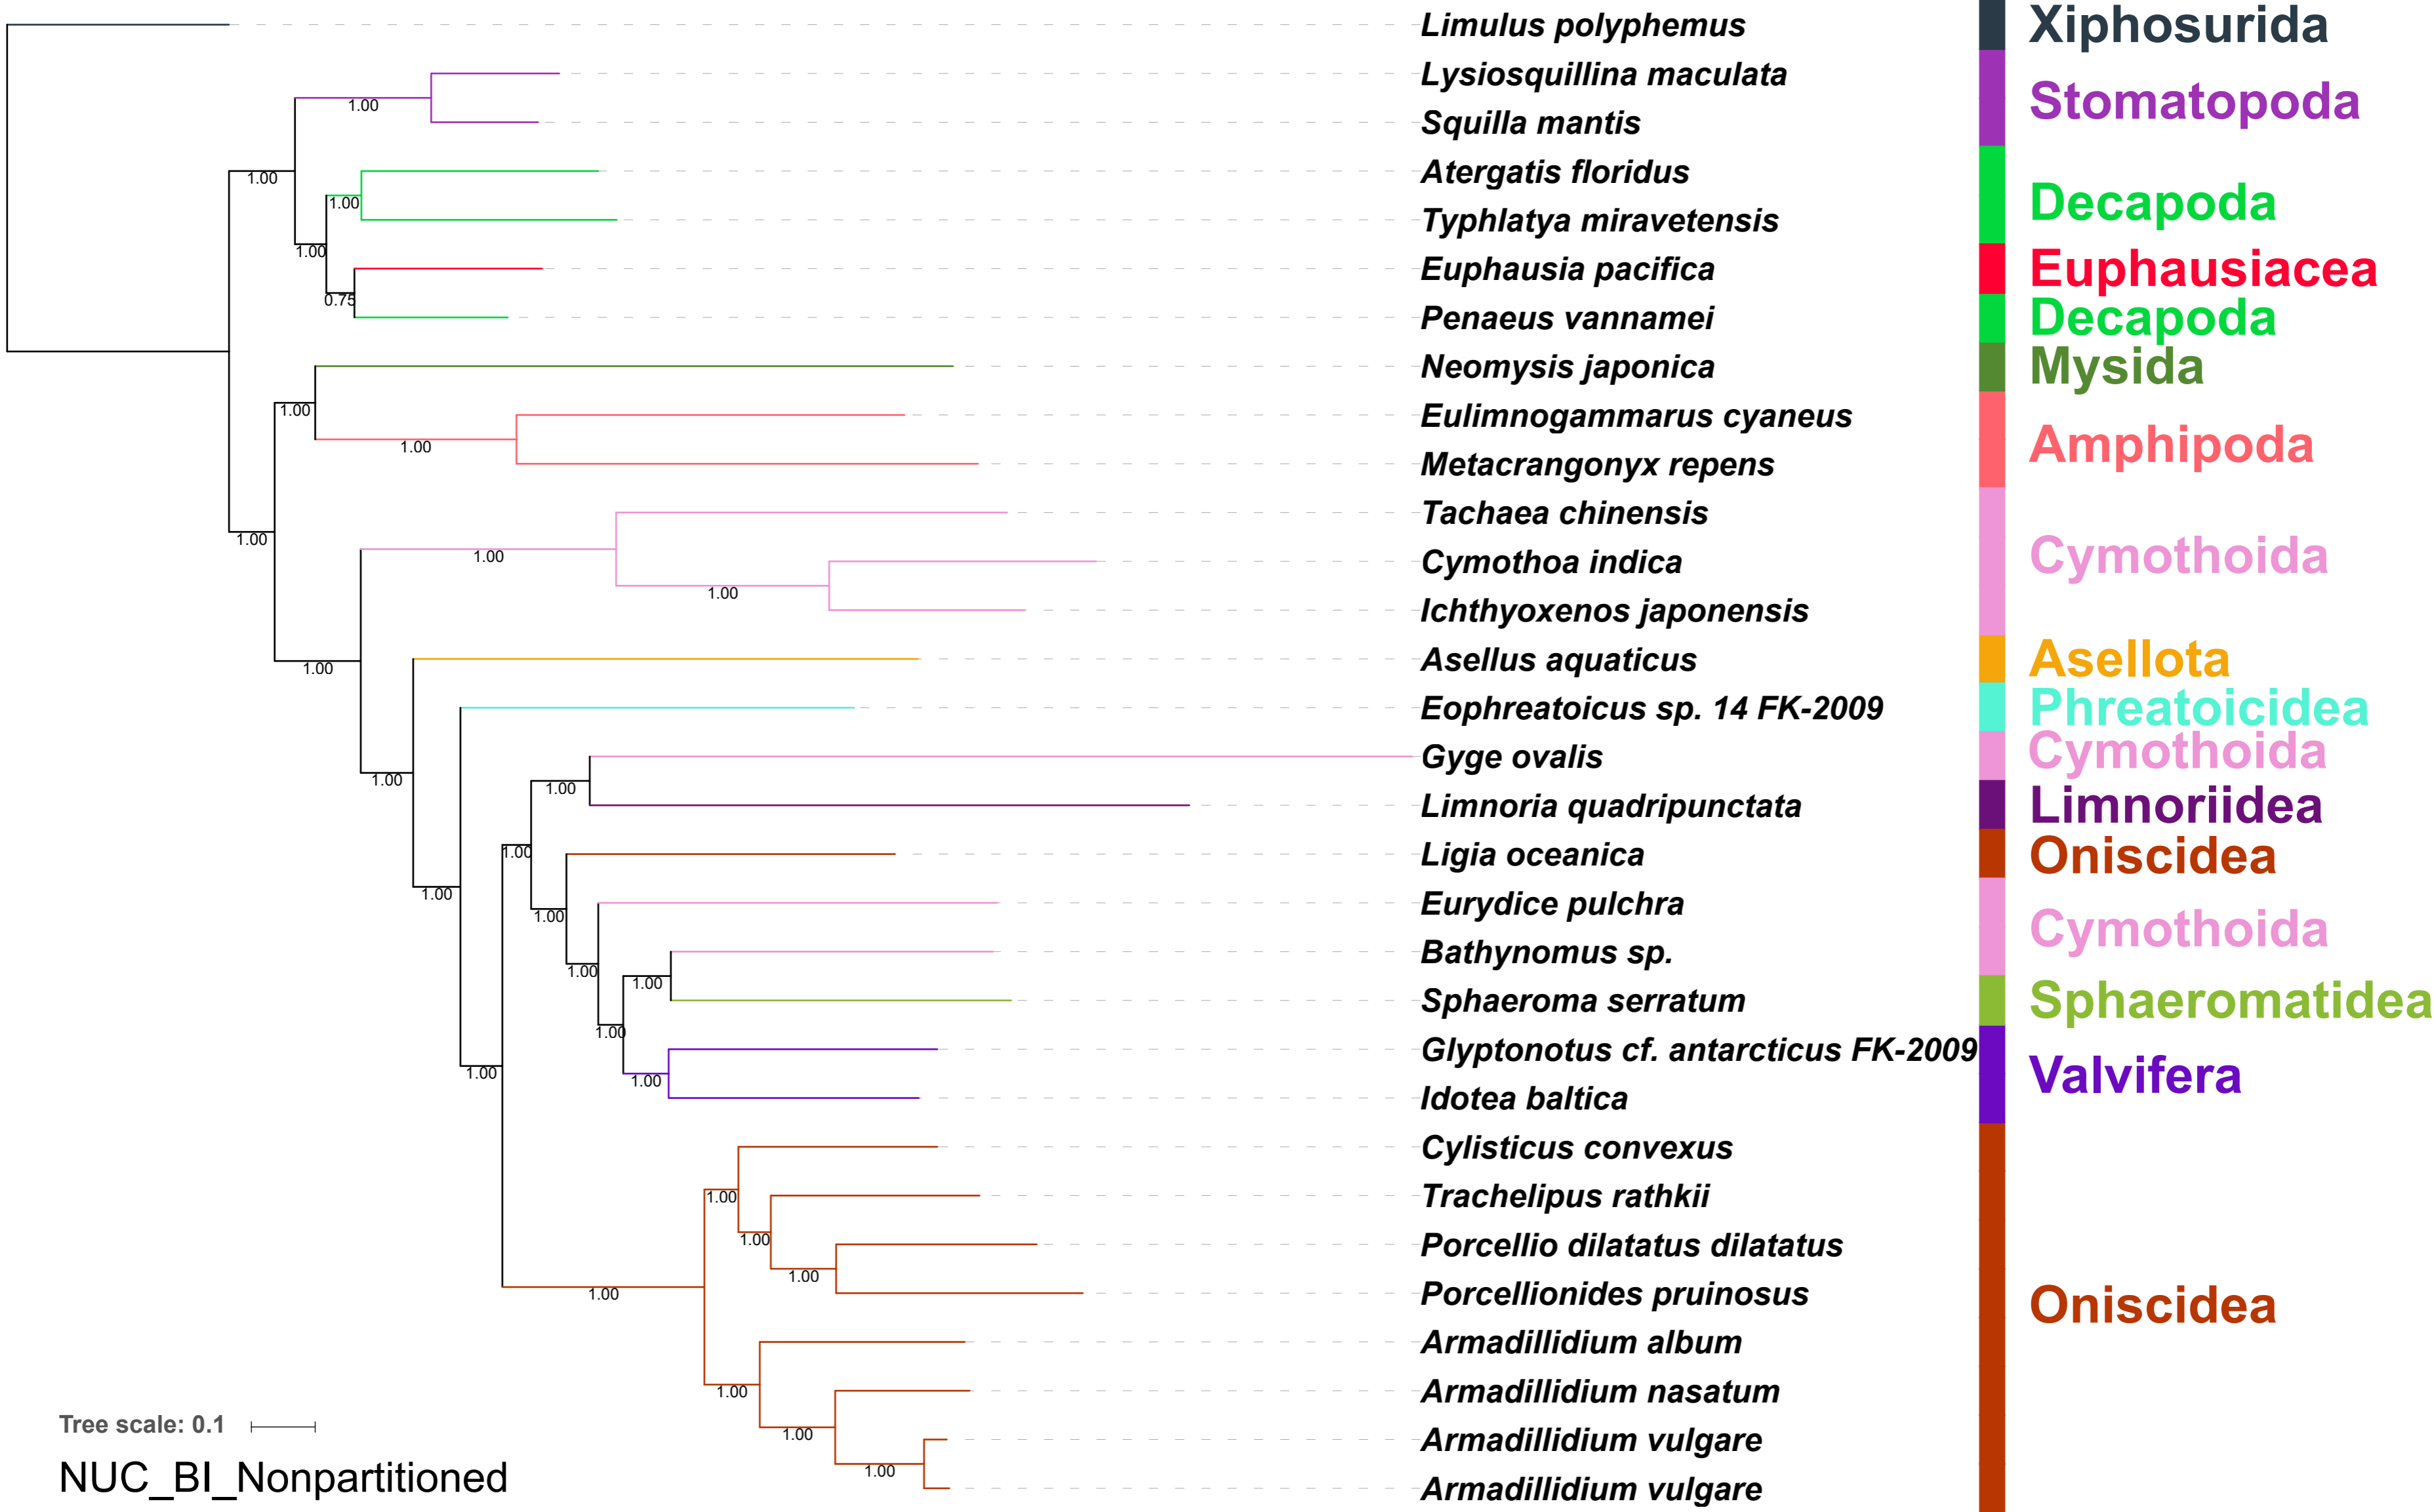

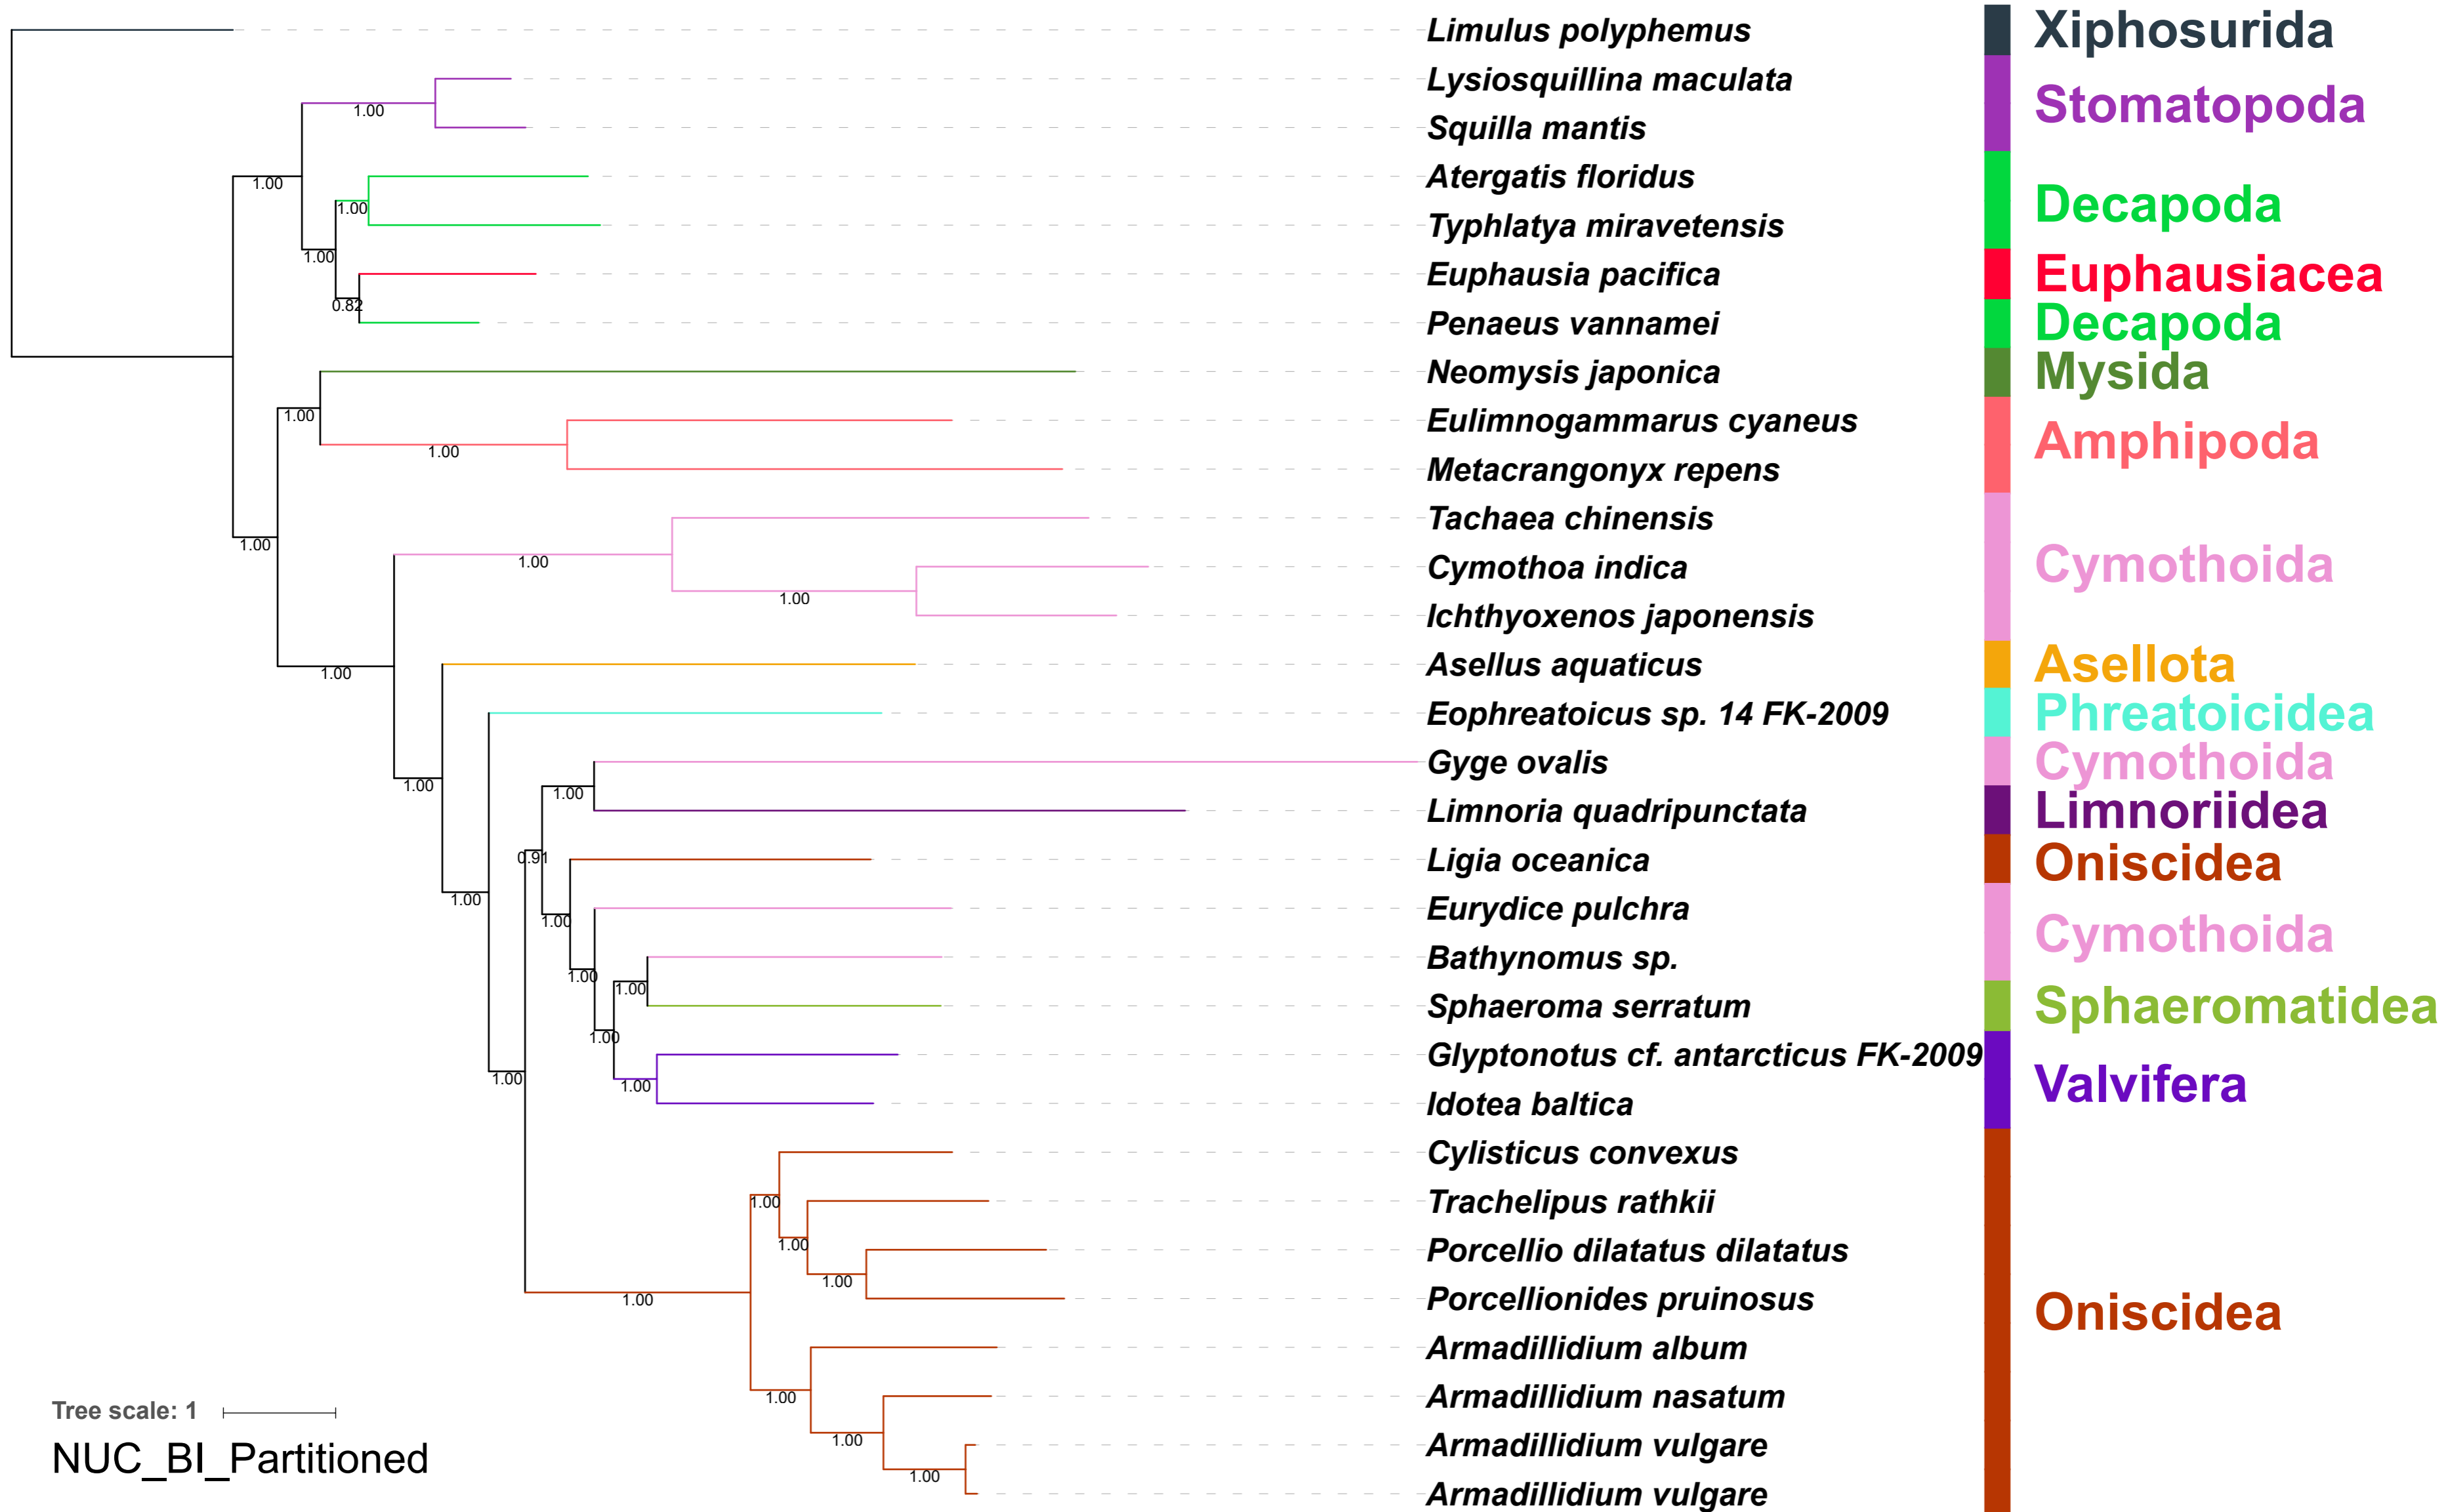

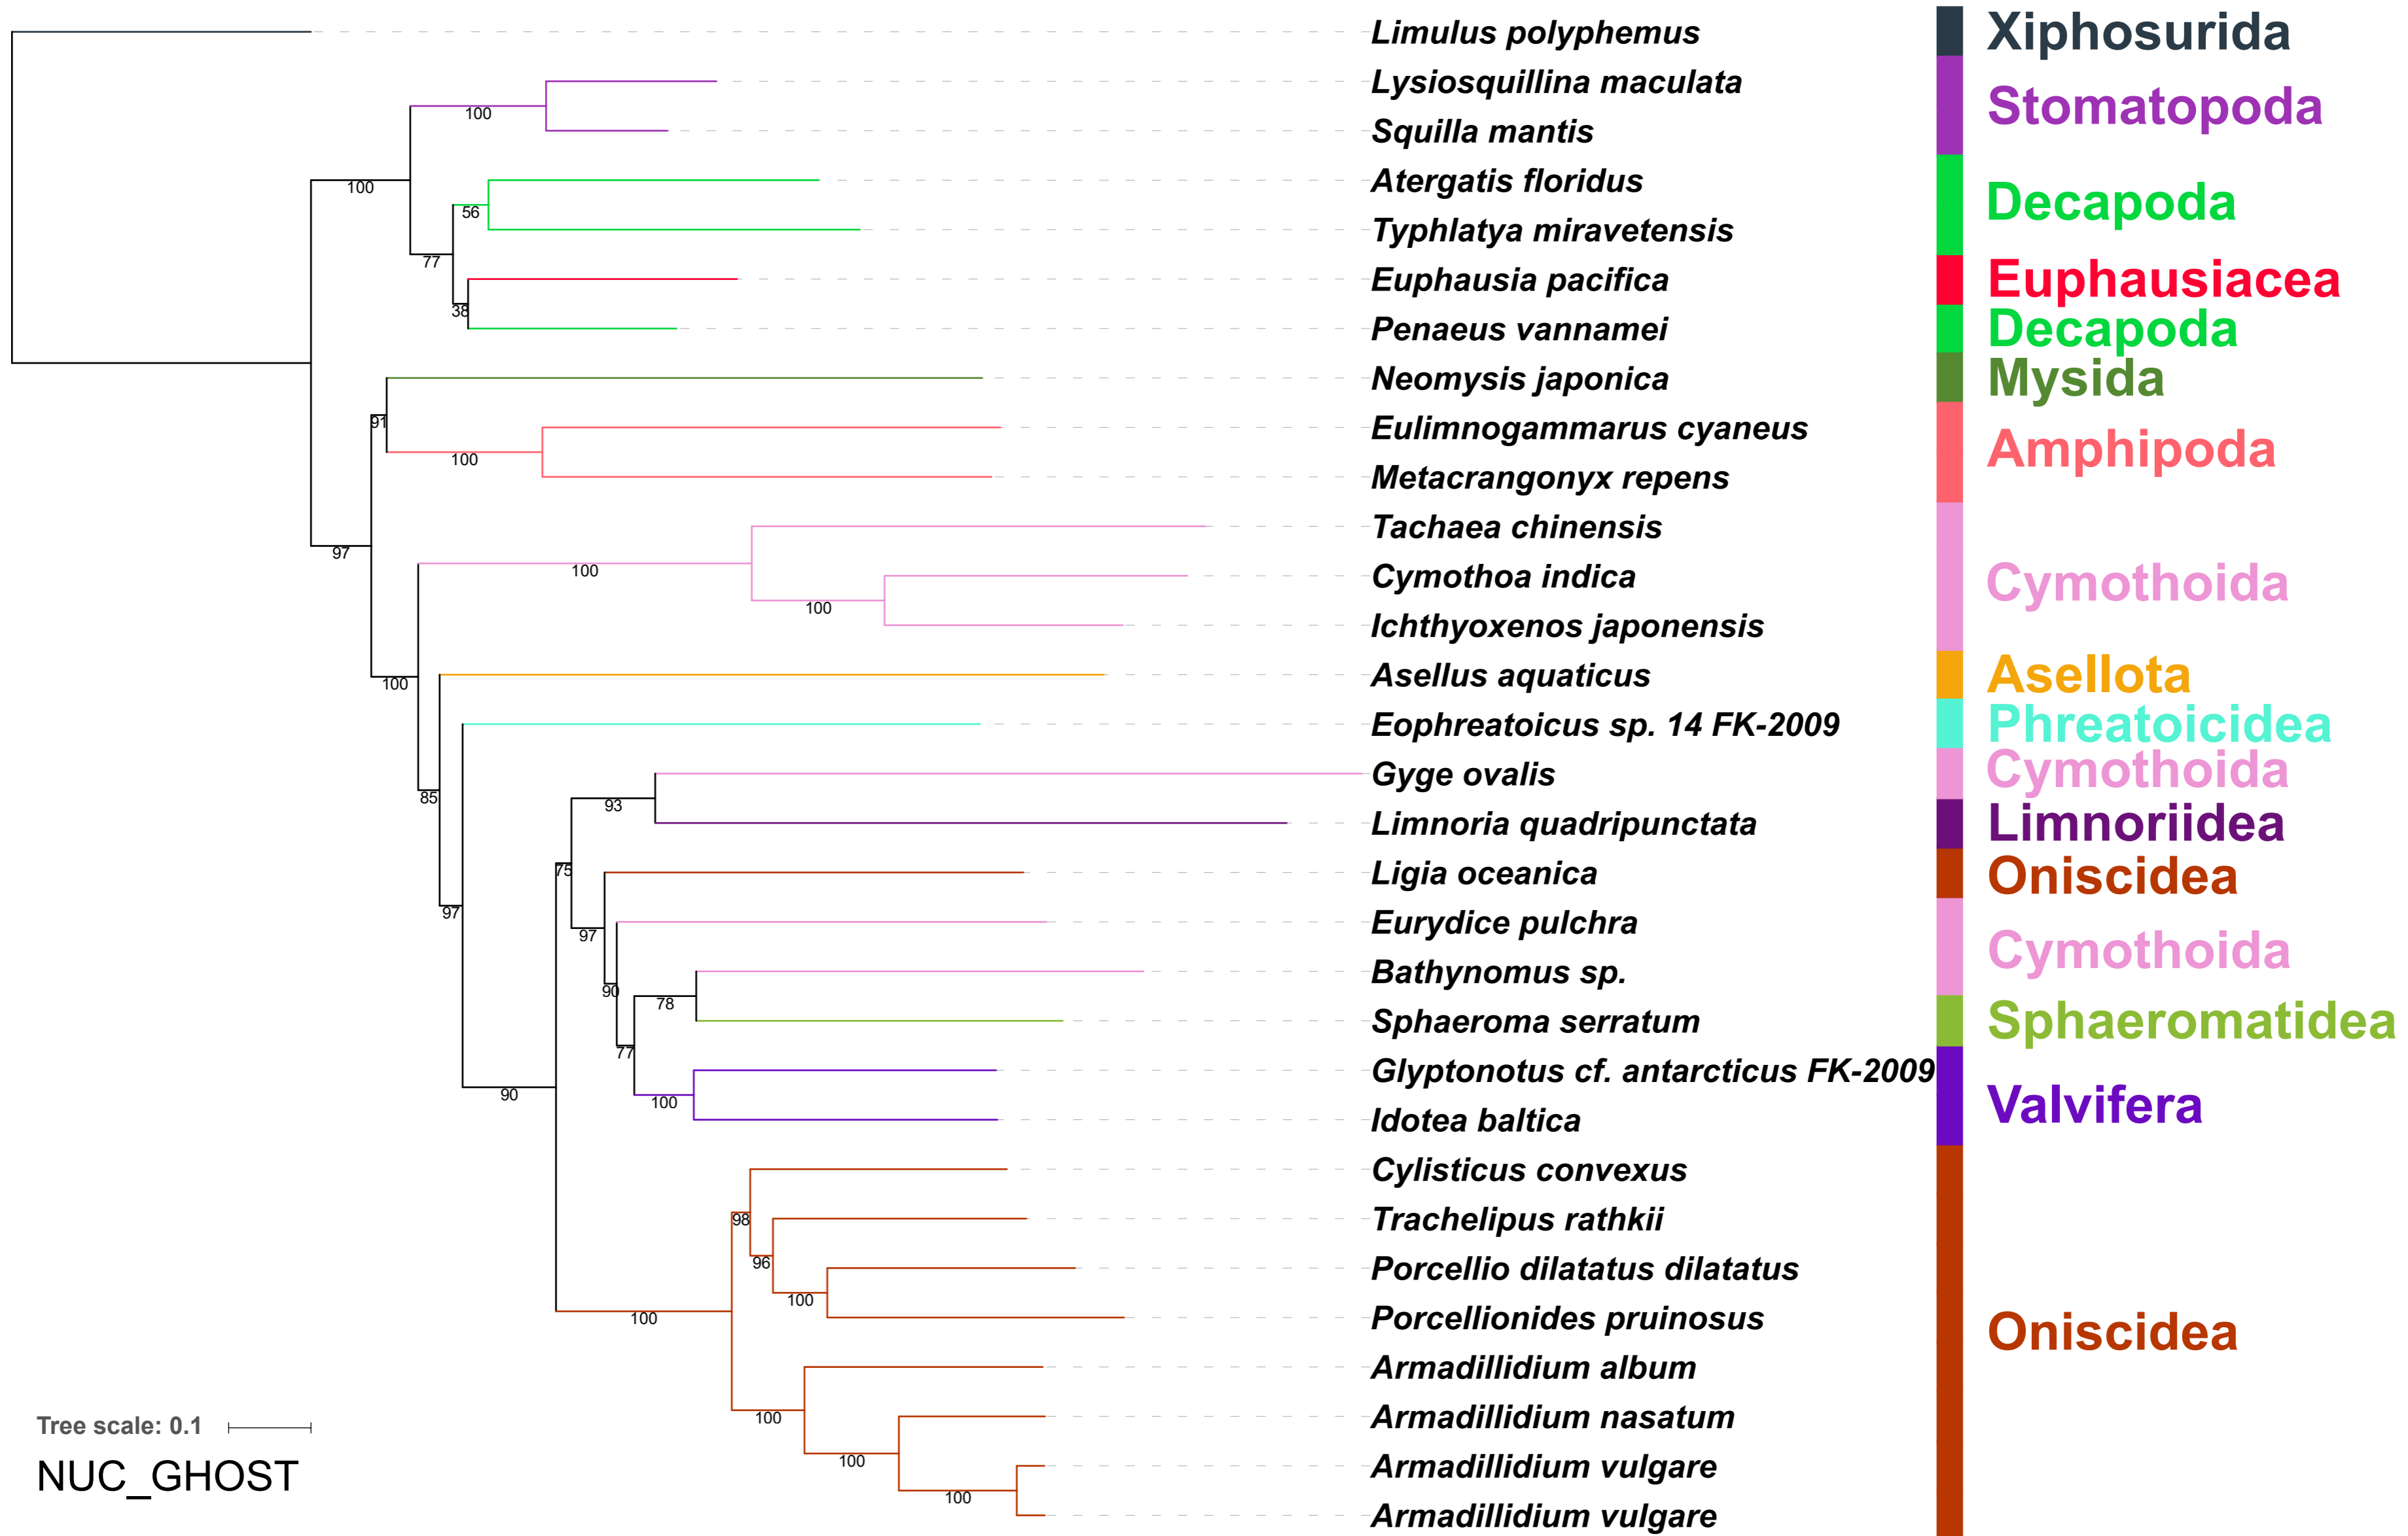

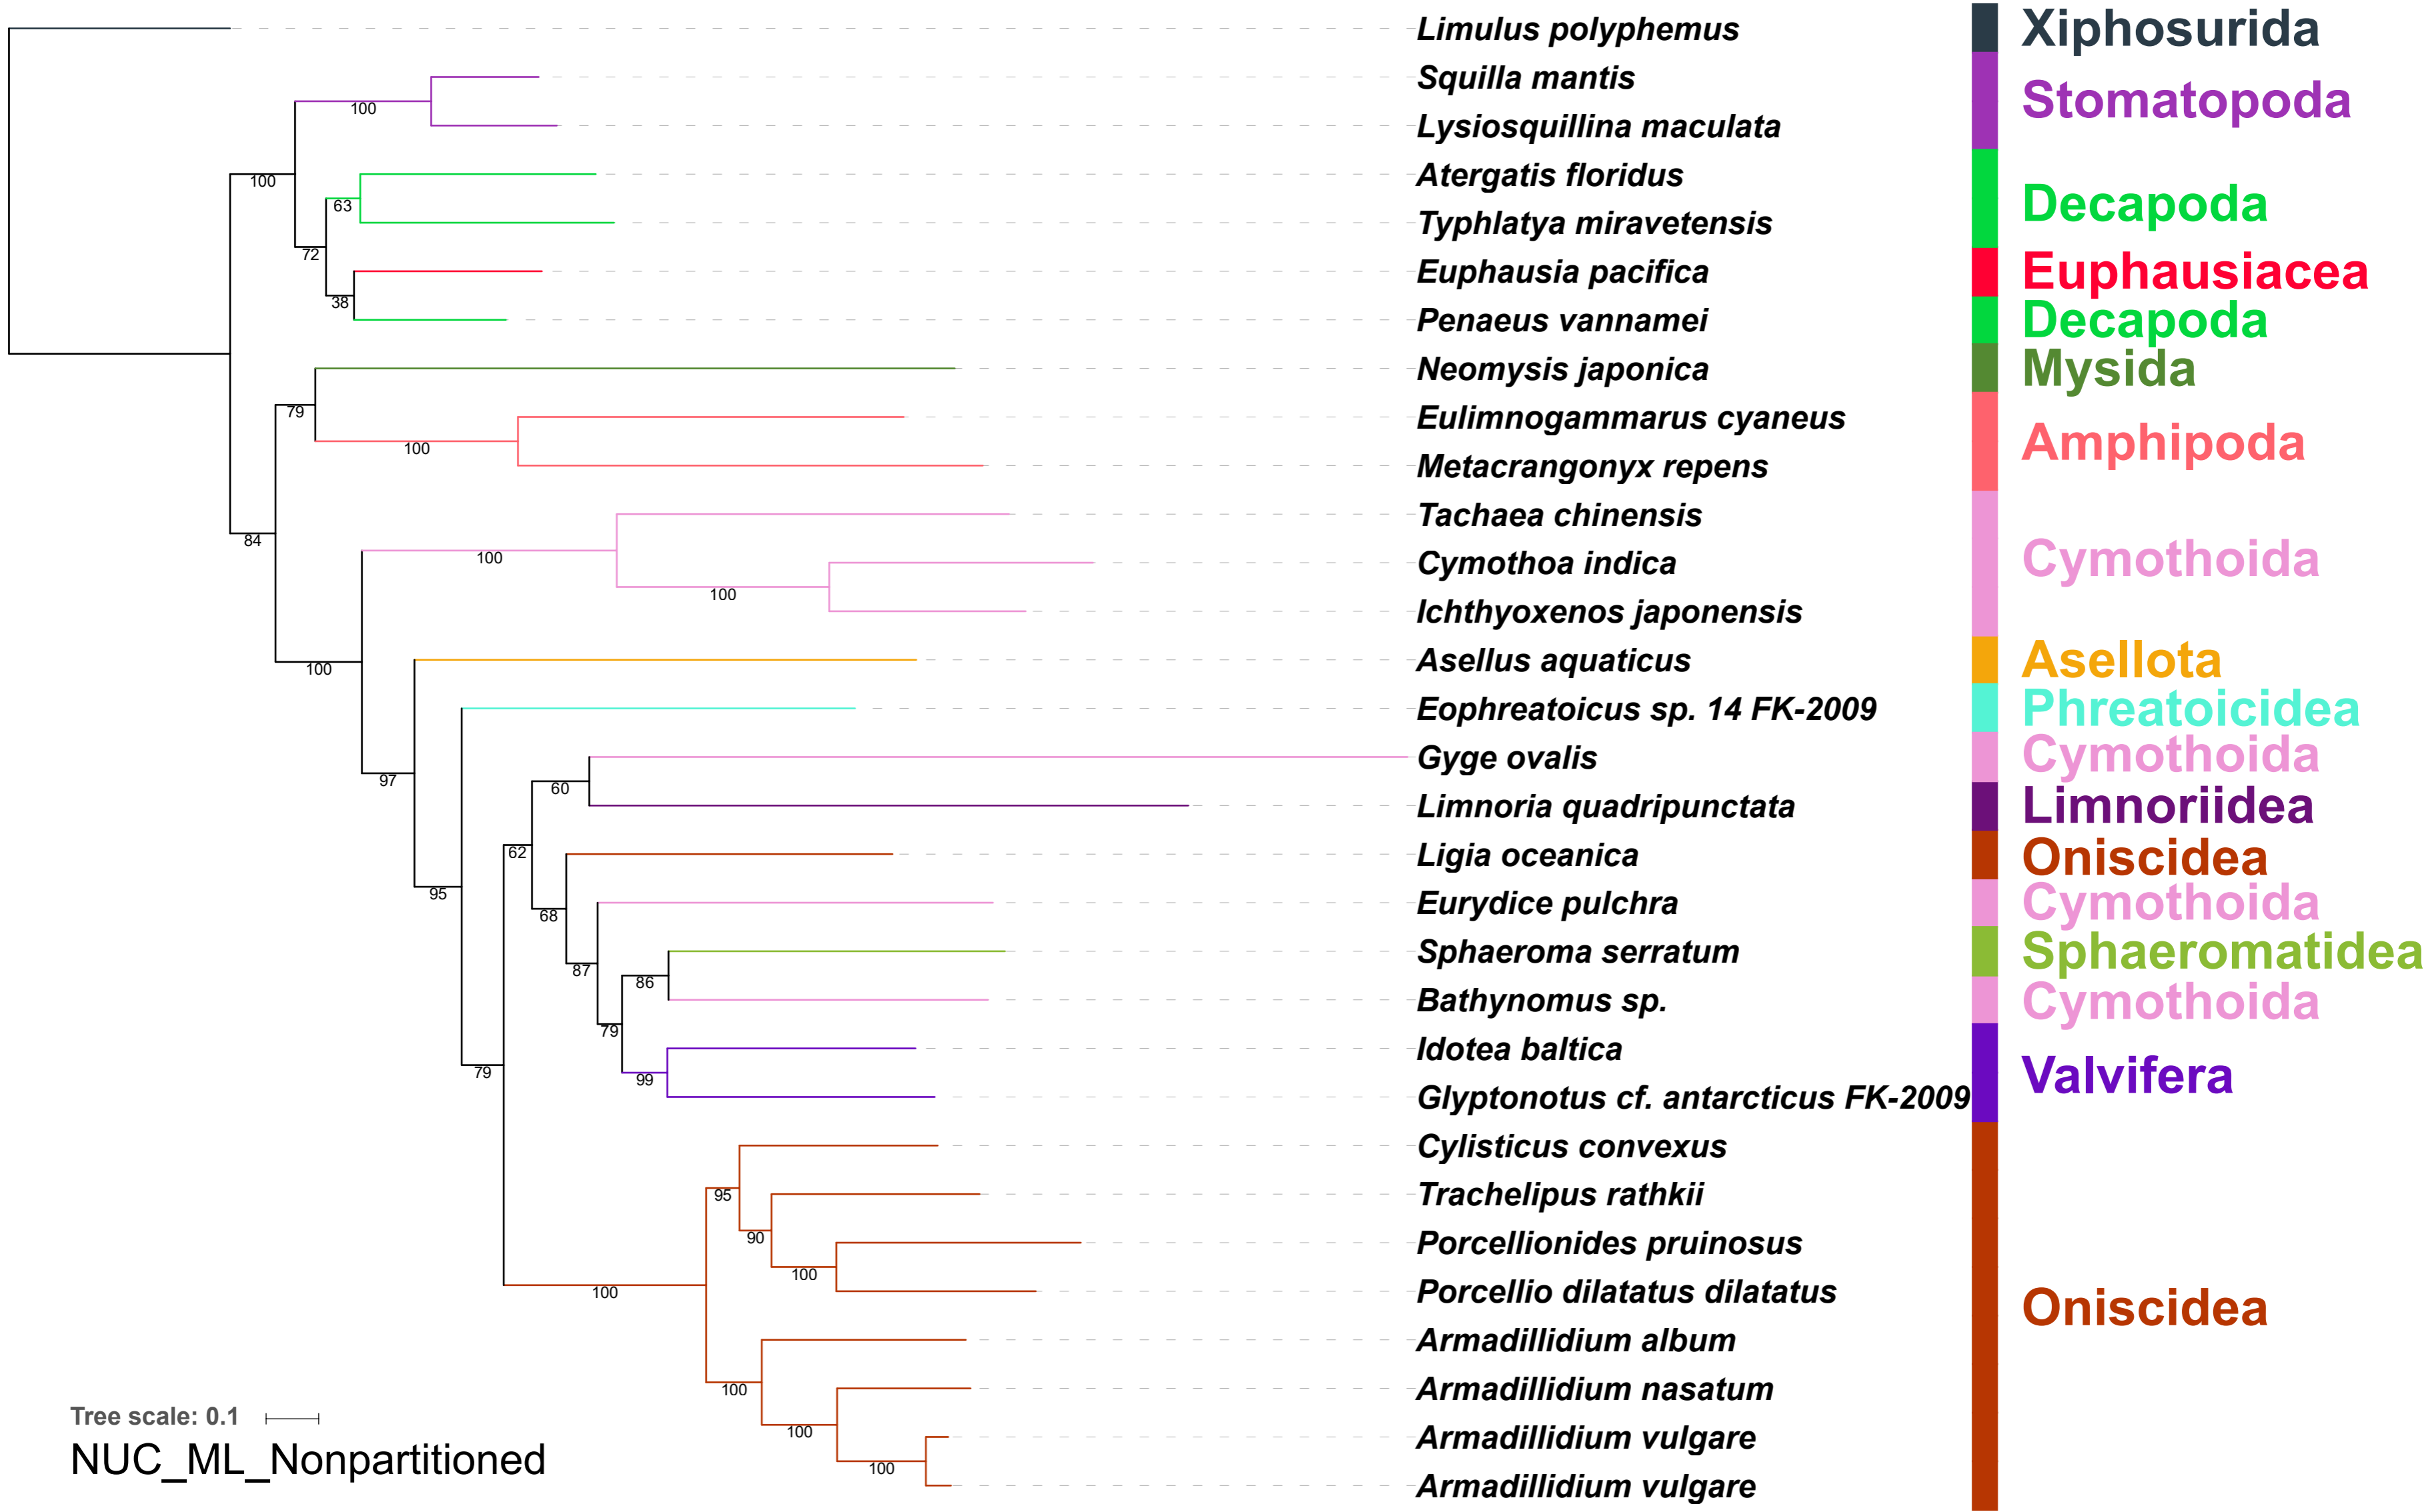

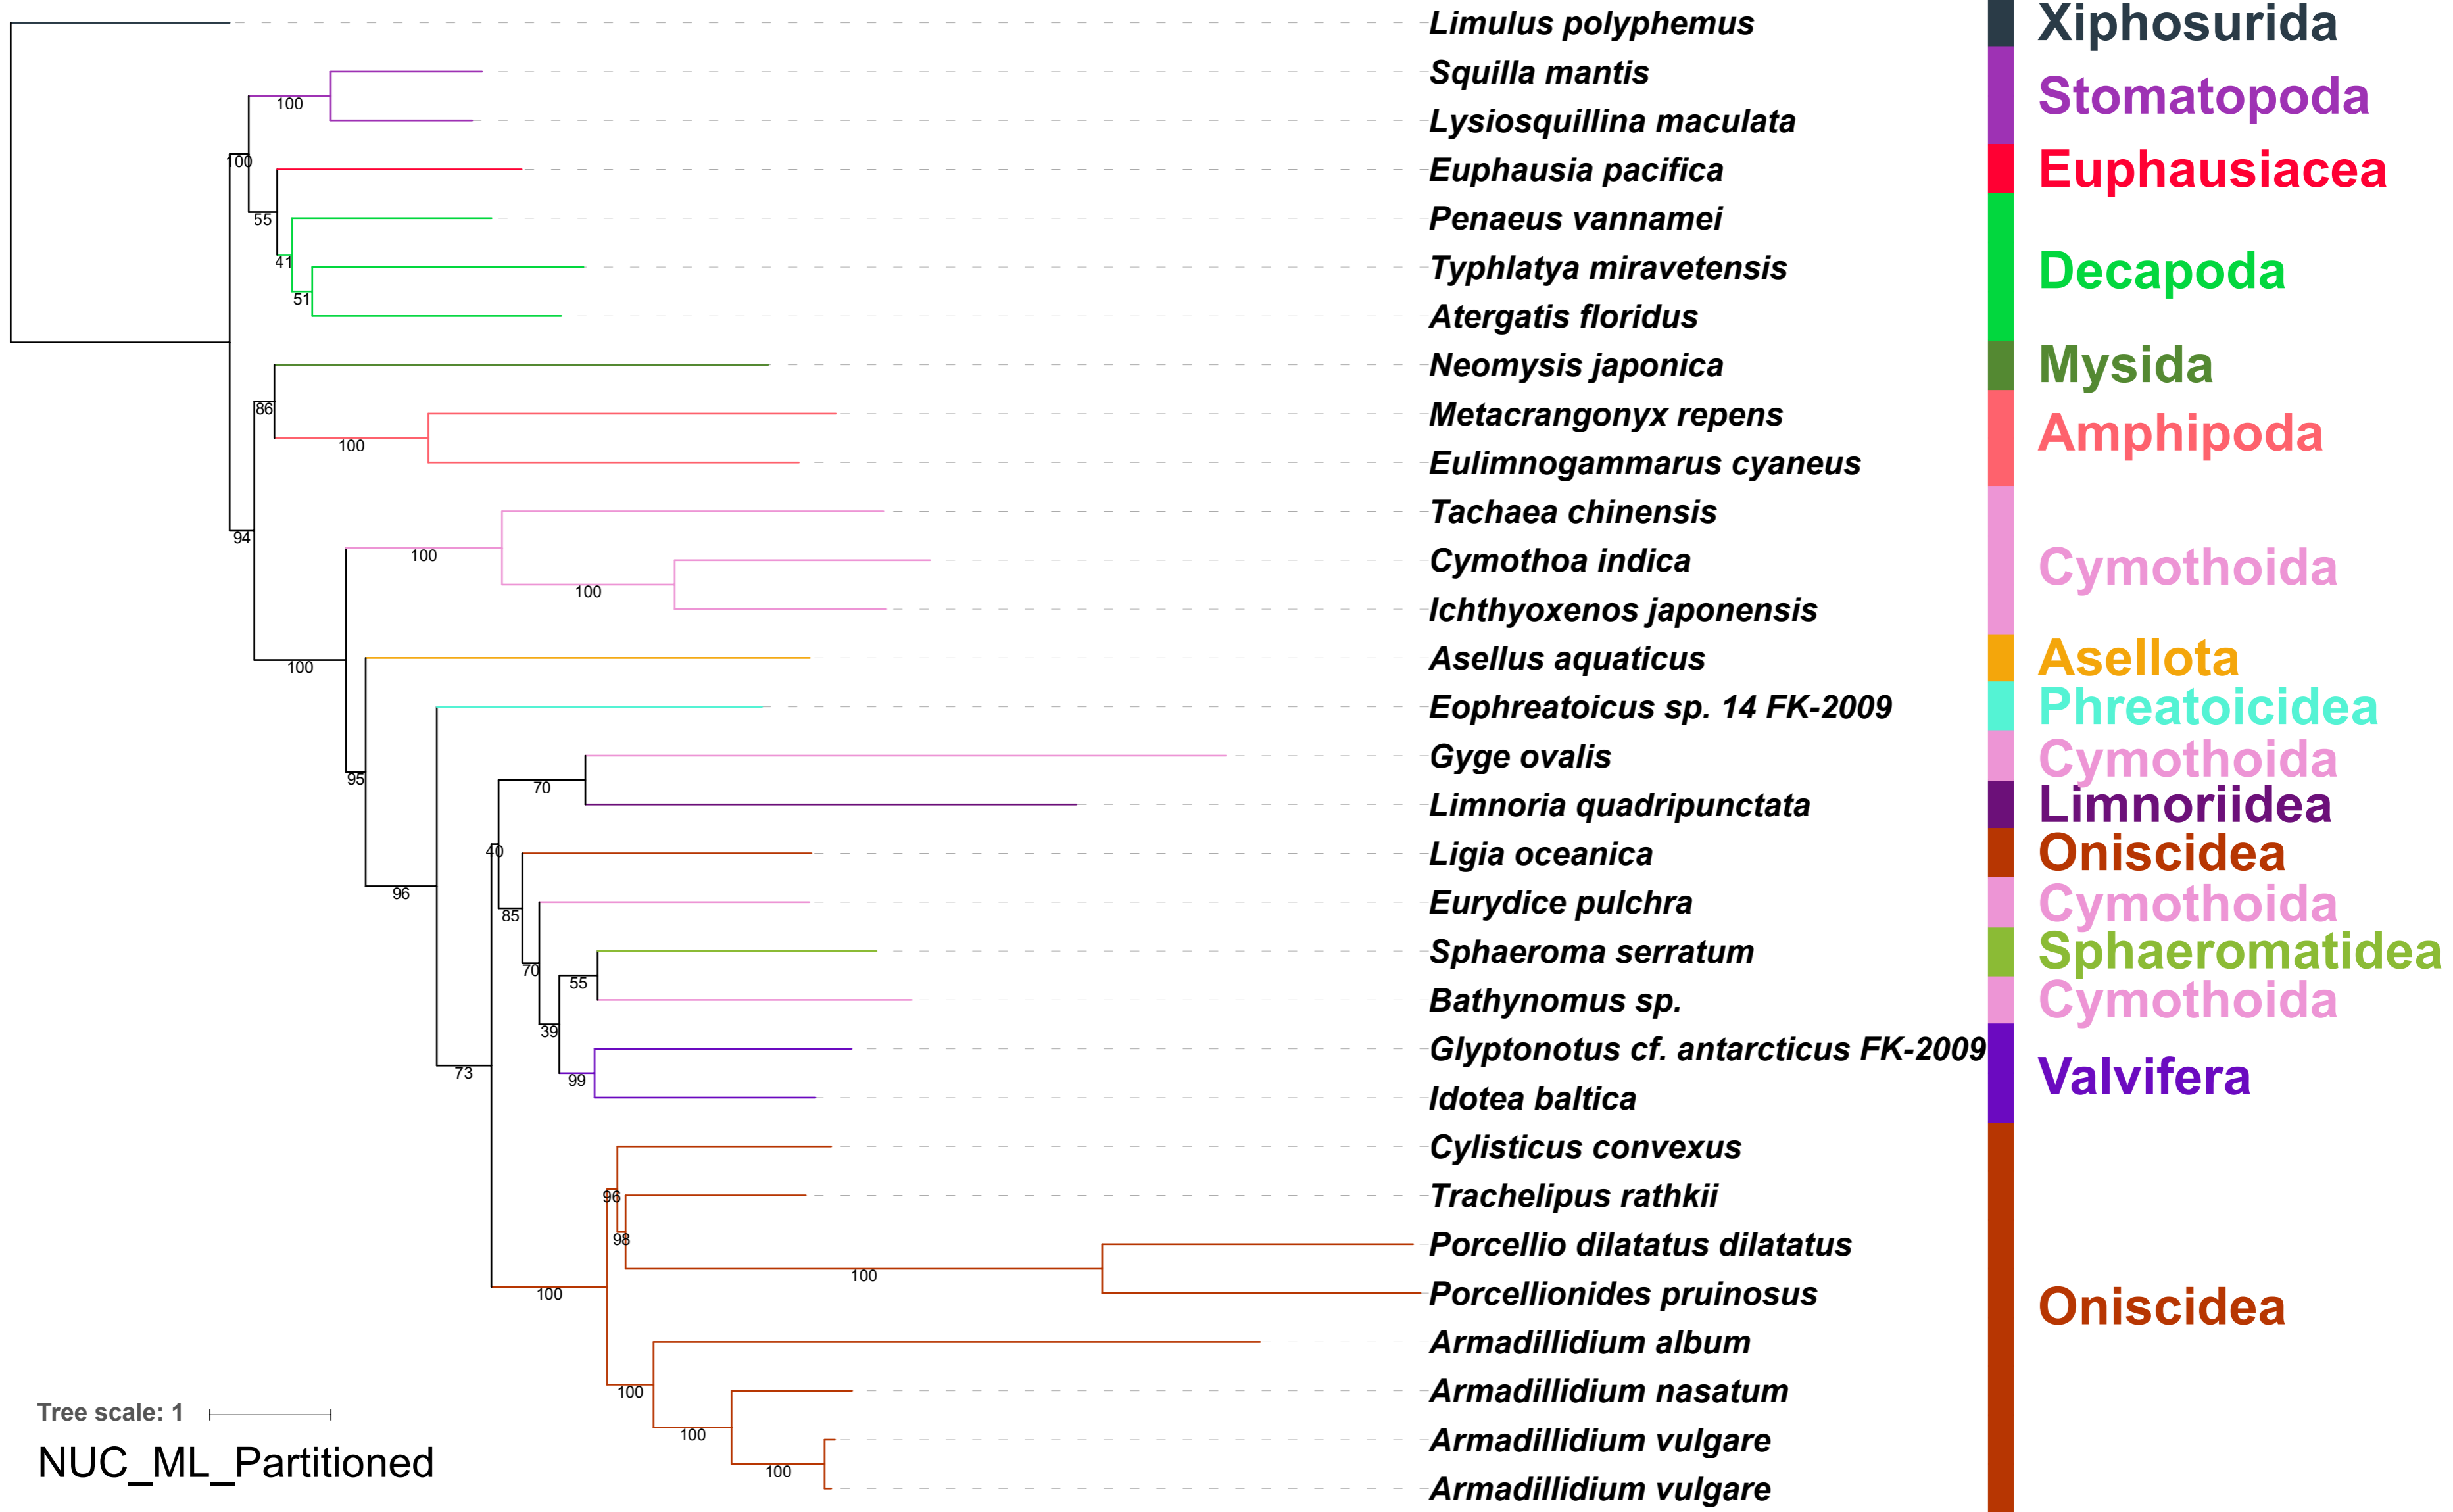

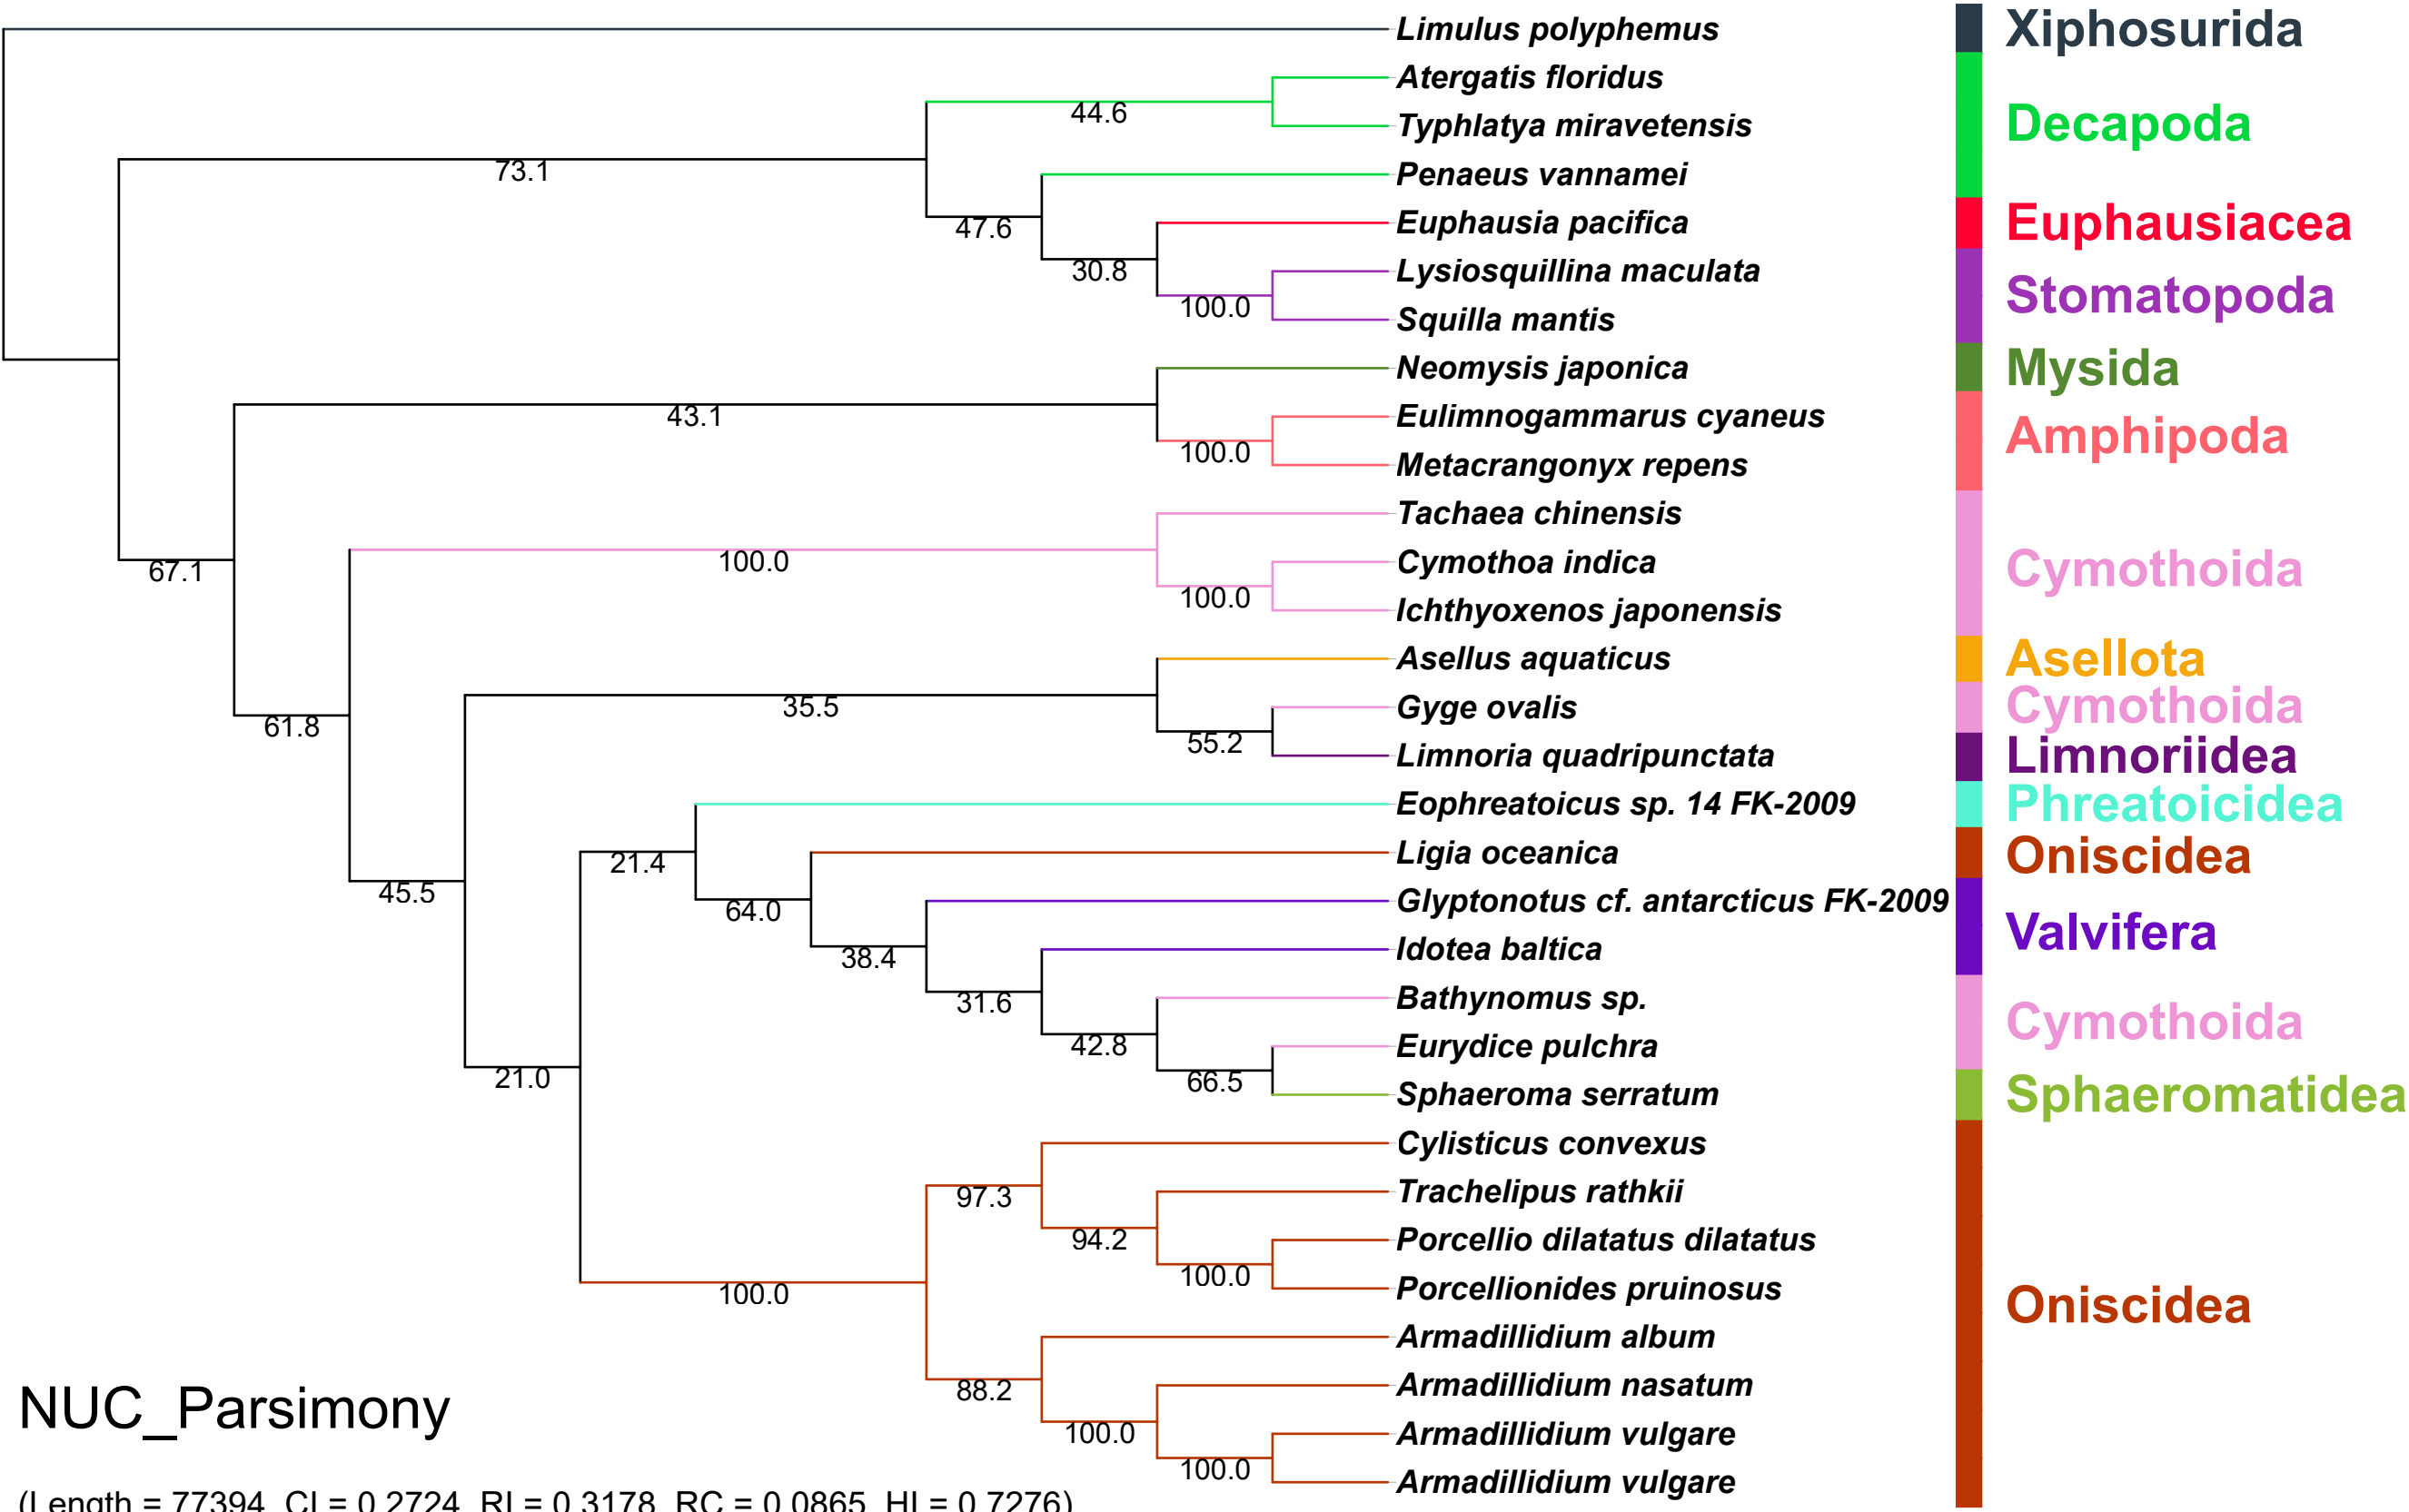

**NUC\_Parsimony**

(Length = 77394, CI = 0.2724, RI = 0.3178, RC = 0.0865, HI = 0.7276)

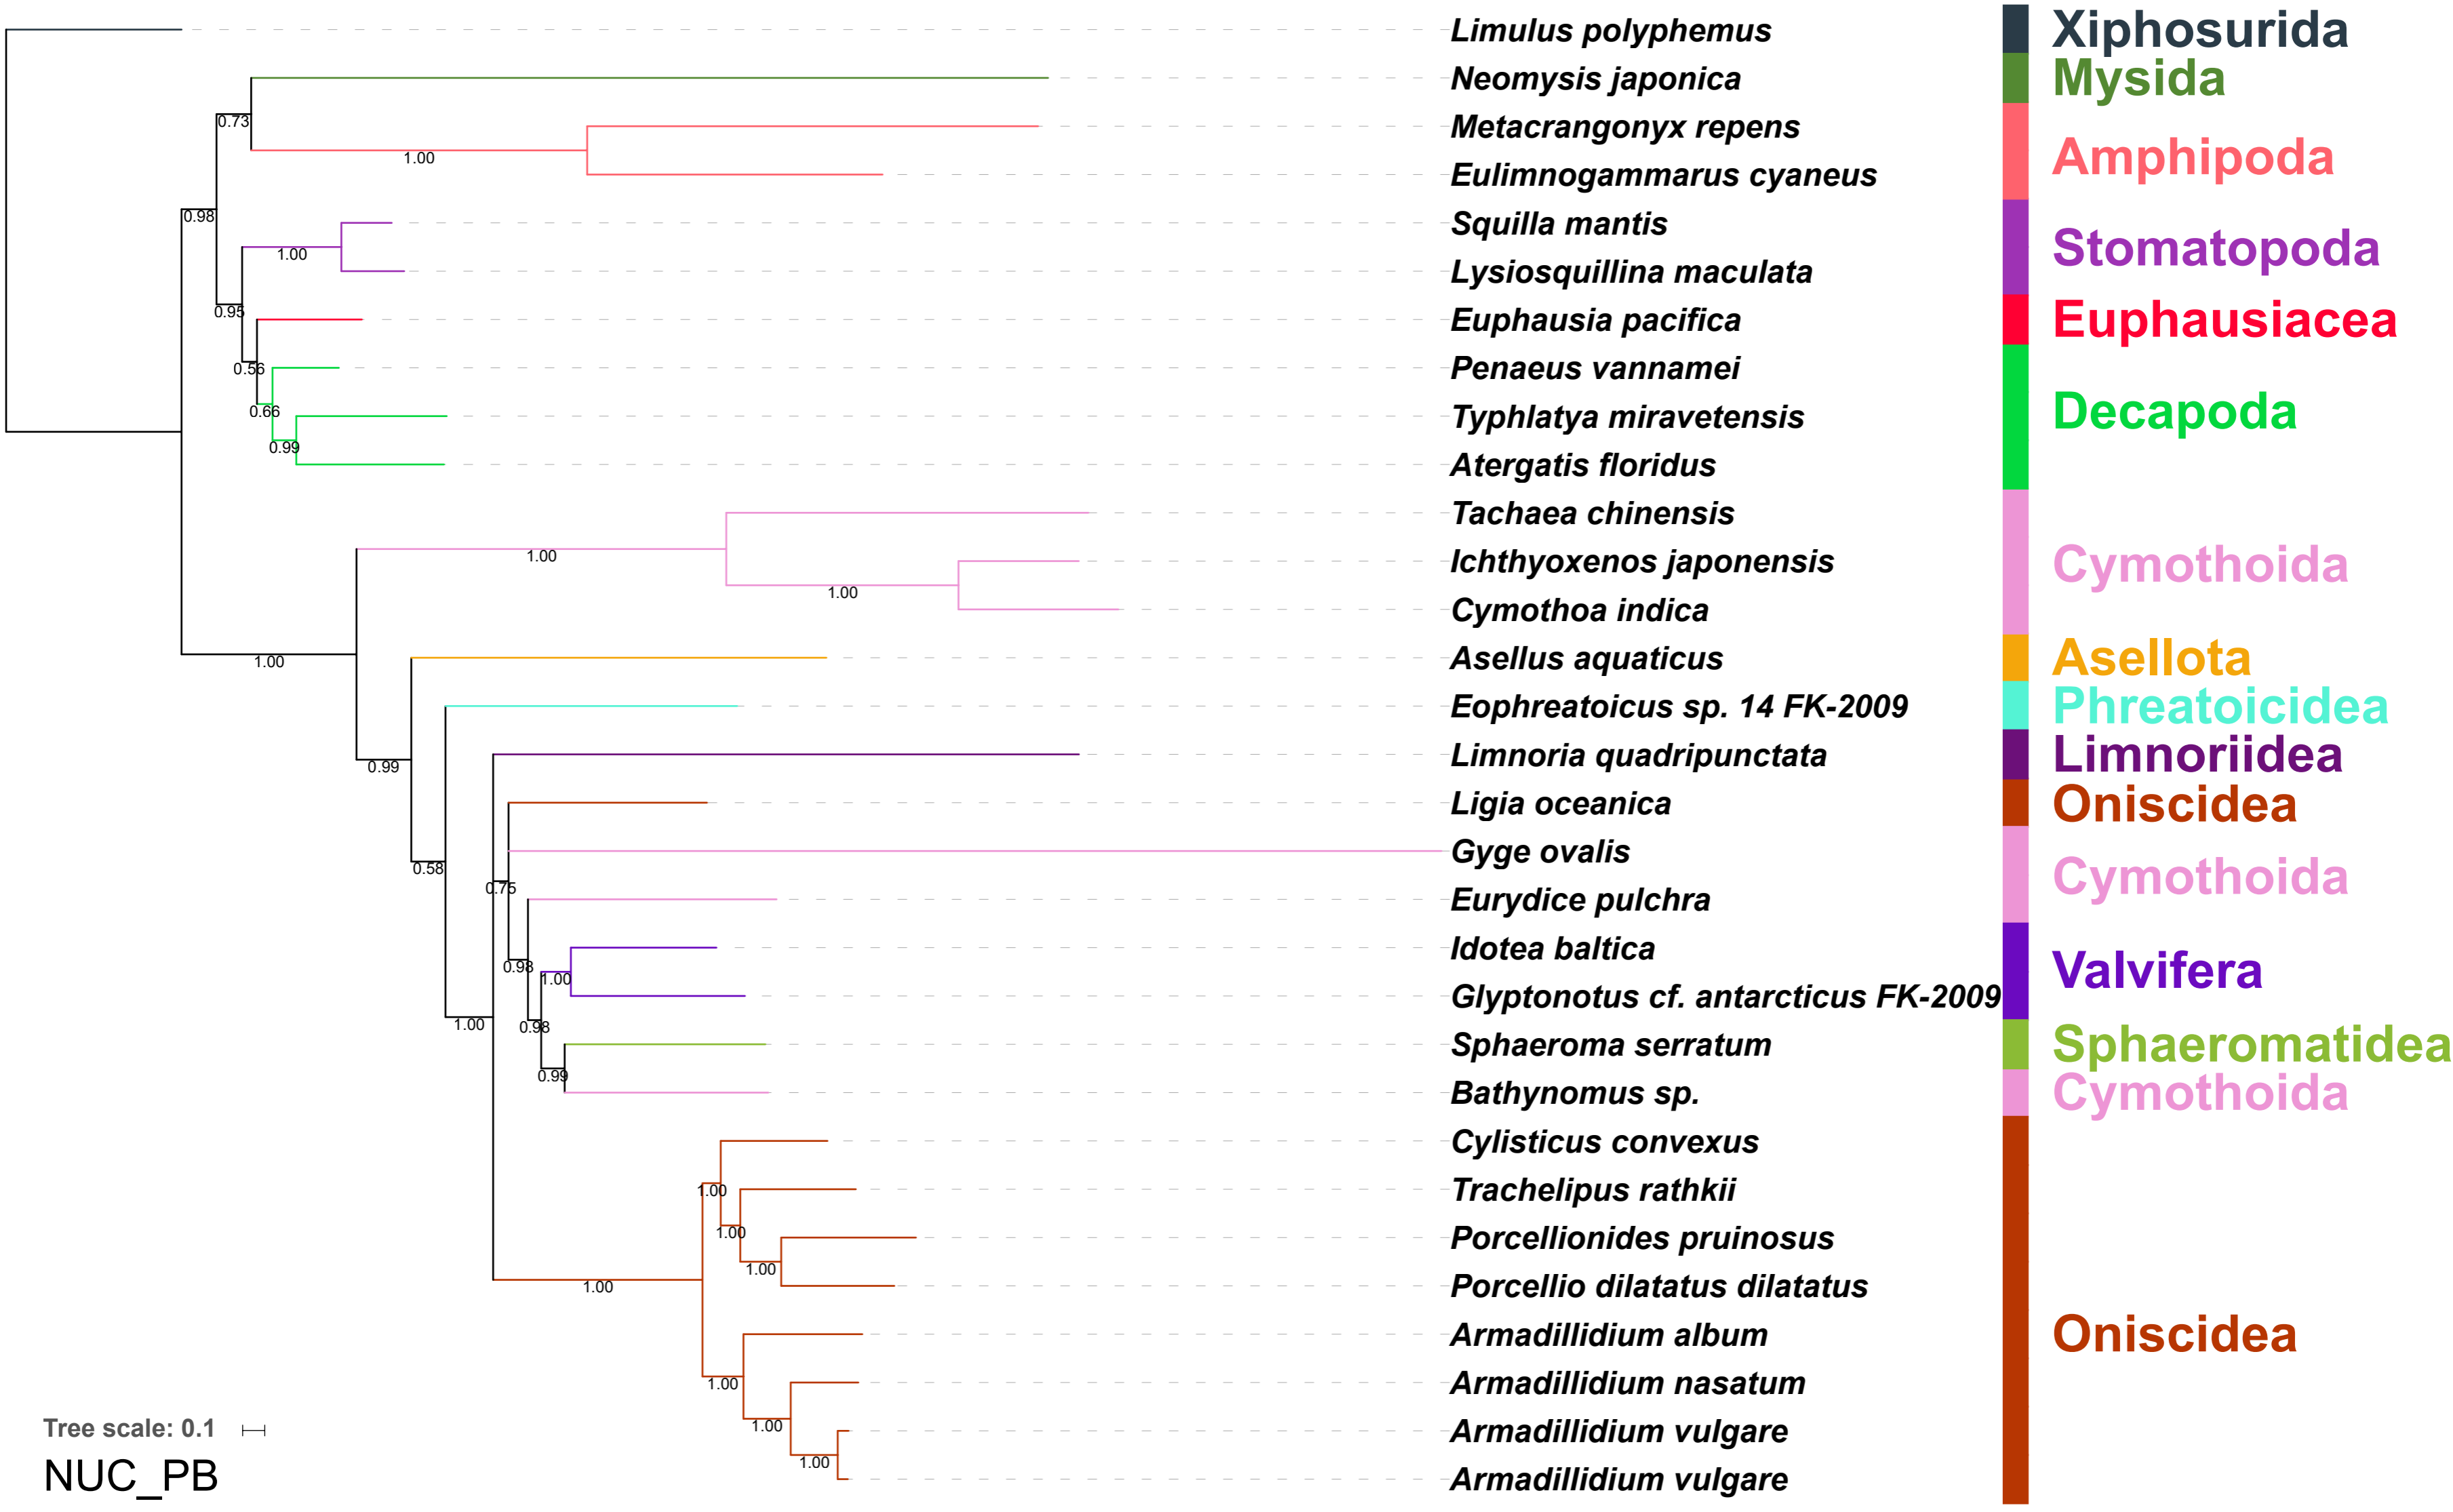

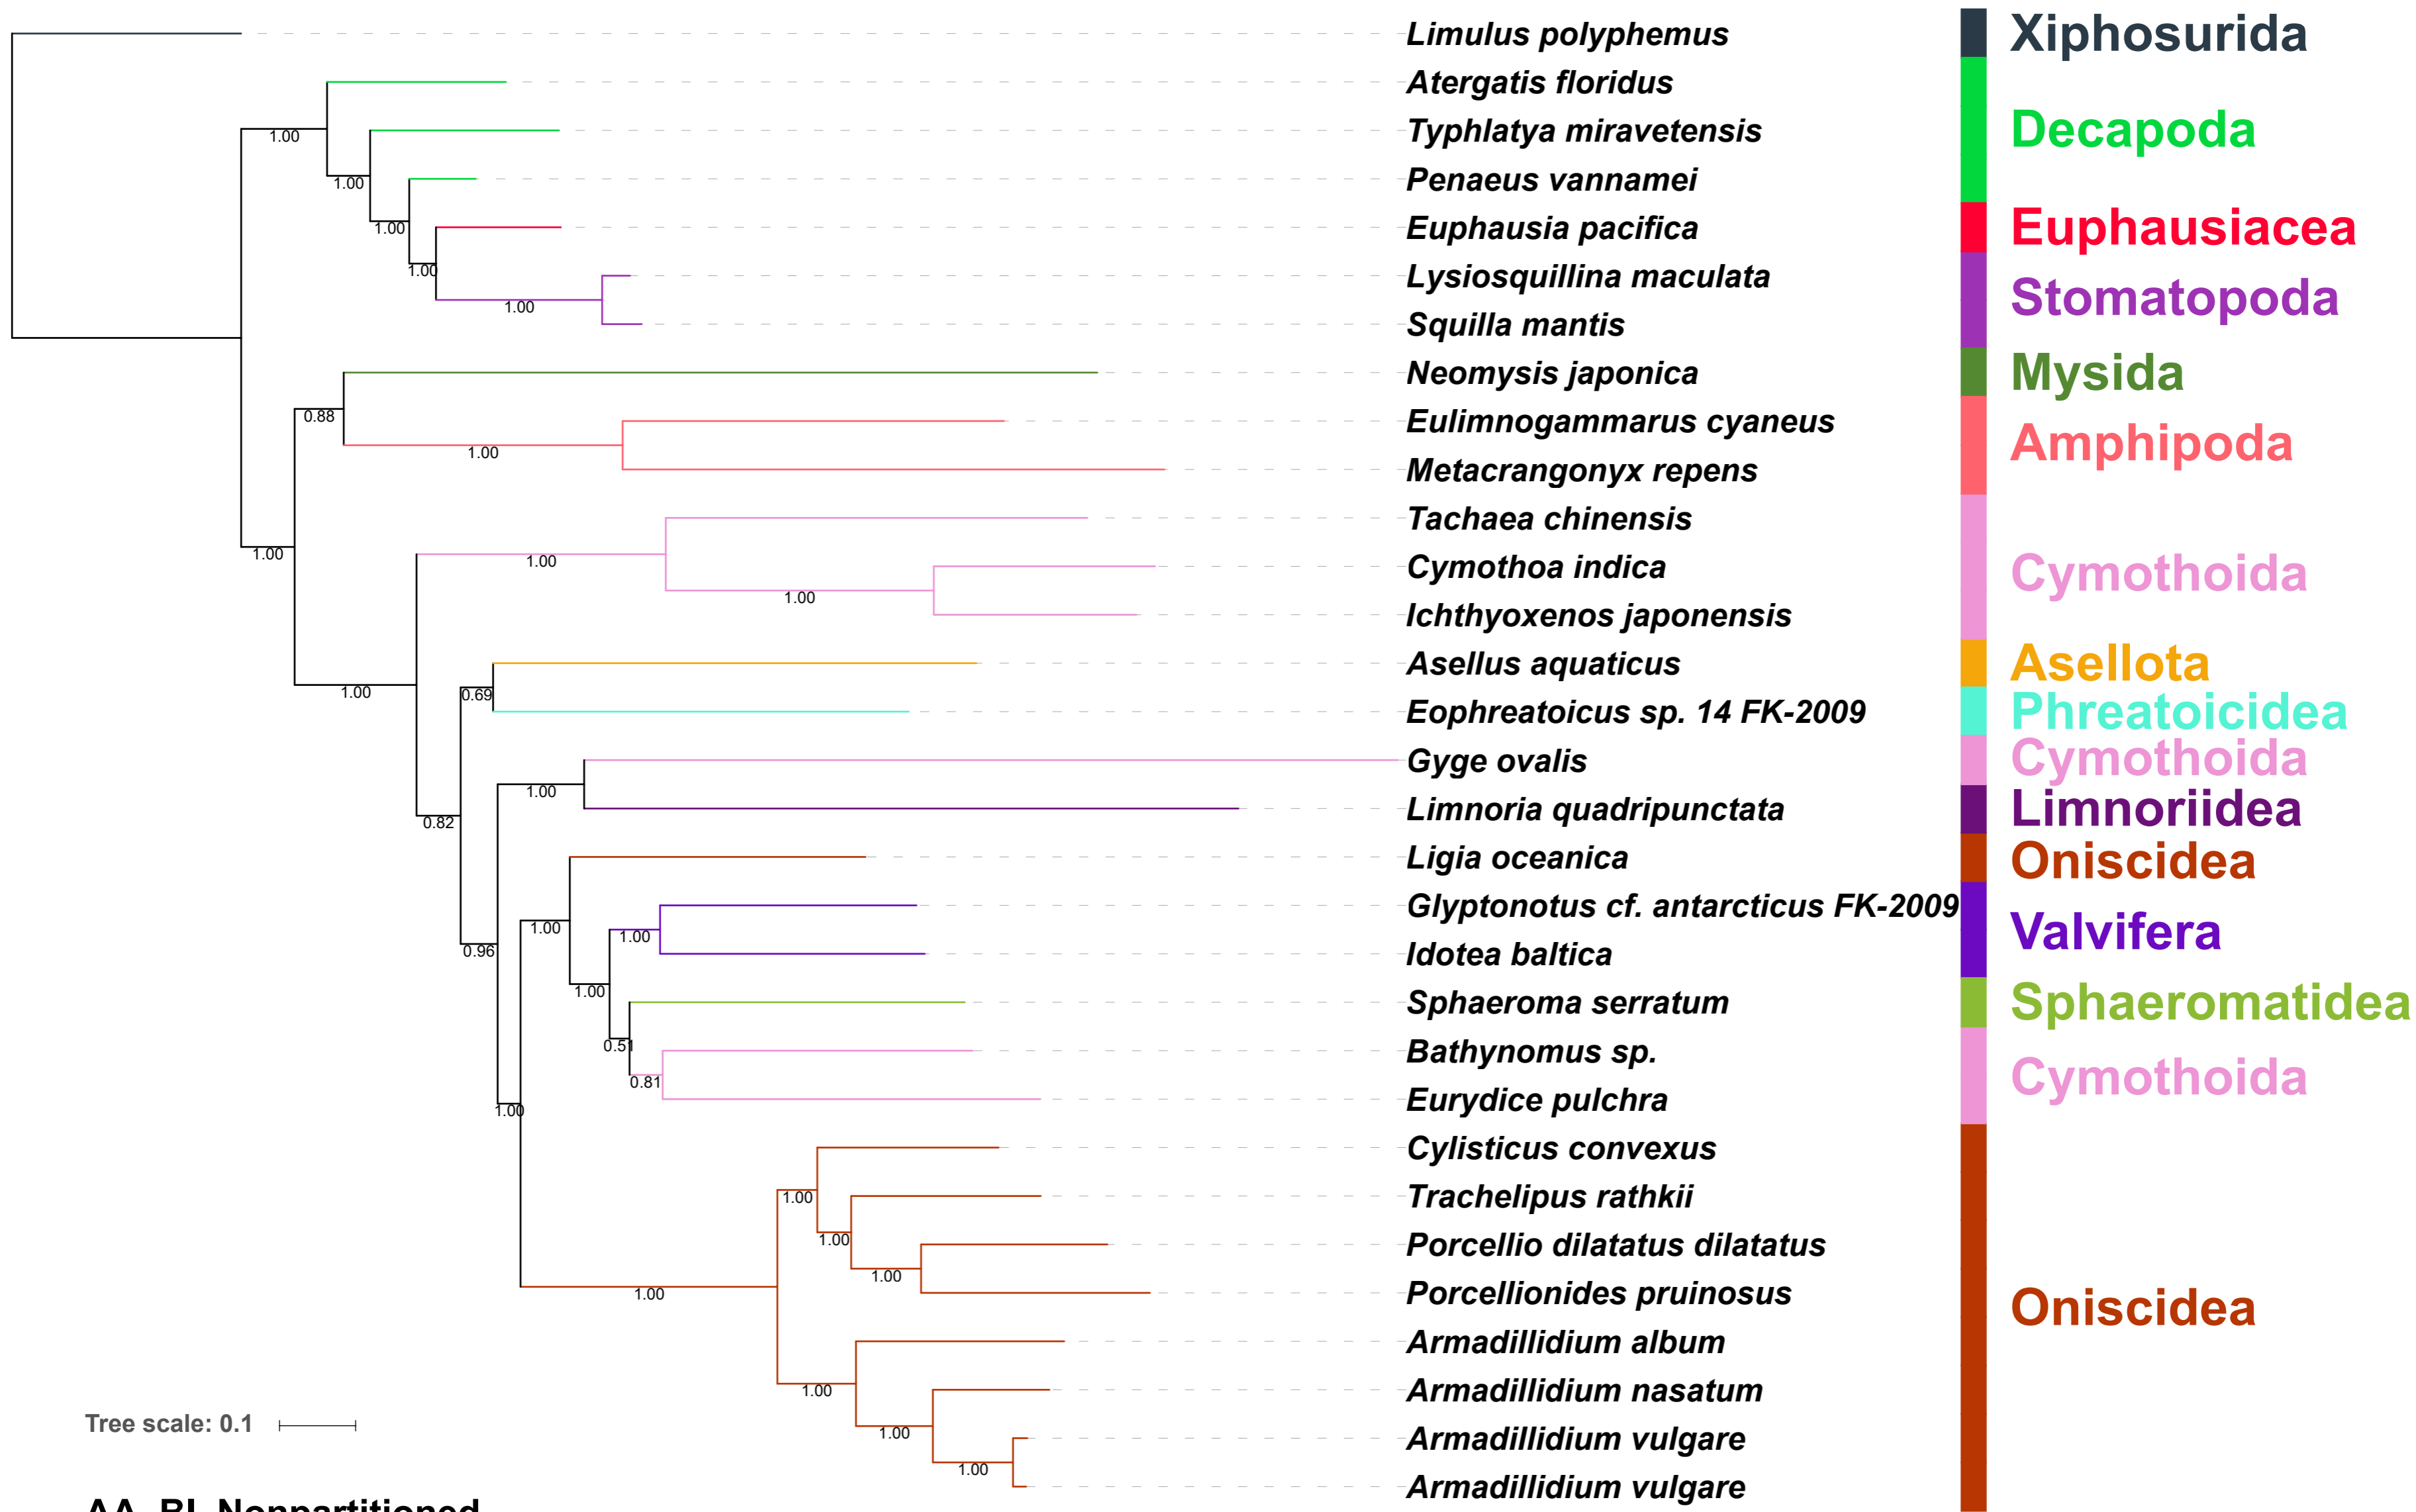

AA\_BI\_Nonpartitioned



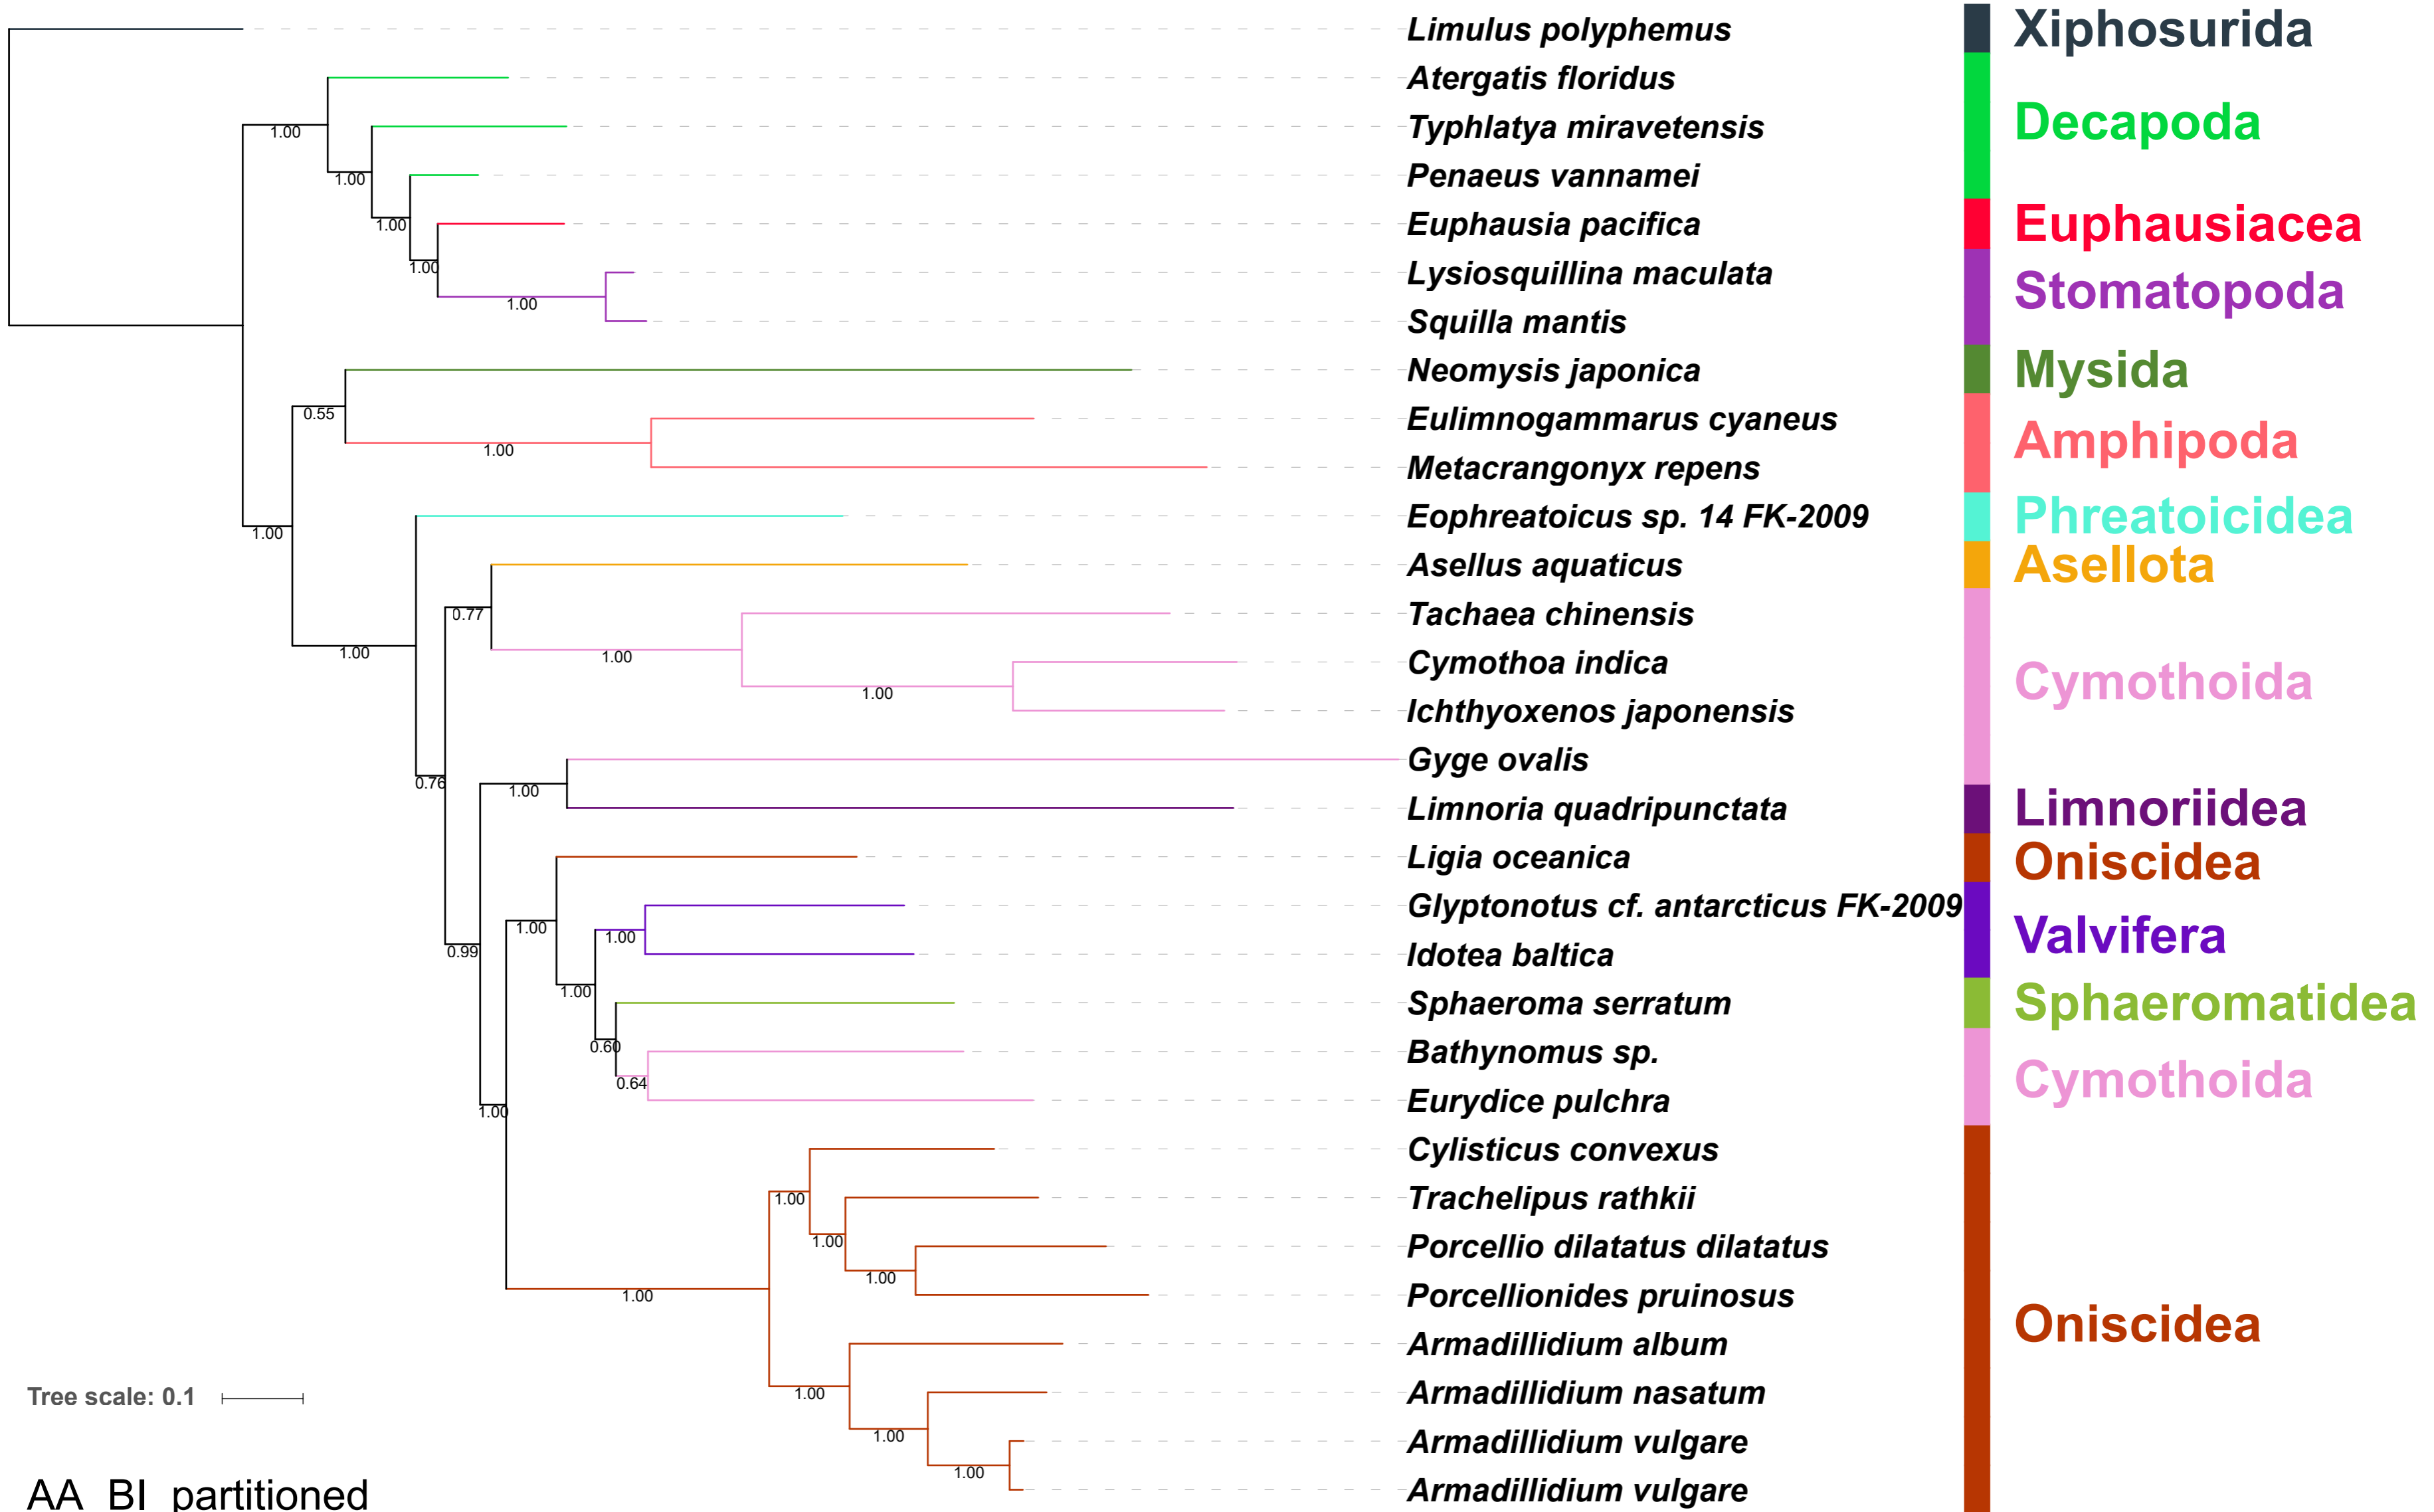

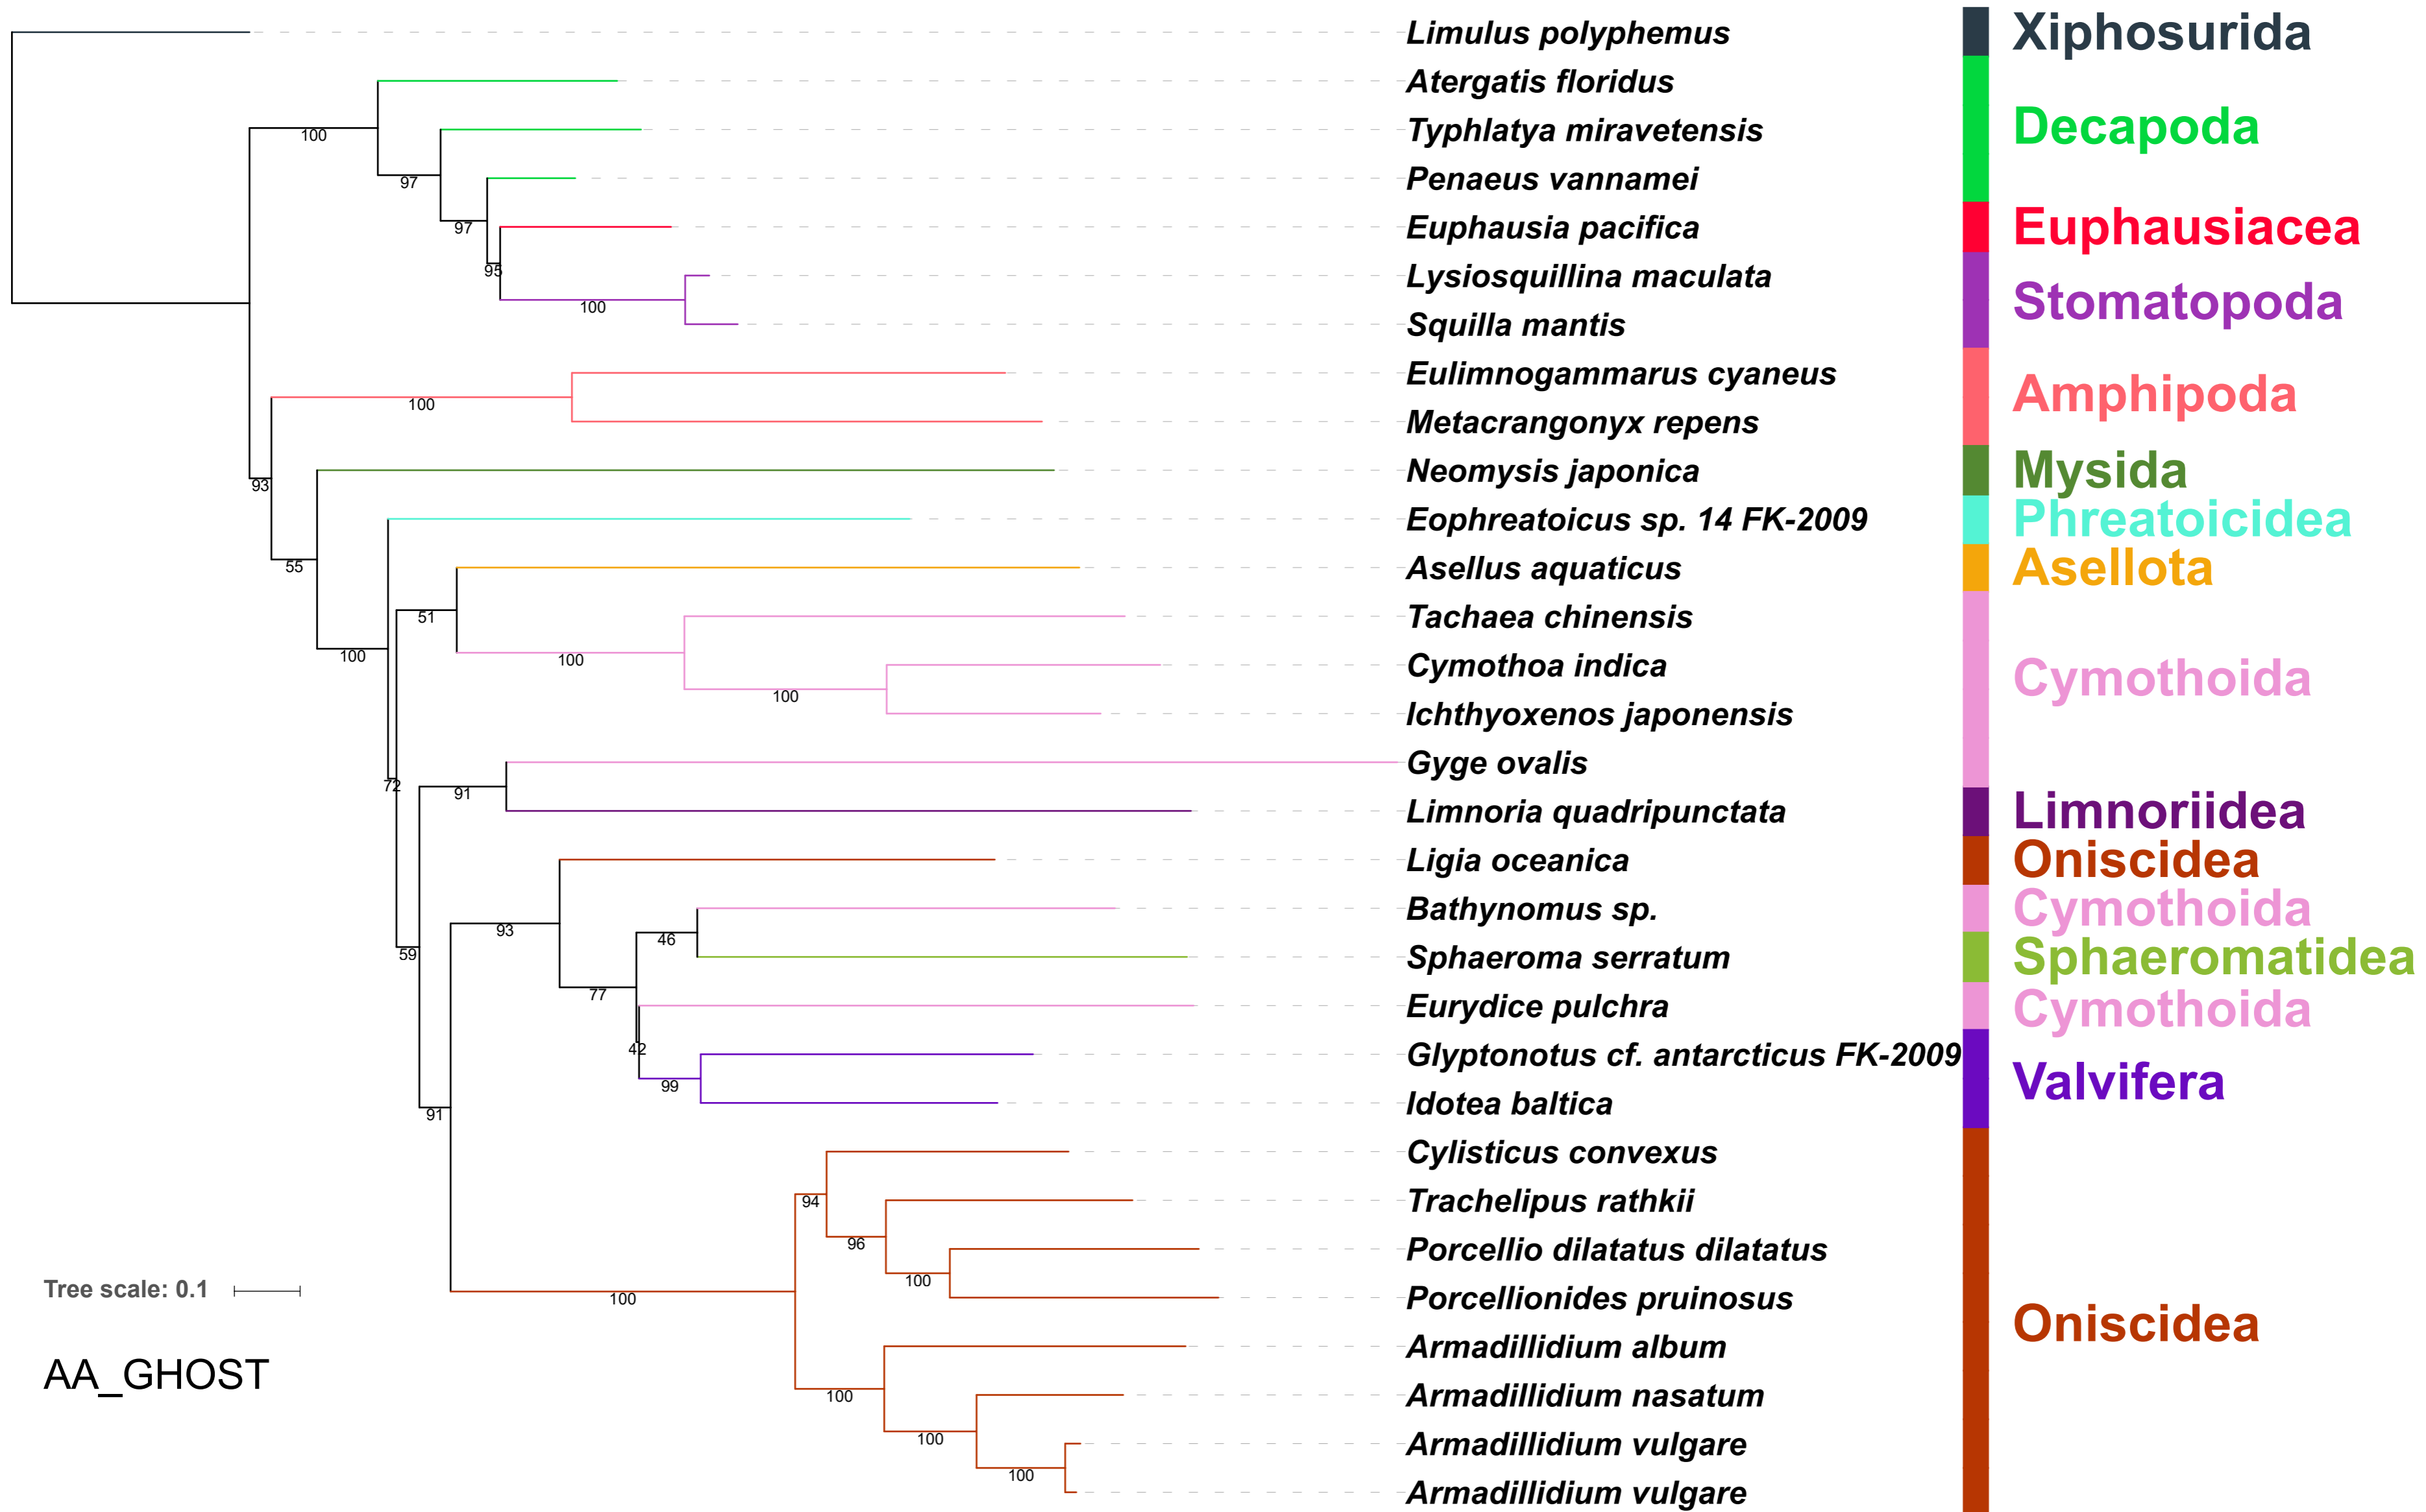

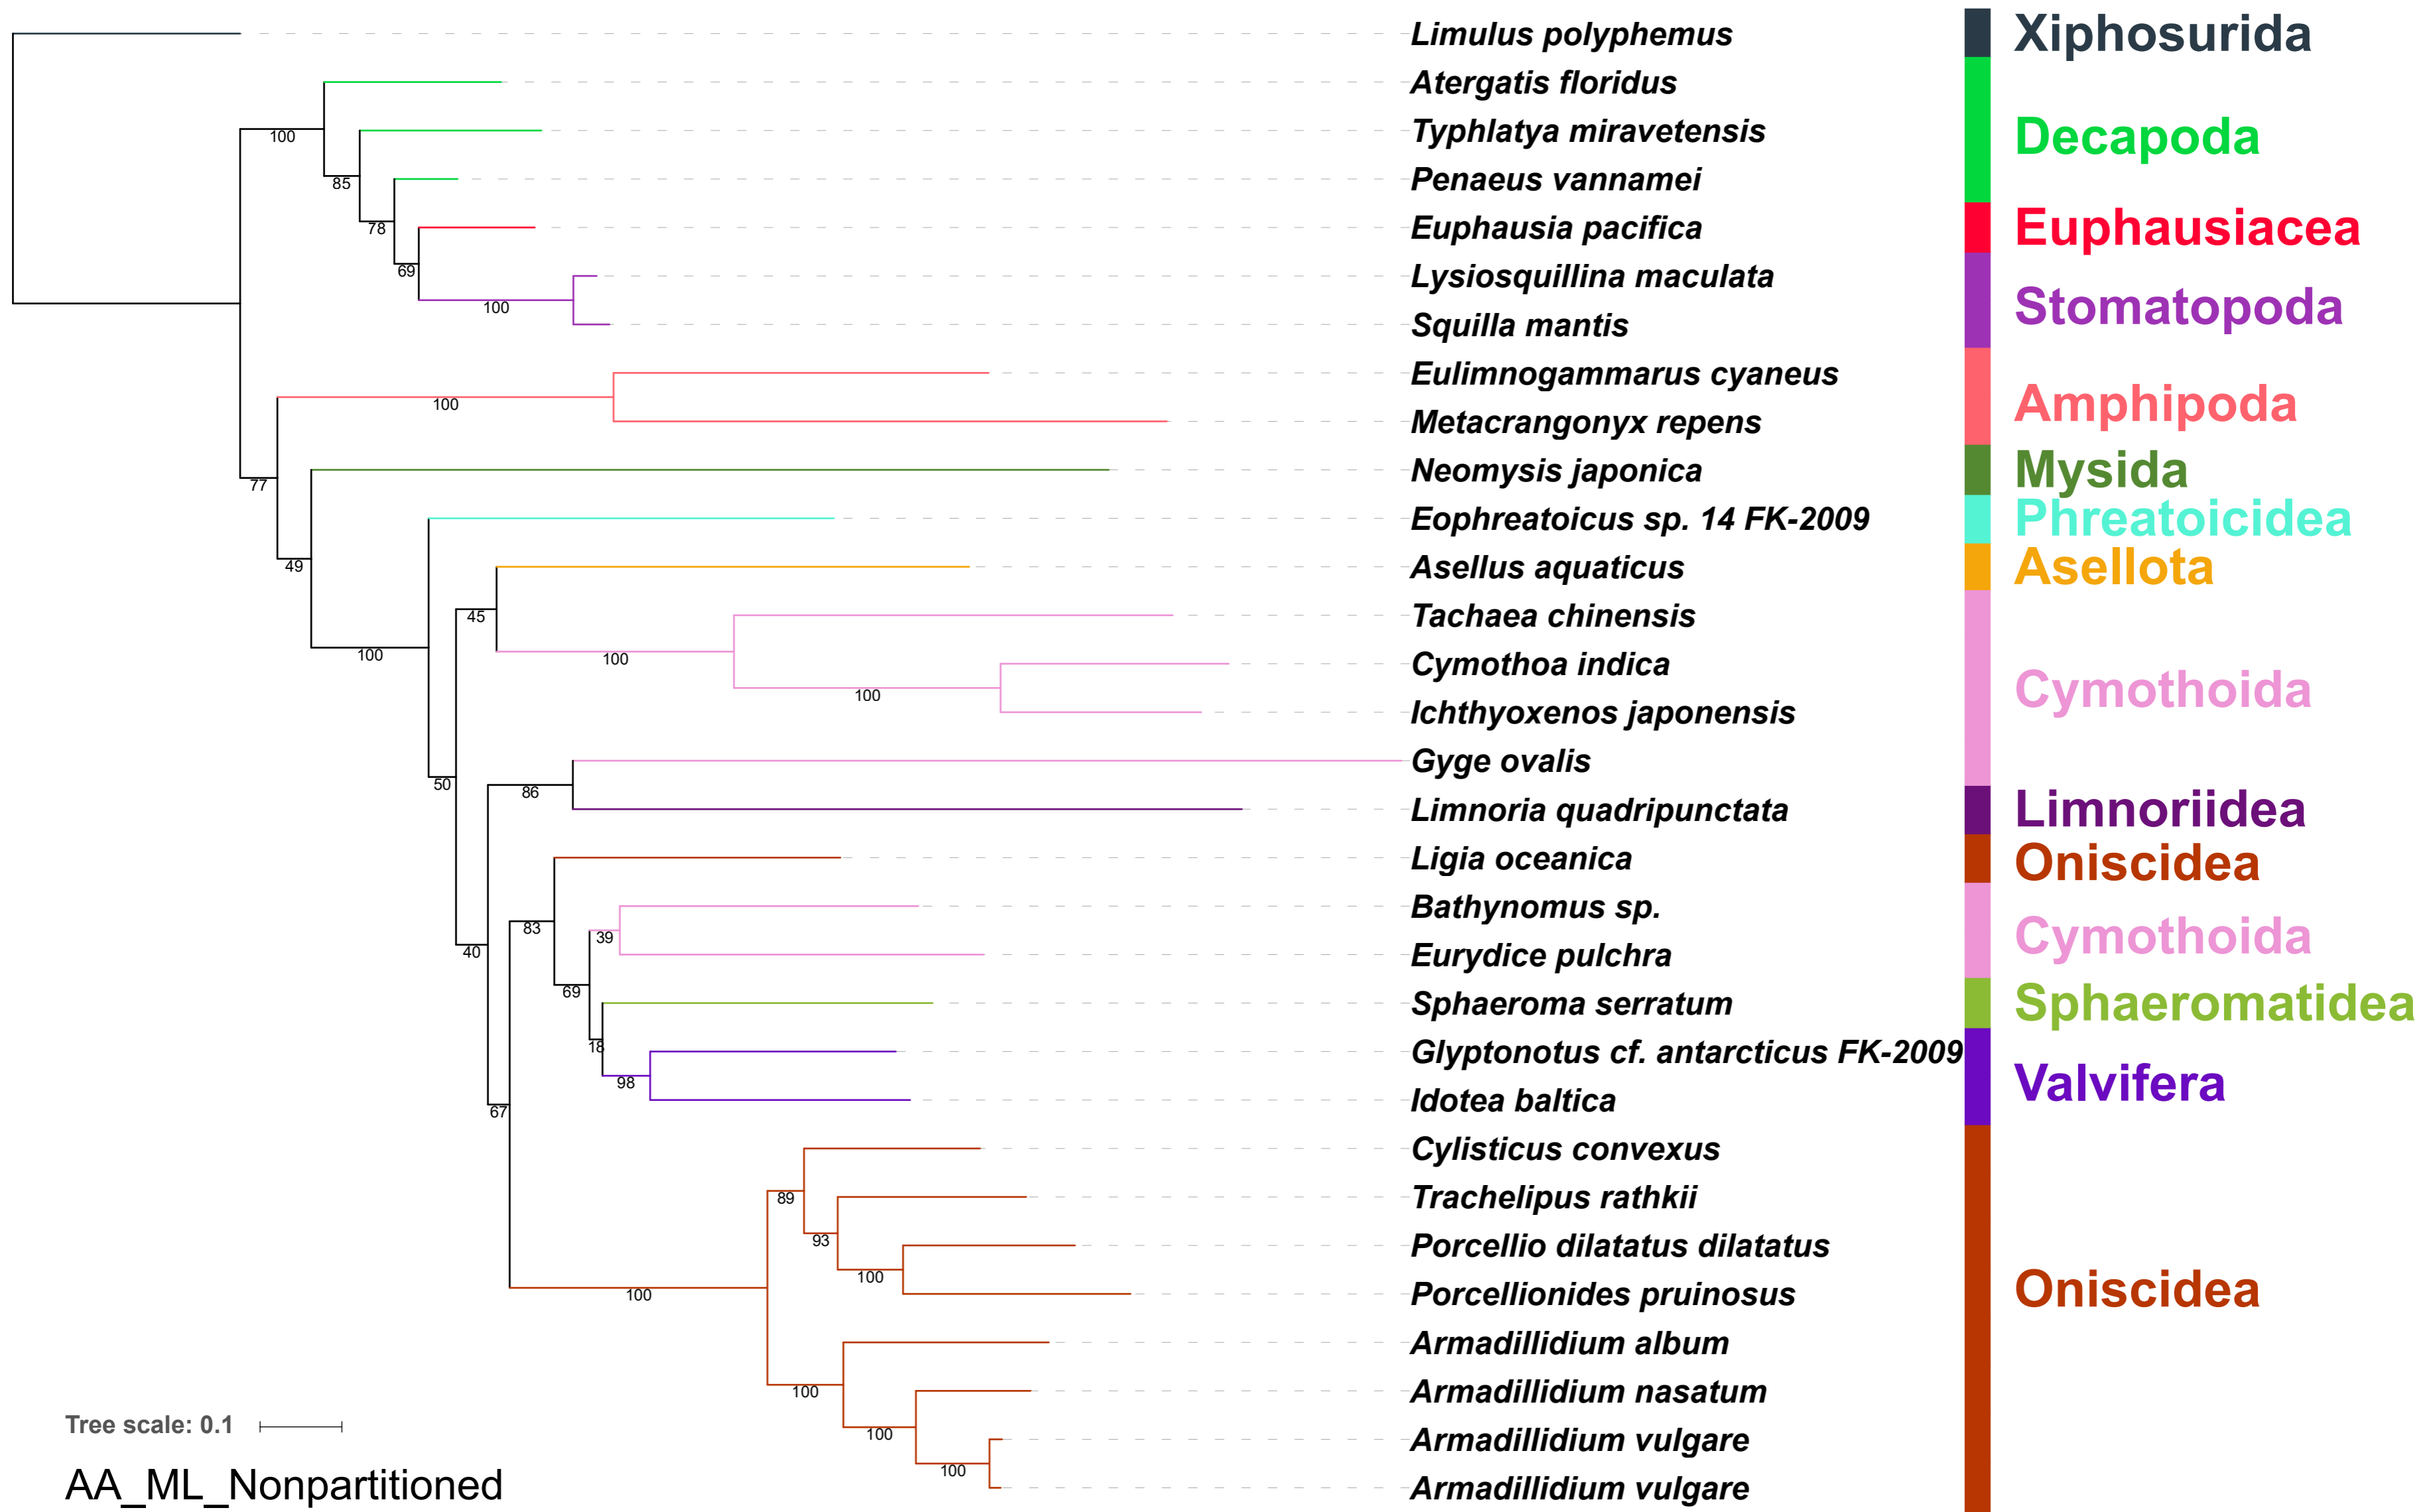

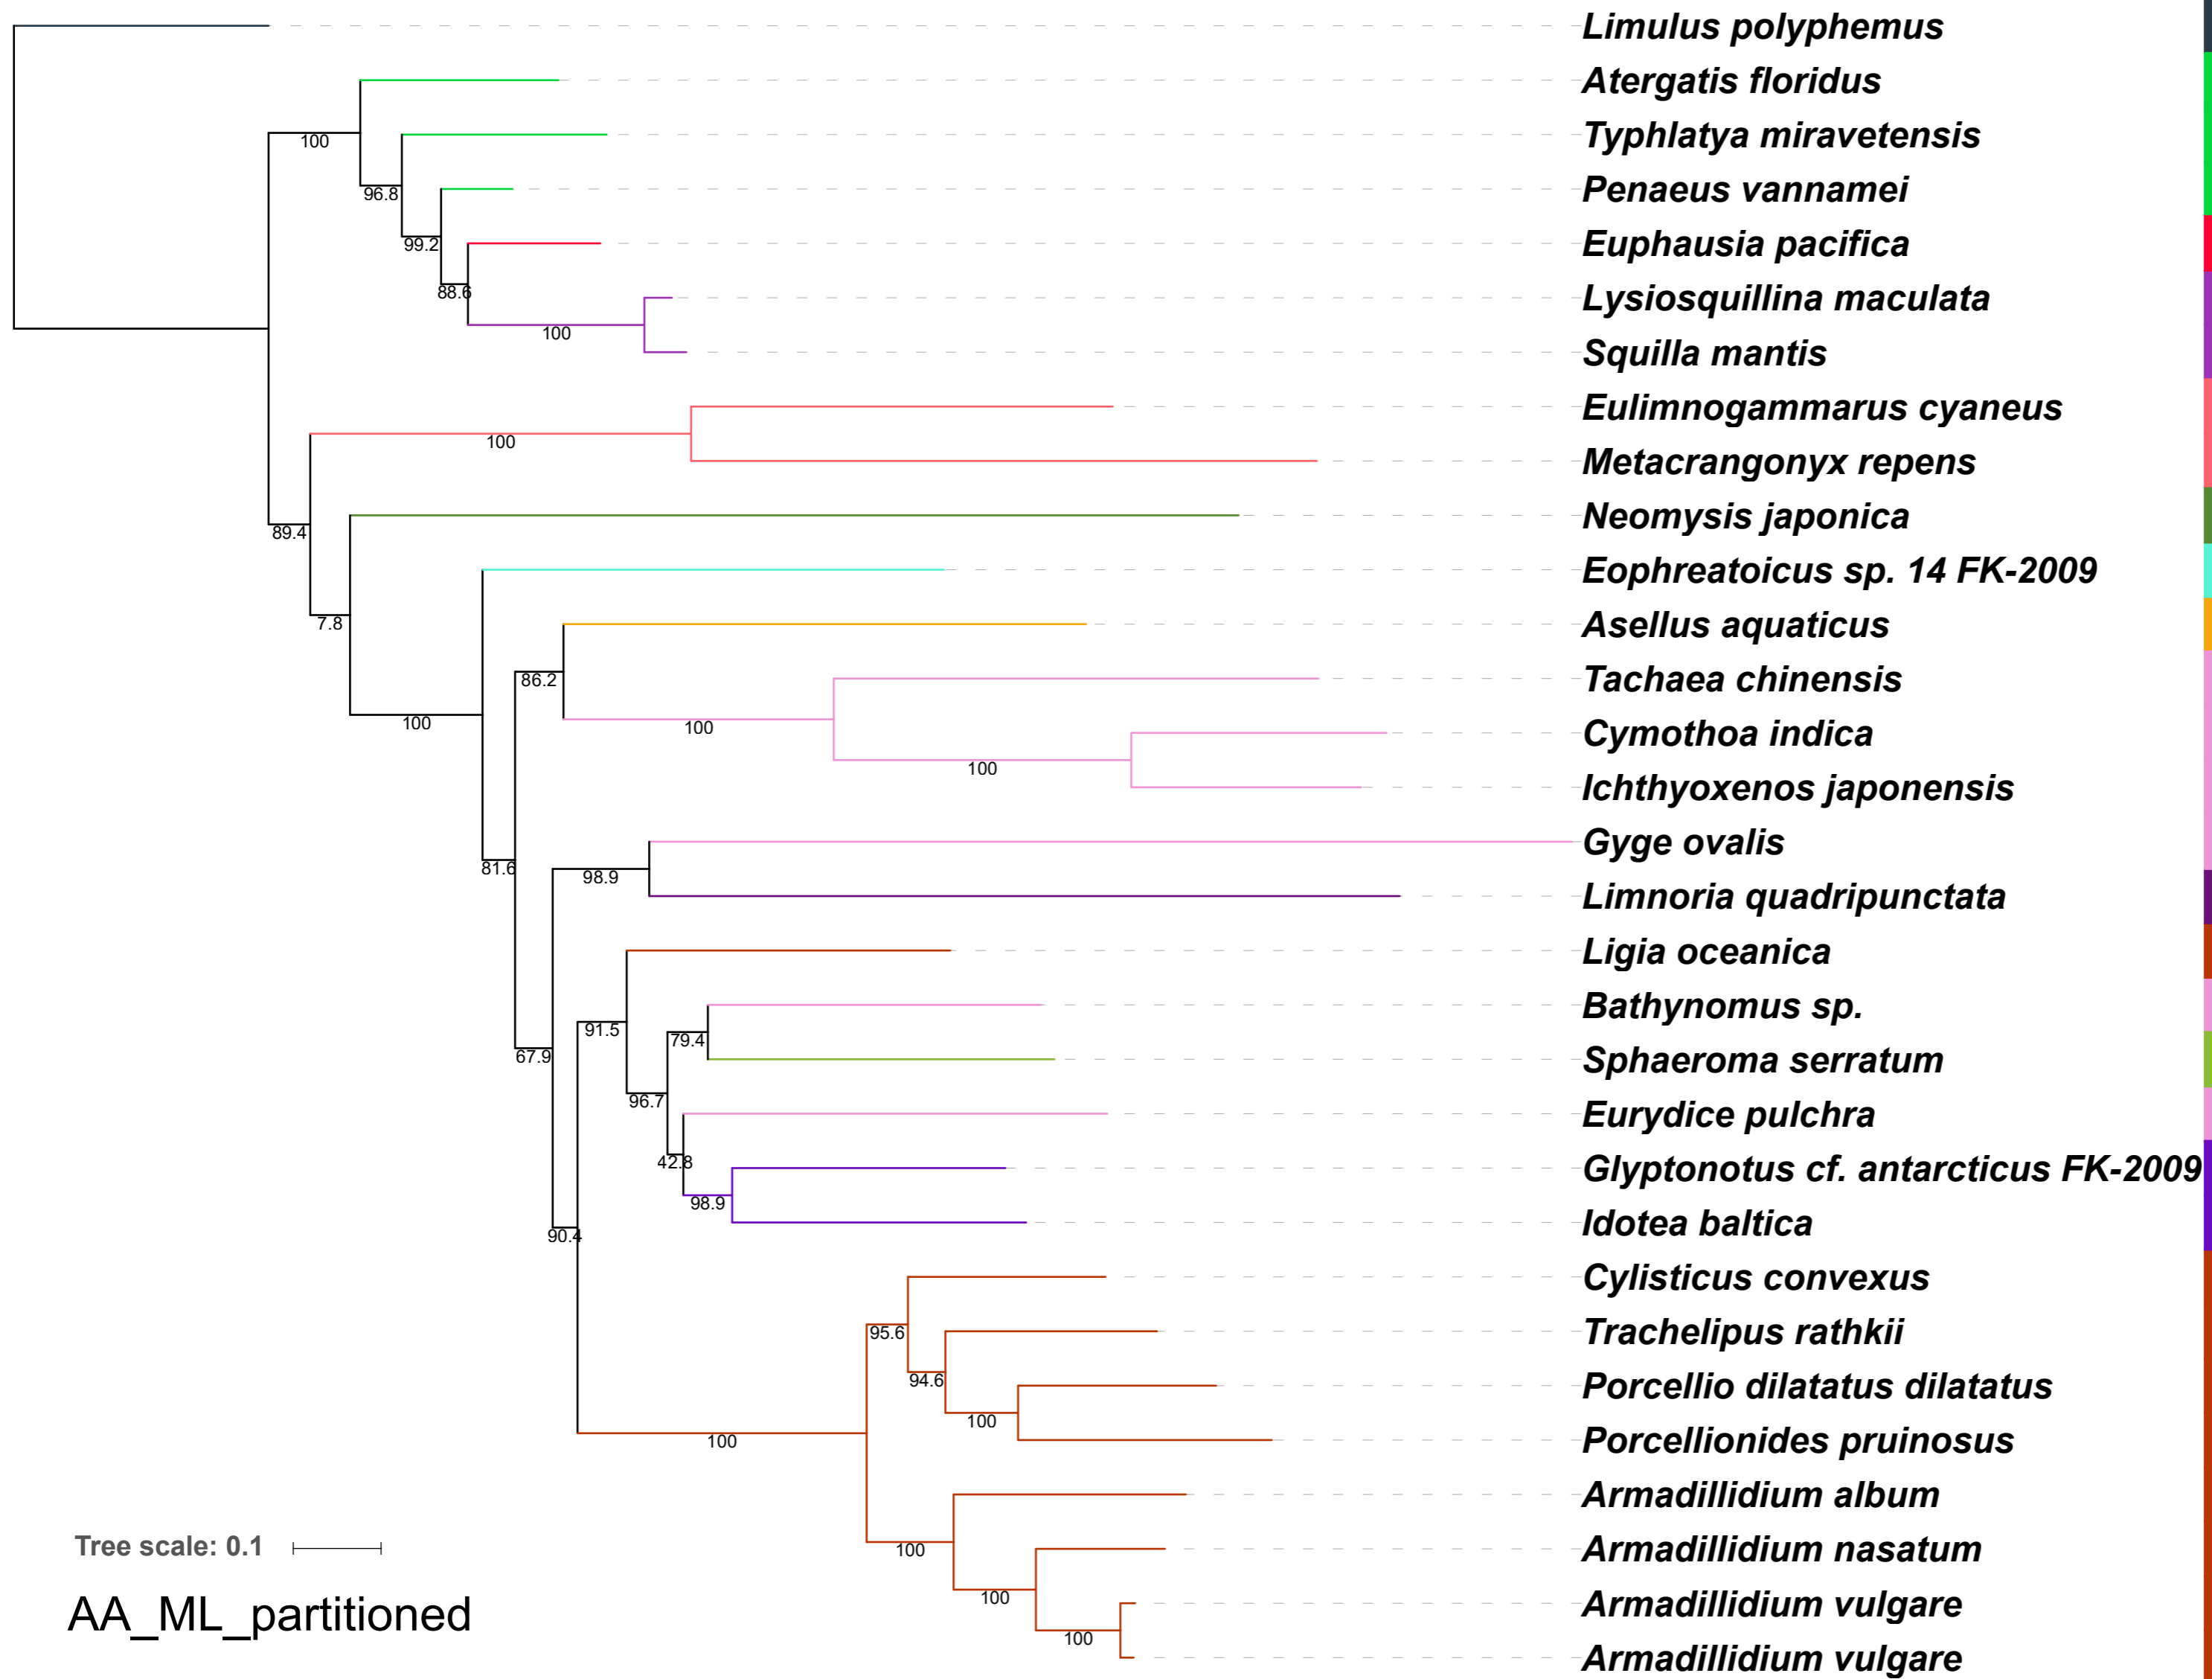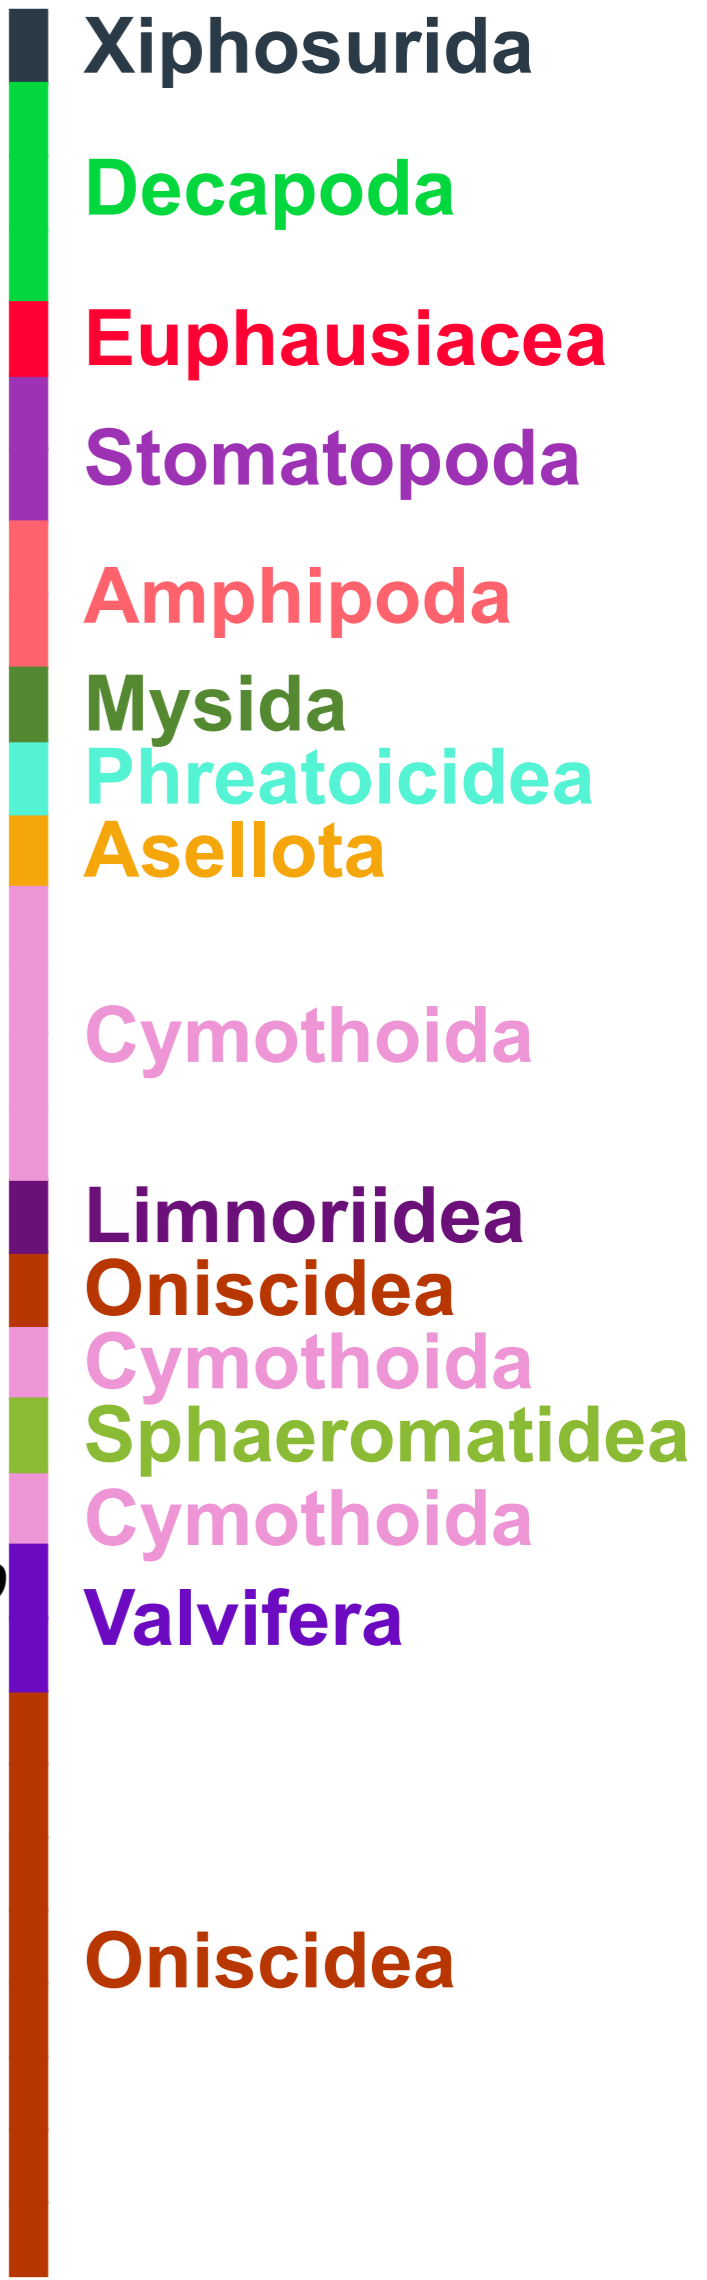

Tree scale: 0.1

AA\_ML\_partitioned

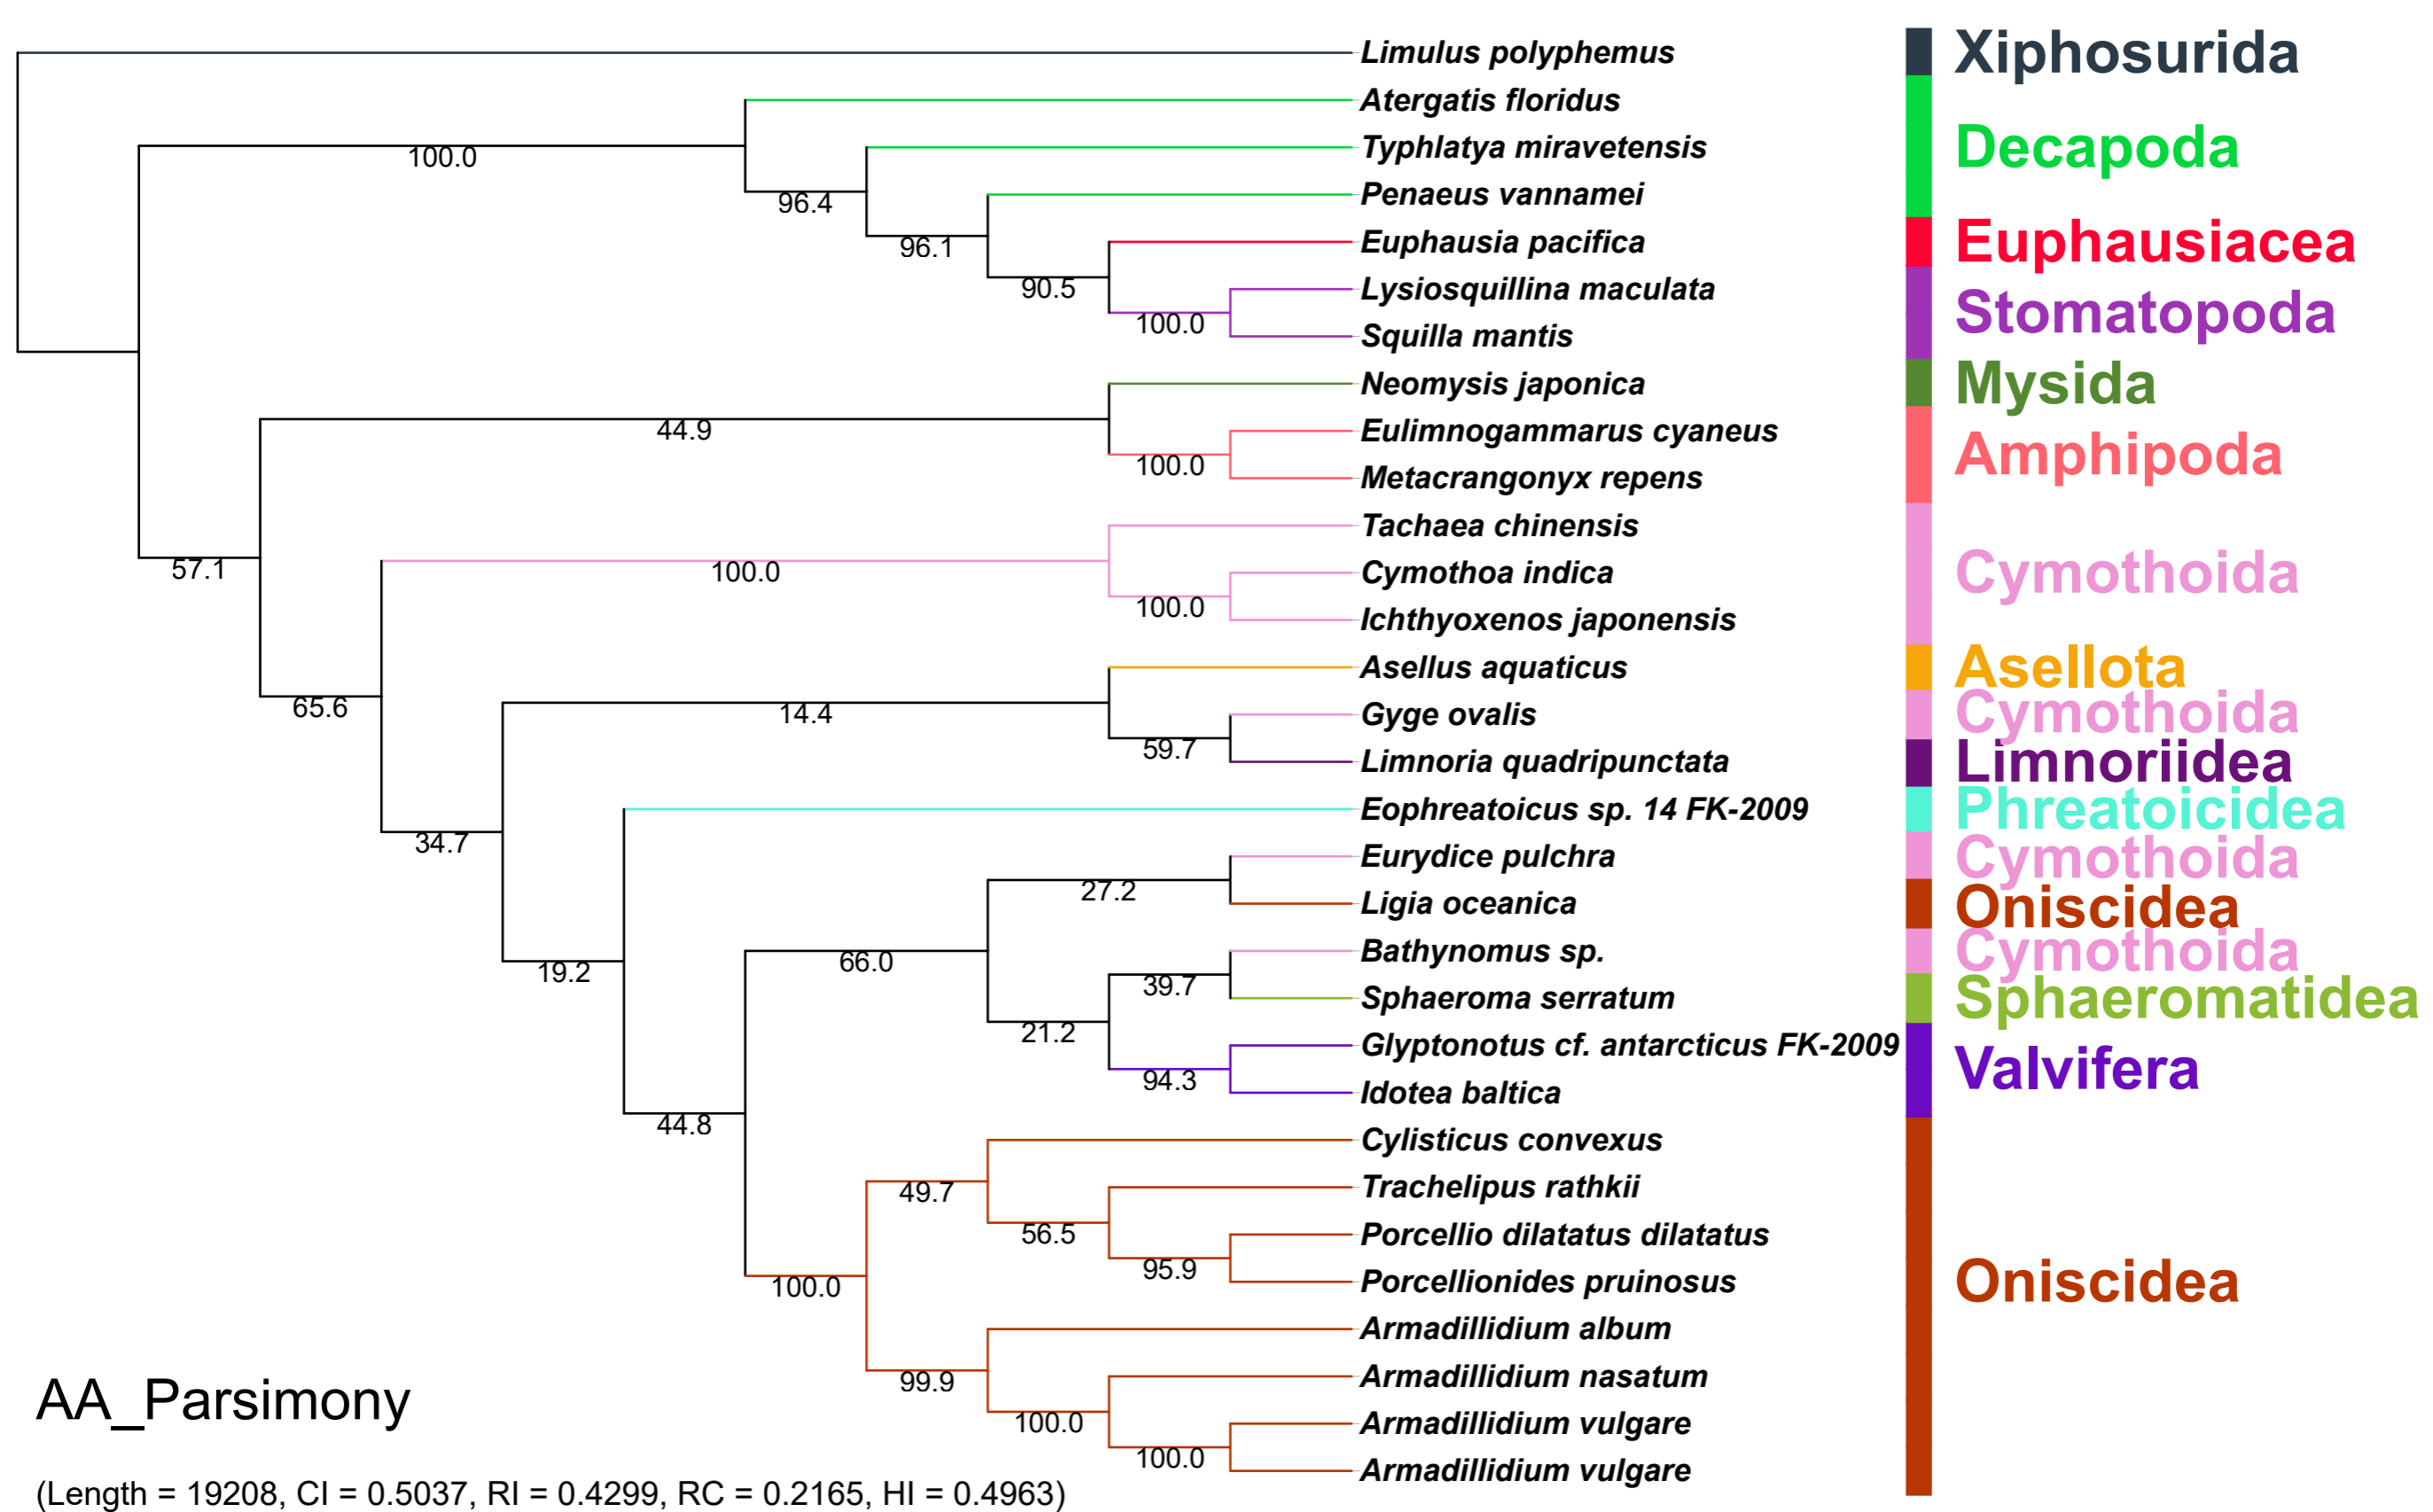

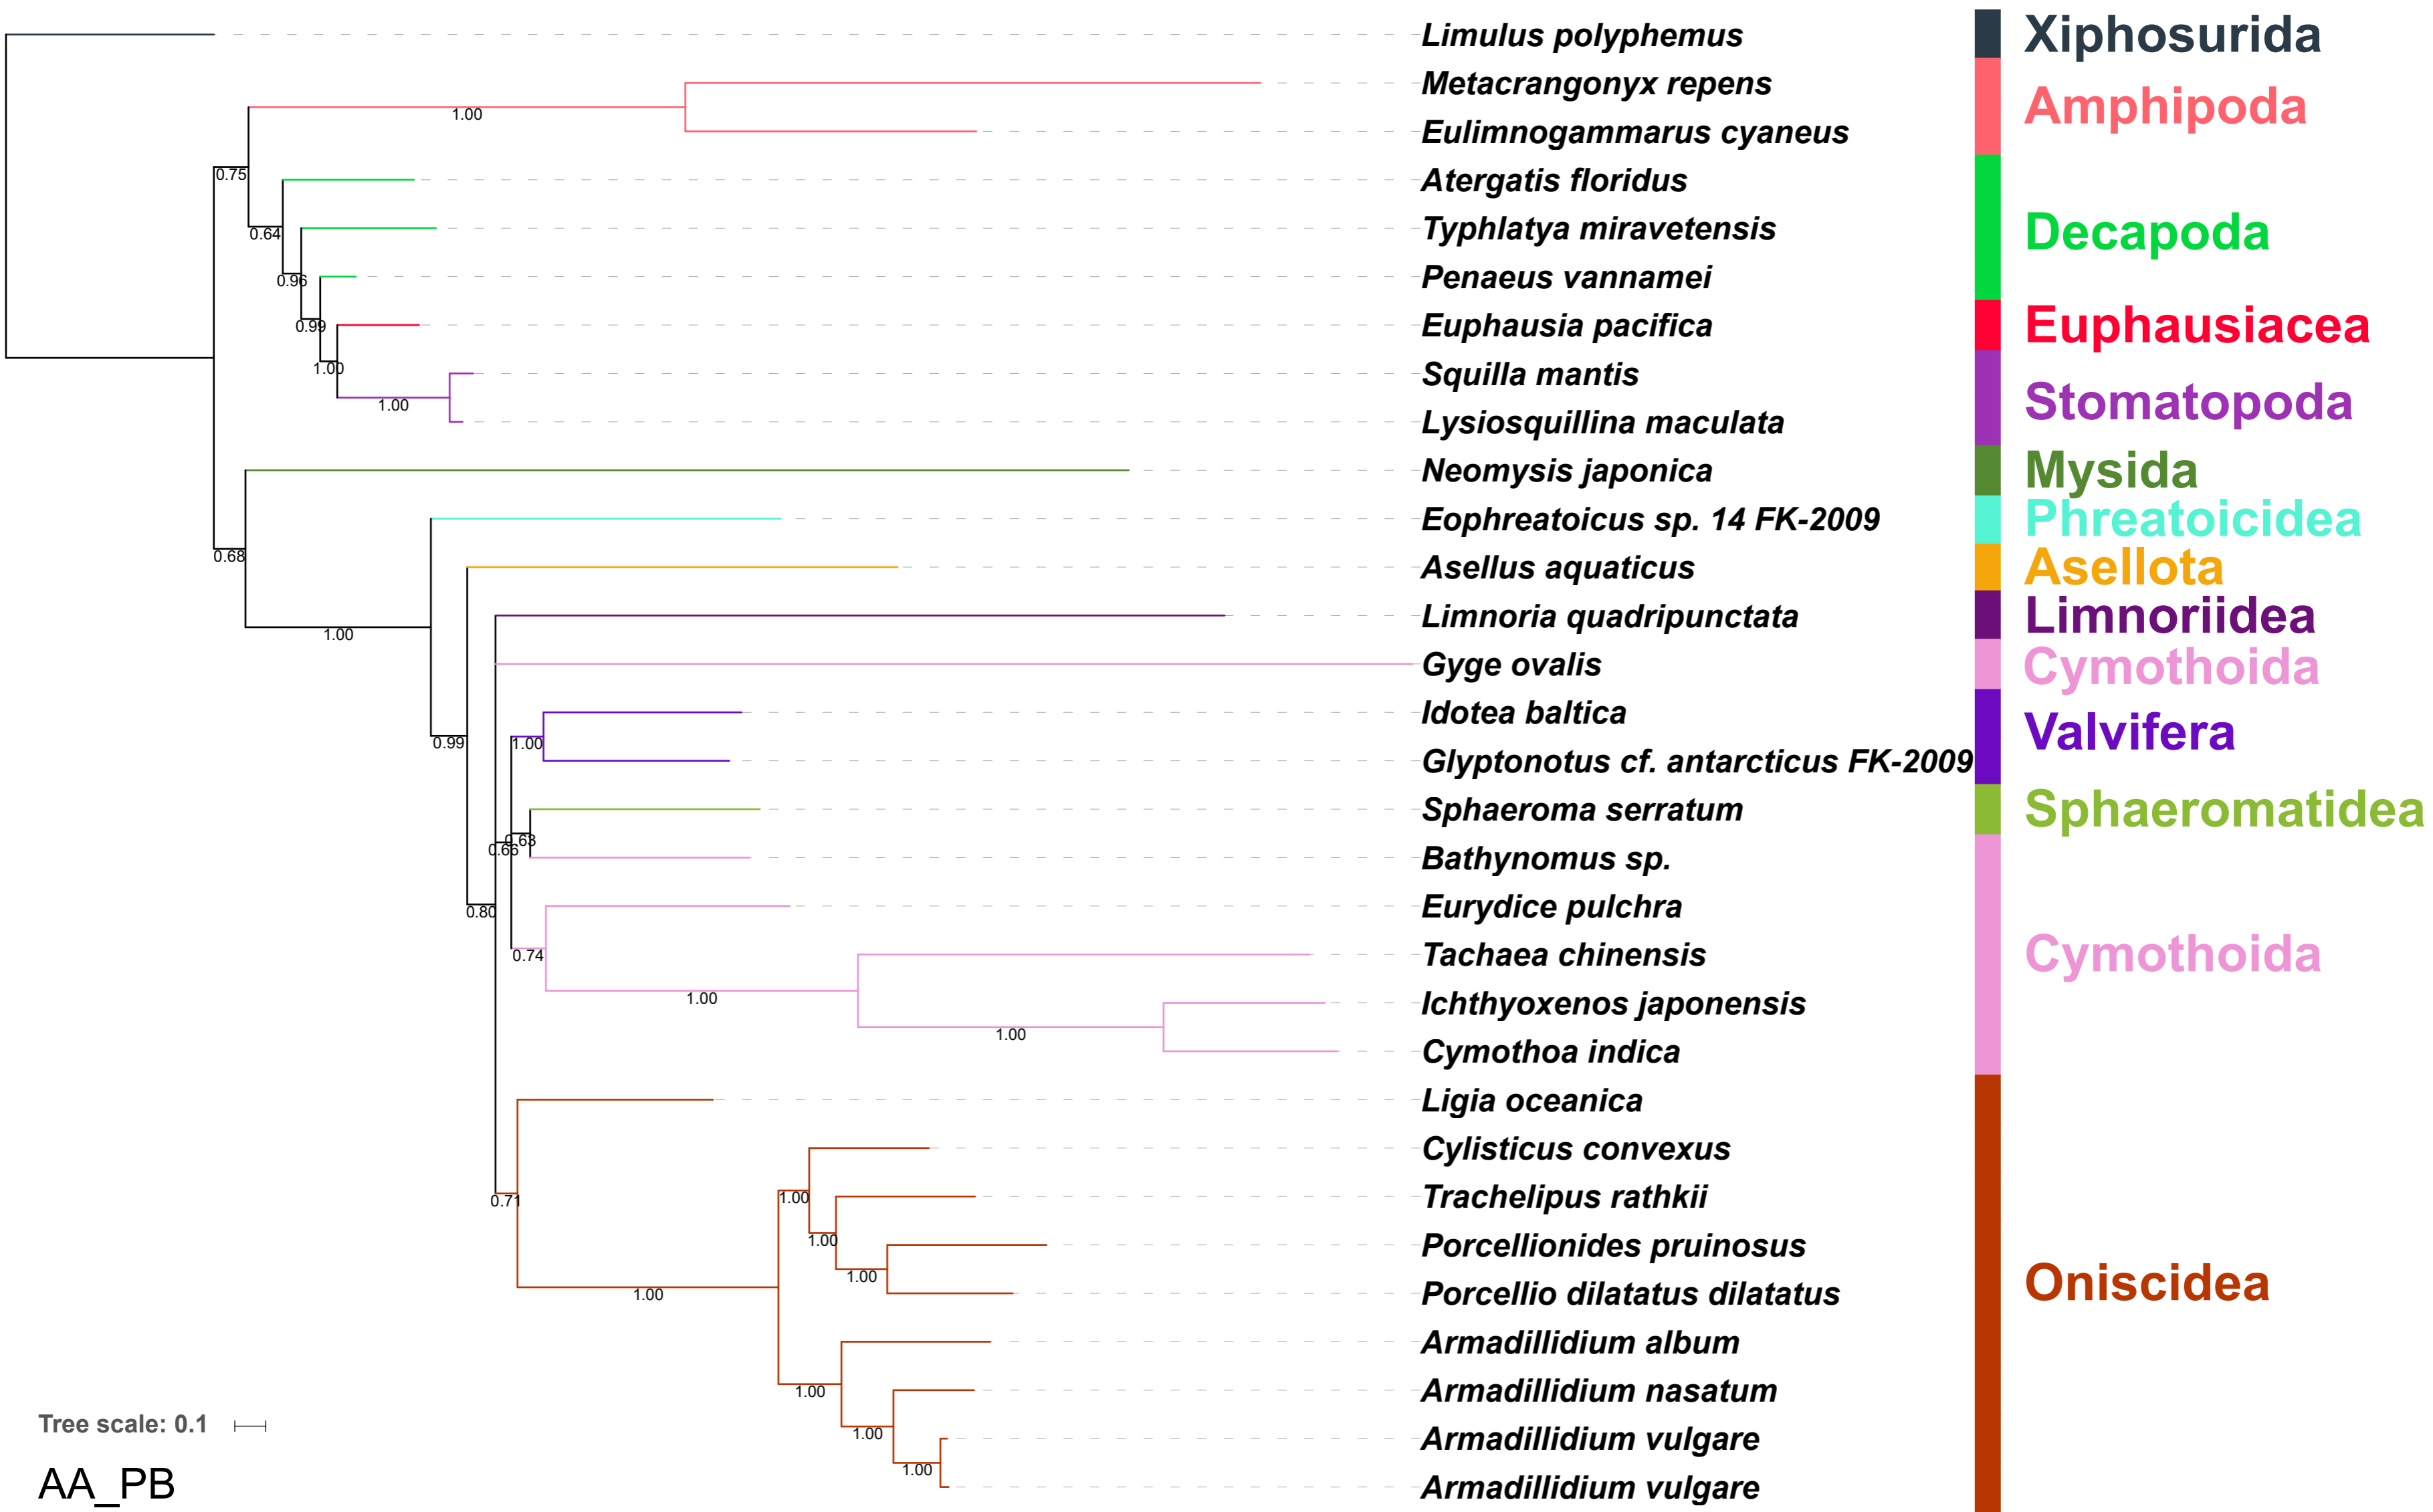

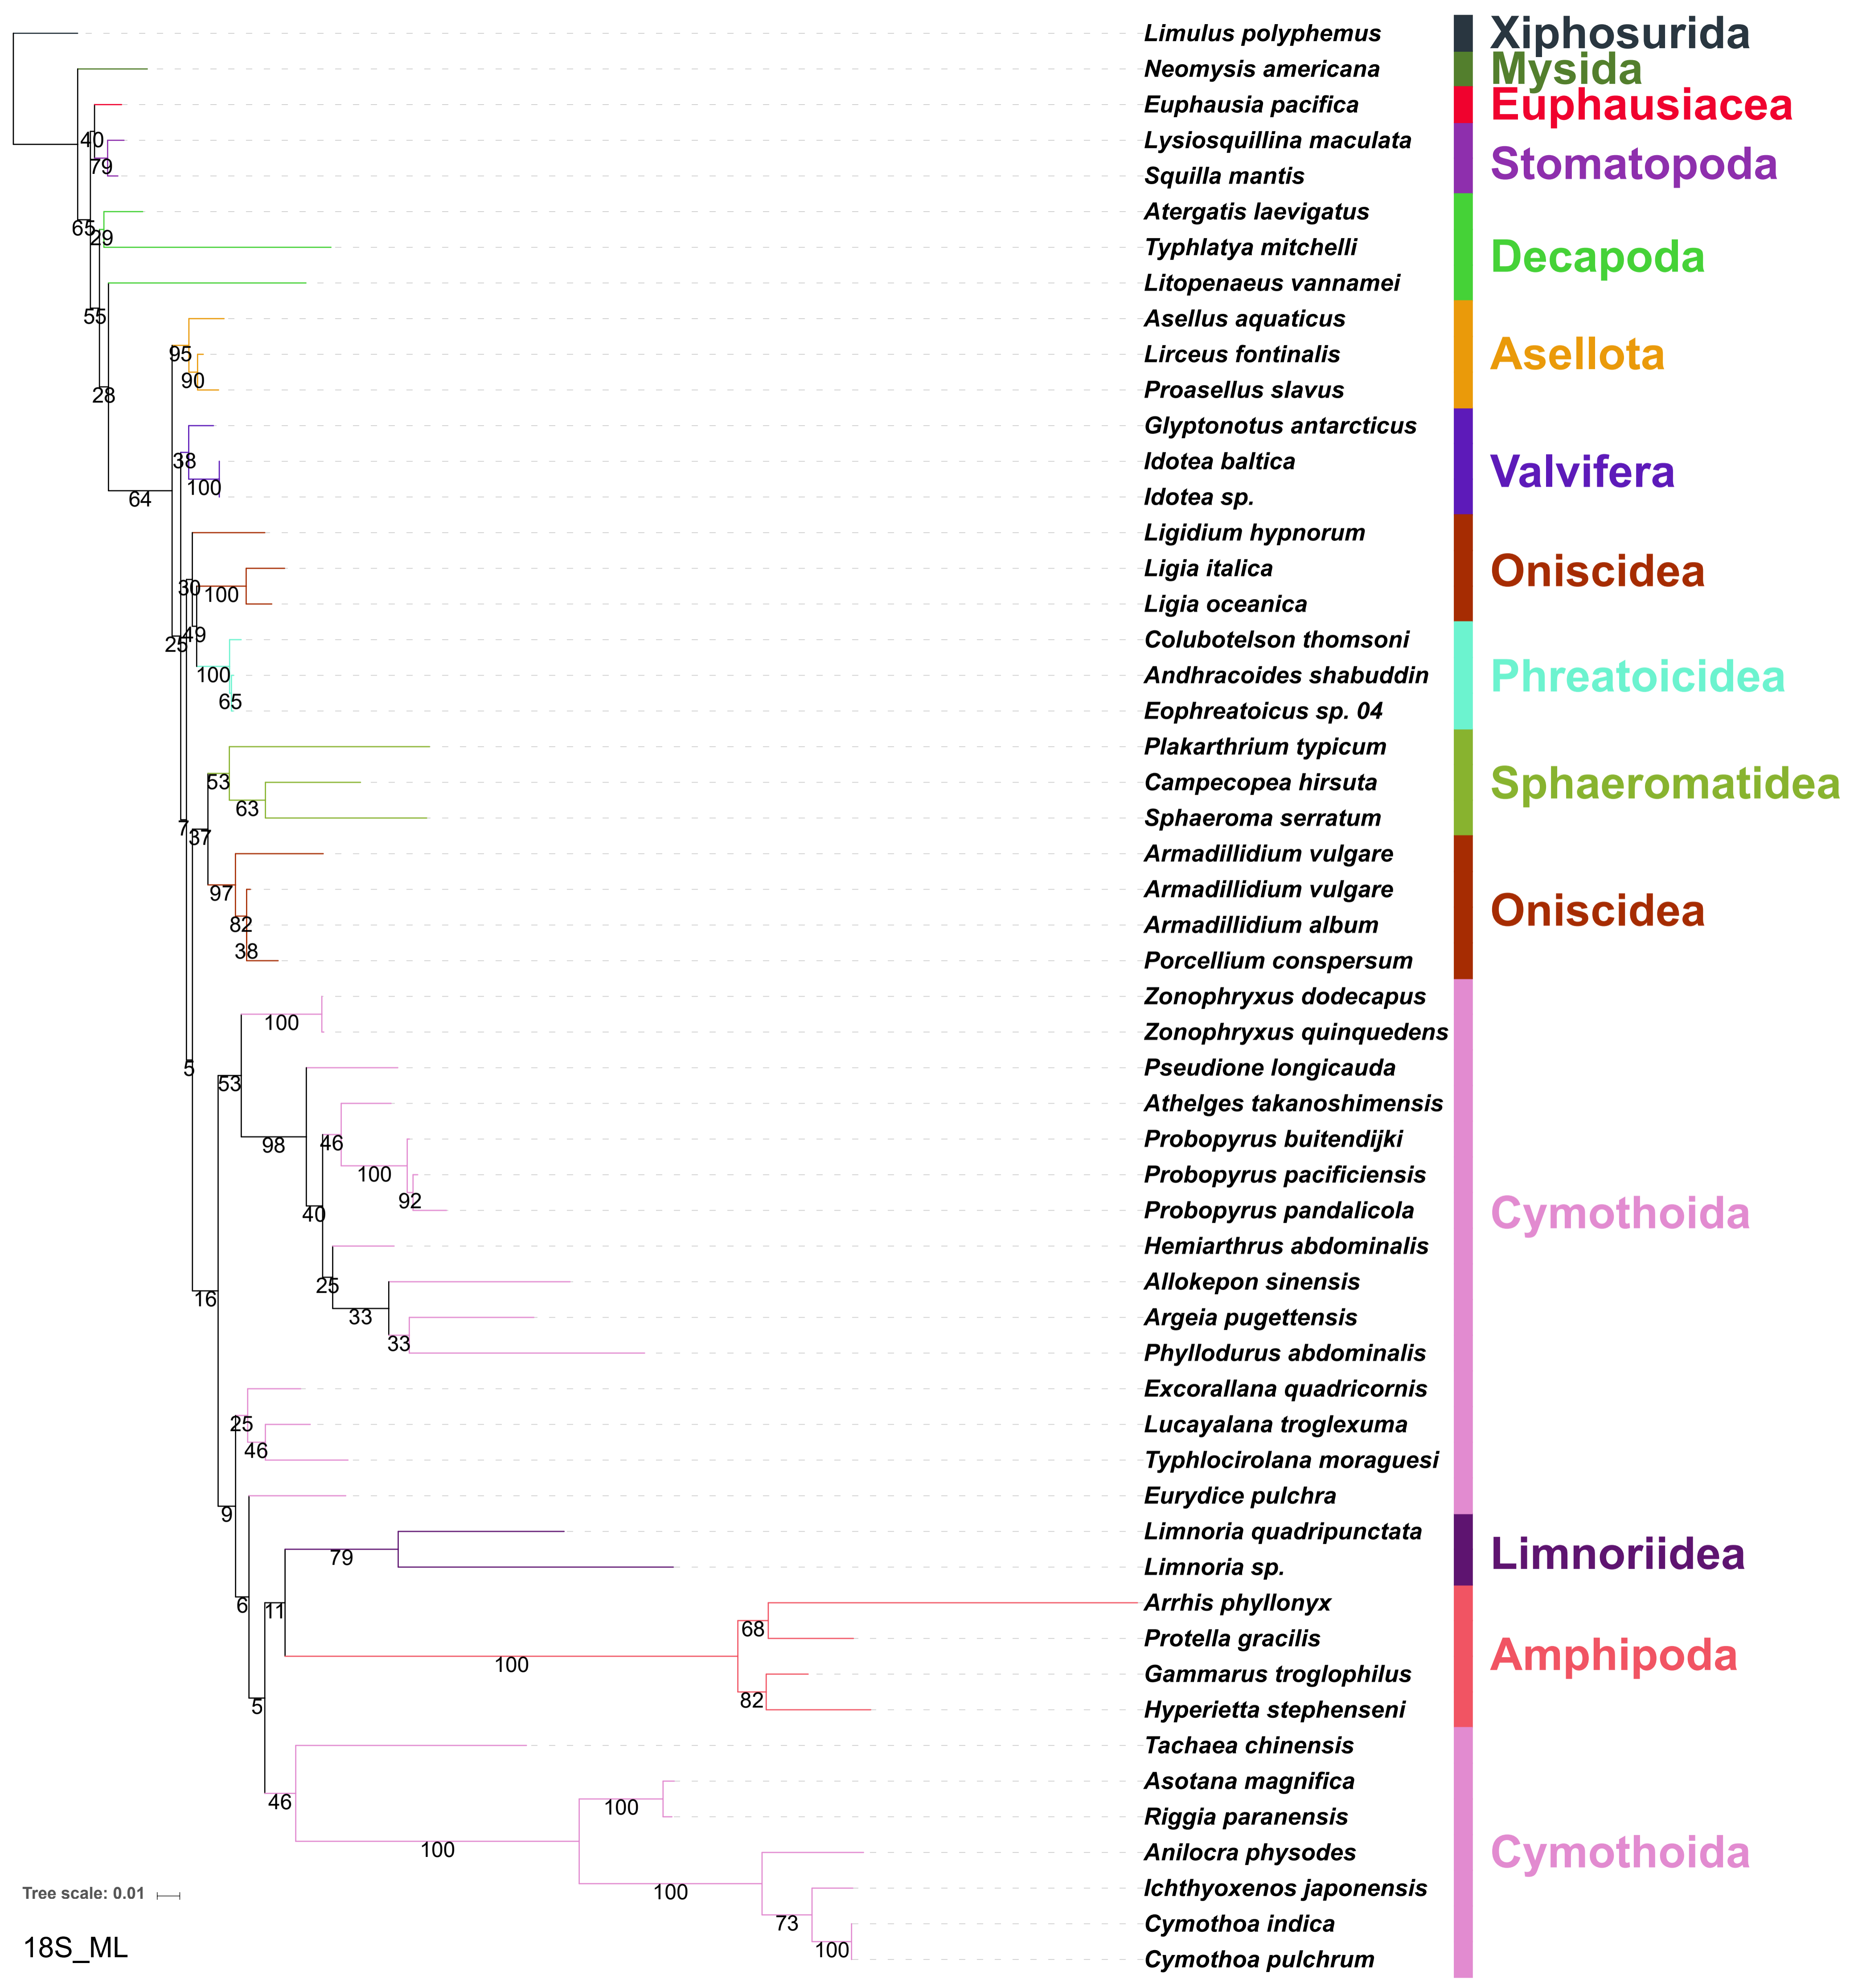

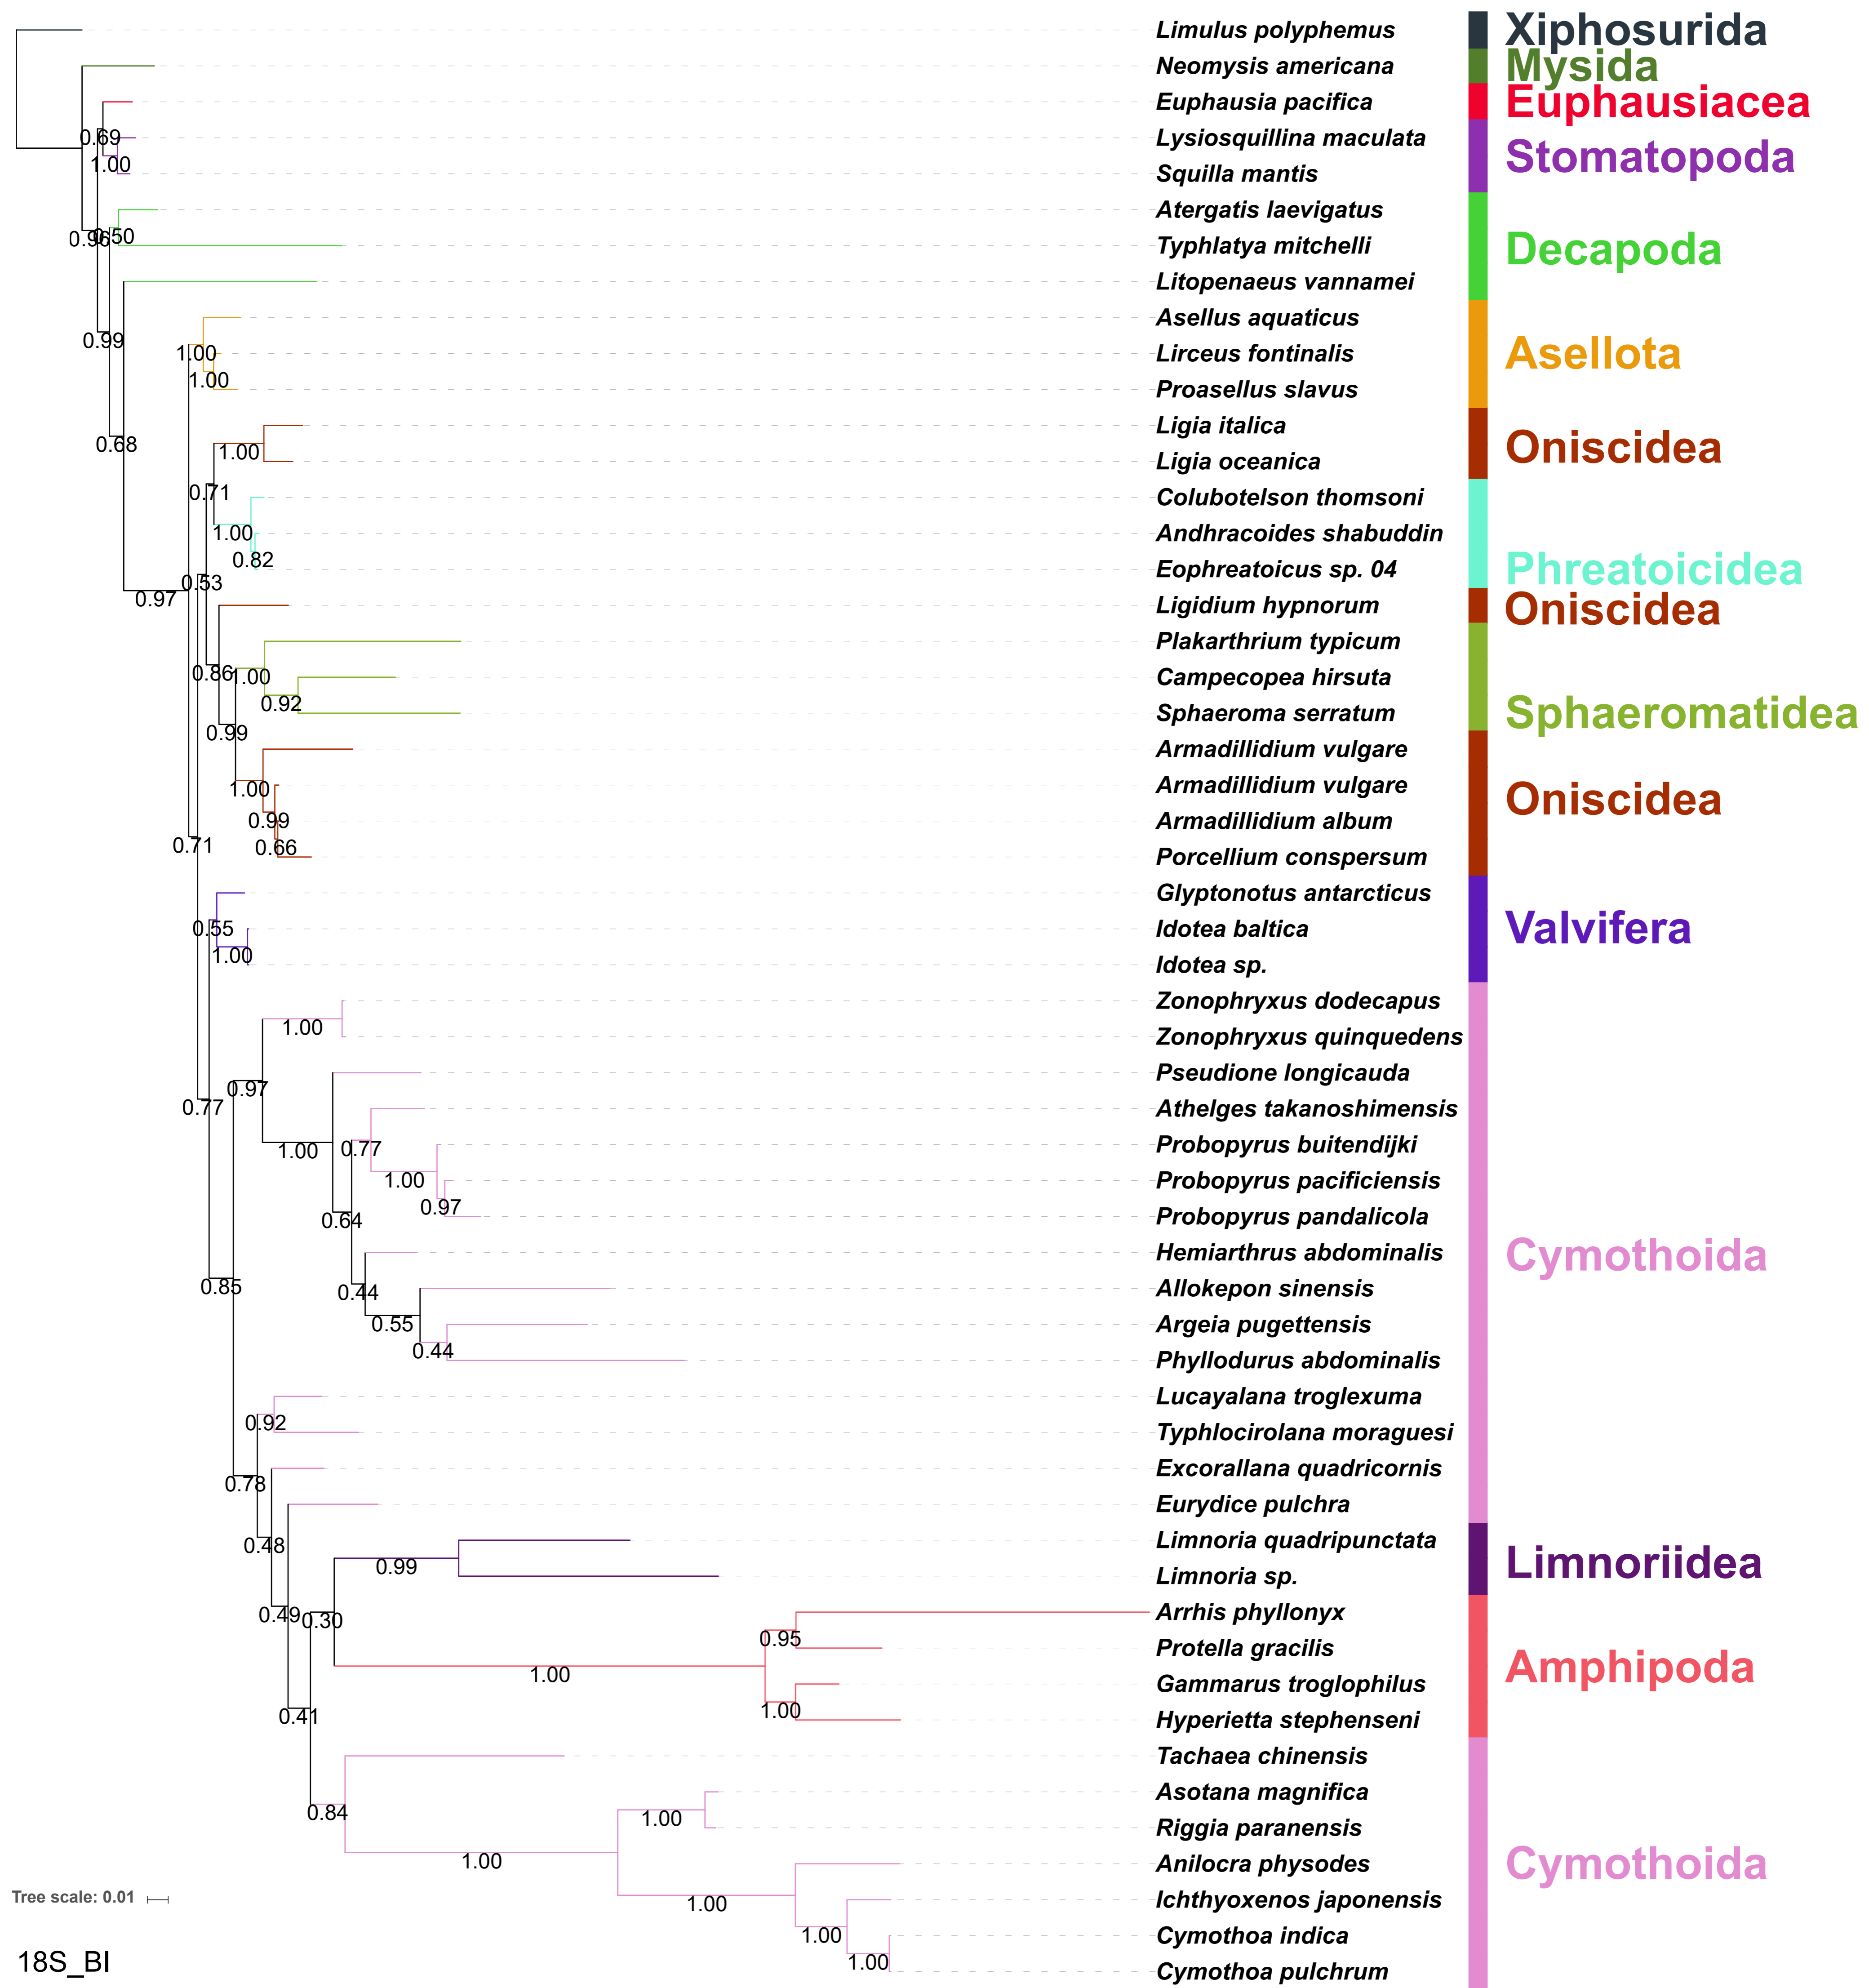



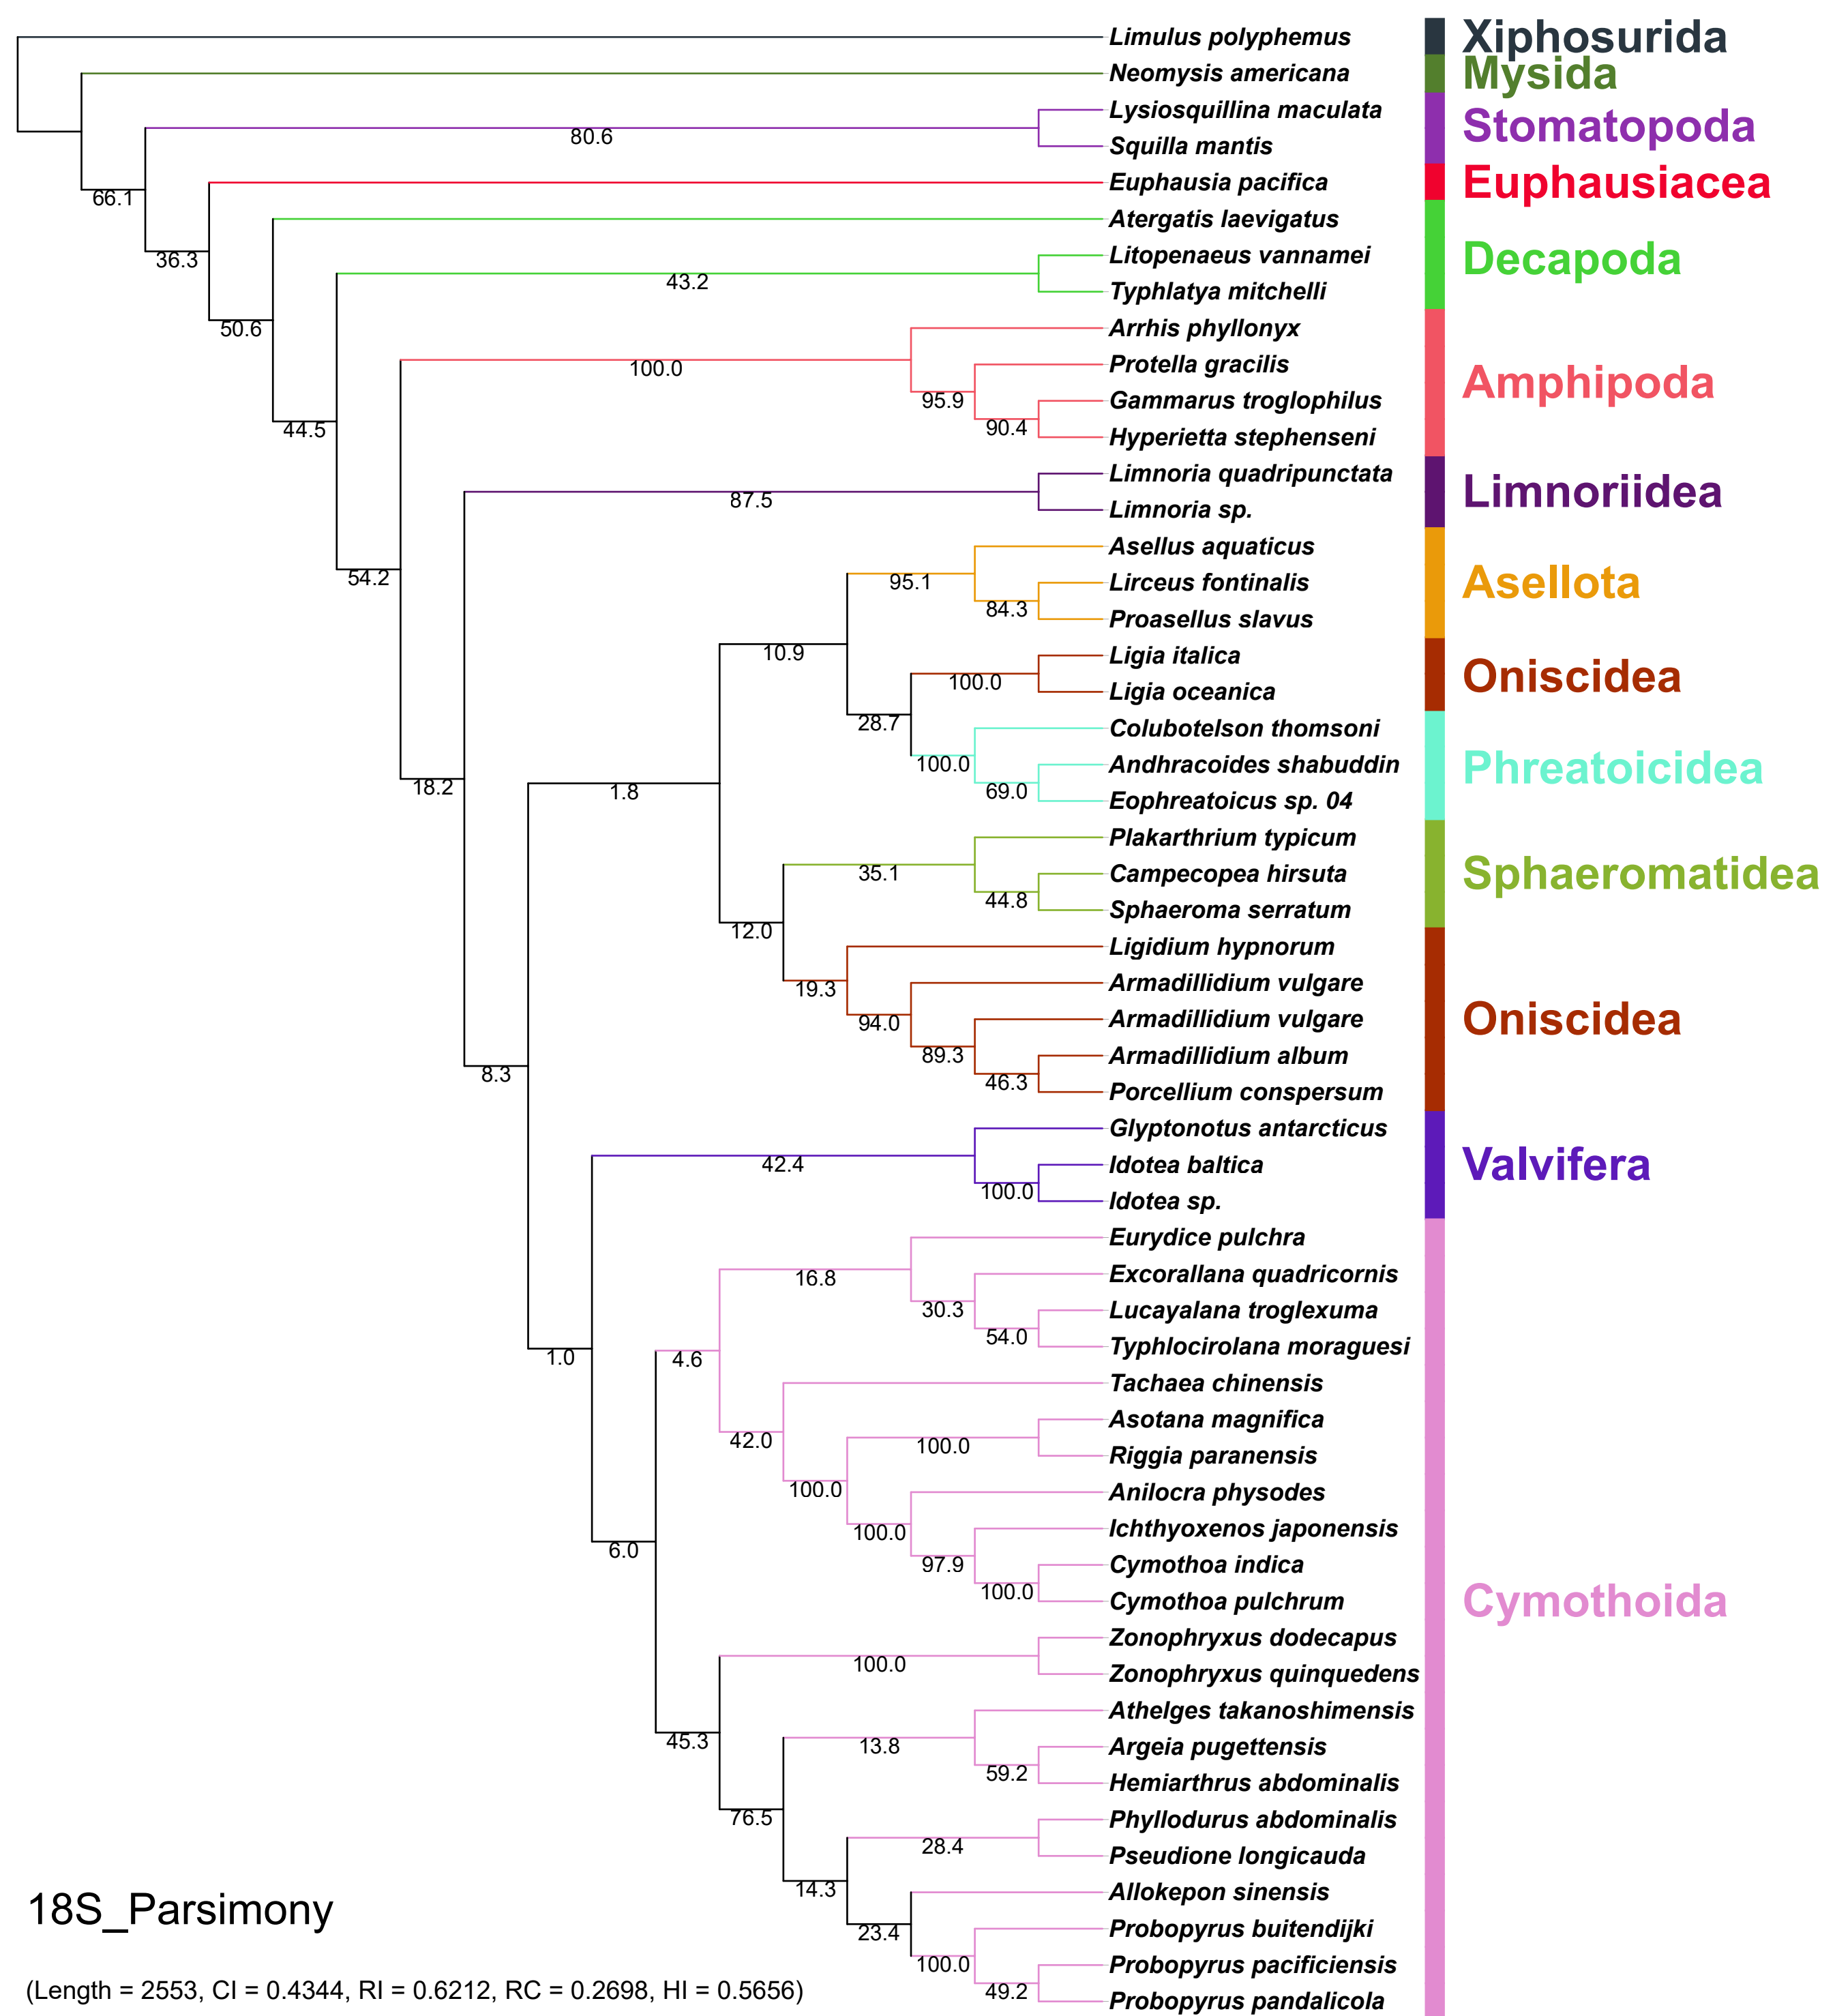

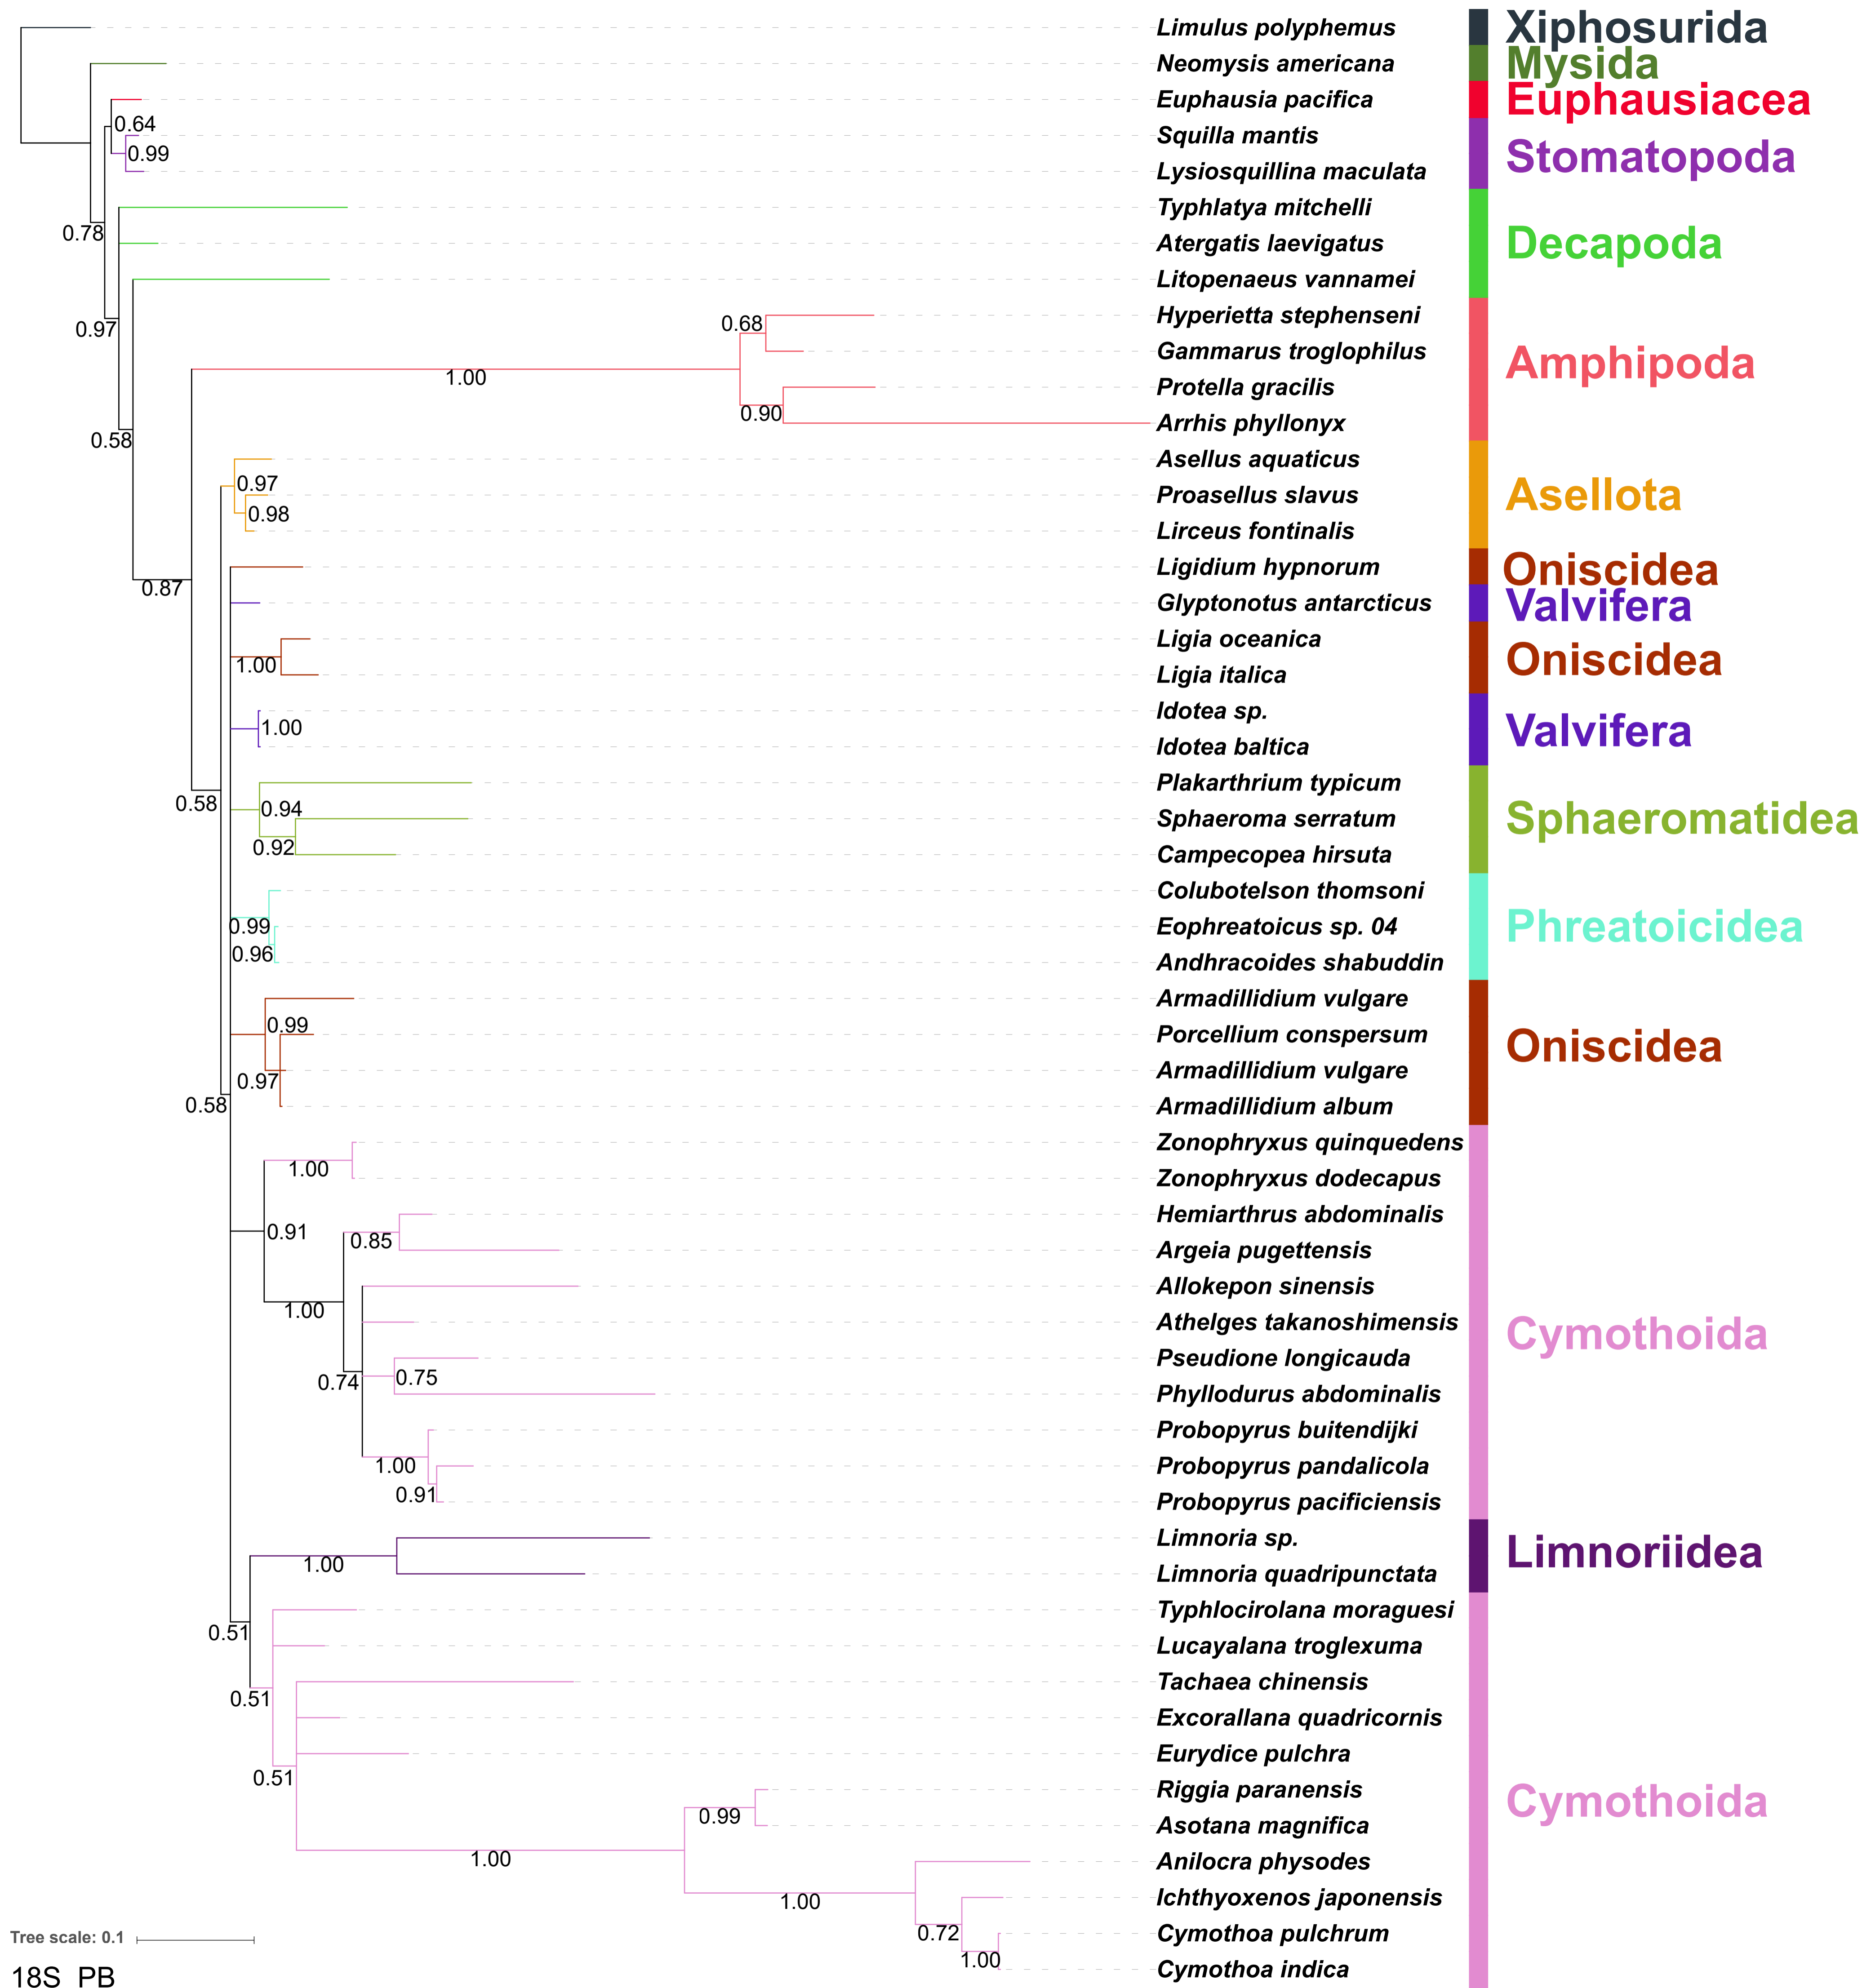

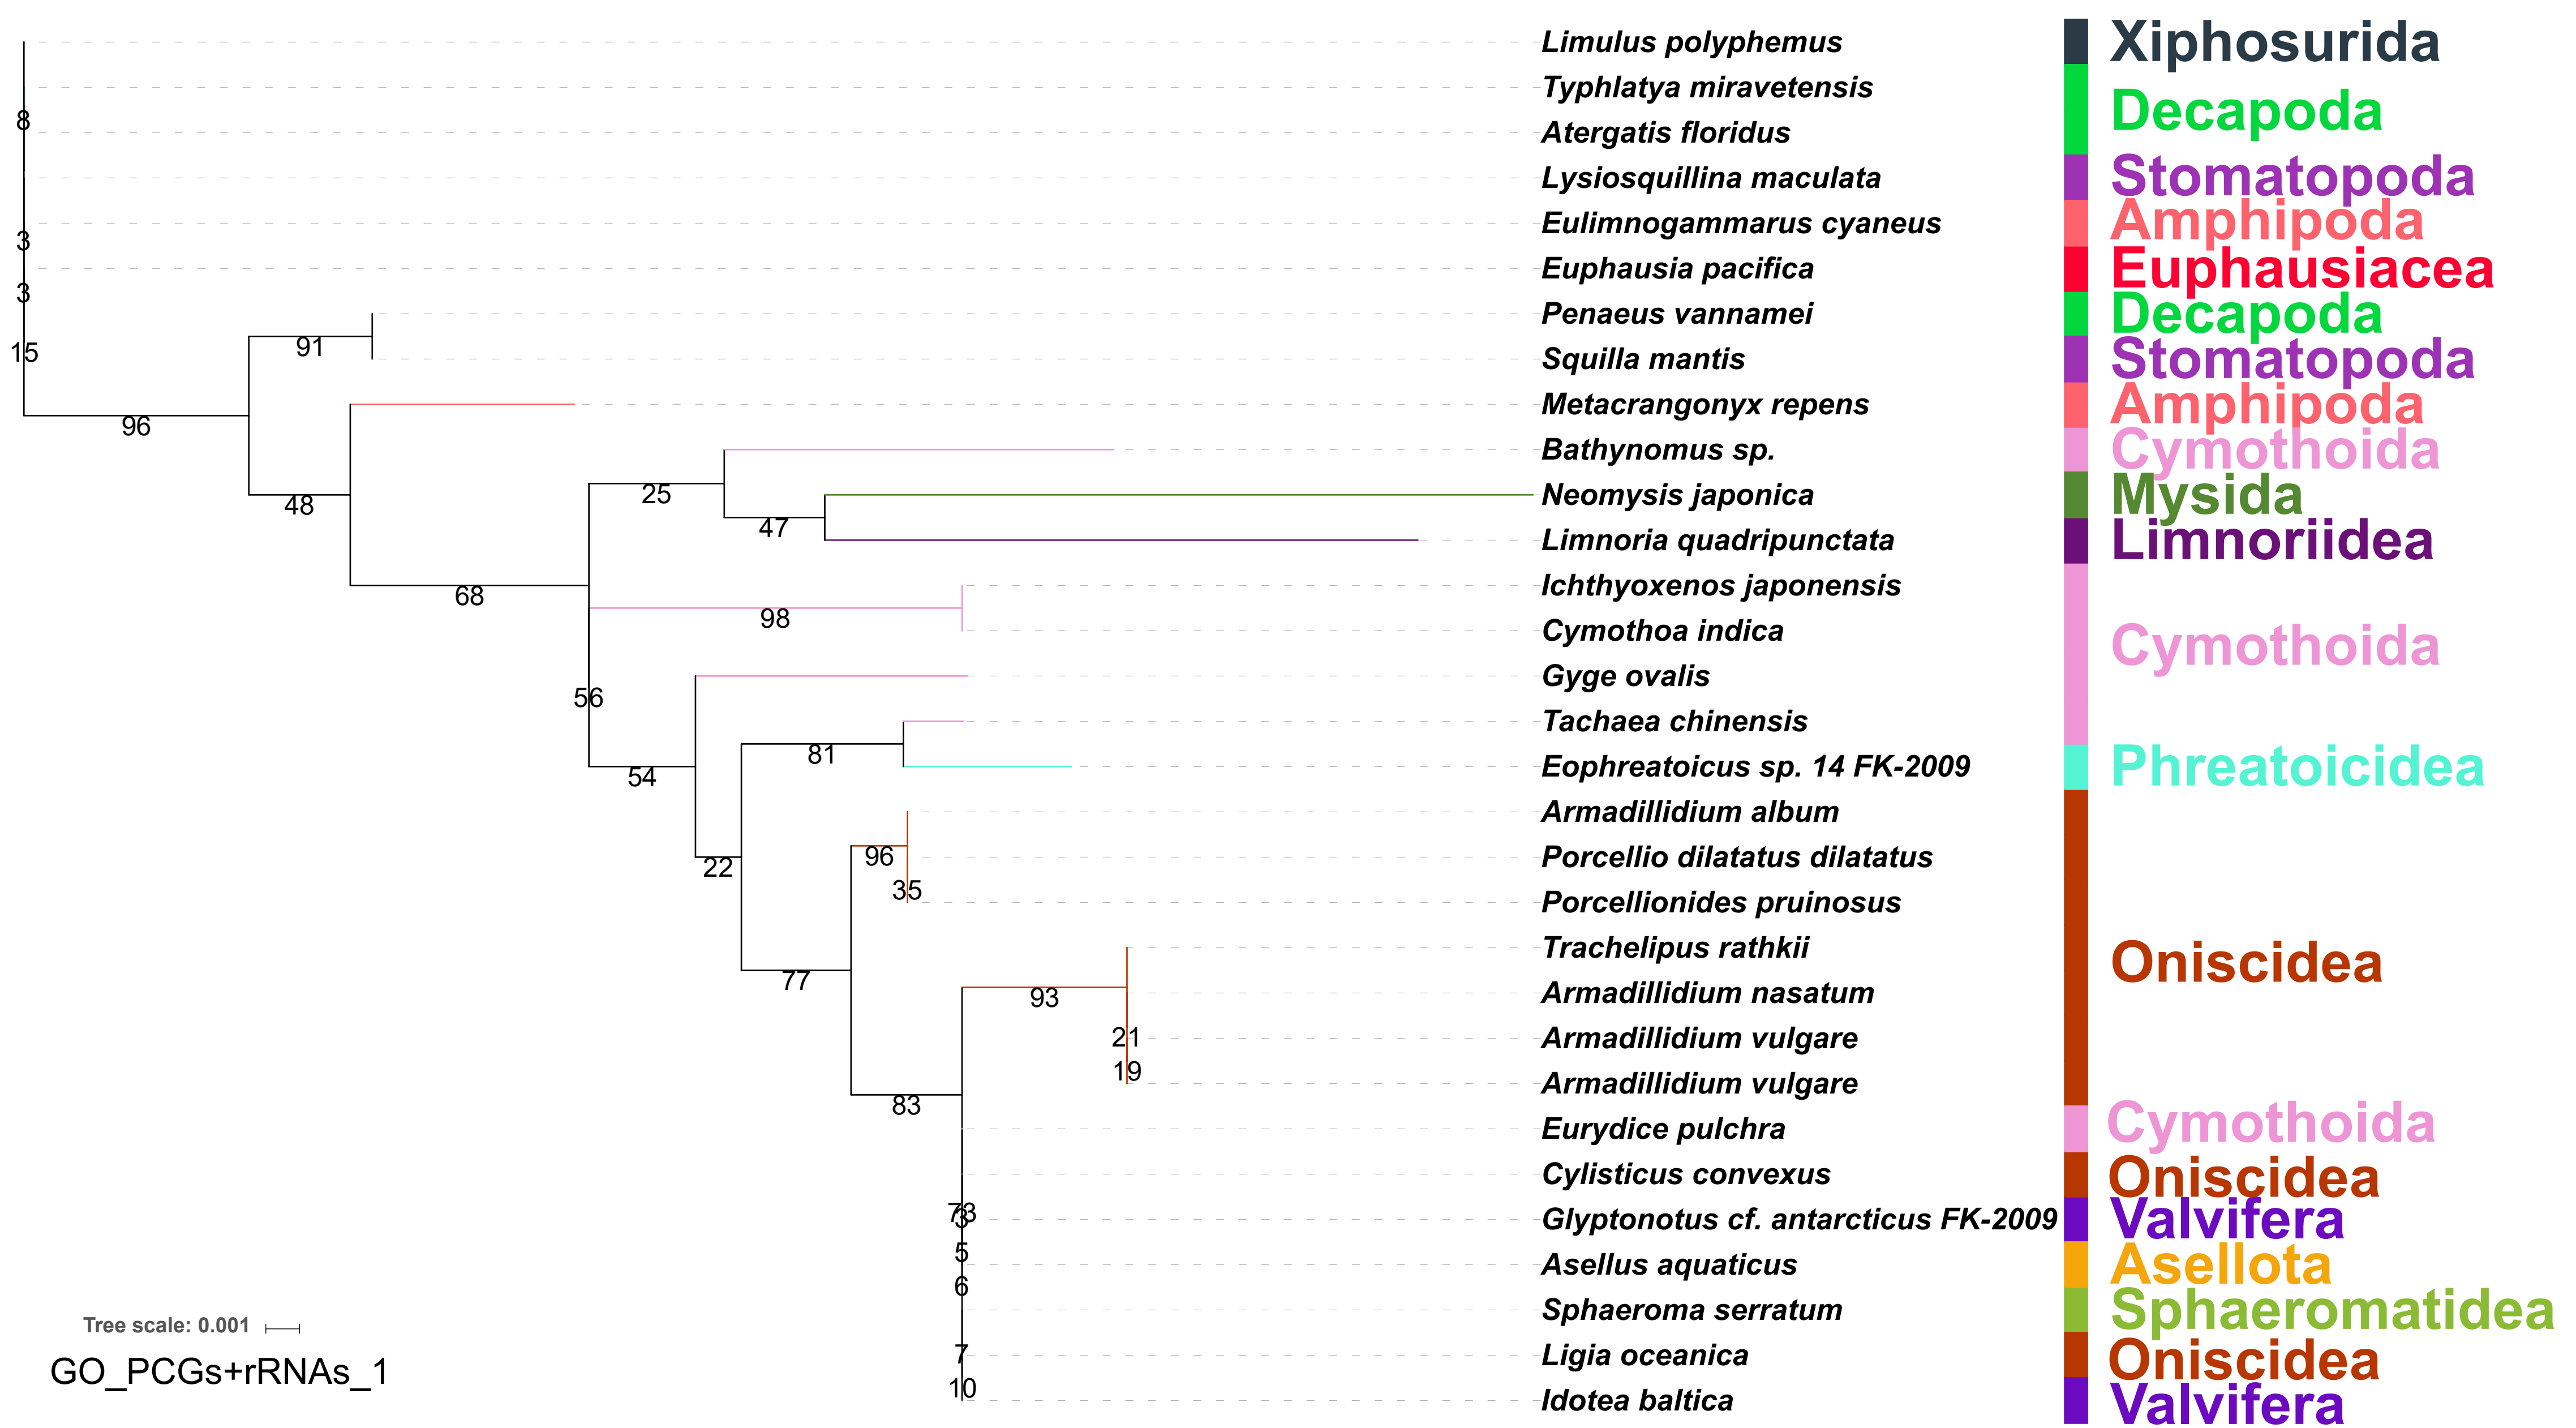

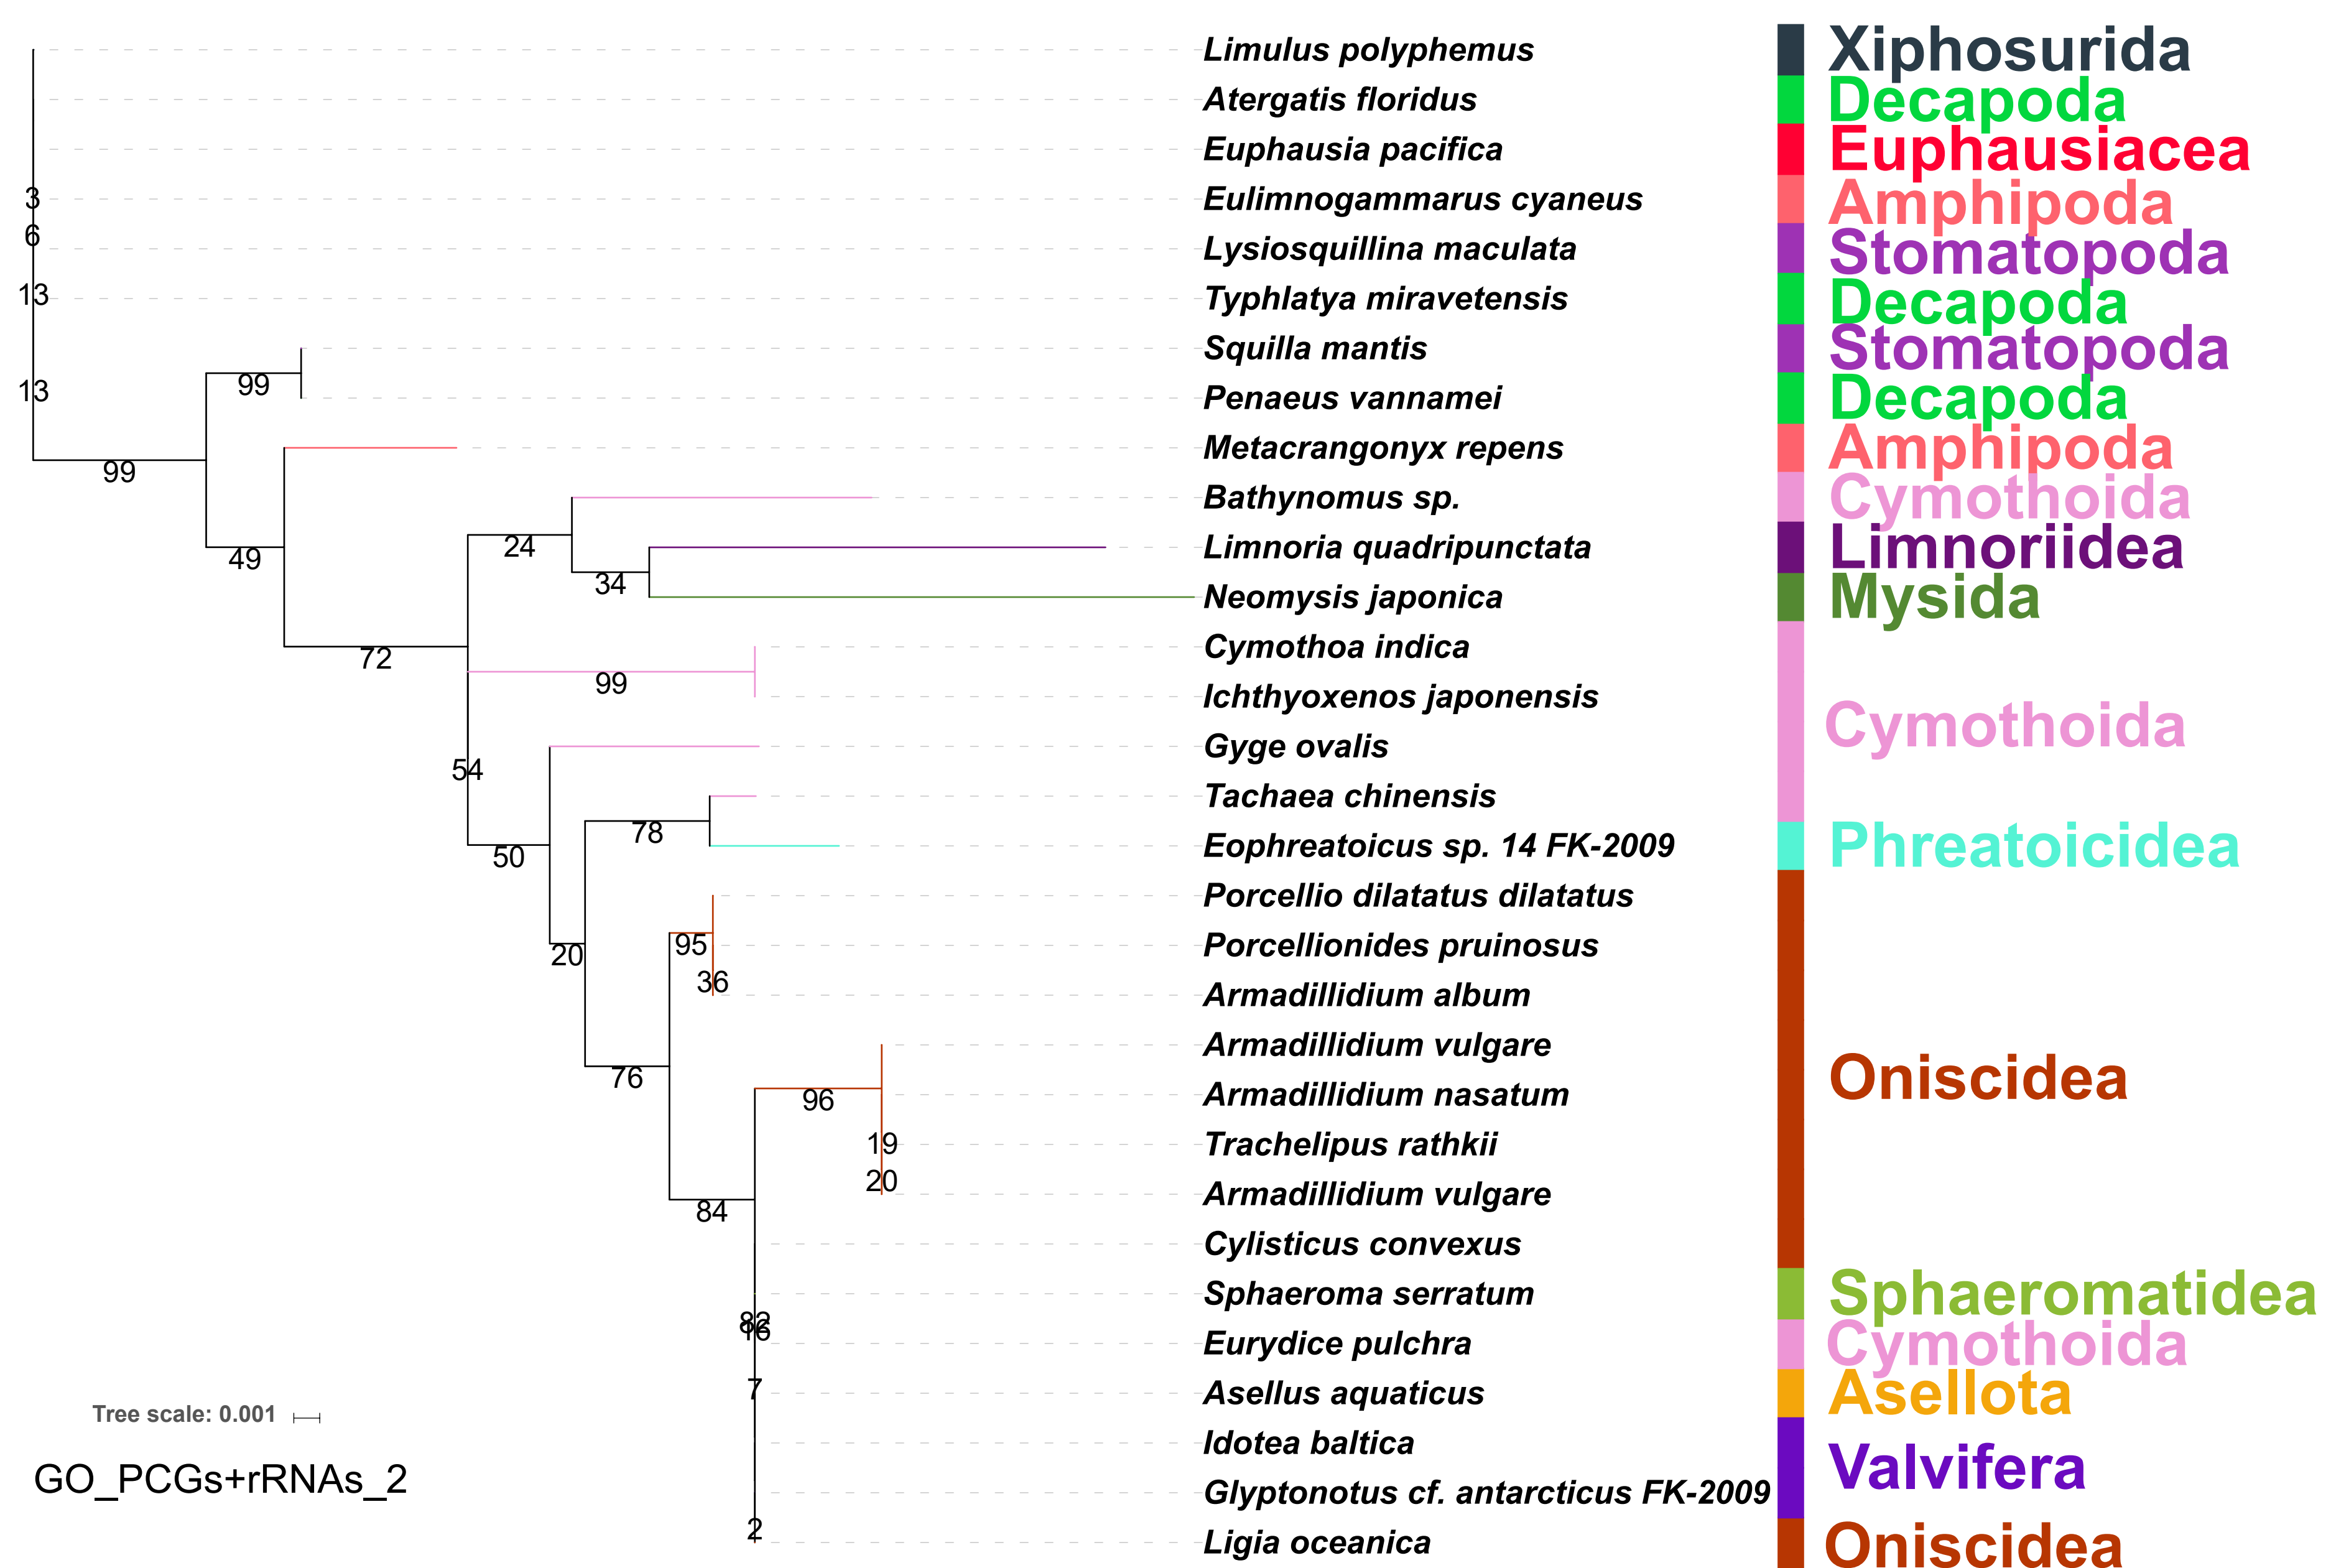

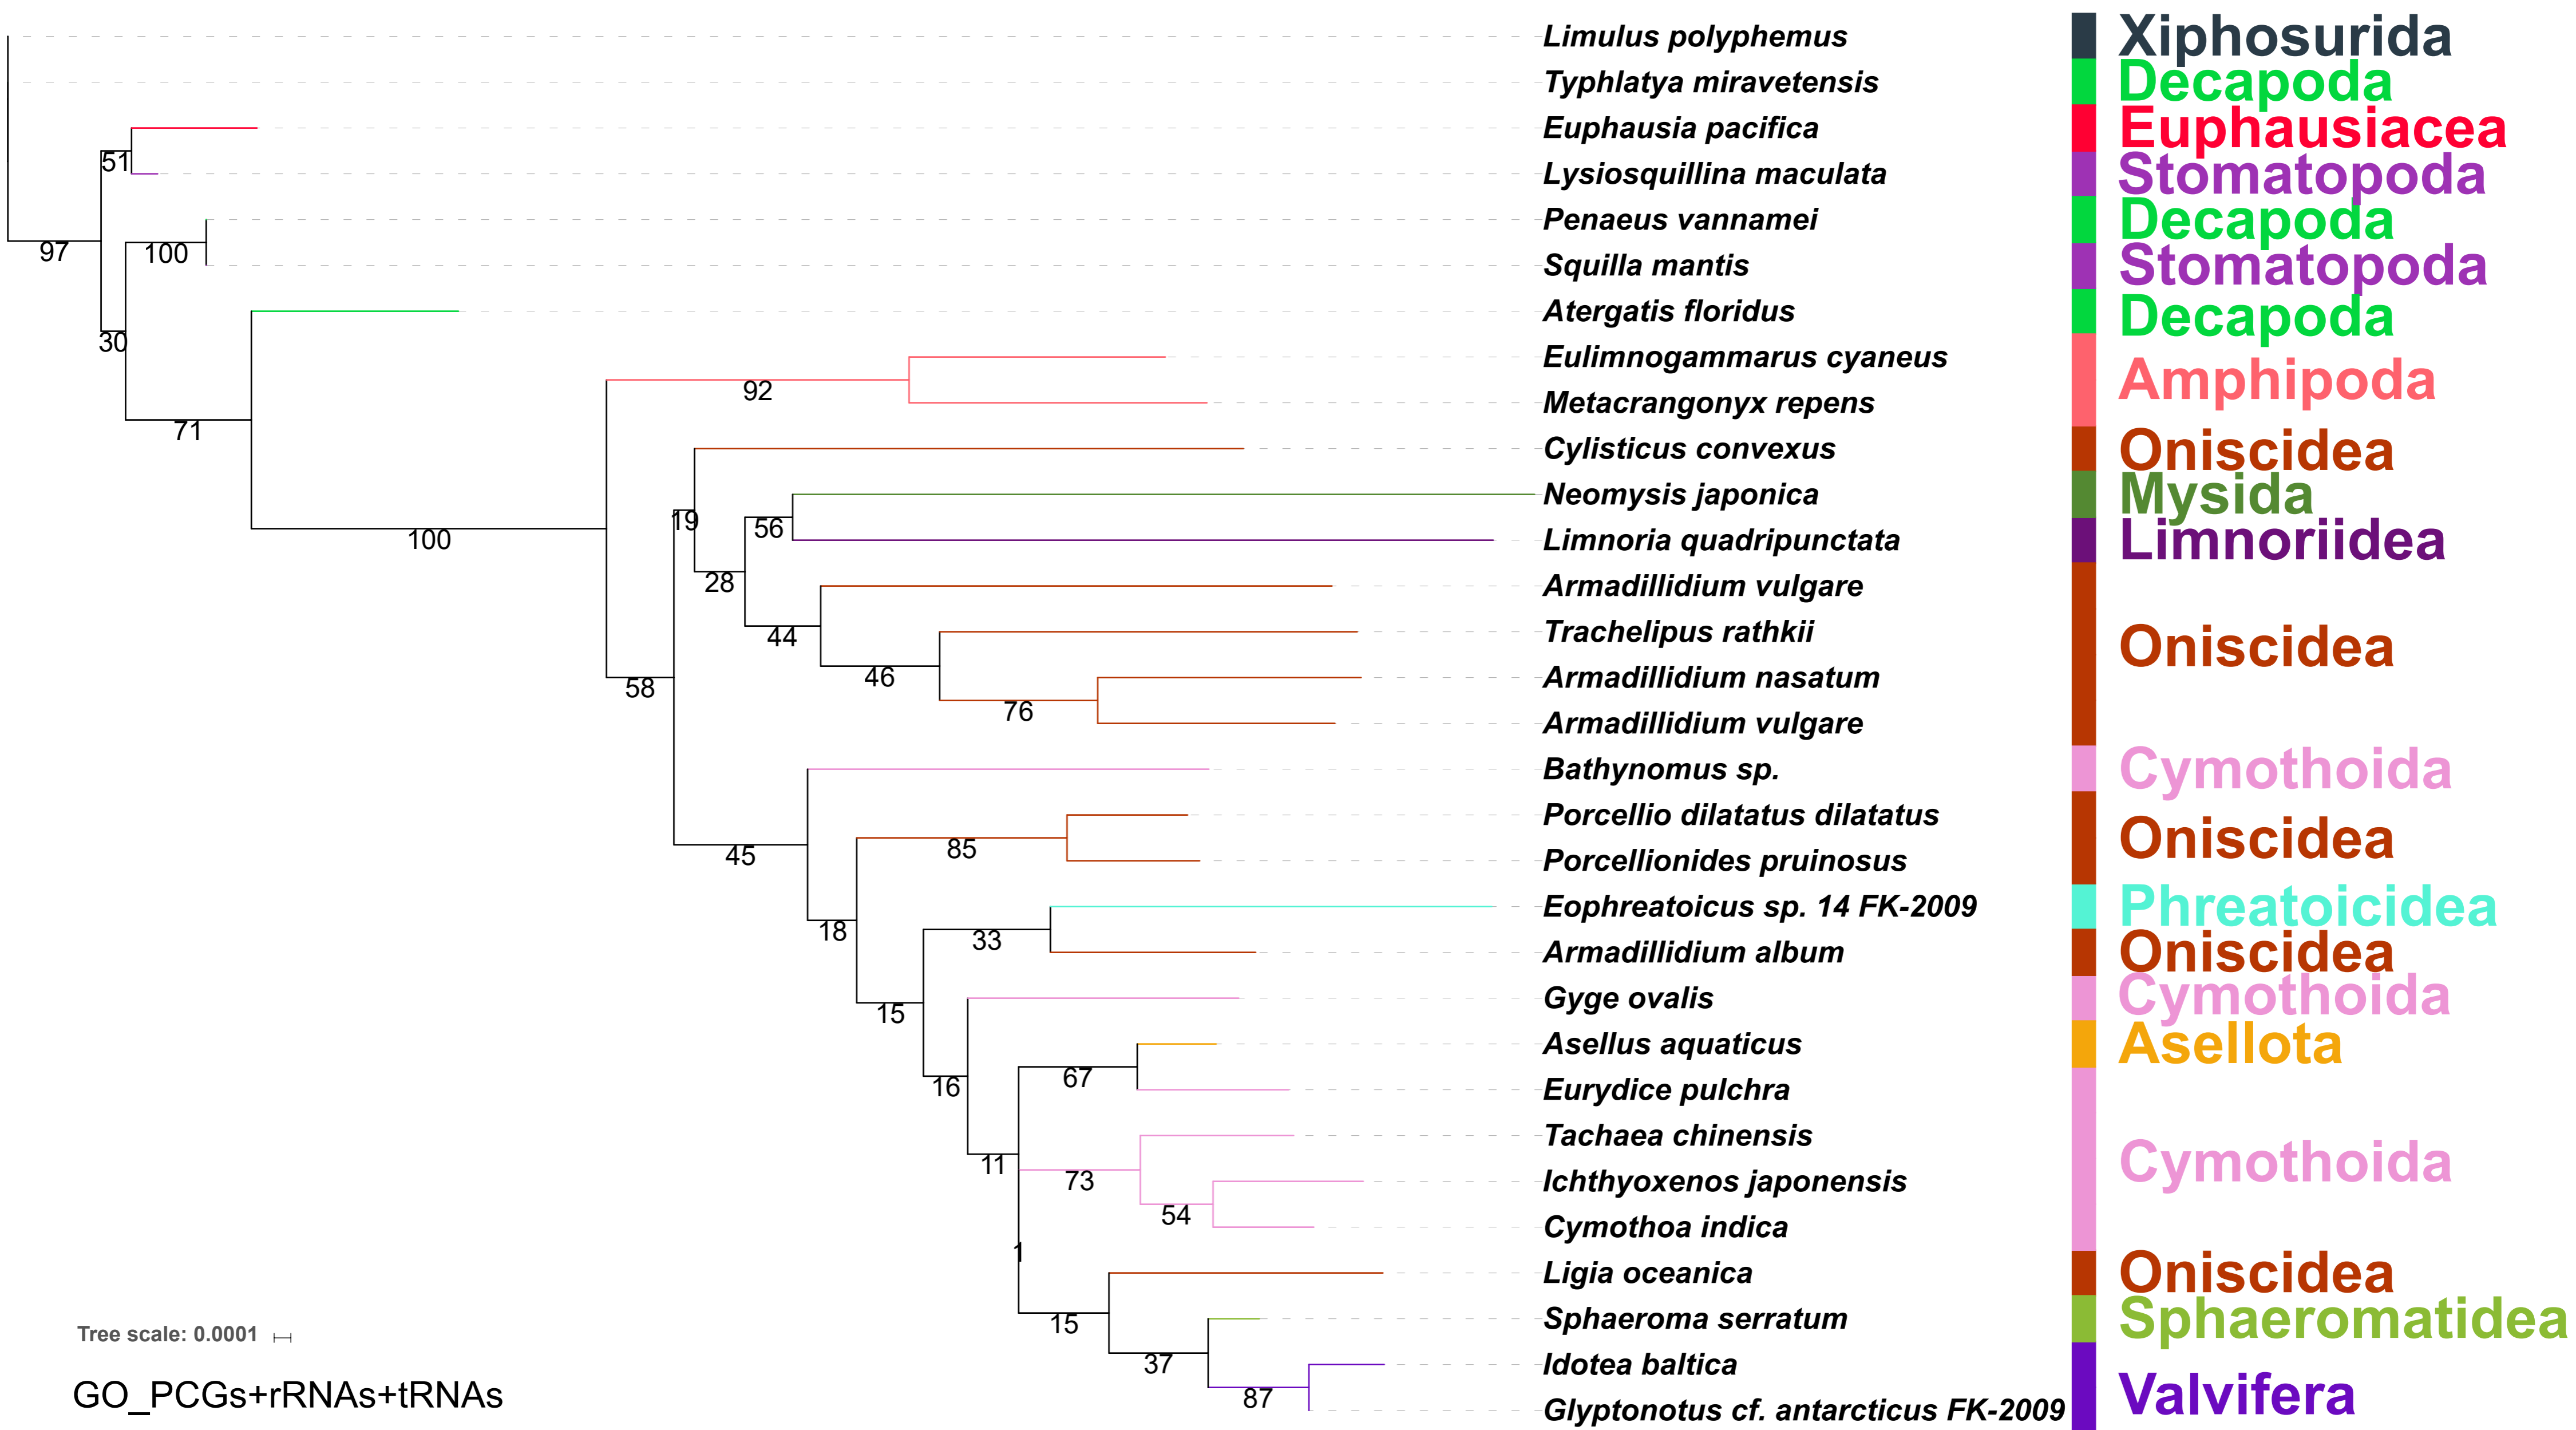

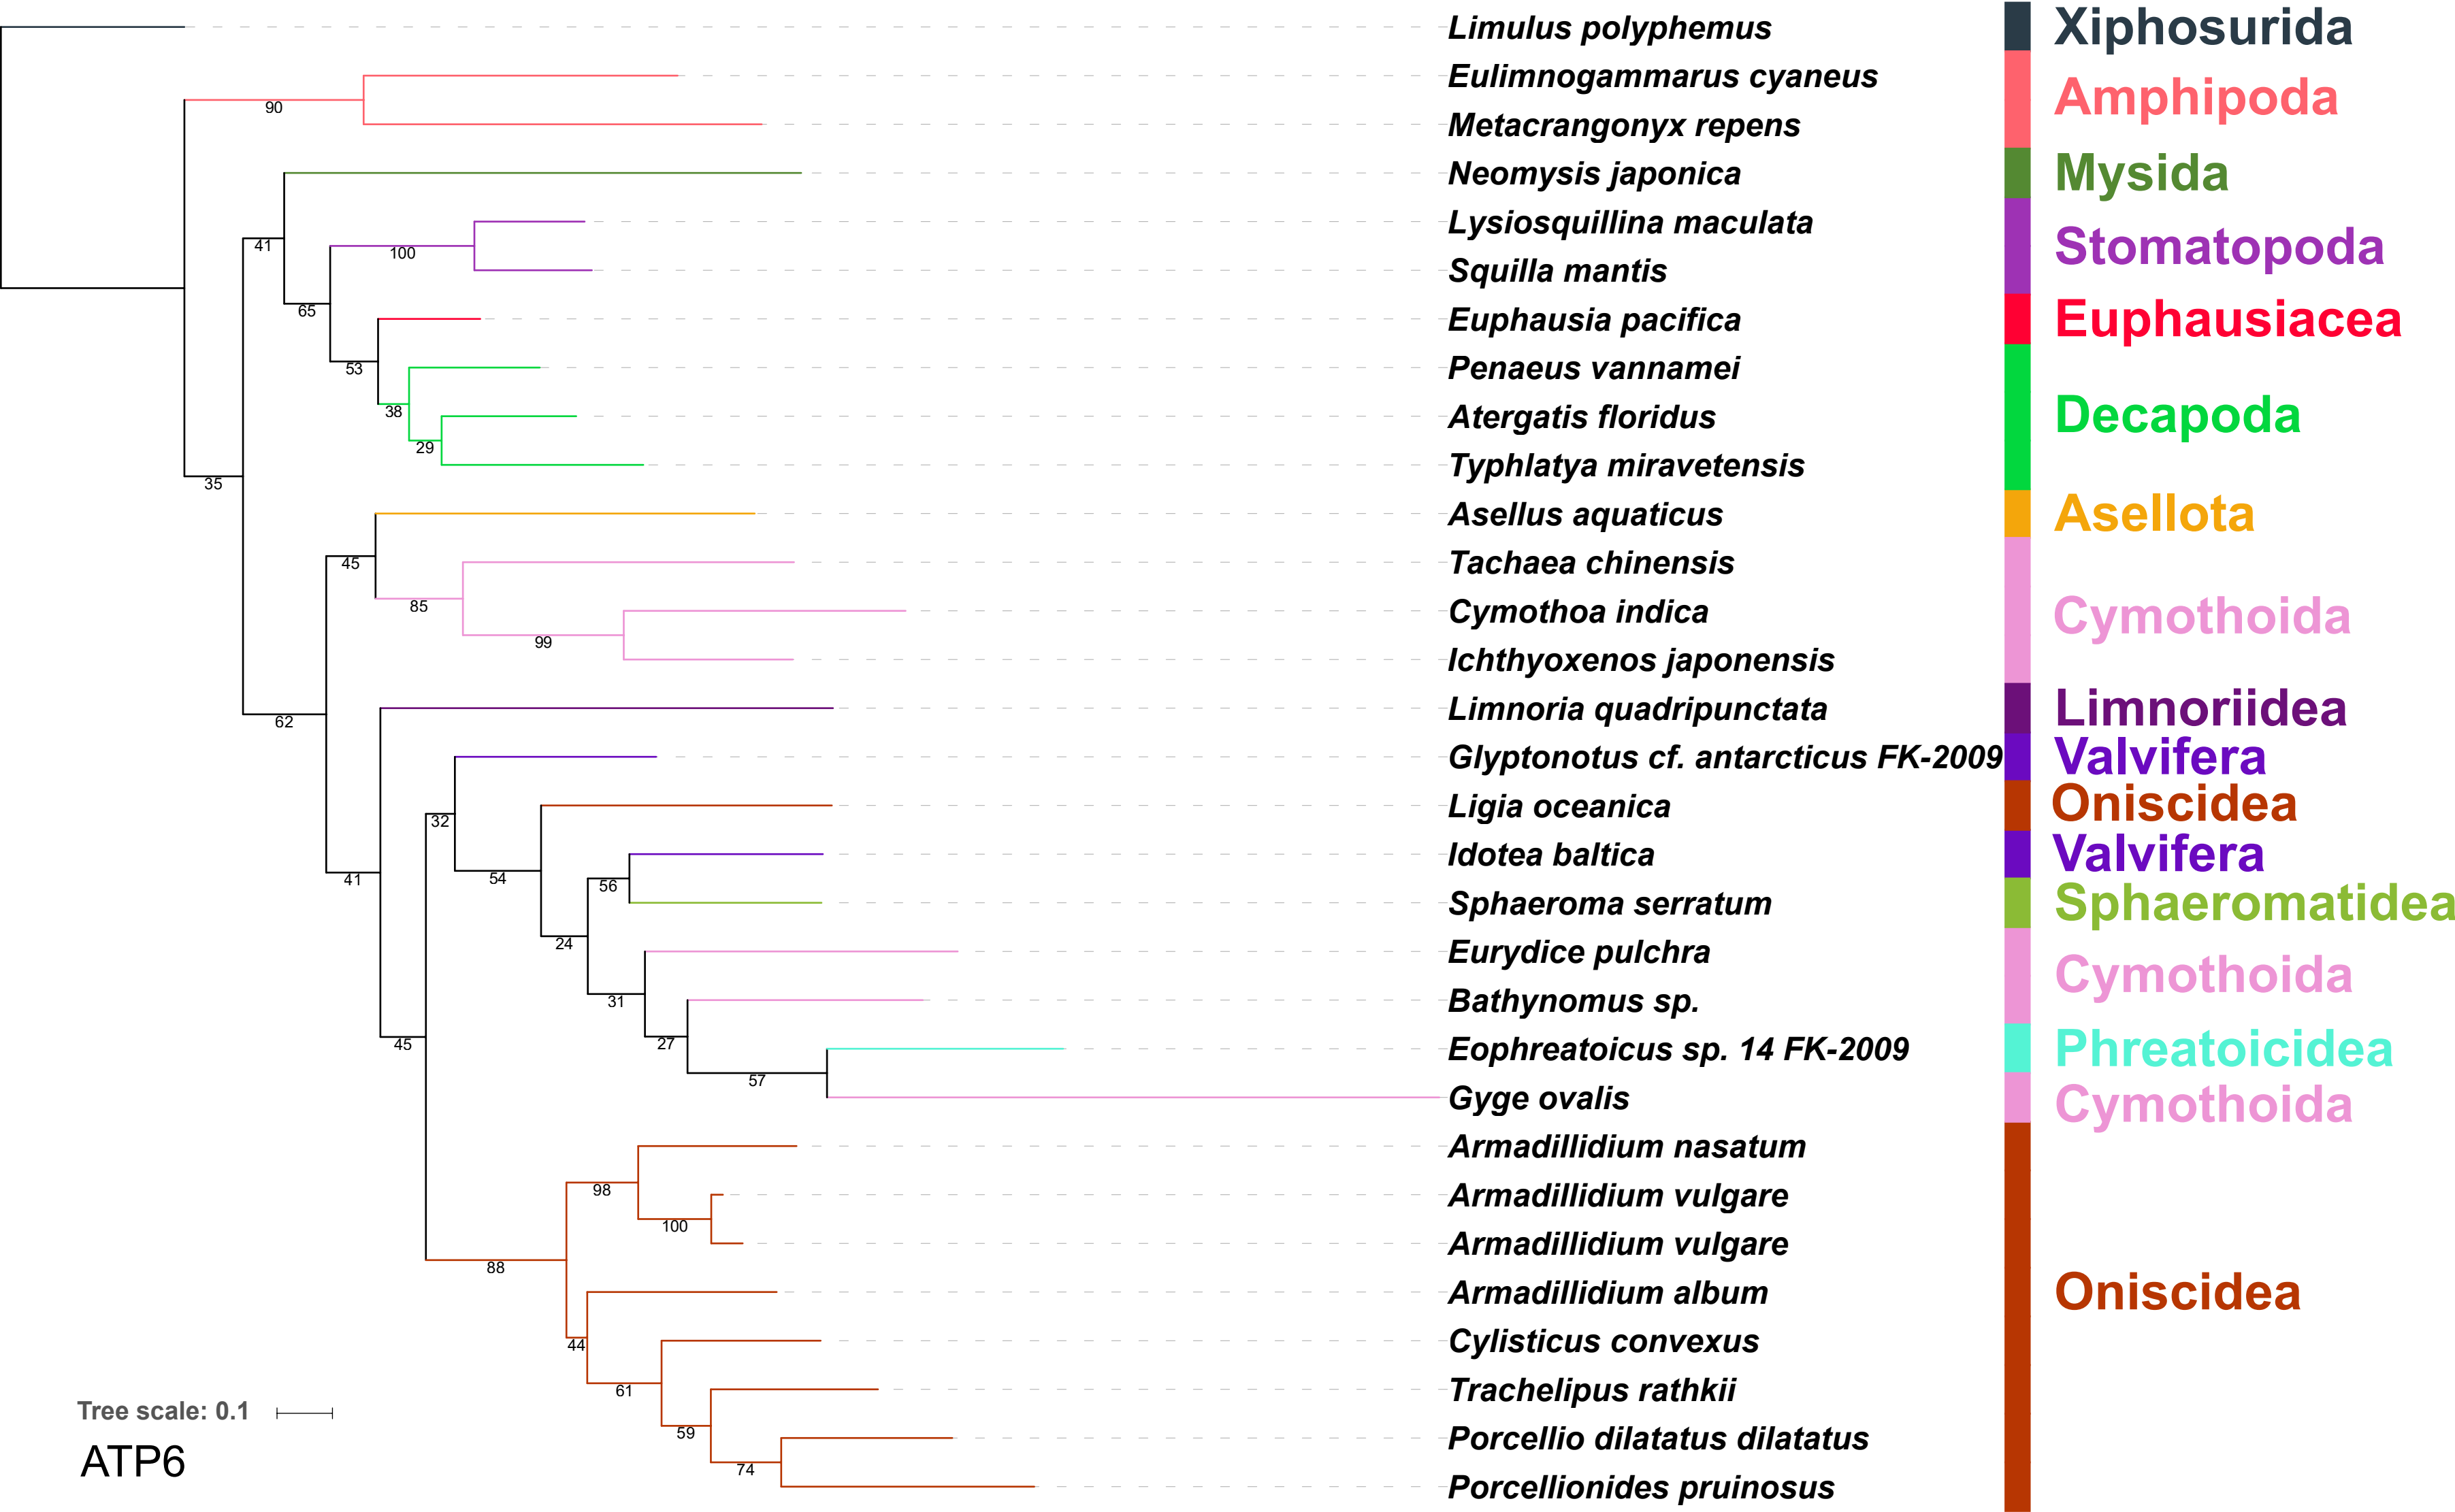

Tree scale: 0.1  
 ATP6

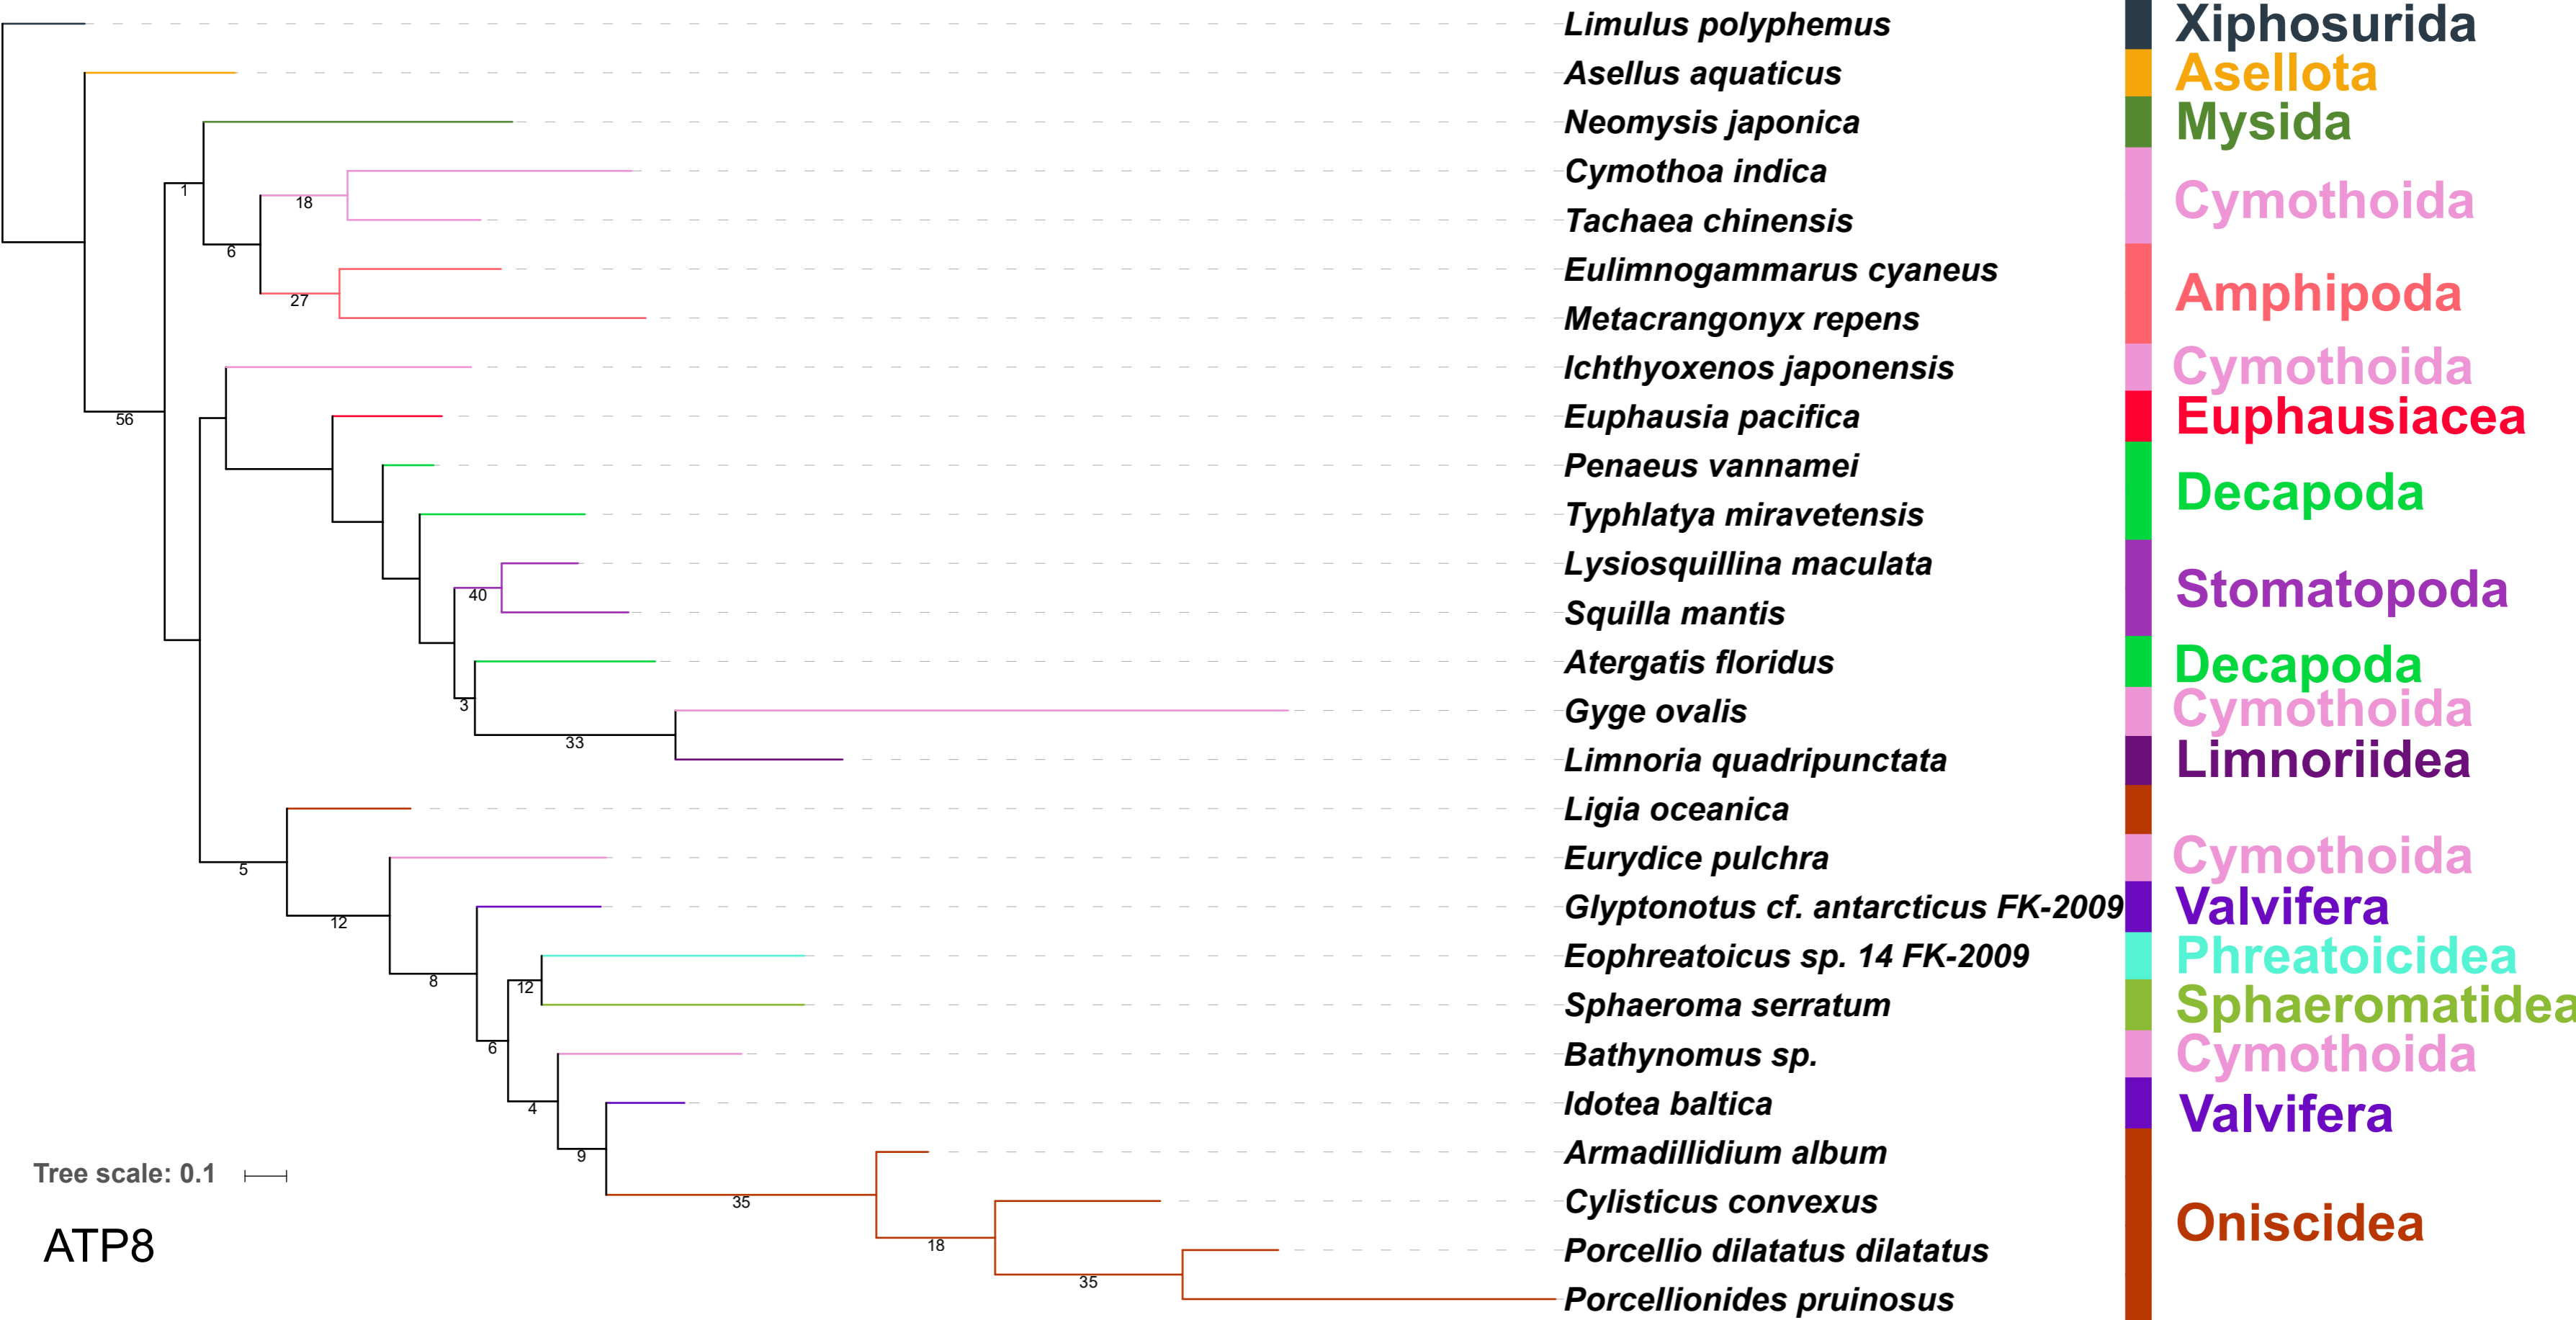

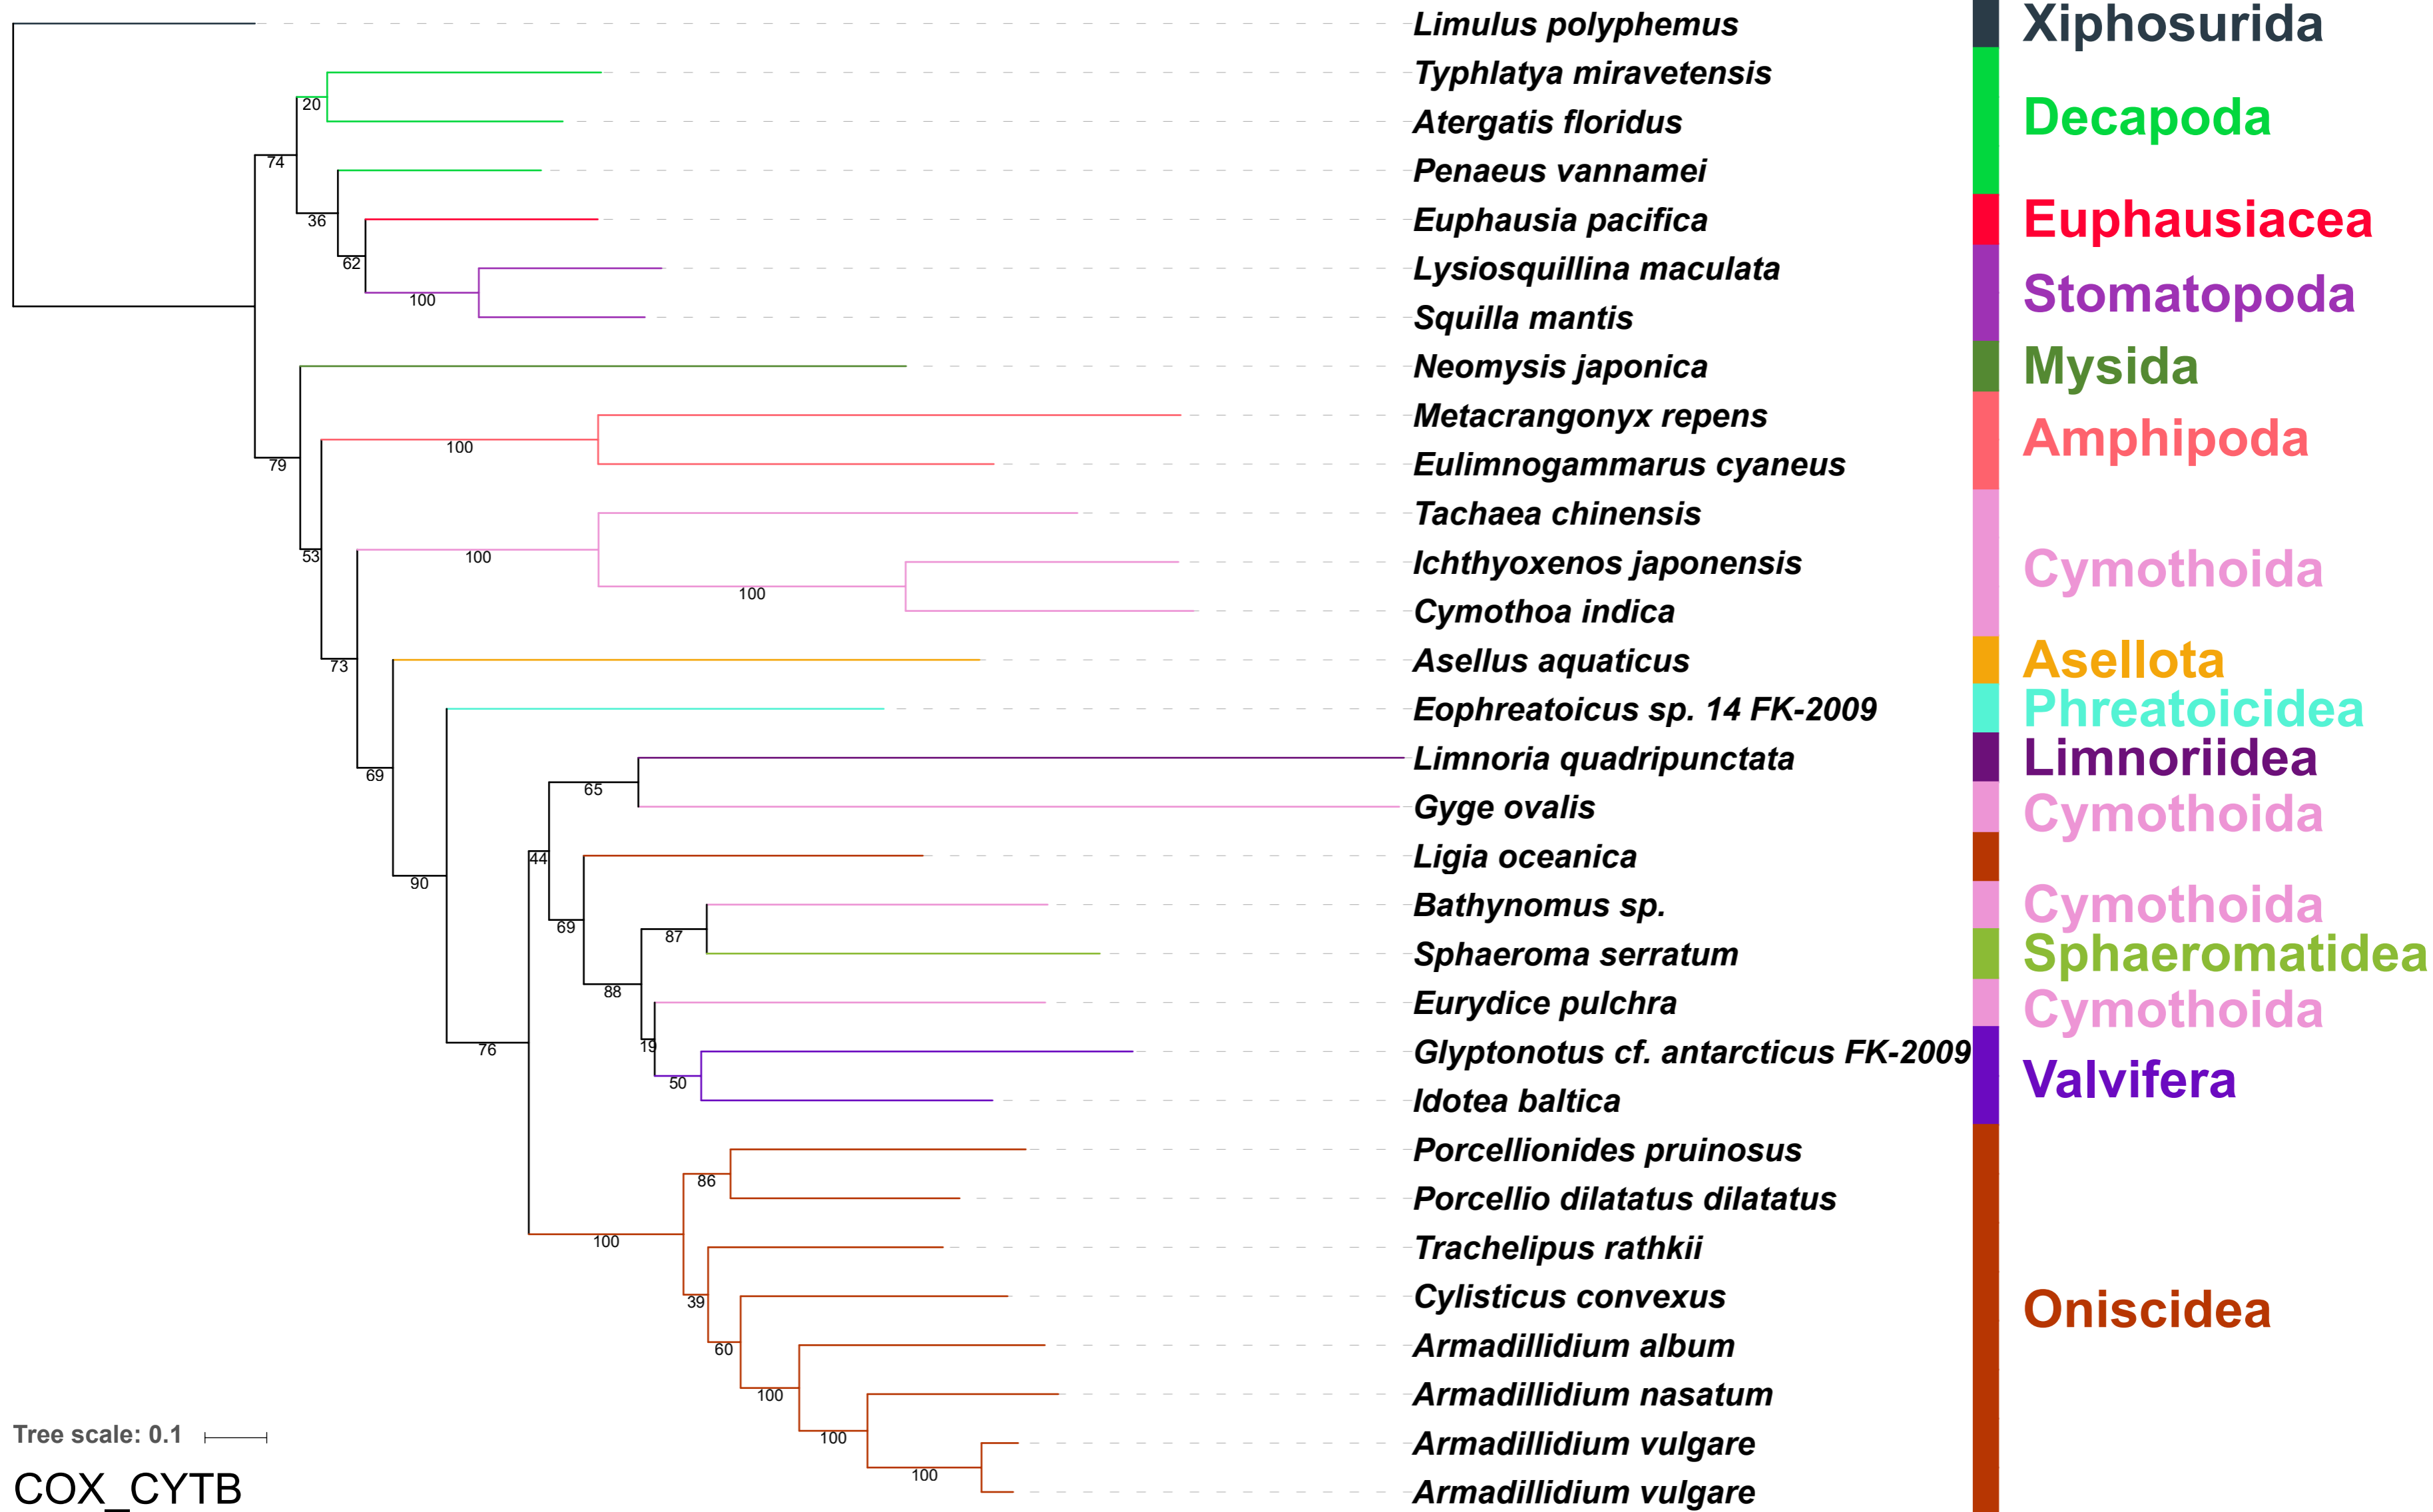



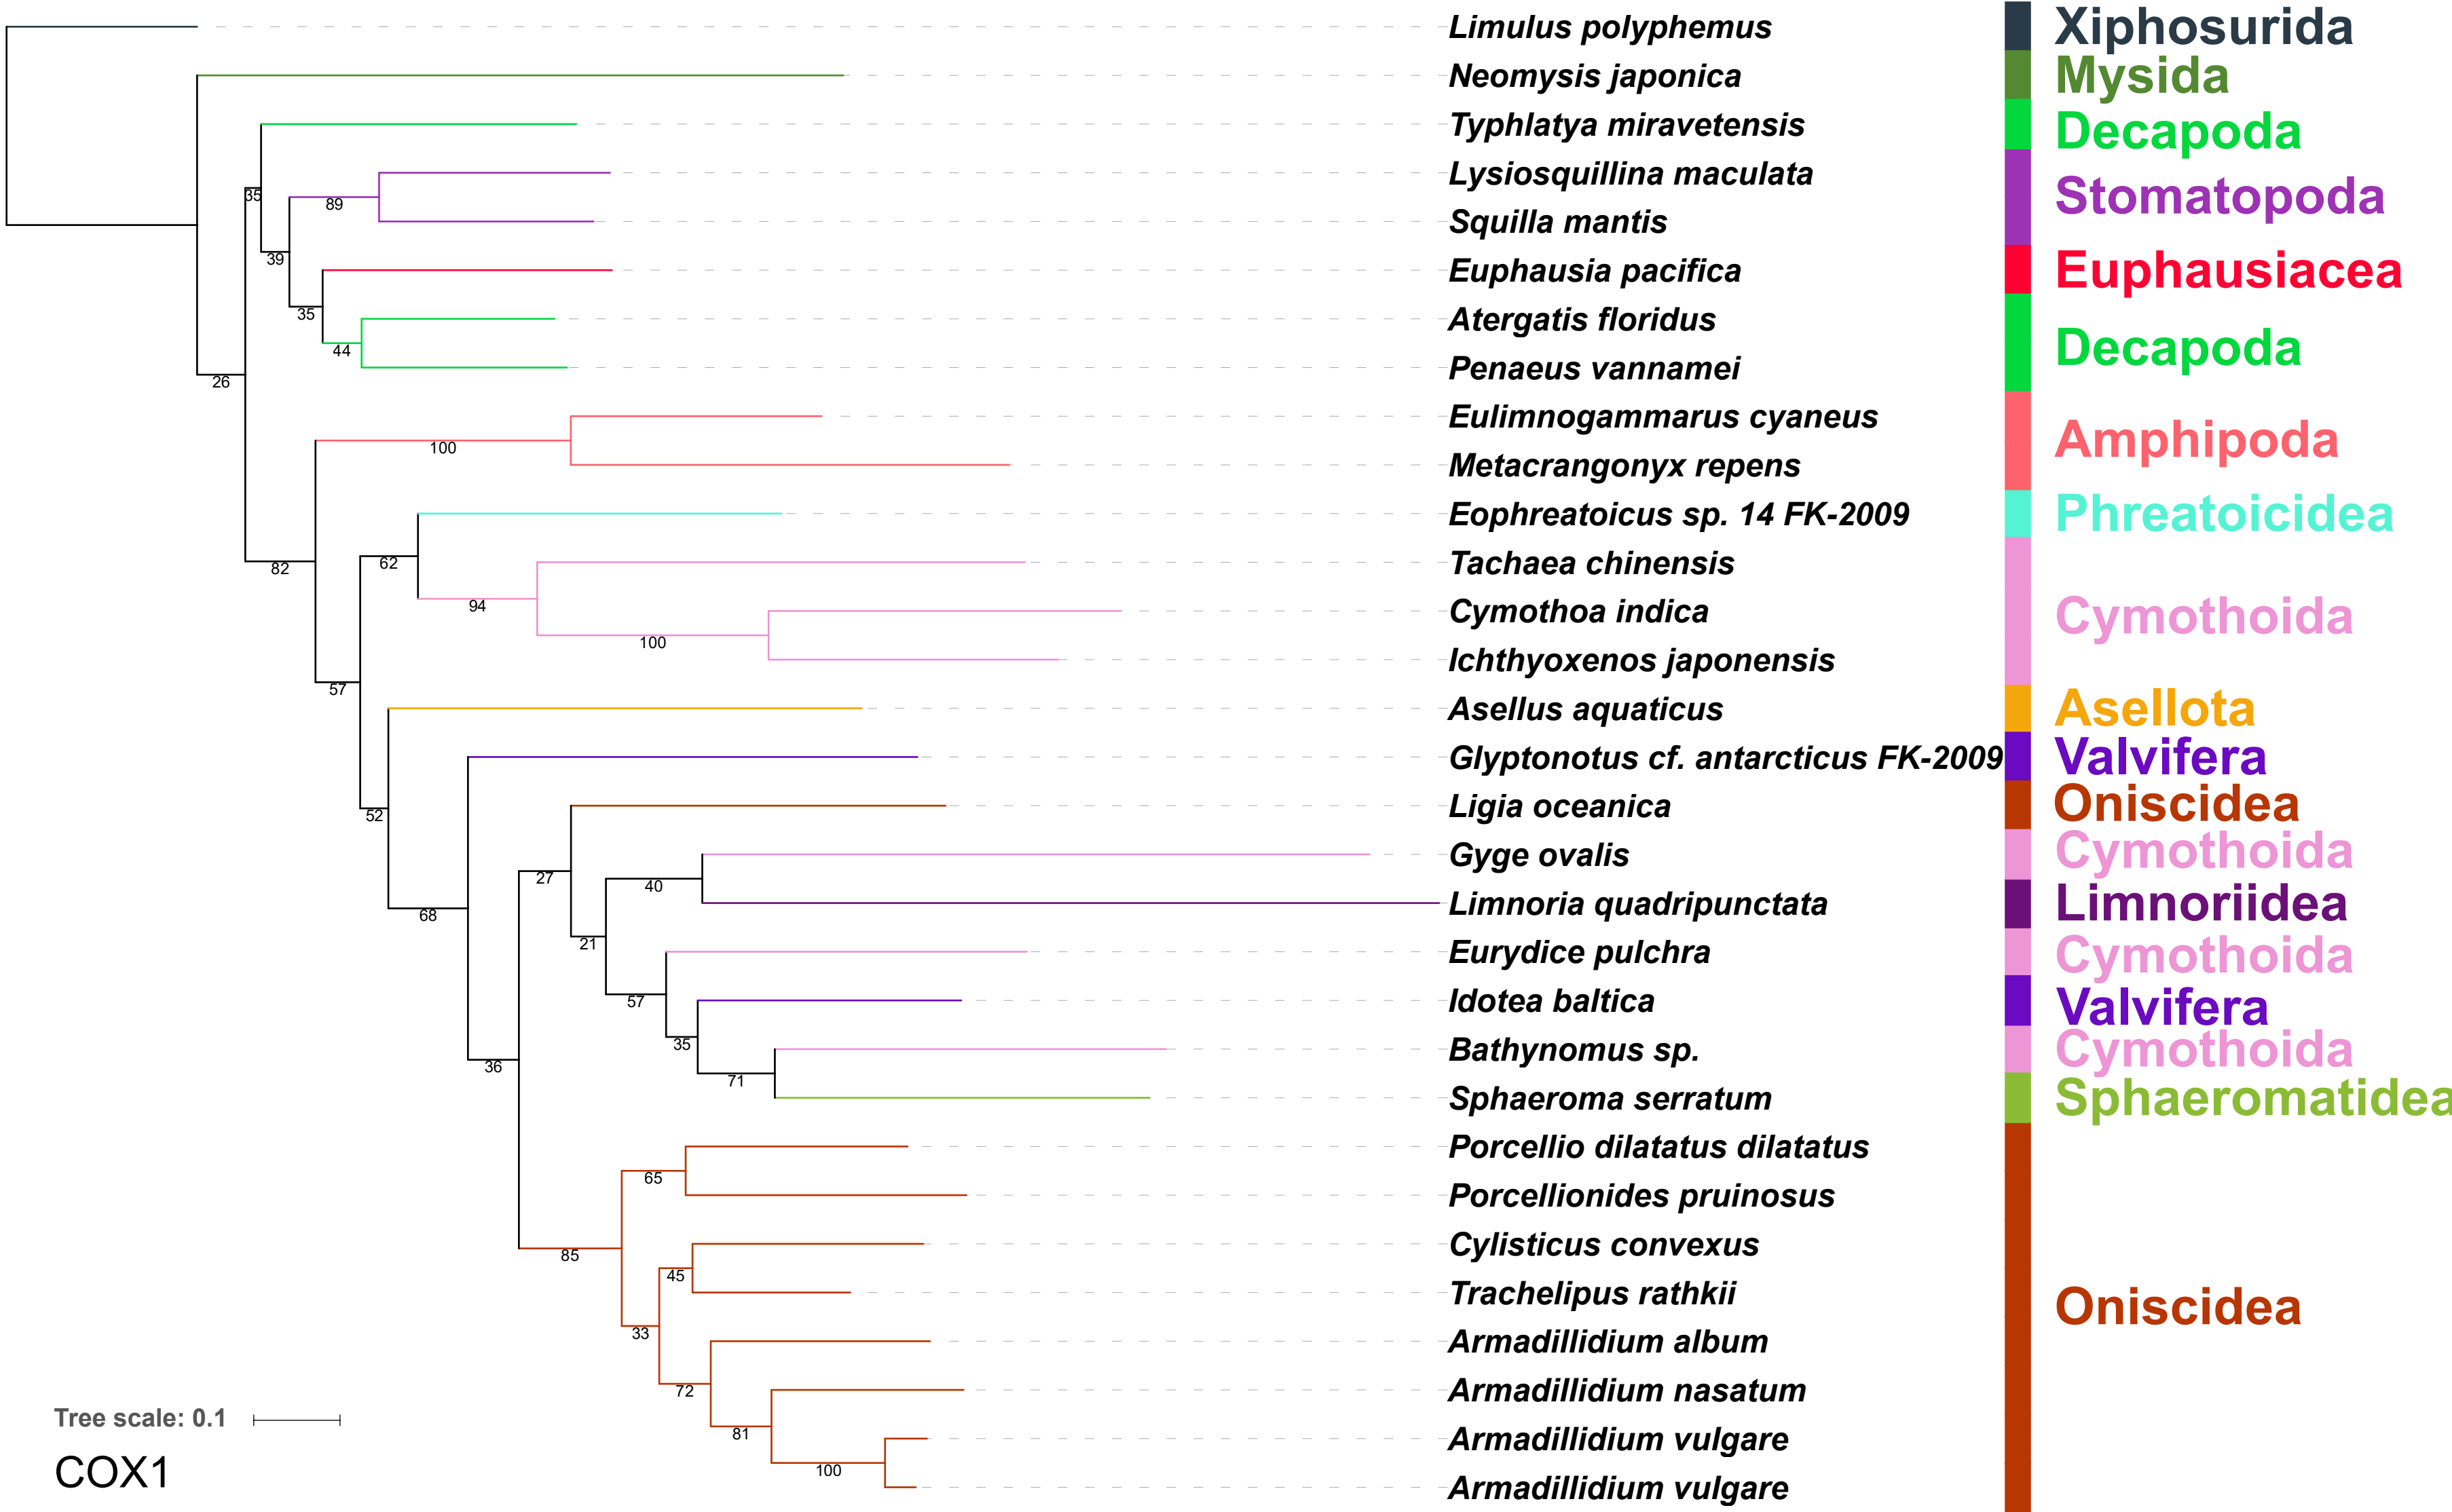

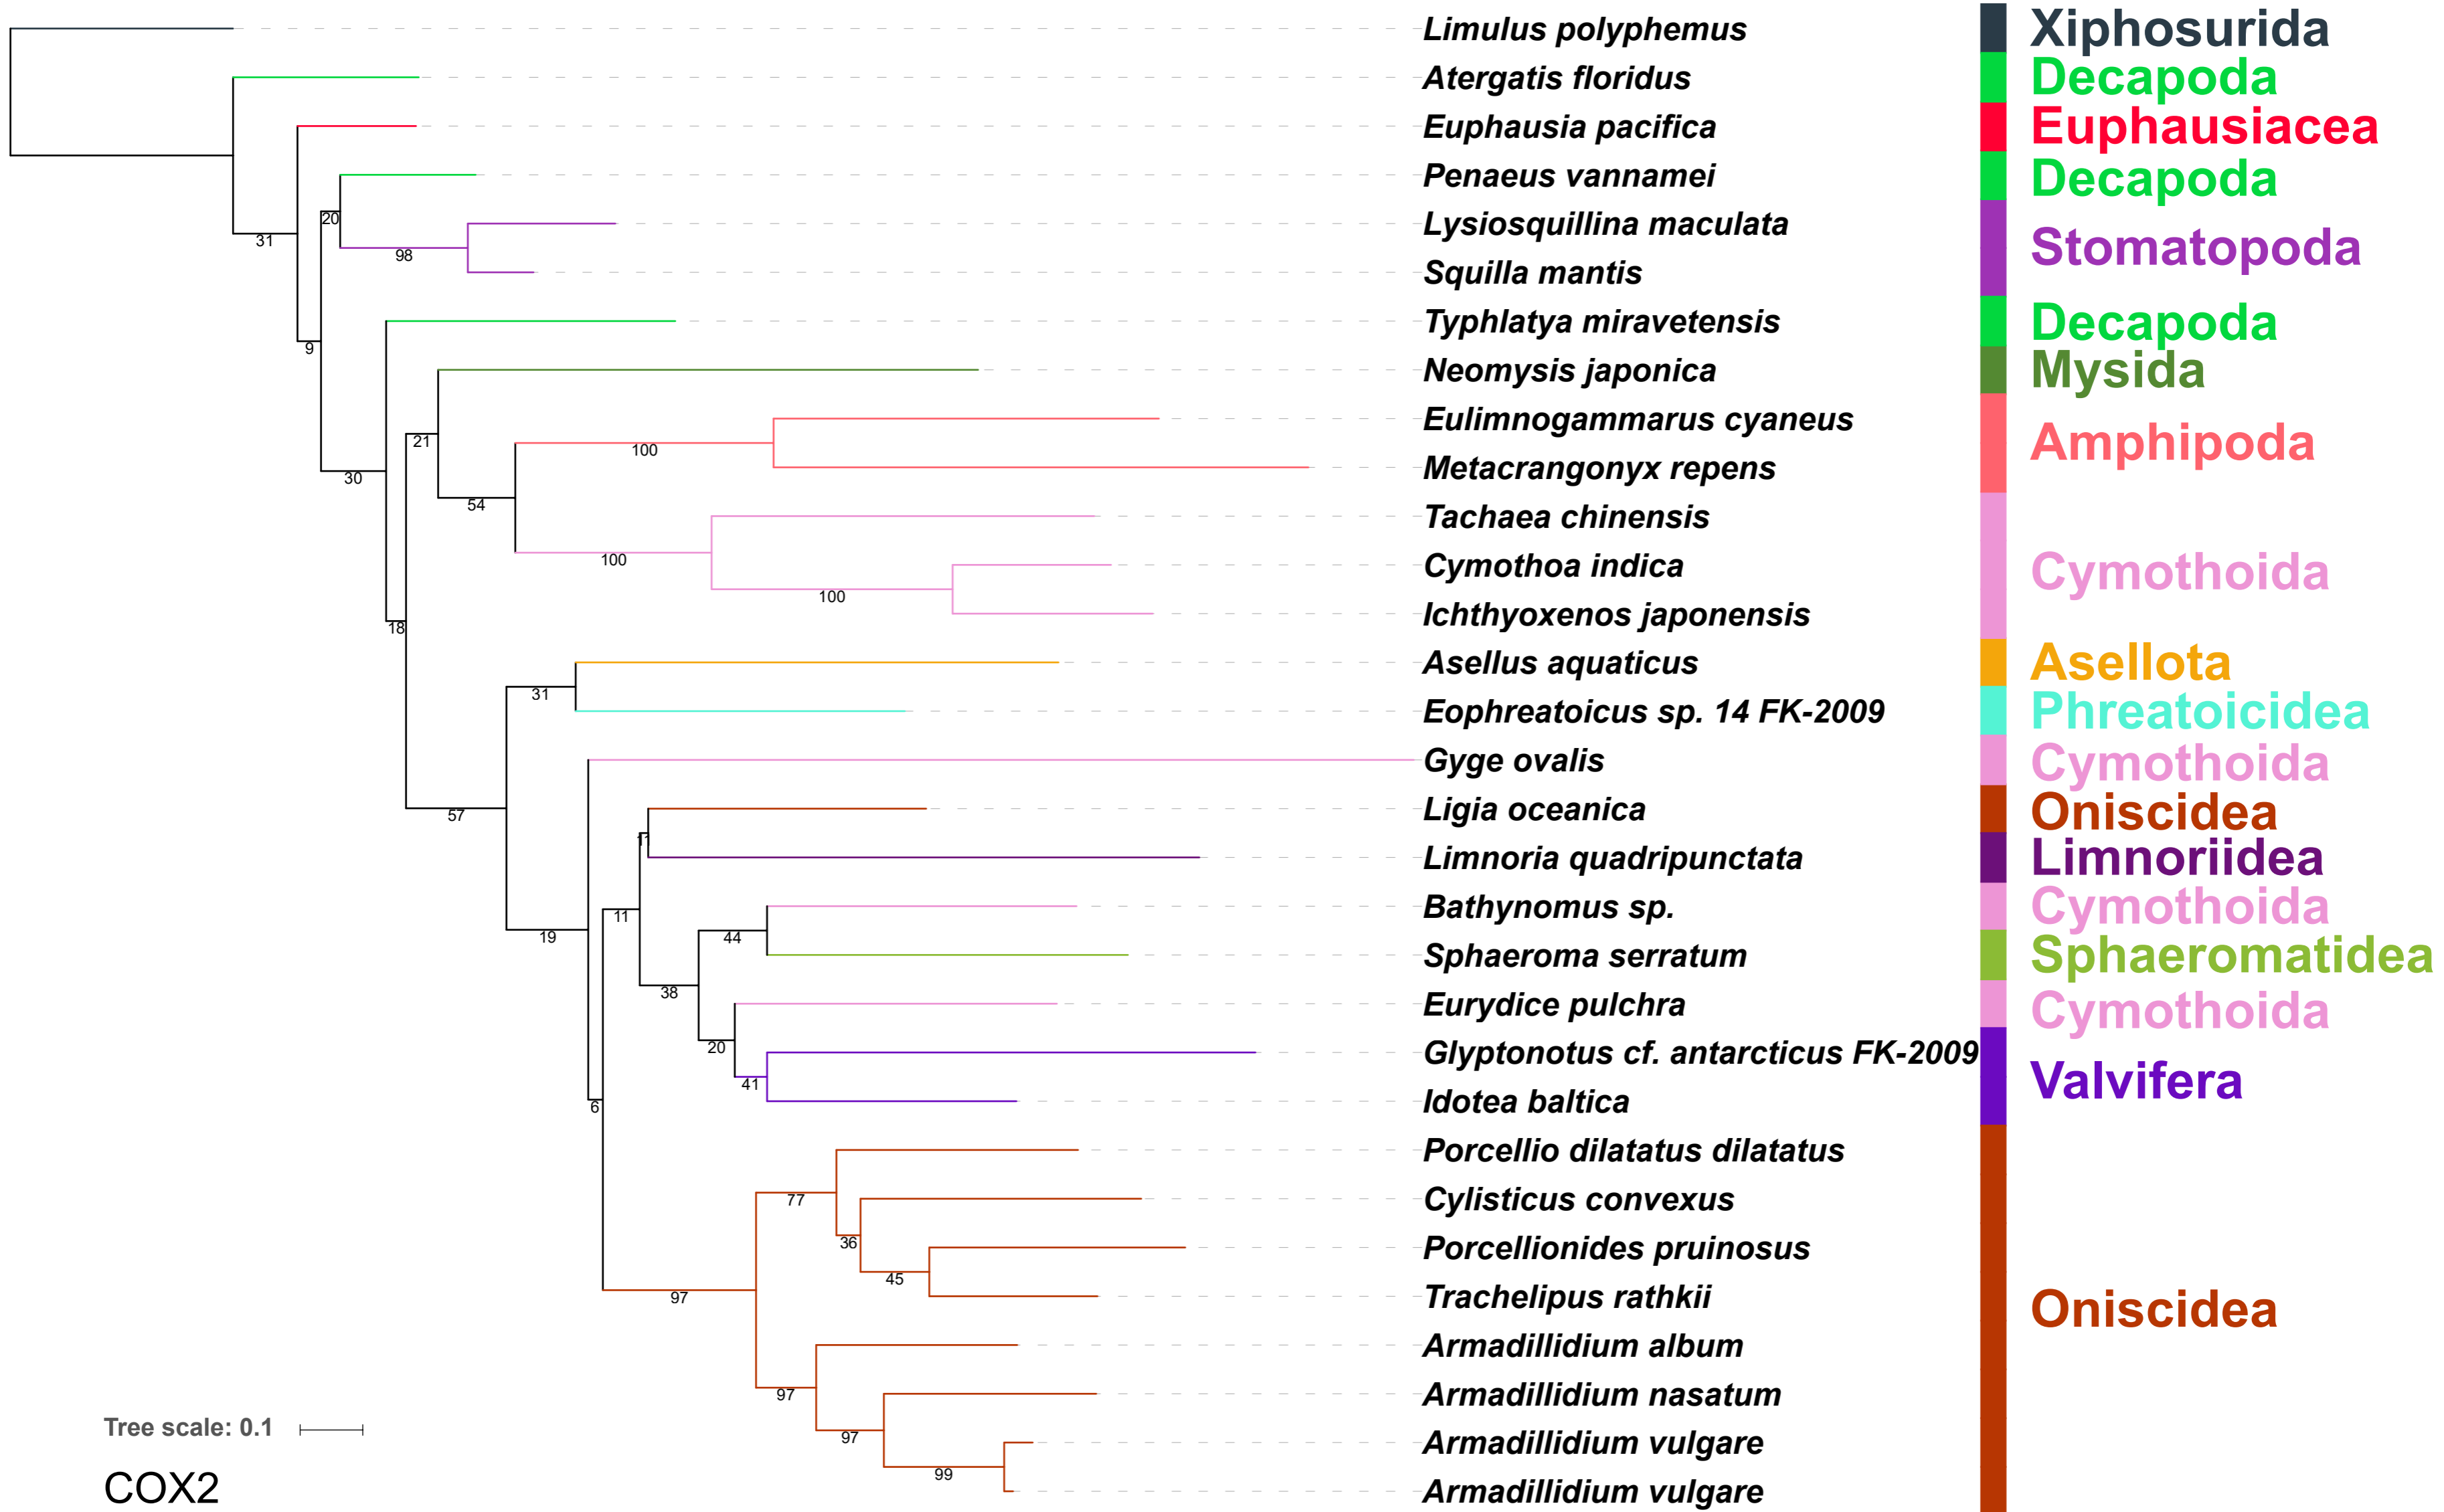

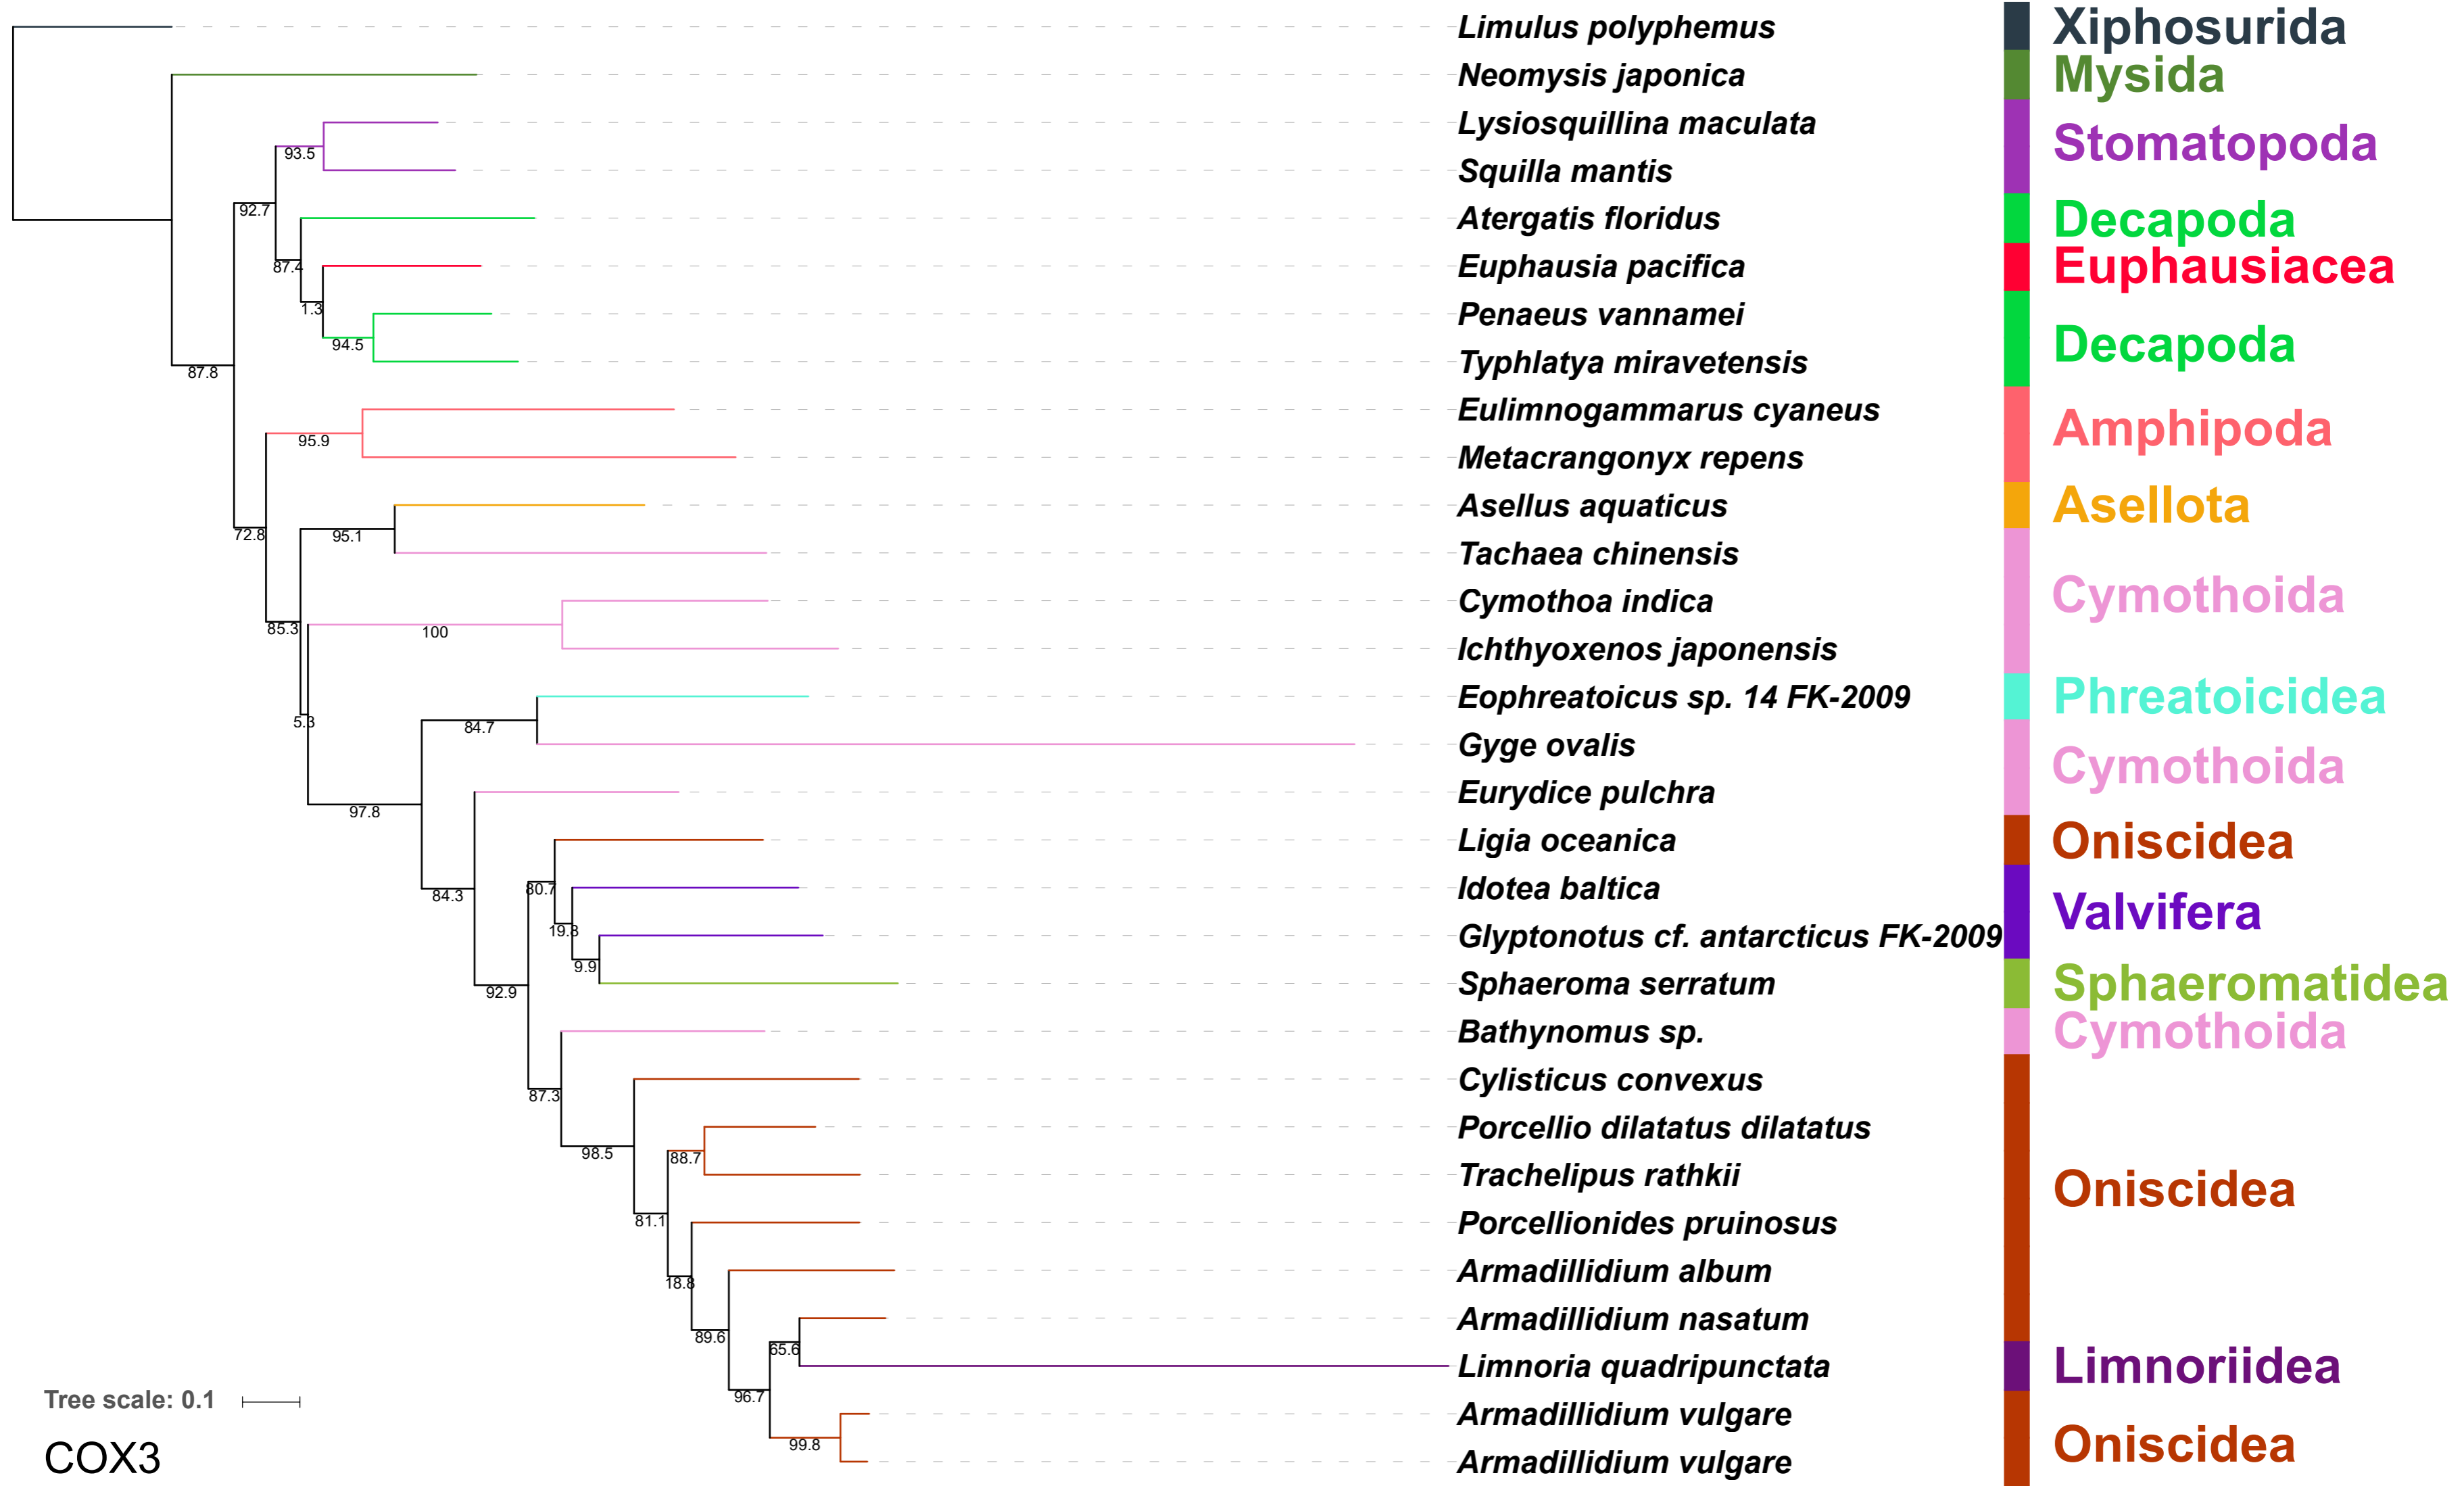

Tree scale: 0.1

COX3

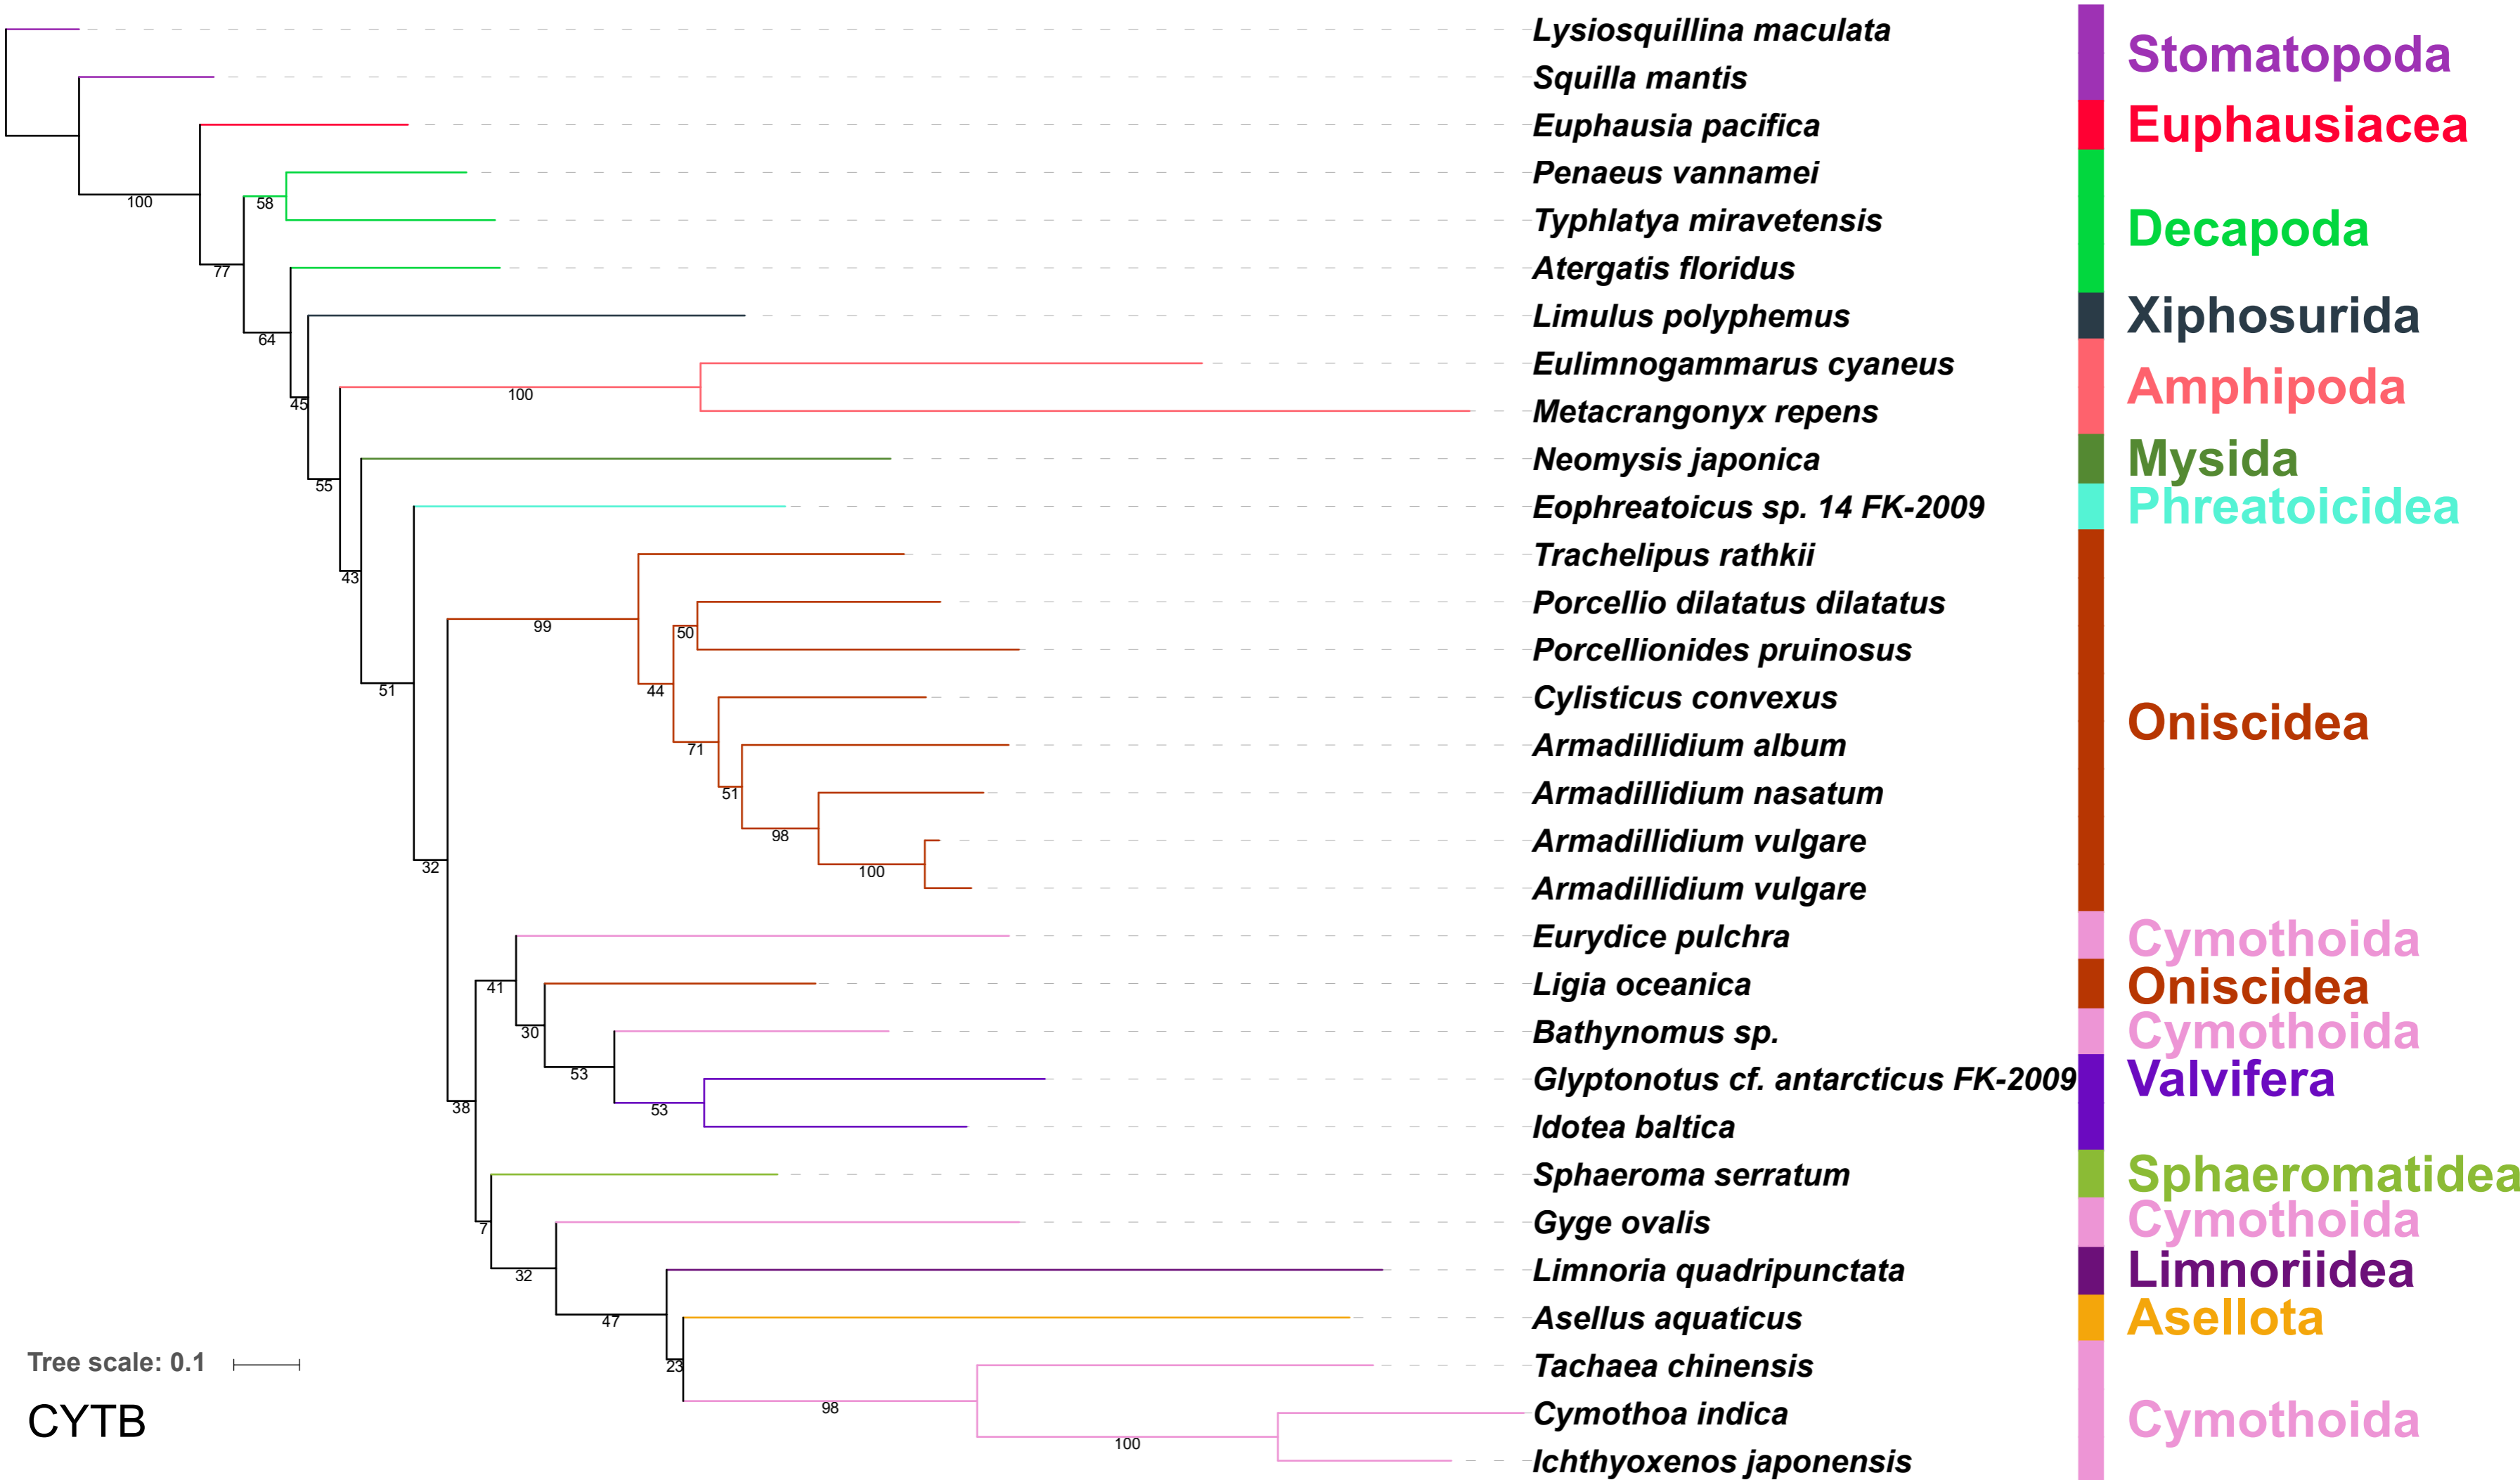

Tree scale: 0.1

CYTB

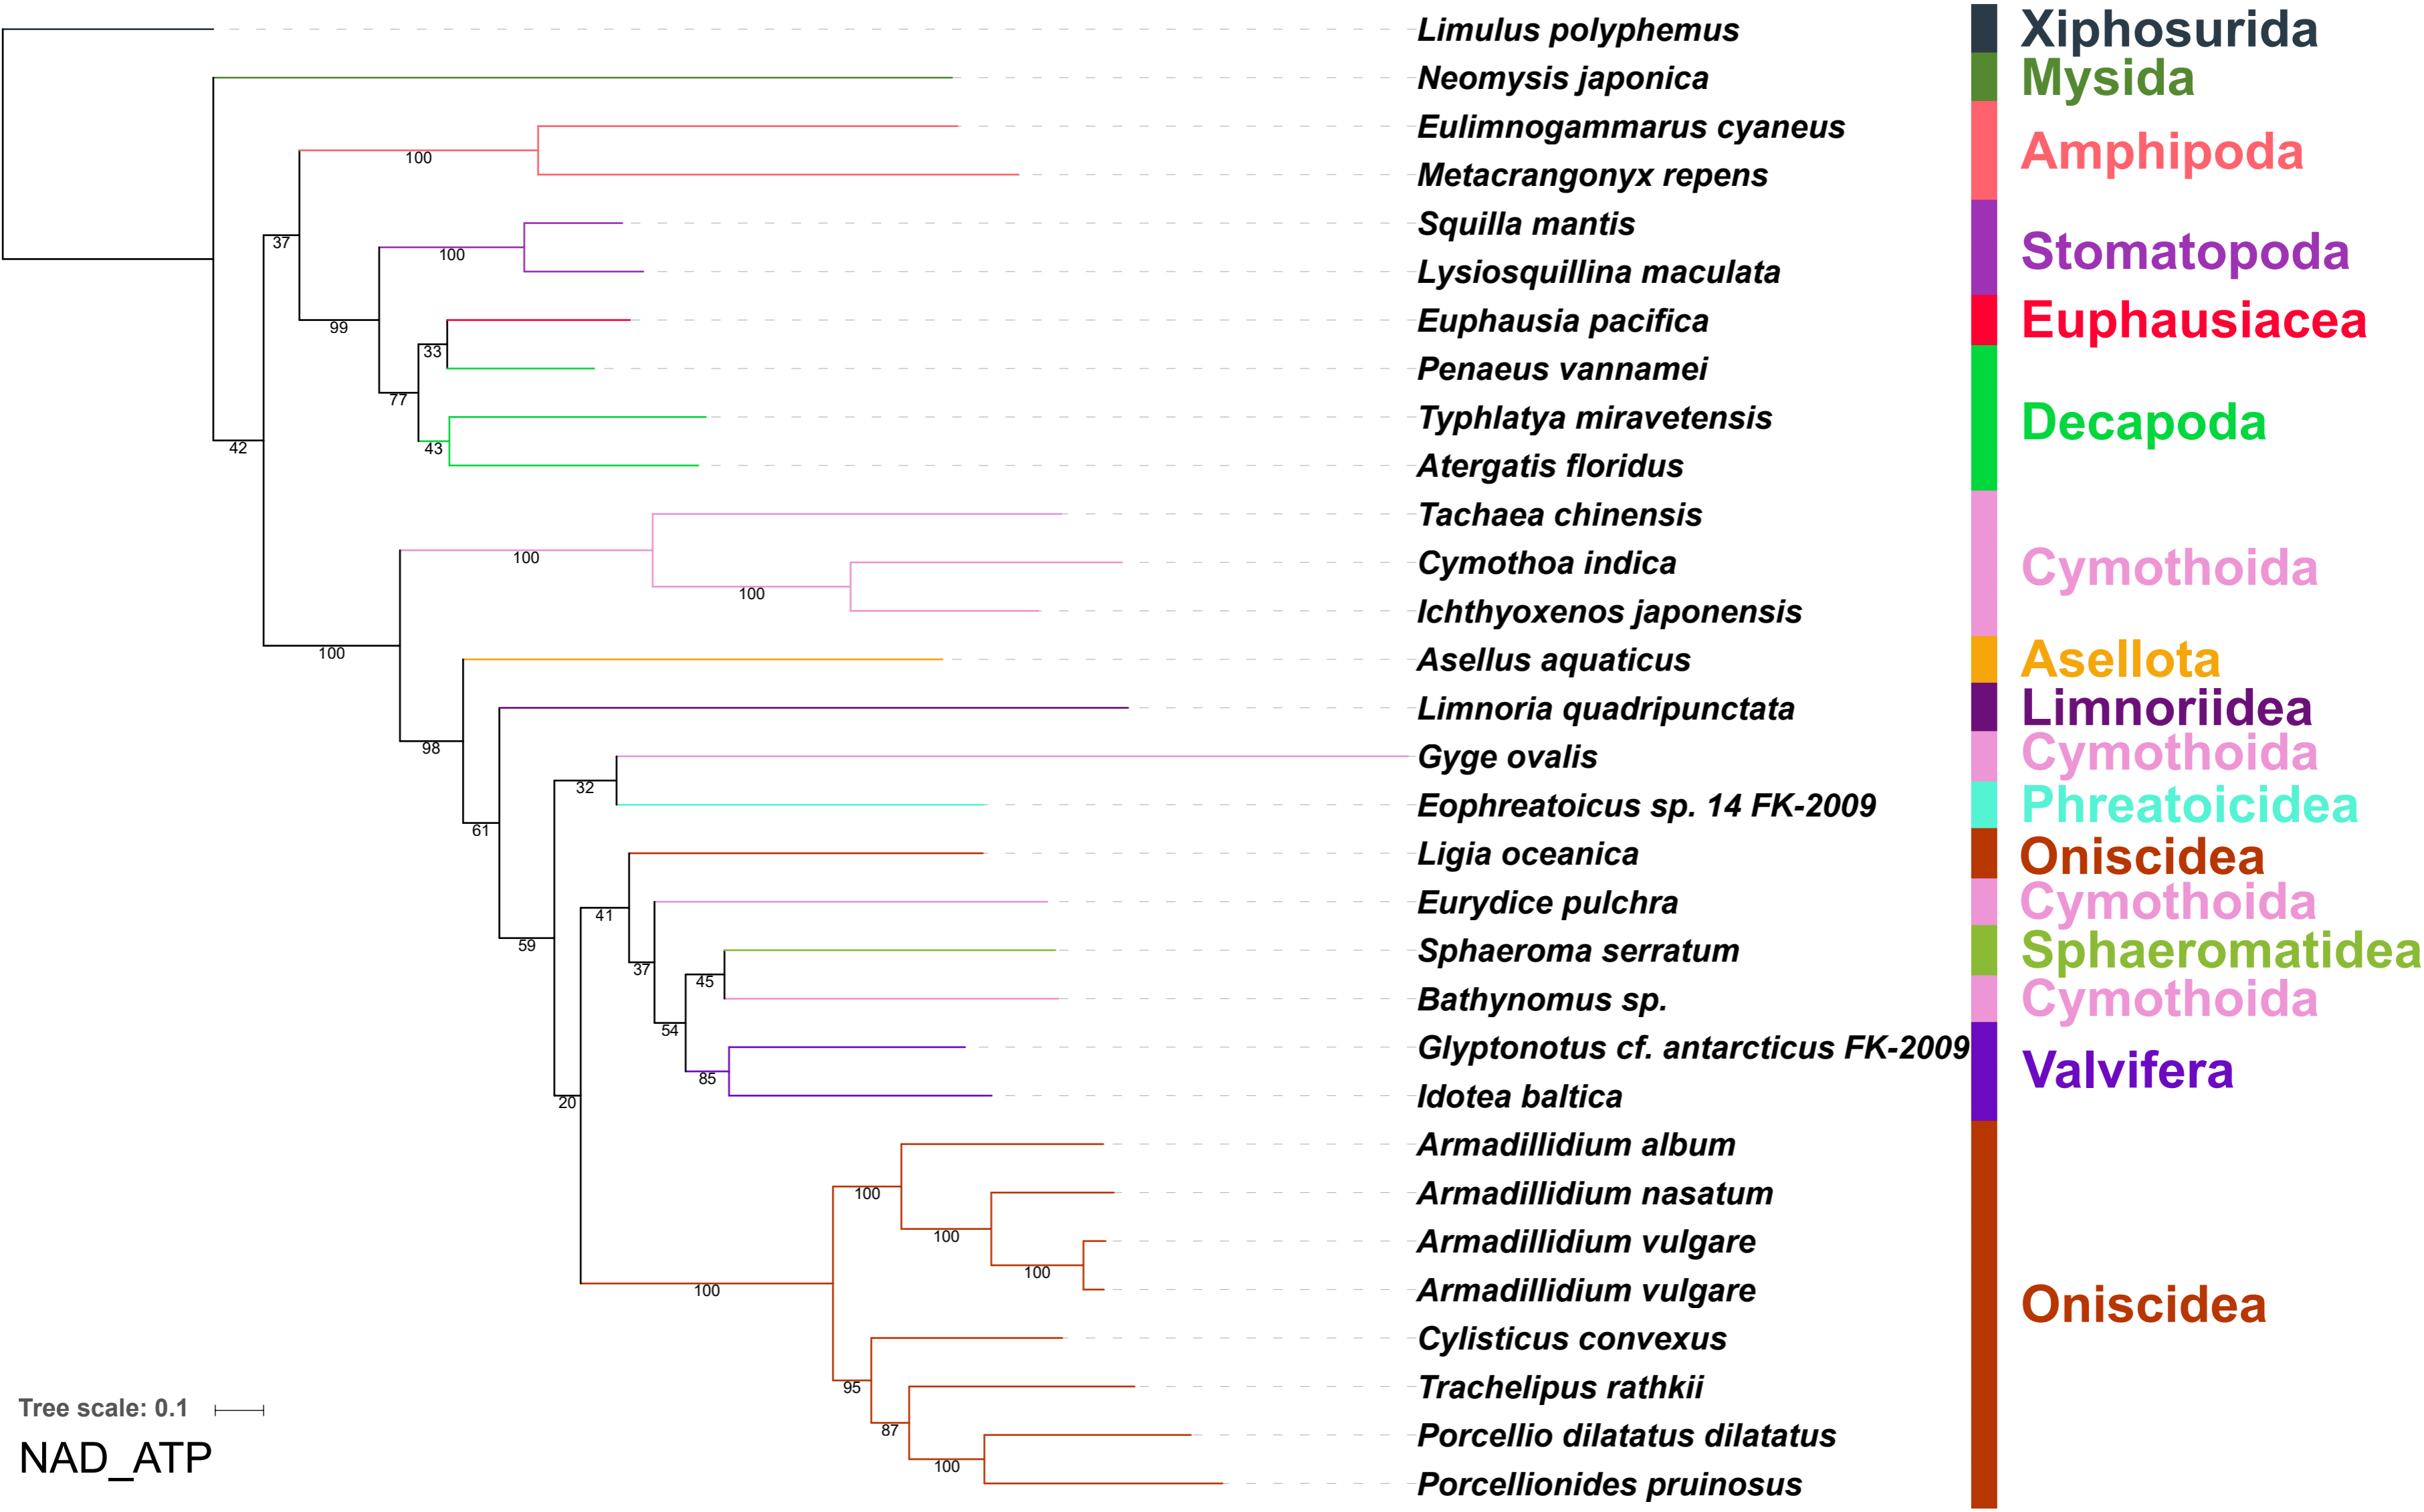

Tree scale: 0.1  
NAD\_ATP

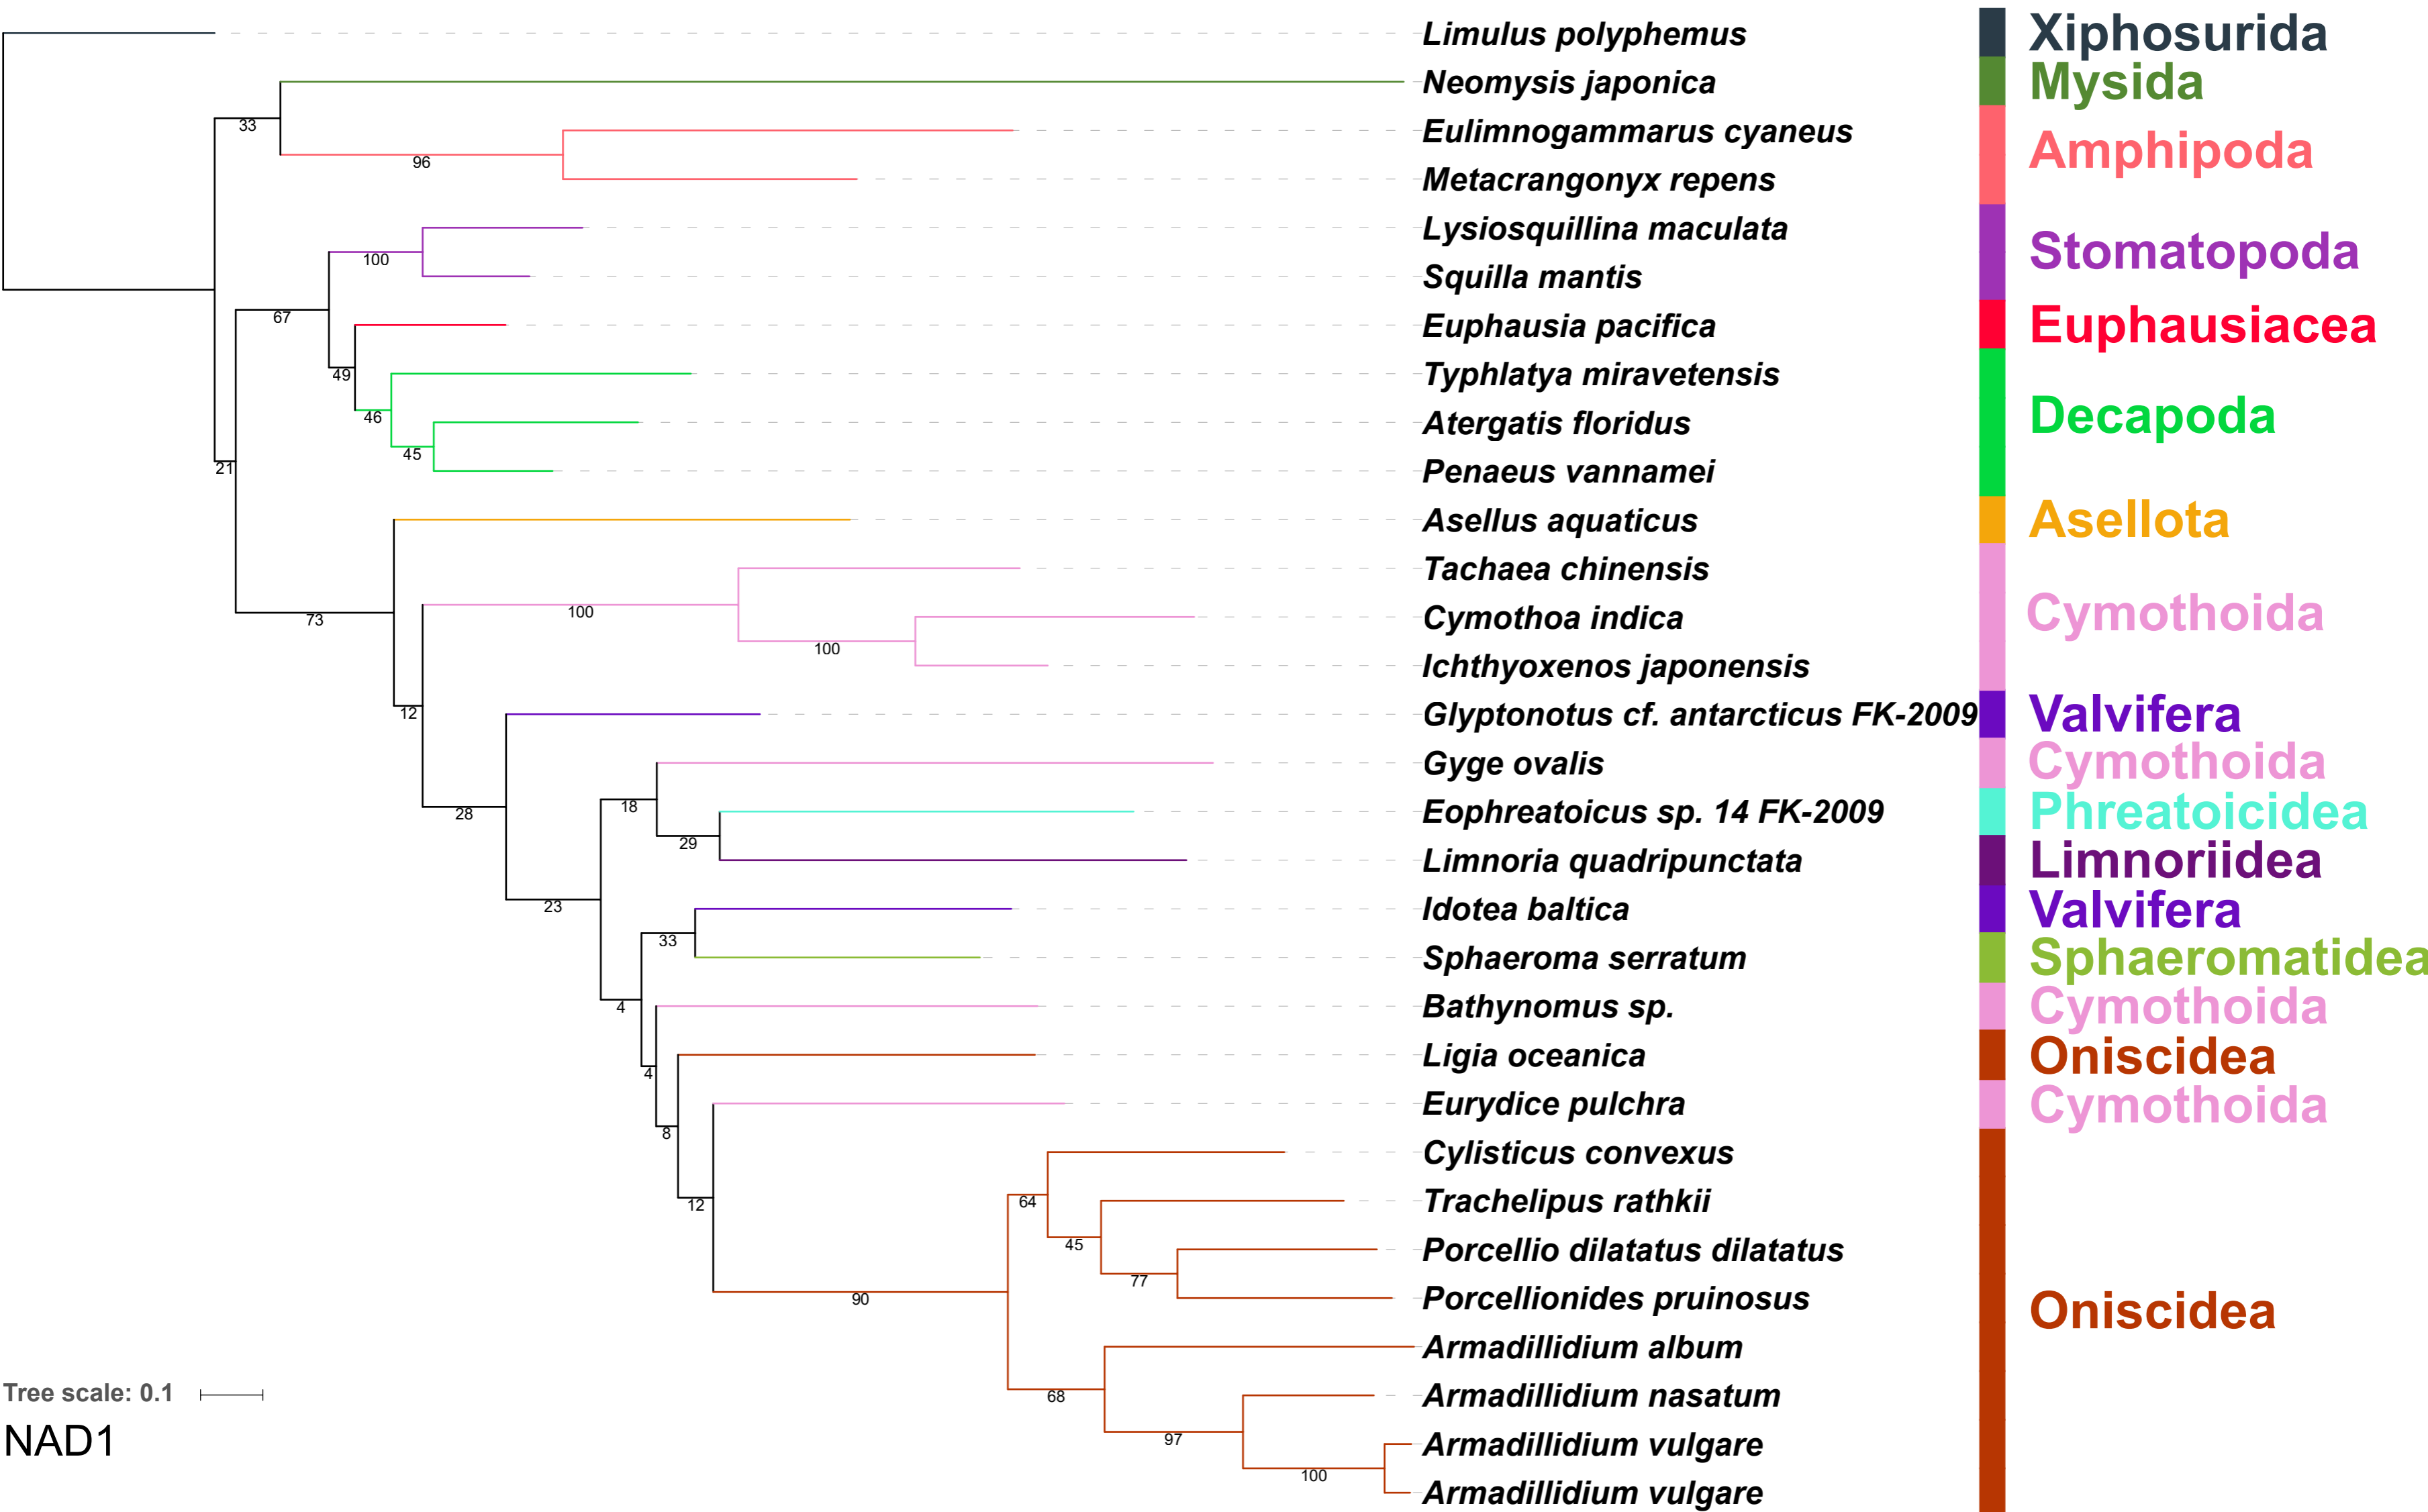

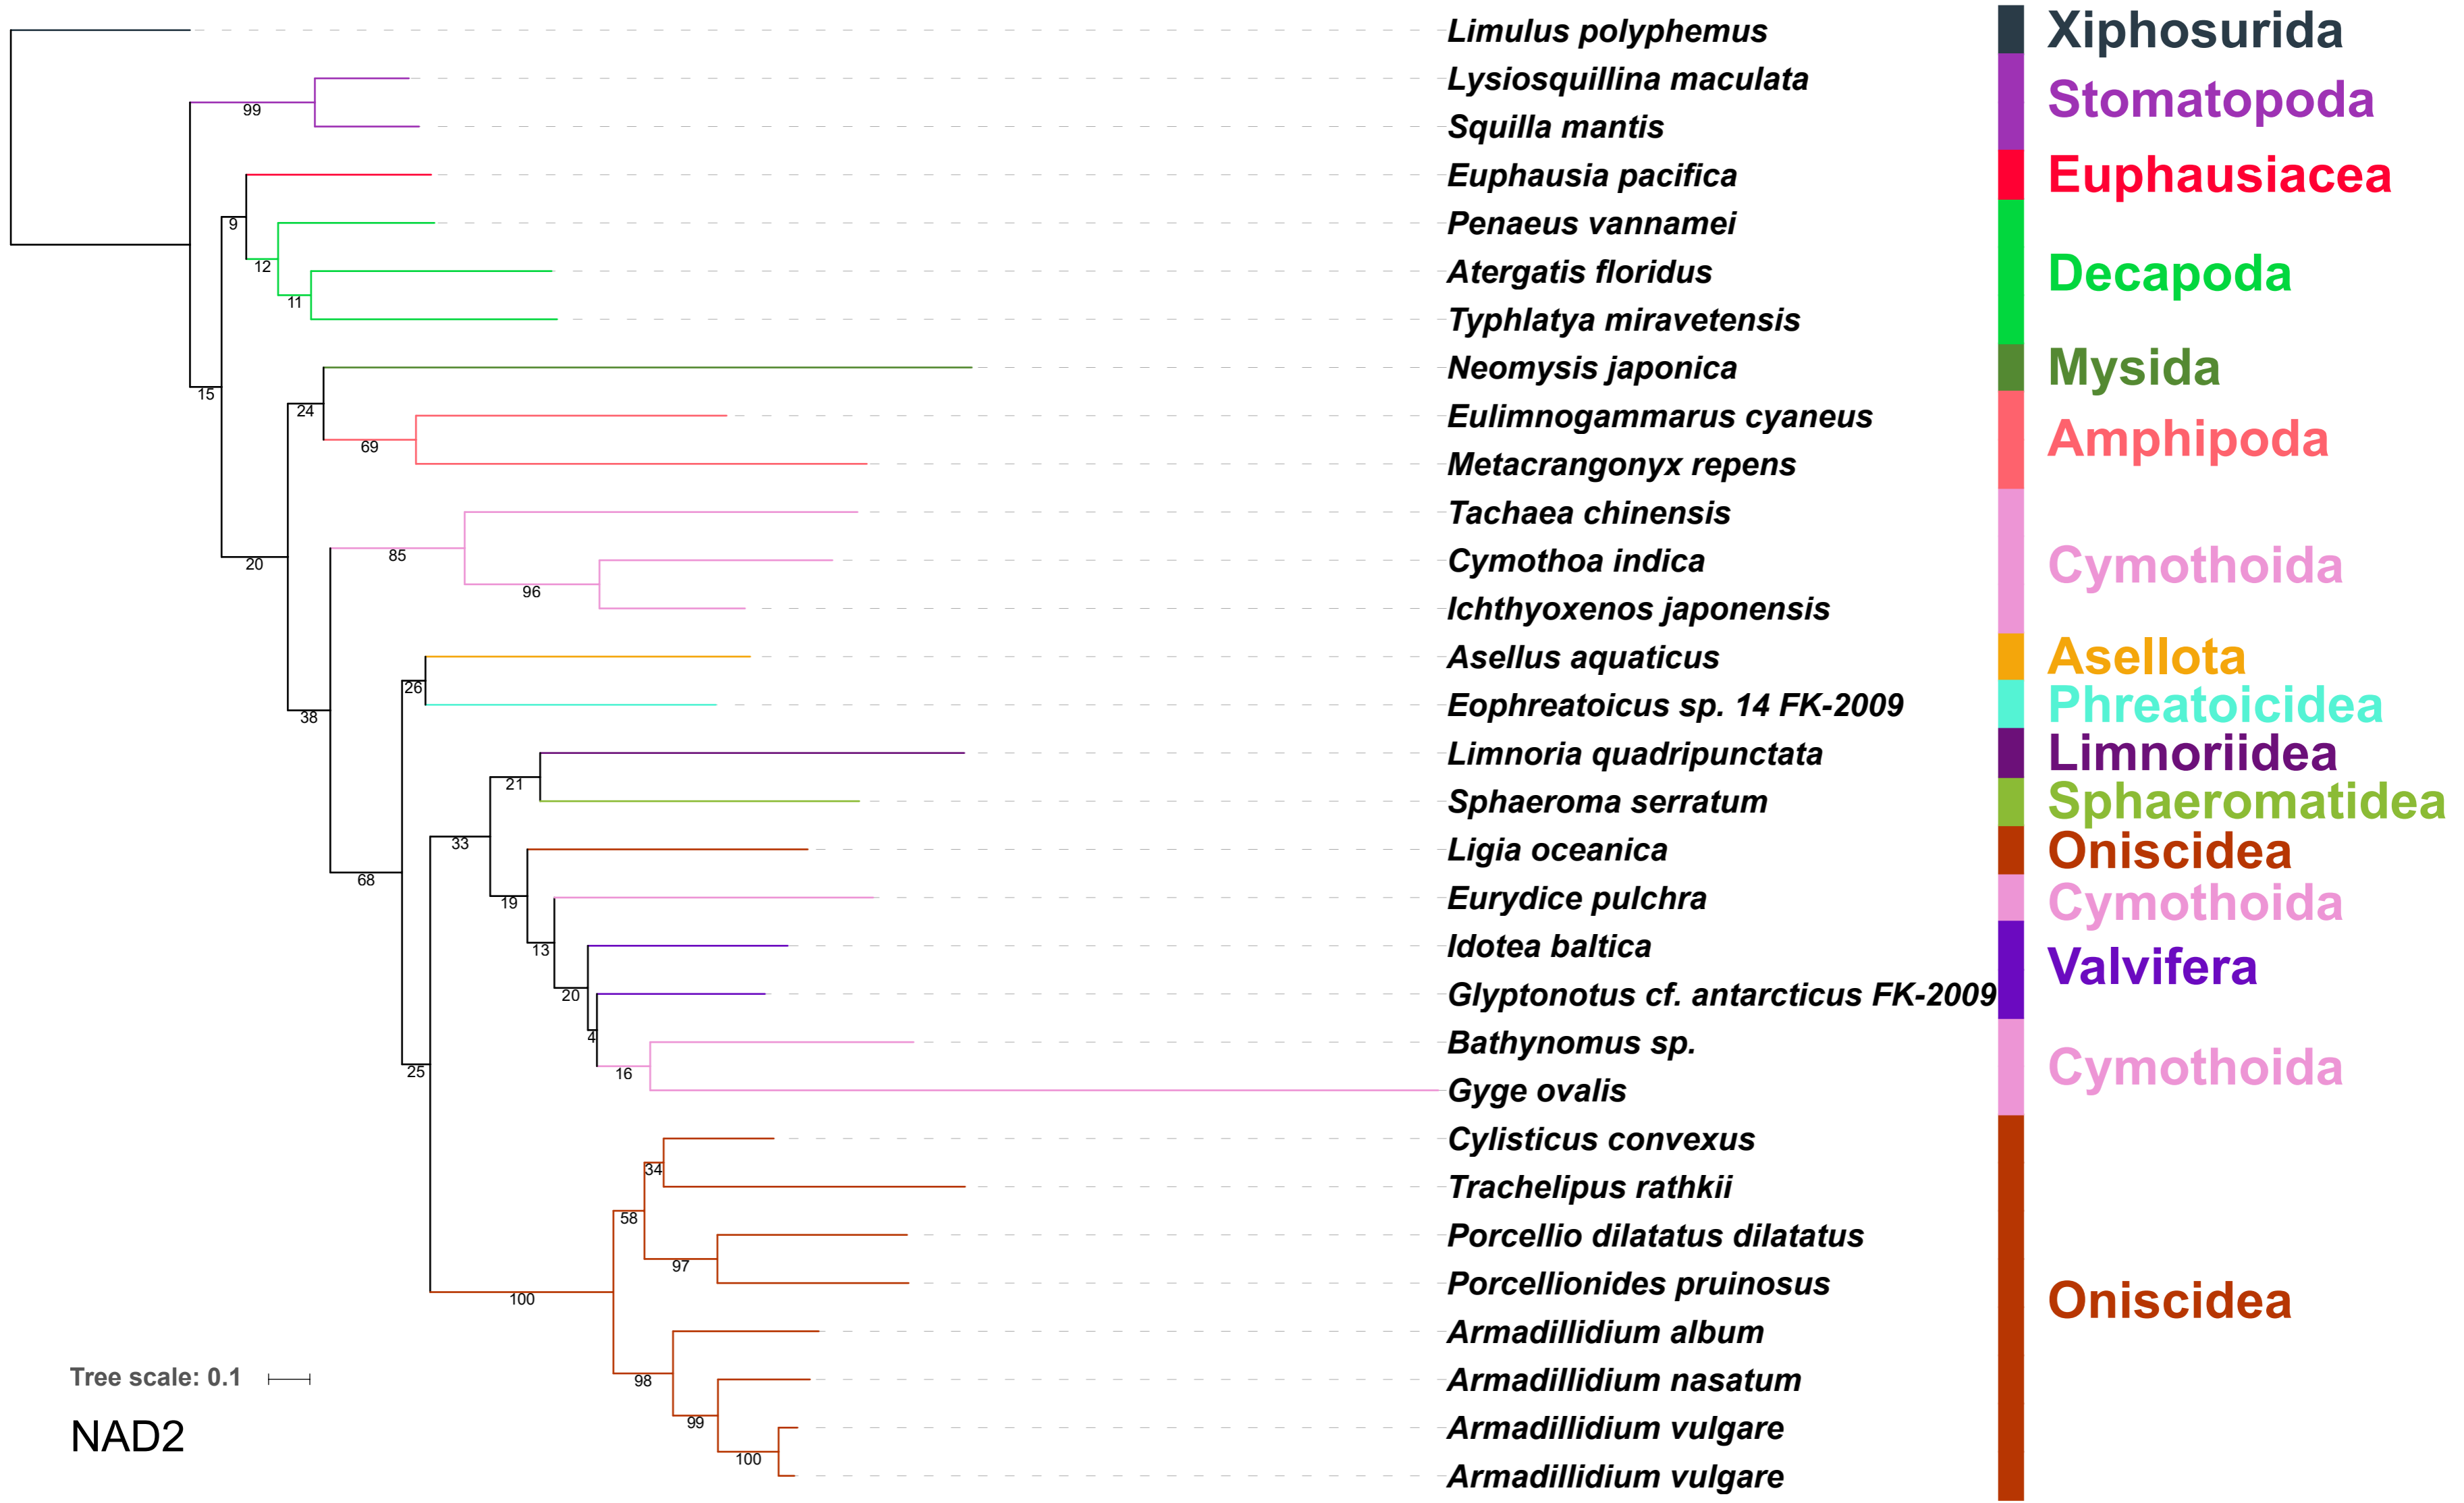

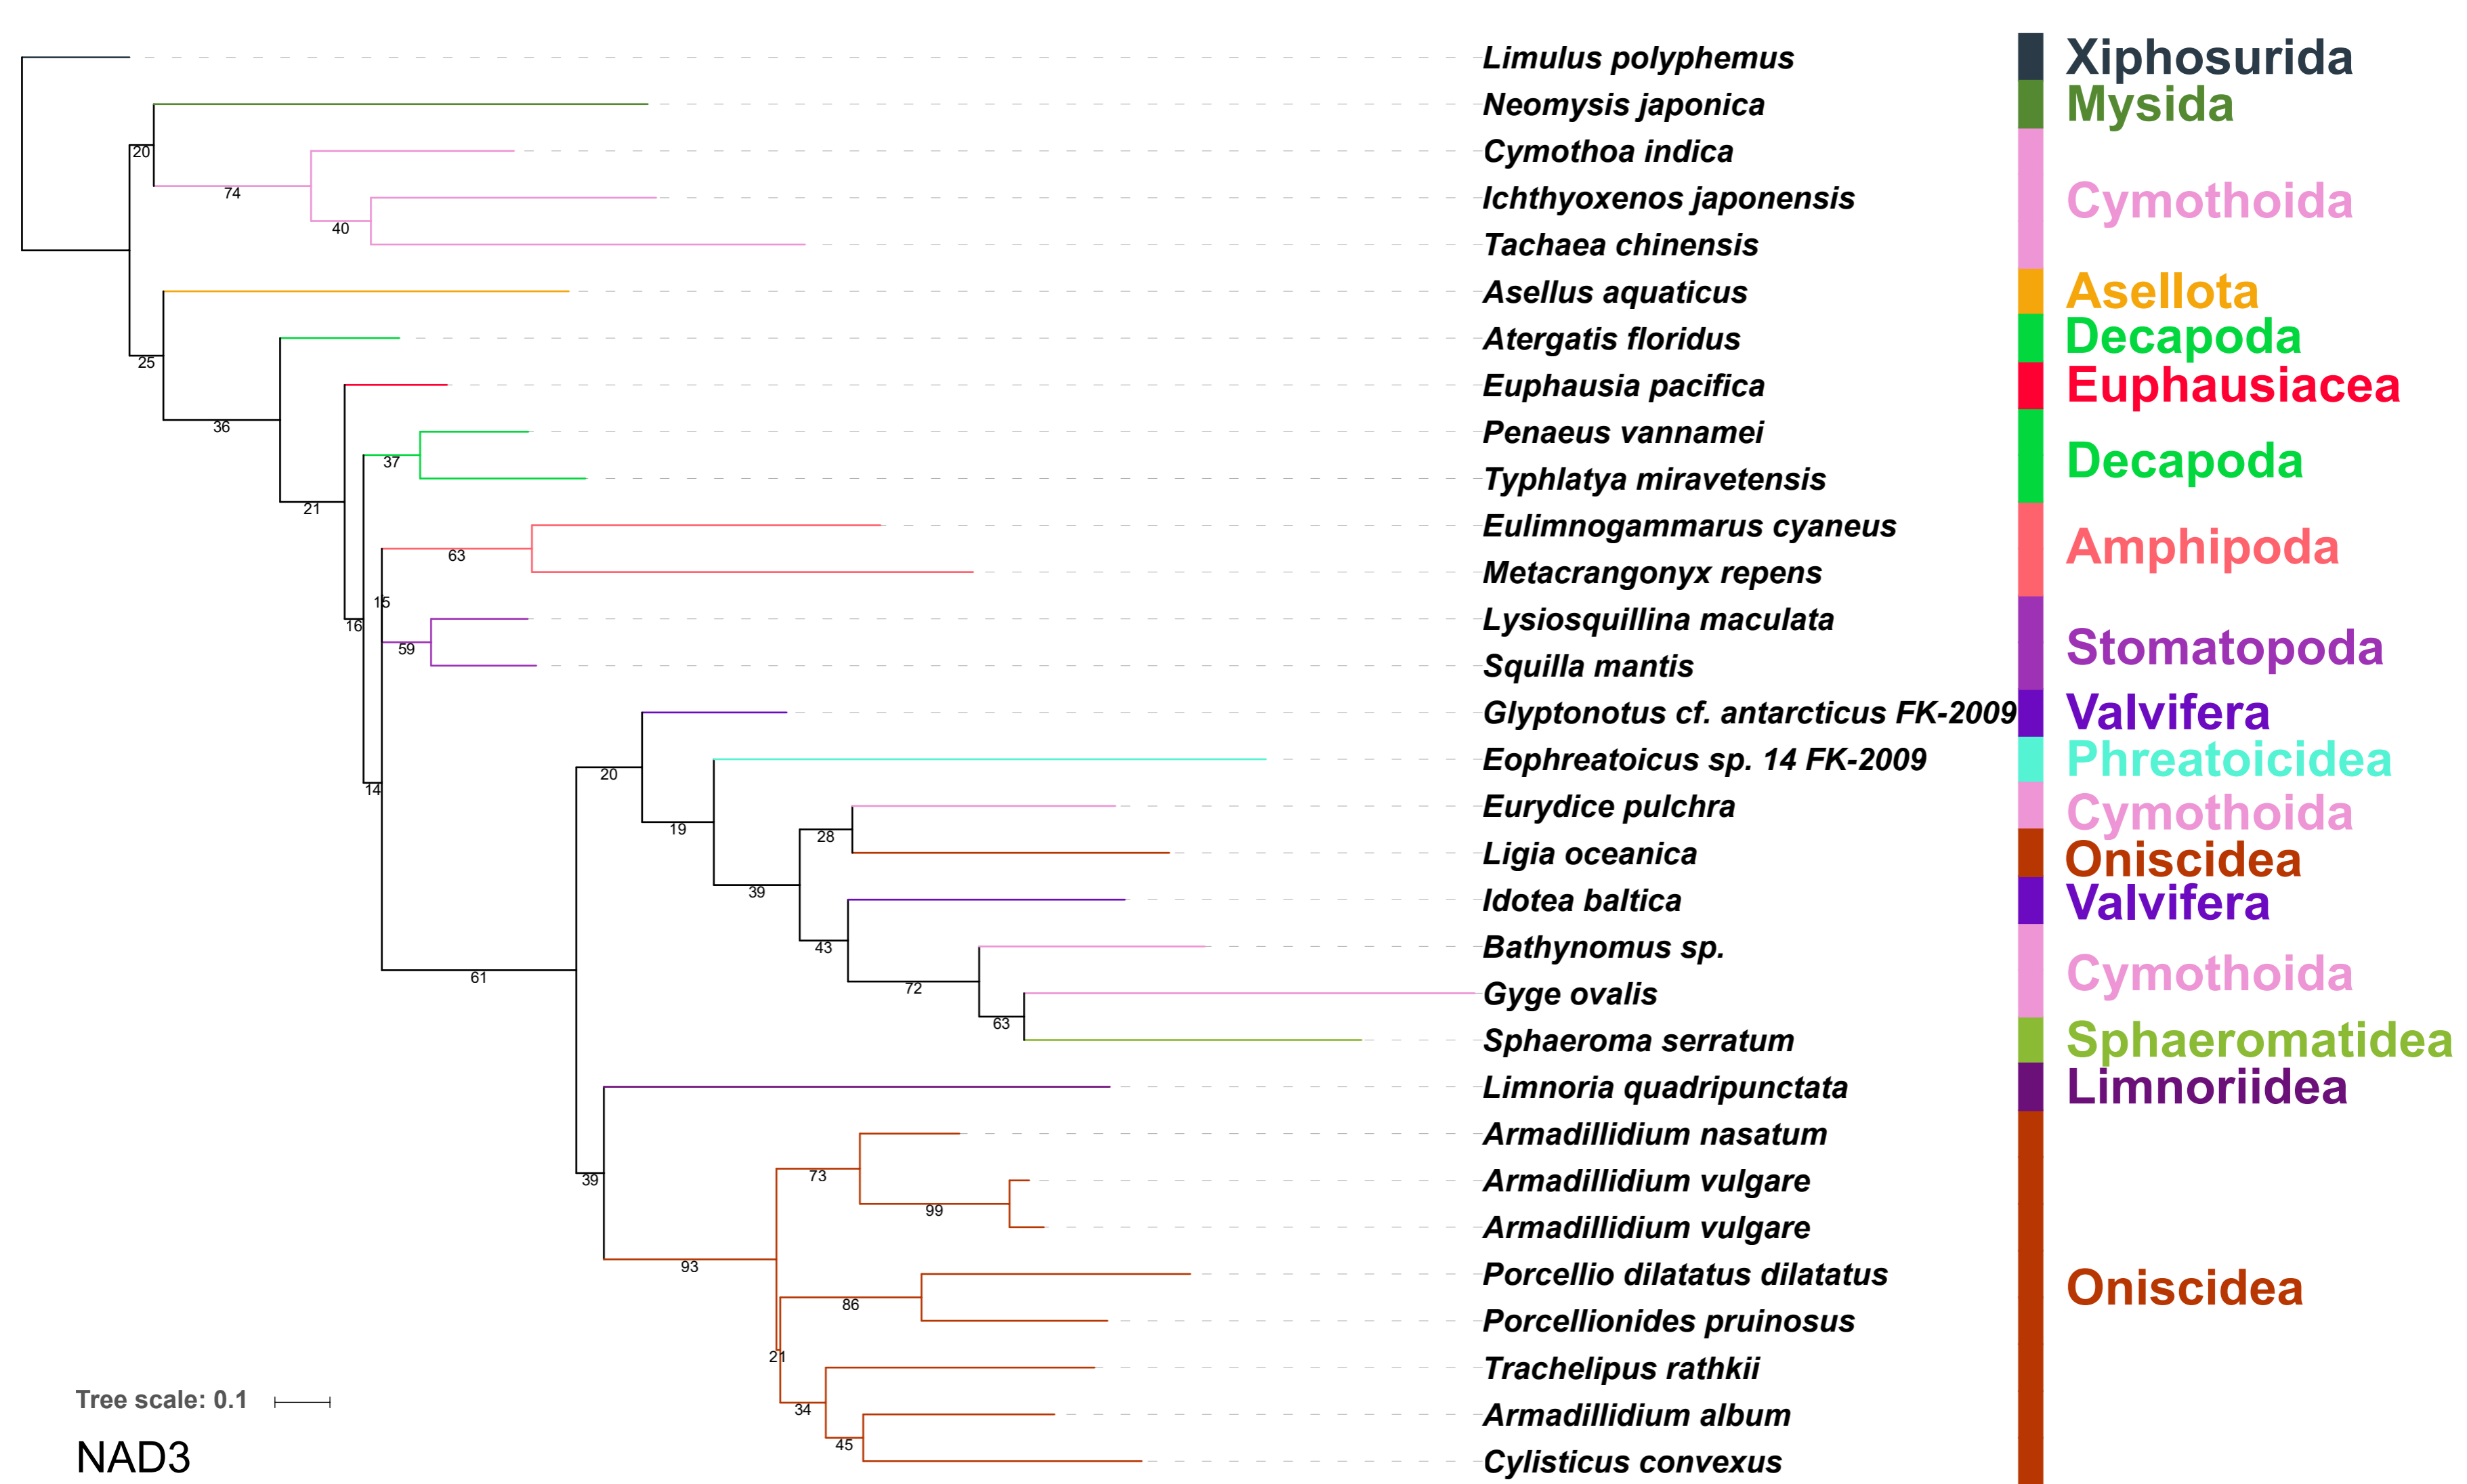



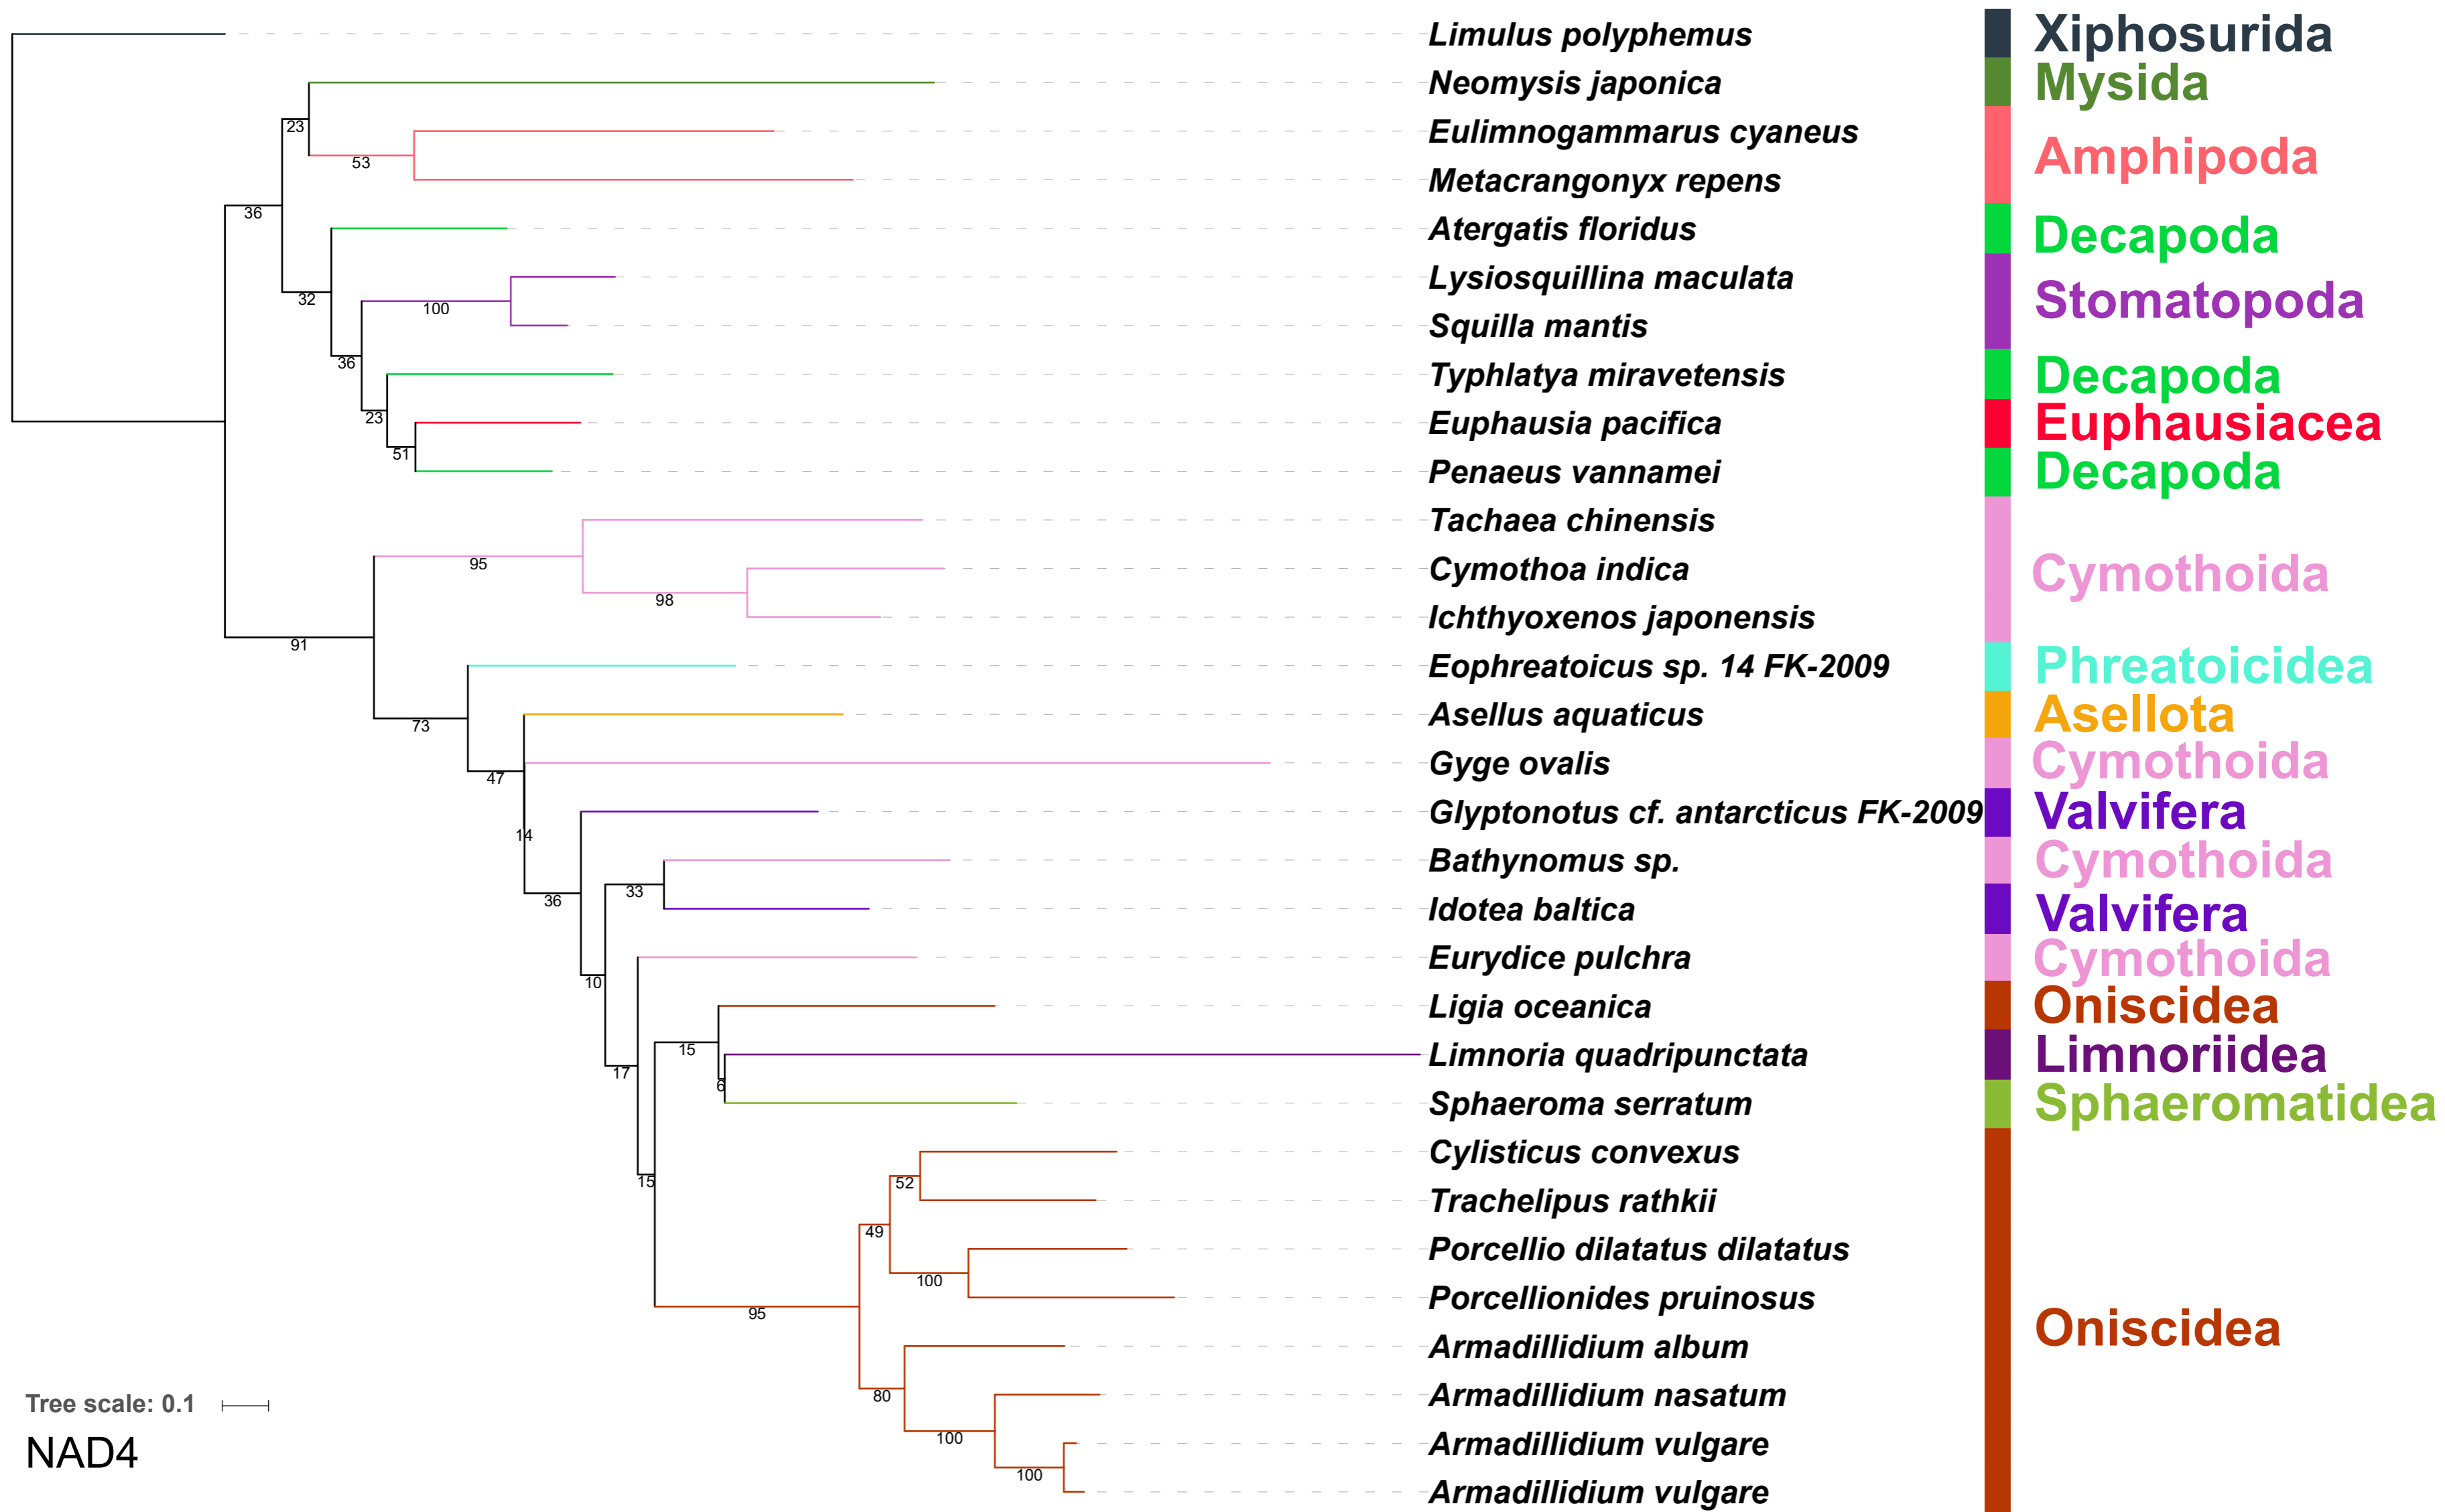

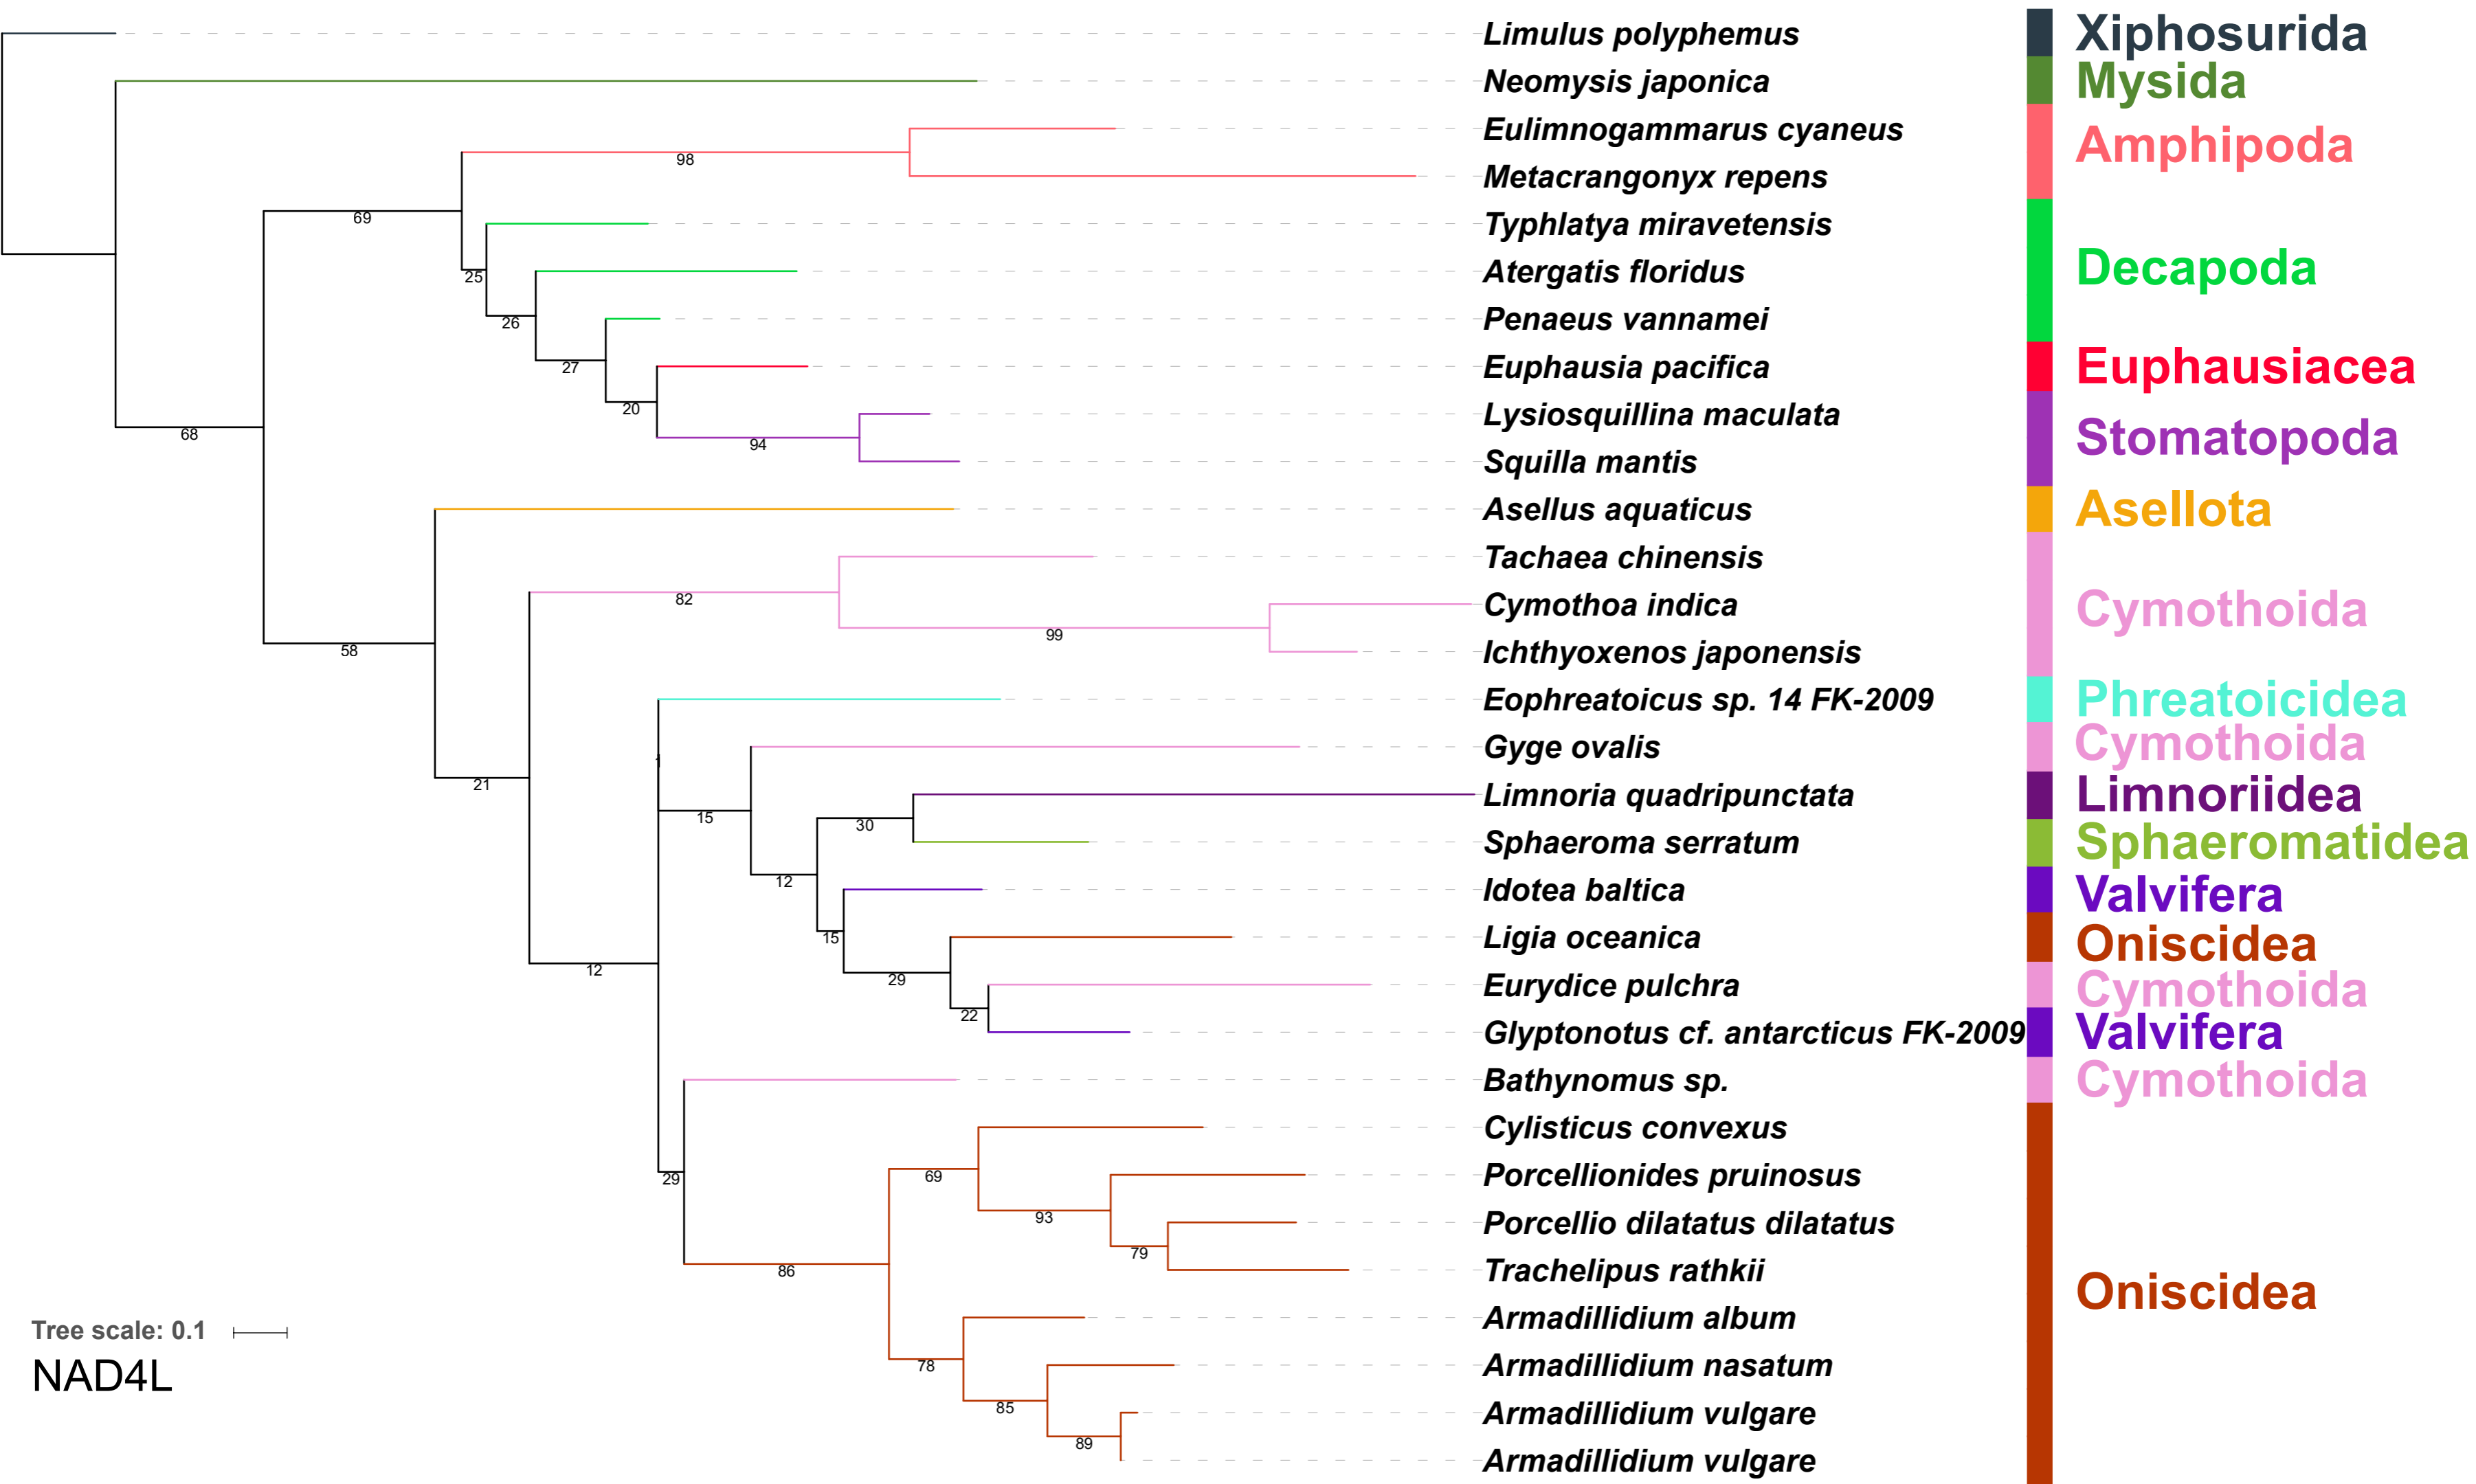

Tree scale: 0.1  
NAD4L

- Xiphosurida
- Mysida
- Amphipoda
- Decapoda
- Euphausiacea
- Stomatopoda
- Asellota
- Cymothoidea
- Phreatoicidea
- Cymothoidea
- Limnoriidea
- Sphaeromatidea
- Valvifera
- Oniscidea
- Cymothoidea
- Valvifera
- Cymothoidea
- Oniscidea

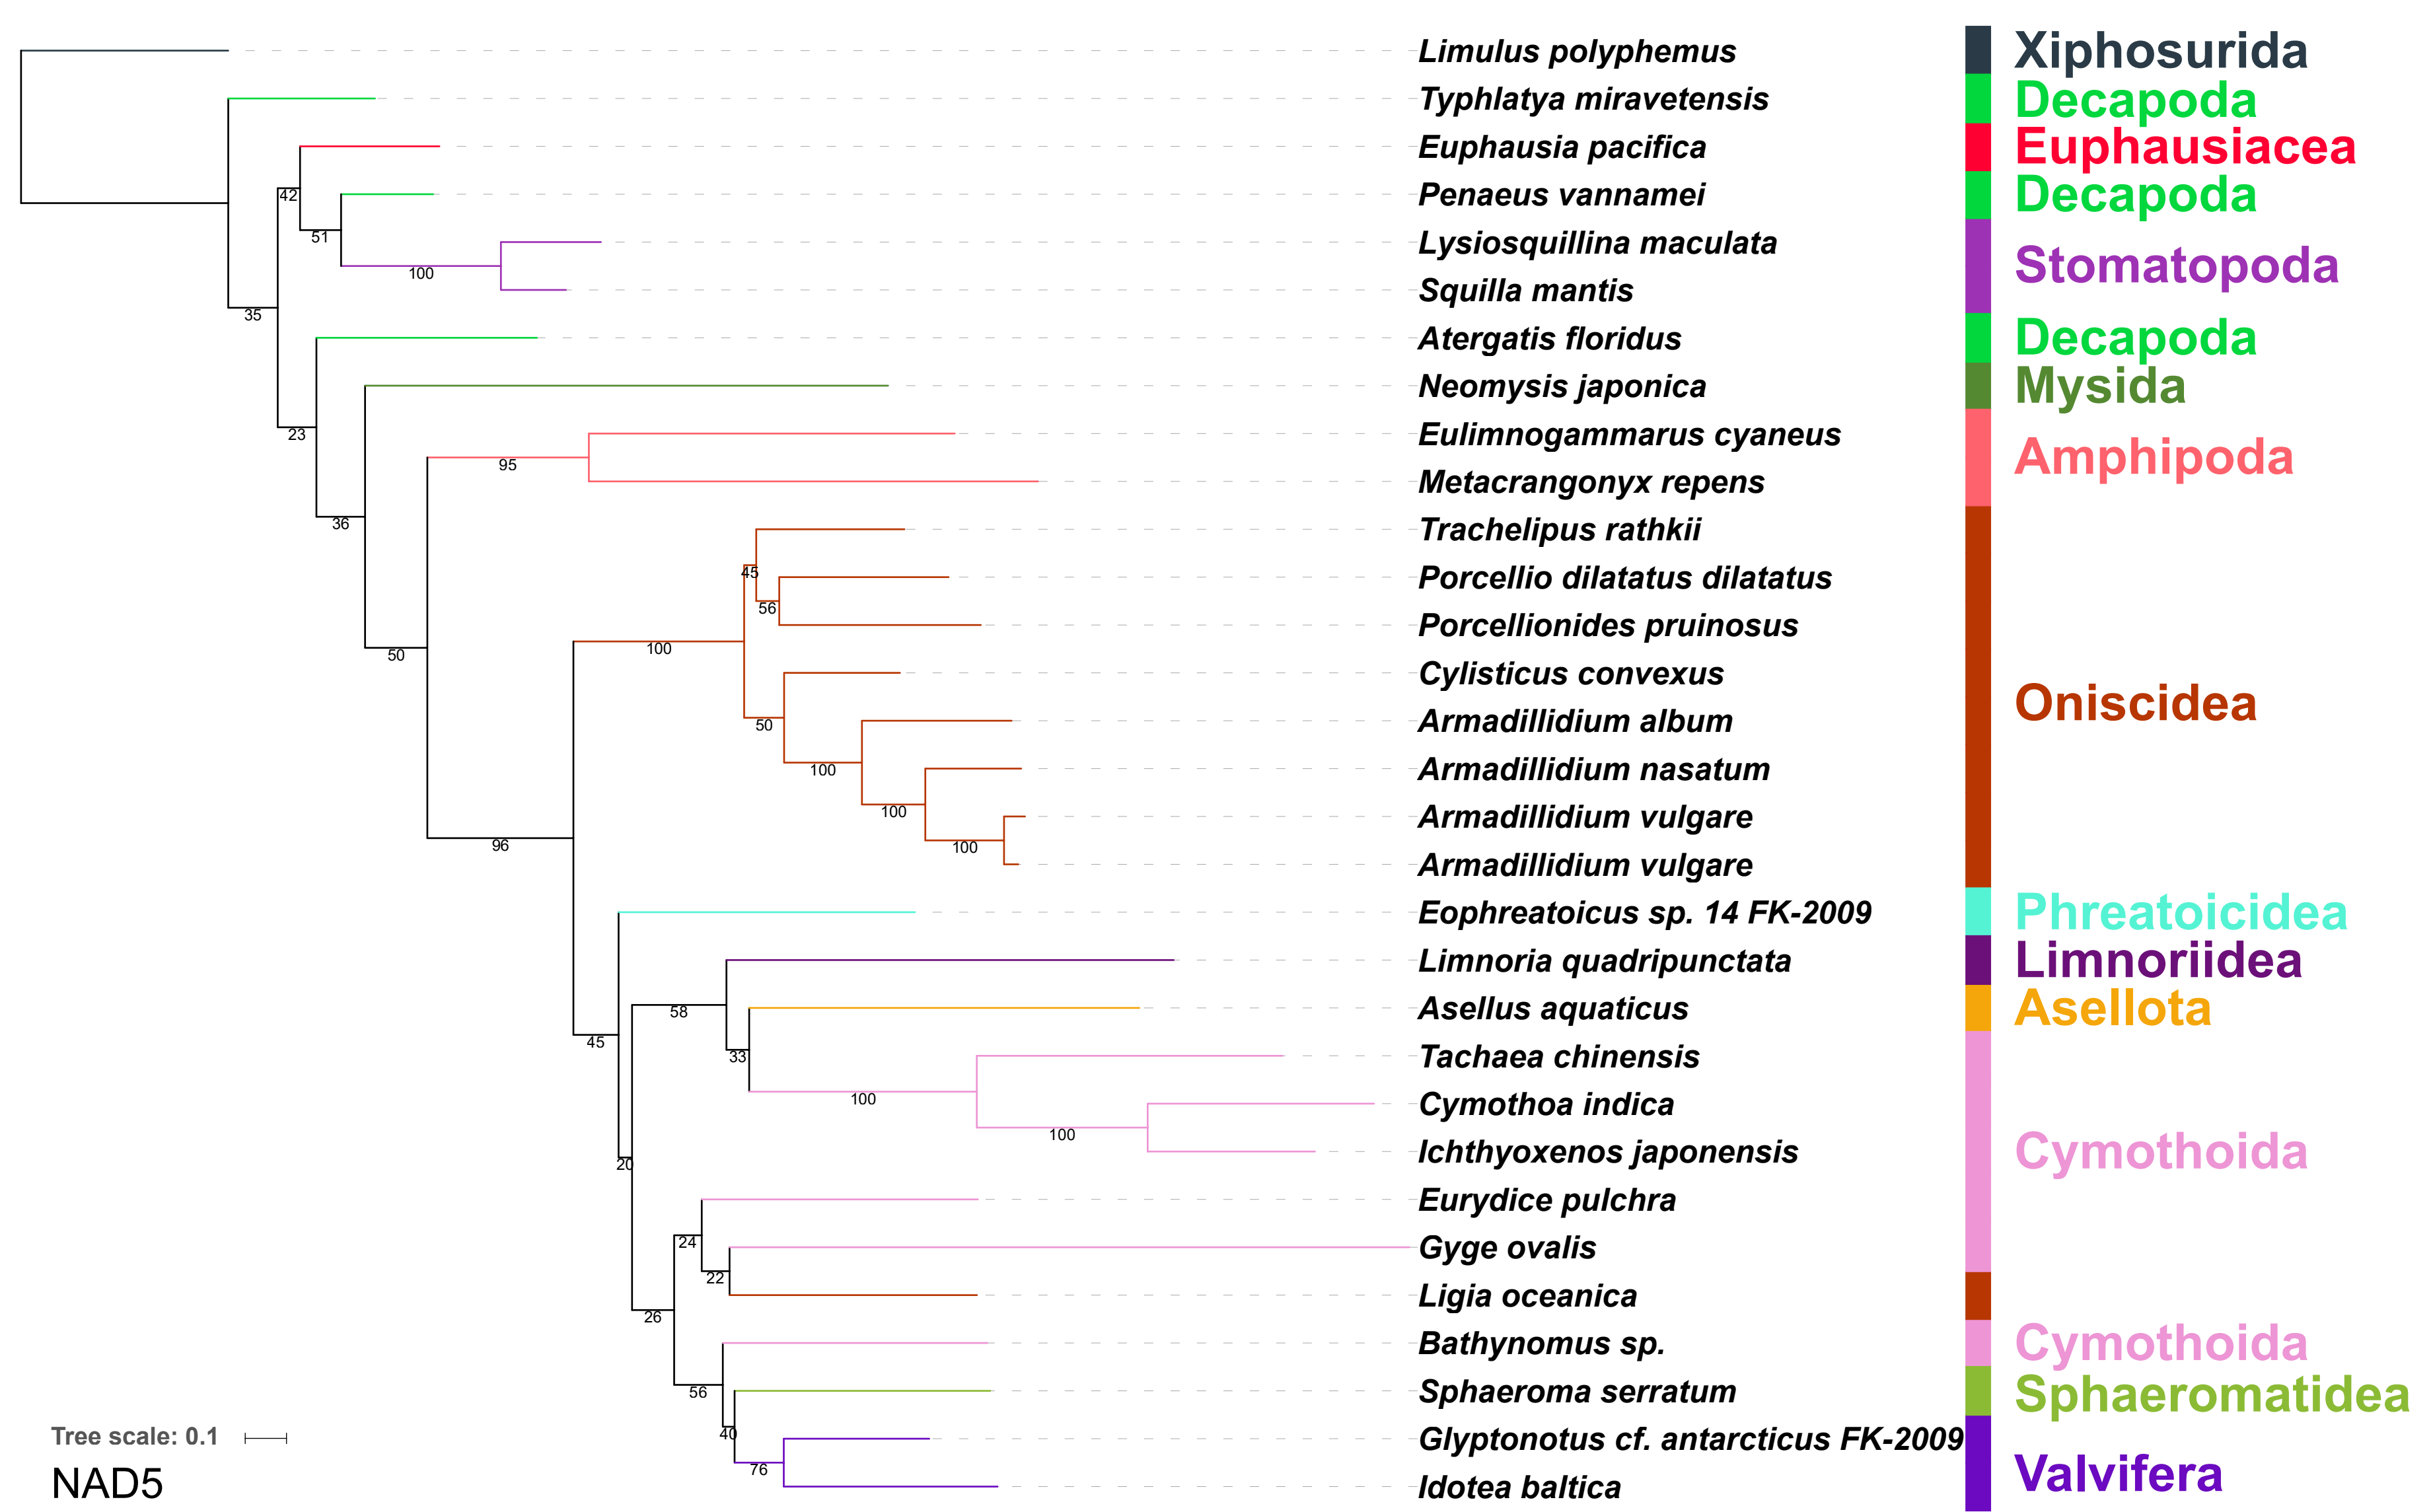

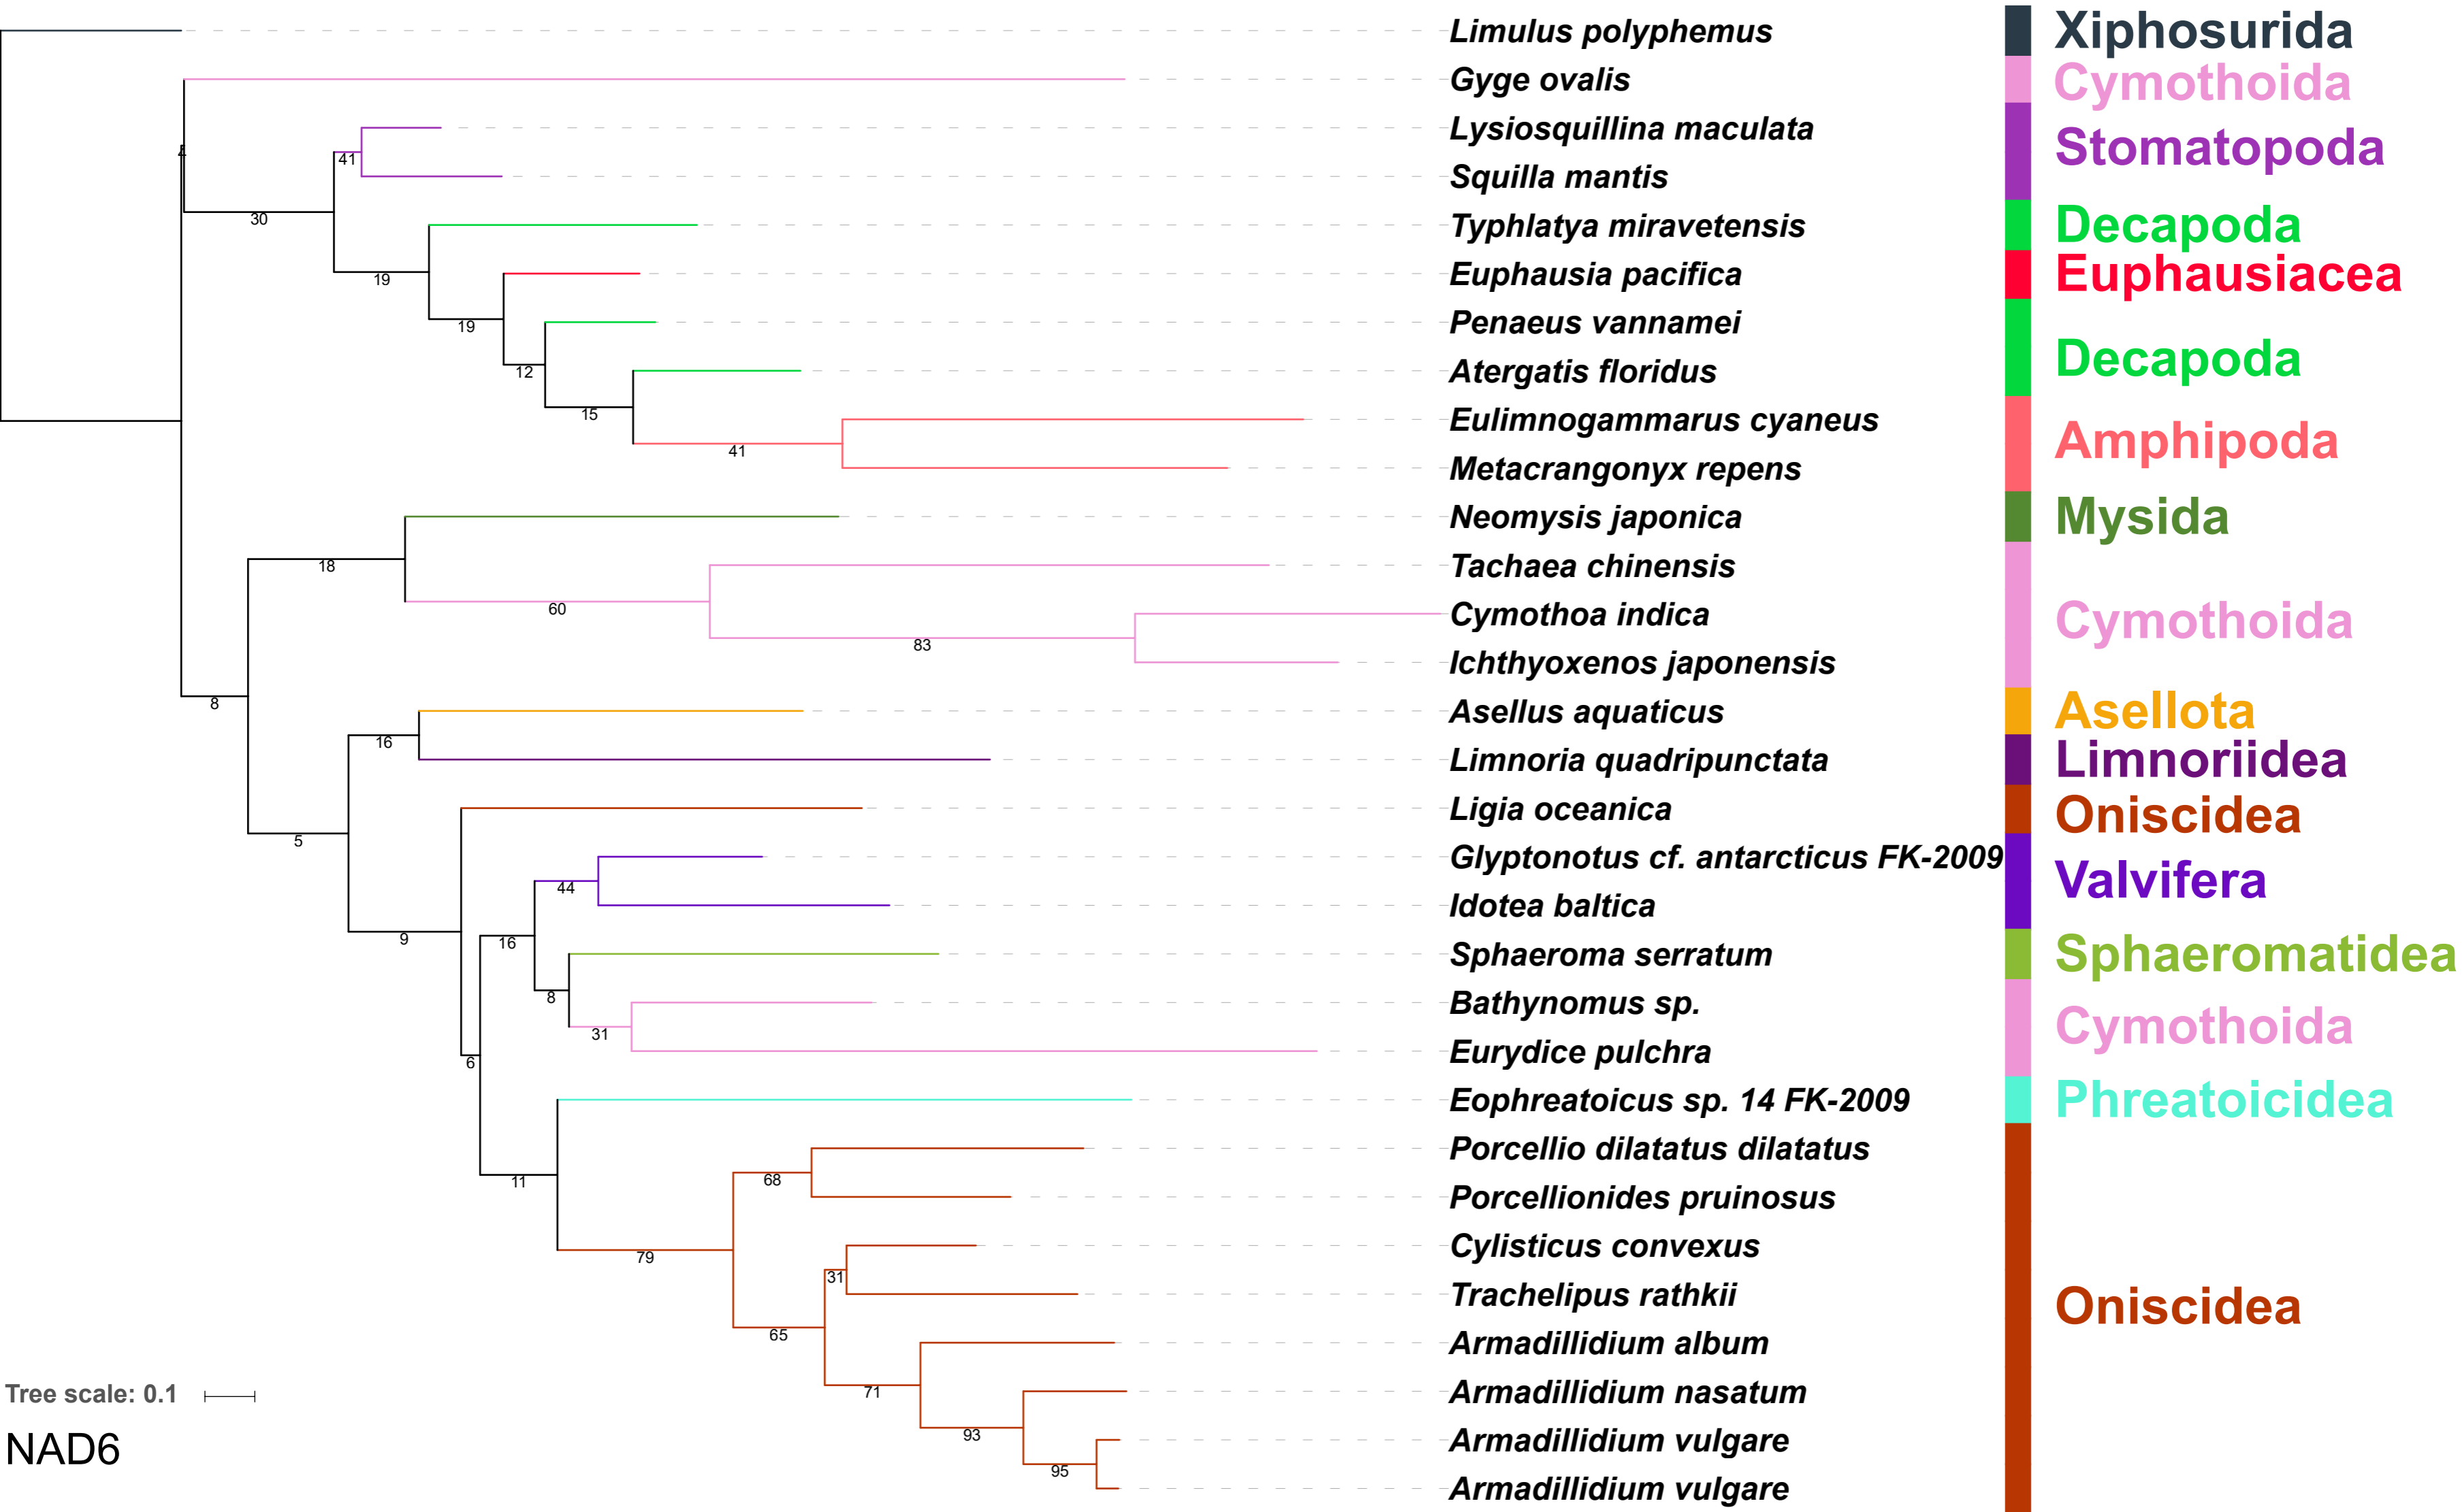

Tree scale: 0.1  
NAD6

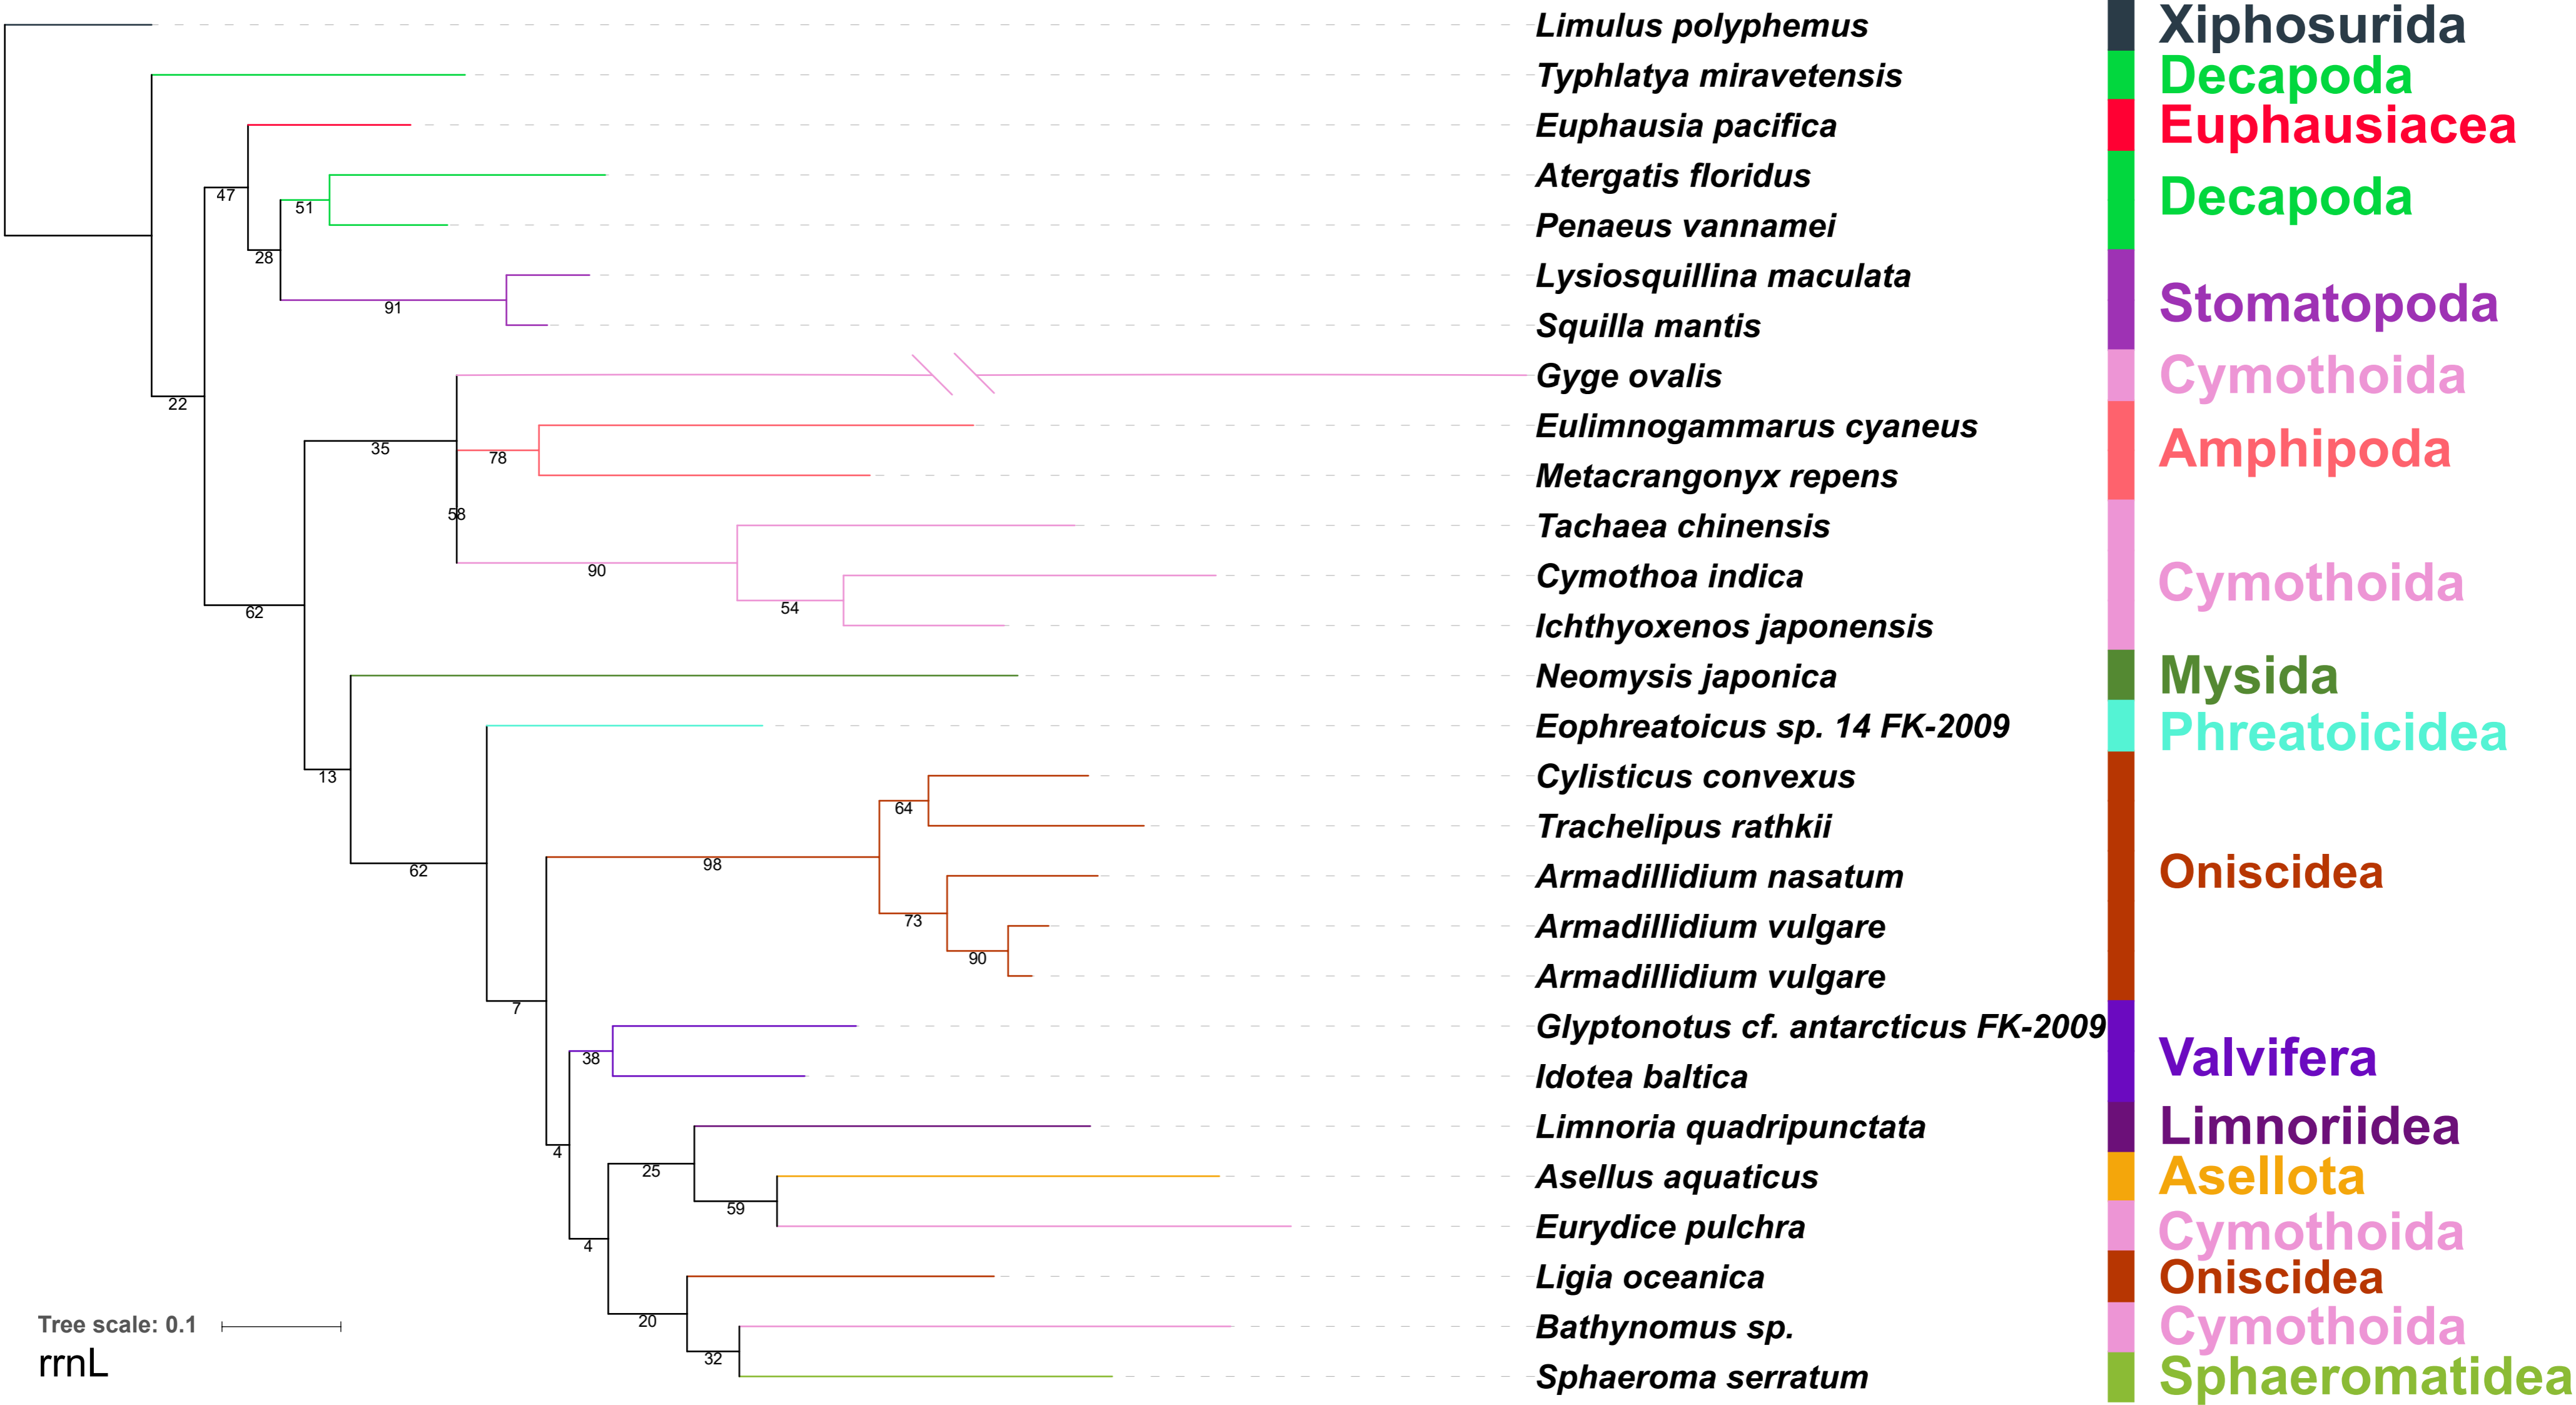

- Xiphosurida
- Decapoda
- Euphausiacea
- Decapoda
- Stomatopoda
- Cymothoidea
- Amphipoda
- Cymothoidea
- Mysida
- Phreatoicidea
- Oniscidea
- Valvifera
- Limnoriidea
- Asellota
- Cymothoidea
- Oniscidea
- Cymothoidea
- Sphaeromatidea

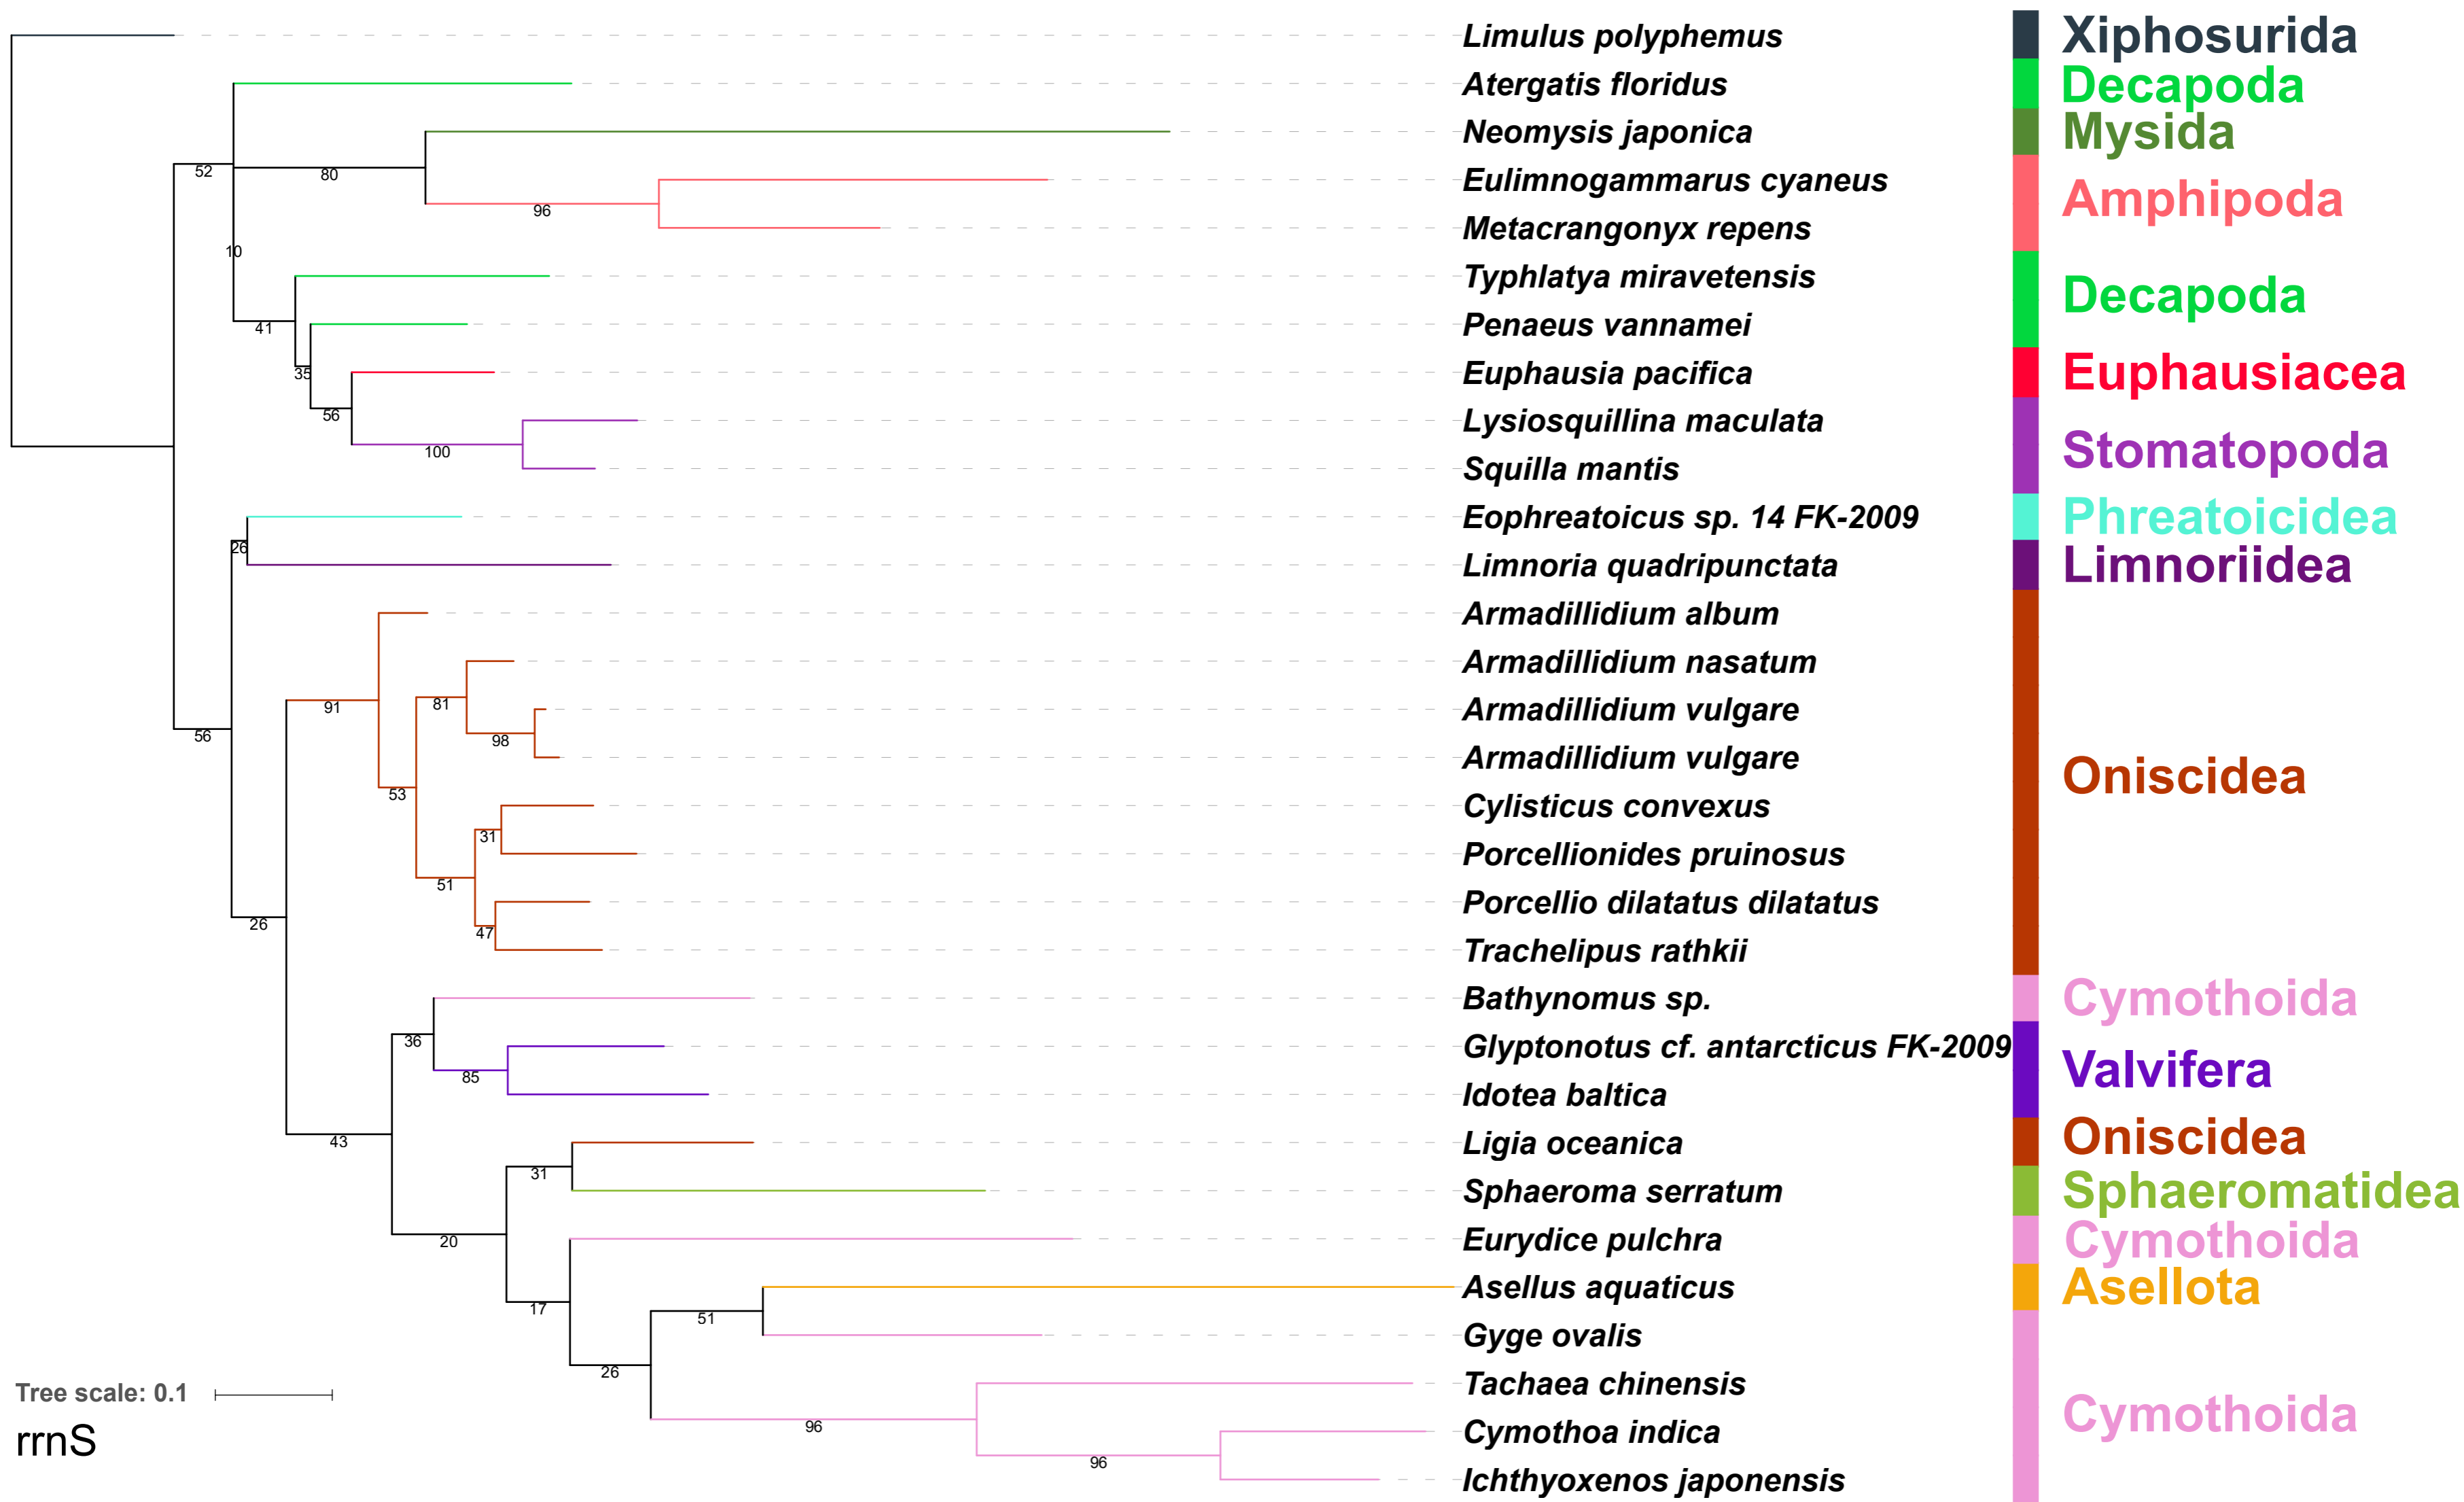

Supplement: Supplementary file [file media-2.pdf]
